# Supplementary material for: Mapping of a novel clubroot resistance QTL using ddRAD-seq in Chinese cabbage (Brassica rapa L.)
Source: BMC Plant Biol. 2019 Jan 8;19:13. doi: 10.1186/s12870-018-1615-8 (PMC6325862; doi:10.1186/s12870-018-1615-8)
Supplement: Supplementary file 5 — Genes located within the 4.0 Mbp CRs region of B. rapa genome were retrieved from the EnsemblePlants database (206 genes in excel file). (XLSX 1412 kb) [file 12870_2018_1615_MOESM5_ESM.xlsx]

## Sheet: Sheet1
	IVFCAASv1																						B
	chrom	pos	SF-1	SF-2	SF-3	SF-4	SF-5	SF-6	SF-7	SF-8	SF-9	SF-10	SF-11	SF-12	SF-13	SF-14	SF-15	SF-16	SF-17	SF-18	SF-19	SF-20	SF-21	SF-22	SF-23	SF-24	SF-39	SF-40	SF-41	SF-42	SF-43	SF-44	SF-45	SF-46	SF-47	SF-48	SF-49	SF-50	SF-51	SF-52	SF-53	SF-54	SF-55	SF-56	SF-57	SF-59	SF-67	SF-101	SF-102
	A01	80707	H	B	H	B	A	H	A	H	H	H	H	H	A	A	A	A	H	B	B	H	H	H	H	H	A	A	H	A	B	A	A	B	A	H	B	A	B	B	A	B	A	A	H	B	H	A	H
	A01	126647	H	B	H	B	A	H	A	H	H	H	H	H	A	A	A	A	H	B	B	H	H	H	H	H	A	A	H	A	B	A	A	B	A	H	B	A	B	B	A	B	A	A	H	B	H	A	H
	A01	135315	H	B	H	B	A	H	A	H	H	H	H	H	A	A	A	A	H	B	B	H	H	H	H	H	A	A	H	A	B	A	A	B	A	H	B	A	B	B	A	B	A	A	H	B	H	H	H
	A01	359112	H	B	H	B	A	H	A	H	H	H	H	H	A	A	A	A	H	B	B	H	H	H	H	H	A	A	H	A	B	A	A	B	A	H	B	A	B	B	A	B	A	A	H	B	H	H	H
	A01	479177	A	B	H	B	A	A	A	H	H	H	H	H	A	A	A	A	A	B	B	H	A	H	H	H	A	A	H	A	B	A	A	B	A	H	B	A	B	B	A	B	A	A	H	B	H	H	H
	A01	479231	A	B	H	B	A	A	A	H	H	H	H	H	A	A	A	A	A	B	B	H	A	H	H	H	A	A	H	A	B	A	A	B	A	H	B	A	B	B	A	B	A	A	H	B	H	H	H
	A01	672725	A	H	H	H	A	A	A	H	H	H	H	H	A	A	A	A	A	H	H	H	A	H	H	H	A	A	H	A	H	A	A	B	H	H	H	A	H	H	A	H	A	A	H	H	H	H	H
	A01	819020	A	B	H	H	A	A	A	H	H	H	H	H	A	A	A	A	A	B	B	H	A	H	H	H	A	A	H	A	B	A	A	B	H	H	B	A	B	B	A	B	A	A	H	B	H	H	H
	A01	1047476	A	B	H	H	A	A	A	H	H	H	H	H	A	A	H	A	A	B	B	H	A	H	H	H	A	A	H	A	B	A	H	B	H	H	B	A	B	H	A	B	A	A	H	B	H	H	H
	A01	1047483	A	B	H	H	A	A	A	H	H	H	H	H	A	A	H	A	A	B	B	H	A	H	H	H	A	A	H	A	B	A	H	B	H	H	B	A	B	H	A	B	A	A	H	B	H	H	H
	A01	1047530	A	B	H	H	A	A	A	H	H	H	H	H	A	A	H	A	A	B	B	H	A	H	H	H	A	A	H	A	B	A	H	B	H	H	B	A	B	H	A	B	A	A	H	B	H	H	H
	A01	1047543	A	B	H	H	A	A	A	H	H	H	H	H	A	A	H	A	A	B	B	H	A	H	H	H	A	A	H	A	B	A	H	B	H	H	B	A	B	H	A	B	A	A	H	B	H	H	H
	A01	1047557	A	B	H	H	A	A	A	H	H	H	H	H	A	A	H	A	A	B	B	H	A	H	H	H	A	A	H	A	B	A	H	B	H	H	B	A	B	H	A	B	A	A	H	B	H	H	H
	A01	1047582	A	B	H	H	A	A	A	H	H	H	H	H	A	A	H	A	A	B	B	H	A	H	H	H	A	A	H	A	B	A	H	B	H	H	B	A	B	H	A	B	A	A	H	B	H	H	H
	A01	1079421	A	B	H	H	A	A	A	H	H	H	H	H	A	A	H	A	A	B	B	H	A	H	H	H	A	A	H	A	B	A	H	B	H	H	B	A	B	H	A	B	A	A	H	B	H	H	H
	A01	1079548	A	B	H	H	A	A	A	H	H	H	H	H	A	A	H	A	A	B	B	H	A	H	H	H	A	A	H	A	B	A	H	B	H	H	B	A	B	H	A	B	A	A	H	B	H	H	H
	A01	1079572	A	B	H	H	A	A	A	H	H	H	H	H	A	A	H	A	A	B	B	H	A	H	H	H	A	A	H	A	B	A	H	B	H	H	B	A	B	H	A	B	A	A	H	B	H	H	H
	A01	1152689	A	B	H	H	A	A	A	H	H	H	H	H	A	A	H	A	A	B	B	H	A	H	H	H	A	A	H	A	B	A	H	B	H	H	B	A	B	H	A	B	A	A	H	B	H	H	H
	A01	1166485	A	H	H	H	A	A	A	H	A	H	H	A	A	A	H	A	A	H	H	H	A	H	H	H	A	A	A	A	H	A	H	B	B	H	H	A	H	H	A	H	A	A	H	H	H	H	H
	A01	1166491	A	H	H	H	A	A	A	H	A	H	H	A	A	A	H	A	A	H	H	B	A	H	H	H	A	A	A	A	H	A	H	B	B	H	H	A	H	H	A	H	A	A	H	H	H	H	H
	A01	1166761	A	H	H	H	A	A	A	H	A	H	H	A	A	A	H	A	A	H	H	H	A	H	H	H	A	A	A	A	H	A	H	B	B	H	H	A	H	H	A	H	A	A	H	H	H	H	H
	A01	1166773	A	H	H	H	A	A	A	H	A	H	H	A	A	A	H	A	A	H	H	B	H	H	H	H	A	A	A	A	H	A	H	B	B	H	H	A	H	H	A	H	A	A	H	H	H	H	H
	A01	1166811	A	H	H	H	A	A	A	H	H	H	H	A	A	A	H	A	A	H	H	H	A	H	H	H	A	A	A	A	H	A	H	B	B	H	H	A	H	H	A	H	A	A	H	H	H	H	H
	A01	1220415	A	B	H	H	A	A	A	H	H	H	H	H	A	A	H	H	A	B	B	H	H	H	H	H	A	A	H	A	B	A	H	B	H	H	B	H	B	H	A	B	A	A	H	B	H	H	H
	A01	1483029	A	H	H	H	A	A	A	H	H	H	H	H	A	A	H	A	A	B	B	H	H	H	H	H	A	A	A	A	B	A	H	B	H	H	B	H	B	H	A	B	A	A	H	B	H	H	H
	A01	1483041	A	H	H	H	A	A	A	H	H	H	H	H	A	A	H	A	A	B	B	H	H	H	H	H	A	A	A	A	B	A	H	B	H	H	B	H	B	H	A	B	A	A	H	B	H	H	H
	A01	1483060	A	H	H	H	A	A	A	H	H	H	H	H	A	A	H	A	A	B	B	H	H	H	H	H	A	A	A	A	B	A	H	B	H	H	B	H	B	H	A	B	A	A	H	B	H	H	H
	A01	1483062	A	H	H	H	A	A	A	H	H	H	H	H	A	A	H	A	A	B	B	H	H	H	H	H	A	A	A	A	B	A	H	B	H	H	B	H	B	H	A	B	A	A	H	B	H	H	H
	A01	1483075	A	H	H	H	A	A	A	H	H	H	H	H	A	A	H	A	A	B	B	H	H	H	H	H	A	A	A	A	B	A	H	B	H	H	B	H	B	H	A	B	A	A	H	B	H	H	H
	A01	1707333	A	H	H	H	A	A	A	H	H	H	H	H	A	A	H	A	A	B	B	H	H	H	H	H	A	A	A	A	B	A	H	B	H	H	B	H	B	H	A	B	A	A	H	B	H	H	H
	A01	1773958	A	H	H	H	A	A	A	H	H	H	H	H	A	A	H	A	A	B	B	H	A	H	H	H	A	A	A	A	B	A	H	B	H	H	B	H	B	H	A	B	A	A	H	B	H	H	H
	A01	2091795	A	H	H	H	A	A	A	H	H	H	H	H	A	A	H	H	A	B	B	H	A	H	H	H	A	A	A	A	B	H	H	B	H	H	B	H	B	H	A	B	A	A	H	B	H	H	H
	A01	2091830	A	H	H	H	A	A	A	H	H	H	H	H	A	A	H	H	A	B	B	H	A	H	H	H	A	A	A	A	B	H	H	B	H	H	B	H	B	H	A	B	A	A	H	B	H	H	H
	A01	2091845	A	H	H	H	A	A	A	H	H	H	H	H	A	A	H	H	A	B	B	H	A	H	H	H	A	A	A	A	B	H	H	B	H	H	B	H	B	H	A	B	A	A	H	B	H	H	H
	A01	2091926	A	H	H	H	A	A	A	H	H	H	H	H	A	A	H	H	A	B	B	H	A	H	H	H	A	A	A	A	B	H	H	B	H	H	B	H	B	H	A	B	A	A	H	B	H	H	H
	A01	2091950	A	H	H	H	A	A	A	H	H	H	H	H	A	A	H	H	A	B	B	H	A	H	H	H	A	A	A	A	B	H	H	B	H	H	B	H	B	H	A	B	A	A	H	B	H	H	H
	A01	2106843	A	H	H	H	A	A	A	H	H	H	H	H	A	A	H	H	A	B	B	H	A	H	H	H	A	A	A	A	B	H	H	B	H	H	B	H	B	H	A	B	A	A	H	B	H	H	H
	A01	2106908	A	H	H	H	A	A	A	H	H	H	H	H	A	A	H	H	A	B	B	H	A	H	H	H	A	A	A	A	B	H	H	B	H	H	B	H	B	H	A	B	A	A	H	B	H	H	H
	A01	2106966	A	H	H	H	A	A	A	H	H	H	H	H	A	A	H	H	A	B	B	H	A	H	H	H	A	A	A	A	B	H	H	B	H	H	B	H	B	H	A	B	A	A	H	B	H	H	H
	A01	2106969	A	H	H	H	A	A	A	H	H	H	H	H	A	A	H	H	A	B	B	H	A	H	H	H	A	A	A	A	B	H	H	B	H	H	B	H	B	H	A	B	A	A	H	B	H	H	H
	A01	2106983	A	H	H	H	A	A	A	H	H	H	H	H	A	A	H	H	A	B	B	H	A	H	H	H	A	A	A	A	B	H	H	B	H	H	B	H	B	H	A	B	A	A	H	B	H	H	H
	A01	2107039	A	H	H	H	A	A	A	H	H	H	H	H	A	A	H	H	A	B	B	H	A	H	H	H	A	A	A	A	B	H	H	B	H	H	B	H	B	H	A	B	A	A	H	B	H	H	H
	A01	2163570	A	B	B	B	A	A	A	A	H	H	H	B	A	A	B	B	A	B	B	H	H	H	B	H	A	A	A	A	B	H	H	B	H	B	B	A	B	H	A	B	A	A	H	B	B	H	A
	A01	2163571	A	B	B	B	A	A	A	A	H	H	H	B	A	A	B	B	A	B	B	H	H	H	B	H	A	A	A	A	B	H	H	B	H	B	B	A	B	H	A	B	A	A	H	B	B	H	A
	A01	2408844	A	H	H	H	A	A	A	H	H	H	H	H	A	A	H	H	A	B	B	H	A	H	H	H	A	A	A	A	B	H	H	B	H	H	B	H	H	H	A	B	A	A	H	B	H	H	H
	A01	2408845	A	H	H	H	A	A	A	H	H	H	H	H	A	A	H	H	A	B	B	H	A	H	H	H	A	A	A	A	B	H	H	B	H	H	B	H	H	H	A	B	A	A	H	B	H	H	H
	A01	2420809	A	H	H	H	A	A	A	H	H	H	H	H	A	A	H	H	A	B	B	H	A	H	H	H	A	A	A	A	B	H	H	B	H	H	B	H	H	H	A	B	A	A	H	B	H	H	H
	A01	2420811	A	H	H	H	A	A	A	H	H	H	H	H	A	A	H	H	A	B	B	H	A	H	H	H	A	A	A	A	B	H	H	B	H	H	B	H	H	H	A	B	A	A	H	B	H	H	H
	A01	2491057	A	H	H	H	A	A	A	H	H	H	H	H	A	A	H	H	A	B	B	H	A	H	A	H	A	A	A	A	B	H	H	B	H	H	B	H	H	H	A	B	A	A	H	B	H	H	H
	A01	2491092	A	H	H	H	A	A	A	H	H	H	H	H	A	A	H	H	A	B	B	H	A	H	A	H	A	A	A	A	B	H	H	B	H	H	B	H	H	H	A	B	A	A	H	B	H	H	H
	A01	2537054	A	H	H	H	A	A	A	H	H	H	H	H	A	A	H	H	A	B	B	H	A	H	A	H	A	A	A	A	B	H	H	B	H	H	B	H	H	H	A	B	A	A	H	B	H	H	H
	A01	2750056	A	H	H	H	A	A	A	H	H	H	H	A	A	A	H	A	A	B	B	H	A	H	A	H	A	A	A	A	B	H	H	B	H	H	B	H	H	H	A	B	H	A	H	B	H	H	B
	A01	2750073	A	H	A	H	A	A	A	A	H	H	H	A	A	A	H	A	A	B	B	H	A	H	A	H	A	A	A	A	B	H	H	B	H	H	B	H	H	H	A	B	H	A	H	B	H	H	B
	A01	2891660	A	H	H	H	A	A	A	H	H	H	H	A	A	A	H	H	A	B	H	H	A	H	H	H	A	A	A	A	B	H	H	B	H	H	B	H	H	H	A	B	H	A	H	B	H	H	B
	A01	2930991	A	H	H	H	A	A	A	H	H	H	H	A	A	A	H	H	A	B	H	H	A	H	A	H	A	A	A	A	B	H	H	B	H	H	B	H	H	H	A	B	H	A	H	B	H	H	B
	A01	2969267	A	H	H	H	A	A	A	H	H	H	H	A	A	A	H	H	A	B	H	H	A	H	A	H	A	A	A	A	B	H	H	B	H	H	B	H	H	H	A	B	B	A	H	B	H	H	B
	A01	3085135	A	H	H	H	A	A	A	H	H	H	H	A	A	A	H	H	A	B	H	H	A	H	A	H	A	A	A	A	B	H	H	B	H	H	B	H	H	H	A	B	B	A	A	B	H	H	B
	A01	3085150	A	H	H	H	A	A	A	H	H	H	H	A	A	A	H	H	A	B	H	H	A	H	A	H	A	A	A	A	B	H	H	B	H	H	B	H	H	H	A	B	B	A	A	B	H	H	B
	A01	3396576	A	H	B	H	A	A	A	H	H	H	H	A	A	A	H	H	A	B	H	H	A	H	A	H	A	A	A	A	B	H	H	B	H	H	B	H	H	H	A	H	B	A	A	B	H	H	B
	A01	3410448	A	H	B	H	A	A	A	H	H	H	H	A	A	A	H	H	A	B	H	H	A	H	A	H	A	A	A	A	B	H	H	B	H	H	B	H	H	H	A	B	B	A	A	B	H	H	B
	A01	4116385	A	H	B	H	A	A	A	H	H	H	H	A	A	A	H	H	A	B	H	H	A	H	A	H	A	A	A	A	B	H	H	B	H	H	B	H	H	H	H	B	B	A	A	B	H	H	B
	A01	4116388	A	H	B	H	A	A	A	H	H	H	H	A	A	A	H	H	A	B	H	H	A	H	A	H	A	A	A	A	B	H	H	B	H	H	B	H	H	H	H	B	B	A	A	B	H	H	B
	A01	4116394	A	H	B	H	A	A	A	H	H	H	H	A	A	A	H	H	A	B	H	H	A	H	A	H	A	A	A	A	B	H	H	B	H	H	B	H	H	H	H	B	B	A	A	B	H	H	B
	A01	4120126	A	H	B	H	A	A	A	H	H	H	H	A	A	A	H	H	A	B	H	H	A	H	A	H	A	A	A	A	B	H	H	B	B	H	B	H	H	H	H	B	B	A	A	B	H	H	B
	A01	4120151	A	H	B	H	A	A	A	H	H	H	H	A	A	A	H	H	A	B	H	H	A	H	A	H	A	A	A	A	B	H	H	B	B	H	B	H	H	H	H	B	B	A	A	B	H	H	B
	A01	4218728	A	H	B	H	A	A	A	H	H	H	H	A	A	A	B	H	A	B	H	H	A	H	A	H	A	A	A	A	B	H	H	B	H	H	B	H	H	H	H	B	B	A	A	B	H	H	B
	A01	4223068	A	H	B	H	A	A	A	H	H	H	H	A	A	A	B	H	A	B	H	H	A	H	A	H	A	A	A	A	B	H	H	B	H	H	B	H	H	H	H	B	B	A	A	B	H	H	B
	A01	4262013	A	H	H	H	A	A	A	A	H	H	H	A	A	A	B	H	A	H	A	H	A	H	A	H	A	A	A	A	H	H	H	B	H	H	H	H	H	H	H	B	B	A	A	B	H	H	H
	A01	4262018	A	H	H	H	A	A	A	A	H	H	H	A	A	A	B	H	A	H	A	H	A	H	A	H	A	A	A	A	H	H	H	B	H	H	H	H	H	H	H	B	B	A	A	H	H	H	H
	A01	4262047	A	H	H	H	A	A	A	A	H	H	H	A	A	A	B	H	A	H	H	H	A	H	A	H	A	A	A	A	H	H	H	B	H	H	H	H	H	H	H	B	B	A	A	H	H	H	H
	A01	4352821	A	H	B	H	A	A	A	H	H	H	H	A	A	A	B	H	A	B	H	H	A	H	A	H	A	A	A	A	B	H	H	B	H	H	B	H	H	H	H	B	B	A	A	B	H	H	B
	A01	4352831	A	H	B	H	A	A	A	H	H	H	H	A	A	A	B	H	A	B	H	H	A	H	A	H	A	A	A	A	B	H	H	B	H	H	B	H	H	H	H	B	B	A	A	B	H	H	B
	A01	4582163	A	H	B	H	A	A	A	A	H	H	H	A	A	A	B	H	A	B	A	H	A	H	A	H	A	A	A	A	B	H	H	B	H	H	B	A	H	H	H	B	B	A	A	B	H	B	B
	A01	4582176	A	H	B	H	A	A	A	A	H	H	H	A	A	A	B	H	A	B	A	H	A	H	A	H	A	A	A	A	B	H	H	B	H	H	B	A	H	H	H	B	B	A	A	B	H	B	B
	A01	4642596	A	H	B	H	A	A	A	A	H	H	H	A	A	A	B	H	A	B	A	H	A	H	A	H	A	A	A	A	B	H	H	B	H	H	B	A	H	H	H	B	B	A	A	B	H	H	B
	A01	4642615	A	H	B	H	A	A	A	A	H	H	H	A	A	A	B	H	A	B	A	H	A	H	A	H	A	A	A	A	B	H	H	B	H	H	B	A	H	H	H	B	B	A	A	B	H	H	B
	A01	4665892	A	H	B	H	A	A	A	A	H	H	H	A	A	A	B	H	A	B	A	H	A	H	A	H	A	A	A	A	B	H	H	B	H	H	B	H	H	H	H	B	B	A	A	B	H	H	B
	A01	4666100	A	H	B	H	A	A	A	A	H	H	H	A	A	A	B	H	A	B	A	H	A	H	A	H	A	A	A	A	B	H	H	B	H	H	B	H	H	H	H	B	B	A	A	B	H	H	B
	A01	4780671	A	H	B	H	A	A	A	A	H	H	H	A	A	A	B	H	A	B	A	H	A	H	A	H	A	A	A	A	B	H	H	B	H	H	B	H	H	H	H	B	B	A	A	B	H	H	B
	A01	4780818	A	H	B	H	A	A	A	A	H	H	H	A	A	A	B	H	A	B	A	H	A	H	A	H	A	A	A	A	B	H	H	B	H	H	B	H	H	H	H	B	B	A	A	B	H	H	B
	A01	4819812	A	H	B	H	A	A	A	A	H	H	H	A	A	A	B	H	A	B	A	H	A	H	A	H	A	A	A	A	B	H	H	B	H	H	B	H	H	H	H	B	B	A	A	B	H	H	B
	A01	4873298	A	H	B	A	A	A	A	A	H	H	H	A	A	A	B	H	A	B	A	H	A	H	A	H	A	A	A	A	B	H	H	B	H	H	B	H	H	H	H	B	B	A	A	B	H	H	B
	A01	4882547	A	H	B	A	A	A	A	A	H	H	H	A	A	A	B	H	A	B	A	H	A	H	A	H	A	A	A	A	B	H	H	B	H	H	B	H	H	H	H	B	B	A	A	B	H	H	B
	A01	4882904	A	H	B	A	A	A	A	A	H	H	H	A	A	A	B	H	A	B	A	H	A	H	A	H	A	A	A	A	B	H	H	B	H	H	B	H	H	H	H	B	B	A	A	B	H	H	B
	A01	4882933	A	H	B	A	A	A	A	A	H	H	H	A	A	A	B	H	A	B	A	H	A	H	A	H	A	A	A	A	B	H	H	B	H	H	B	H	H	H	H	B	B	A	A	B	H	H	B
	A01	5007373	A	H	B	A	A	A	A	A	H	H	H	A	A	A	B	H	A	B	A	H	A	H	A	H	A	A	A	A	B	H	H	H	H	H	B	H	H	H	H	B	B	A	A	B	H	H	B
	A01	5007380	A	H	B	A	A	A	A	A	H	H	H	A	A	A	B	H	A	B	A	H	A	H	A	H	A	A	A	A	B	H	H	H	H	H	B	H	H	H	H	B	B	A	A	B	H	H	B
	A01	5007634	A	H	B	A	A	A	A	A	H	H	H	A	A	A	B	H	A	B	A	H	A	H	A	H	A	A	A	A	B	H	H	H	H	H	B	H	H	H	H	B	B	A	A	B	H	H	B
	A01	5017318	A	H	B	A	A	A	A	A	H	H	H	A	A	A	B	H	A	B	A	H	H	H	A	H	A	A	A	A	H	H	H	B	H	H	B	H	H	H	H	B	B	A	A	B	H	H	B
	A01	5017695	A	H	B	A	A	A	A	A	H	H	H	A	A	H	B	H	A	B	A	H	A	H	A	H	A	A	A	A	H	H	H	B	H	H	B	H	H	H	H	B	B	A	A	B	H	H	B
	A01	5017863	A	H	B	A	A	A	A	A	H	B	H	A	A	A	B	H	A	B	A	H	A	H	A	H	A	A	A	A	H	H	H	B	H	H	B	H	H	H	H	B	B	A	A	B	H	H	B
	A01	5035212	A	H	B	A	A	A	A	A	H	H	H	A	A	A	B	H	A	B	A	H	A	H	A	H	A	A	A	A	H	H	H	B	H	H	B	H	H	H	H	B	B	A	A	B	H	H	B
	A01	5035233	A	H	B	A	A	A	A	A	H	H	H	A	A	A	B	H	A	B	A	H	A	H	A	H	A	A	A	A	H	H	H	B	H	H	B	H	H	H	H	B	B	A	A	B	H	H	B
	A01	5057334	A	H	B	A	A	A	A	A	H	H	H	A	A	A	B	H	A	B	A	H	A	H	A	H	A	A	A	A	H	H	H	B	H	H	B	H	H	H	H	B	B	A	A	B	H	H	B
	A01	5254335	A	H	B	A	A	A	A	A	H	H	H	A	A	A	B	H	A	B	A	H	A	H	A	H	A	A	A	A	H	H	H	H	H	H	B	H	H	H	H	B	B	A	A	B	H	H	B
	A01	5254366	A	H	B	A	A	A	A	A	H	H	H	A	A	A	B	H	A	B	A	H	A	H	A	H	A	A	A	A	H	H	H	H	H	H	B	H	H	H	H	B	B	A	A	B	H	H	B
	A01	5254684	A	H	B	A	A	A	A	A	H	H	H	A	A	A	B	H	A	B	A	H	A	H	A	H	A	A	A	A	H	H	H	B	H	H	B	H	H	H	H	B	B	A	A	B	H	H	B
	A01	5255830	A	H	B	A	A	A	A	A	H	H	H	A	A	A	B	H	A	B	A	H	A	H	A	H	A	A	A	A	H	H	H	B	H	H	B	H	H	H	H	B	B	A	A	B	H	H	B
	A01	5268959	A	H	B	A	A	A	A	A	H	H	H	A	A	A	B	H	A	B	A	H	A	H	A	H	A	A	A	A	H	H	H	B	H	H	B	H	H	H	H	B	B	A	A	B	H	H	B
	A01	5268965	A	H	B	A	A	A	A	A	H	H	H	A	A	A	B	H	A	B	A	H	A	H	A	H	A	A	A	A	H	H	H	H	H	H	B	H	H	H	H	B	B	A	A	B	H	H	B
	A01	5300414	A	H	B	A	A	A	A	A	H	H	H	A	A	A	B	H	A	B	A	B	A	H	A	H	A	A	A	A	H	H	H	B	H	H	B	H	H	H	H	B	B	A	A	B	H	H	B
	A01	5320582	A	H	B	A	A	A	A	A	H	H	H	A	A	A	B	H	A	B	A	B	A	H	A	H	A	A	A	A	H	H	H	B	H	H	B	H	H	H	H	B	B	A	A	B	H	H	B
	A01	5331743	A	H	B	A	A	A	A	A	H	H	H	A	A	A	B	H	A	B	A	B	A	H	A	H	A	A	A	A	H	H	H	B	H	H	B	H	H	H	H	B	B	A	A	B	H	H	B
	A01	5387932	A	H	B	A	A	A	A	A	H	H	H	A	A	A	B	H	A	B	A	H	A	H	A	H	A	A	A	A	H	H	H	B	H	H	B	H	H	H	H	B	B	A	A	B	H	H	B
	A01	5441710	A	H	B	A	A	A	A	A	H	H	H	A	A	A	B	H	A	B	A	H	A	H	A	H	A	A	A	A	H	H	H	B	H	H	B	H	H	H	H	B	B	A	A	B	H	H	B
	A01	5441713	A	H	B	A	A	A	A	A	H	H	H	A	A	A	B	H	A	B	A	H	A	H	A	H	A	A	A	A	H	H	H	B	H	H	B	H	H	H	H	B	B	A	A	B	H	H	B
	A01	5441722	A	H	B	A	A	A	A	A	H	H	H	A	A	A	B	H	A	B	A	H	A	H	A	H	A	A	A	A	H	H	H	B	H	H	B	H	H	H	H	B	B	A	A	B	H	H	B
	A01	5441751	A	H	B	A	A	A	A	A	H	H	H	A	A	A	B	H	A	B	A	H	A	H	A	H	A	A	A	A	H	H	H	B	H	H	B	H	H	H	H	B	B	A	A	B	H	H	B
	A01	5455073	A	H	B	A	A	A	A	A	H	H	H	A	A	A	B	H	A	B	A	H	A	H	A	H	A	A	A	A	H	H	H	B	H	H	B	H	H	H	H	B	B	A	A	B	H	H	B
	A01	5489879	A	H	B	A	A	A	A	A	H	H	H	A	A	A	B	H	A	B	A	H	A	H	A	H	A	A	A	A	H	H	H	B	H	H	B	H	H	H	H	B	B	A	A	B	H	H	B
	A01	5489996	A	H	B	A	A	A	A	A	H	H	H	A	A	A	B	H	A	B	A	H	A	H	A	H	A	A	A	A	H	H	H	B	H	H	B	H	H	H	H	B	B	A	A	B	H	H	B
	A01	5490011	A	H	B	A	A	A	A	A	H	H	H	A	A	A	B	H	A	B	A	H	A	H	A	H	A	A	A	A	H	H	H	B	H	H	B	H	H	H	H	B	B	A	A	B	H	H	B
	A01	5490012	A	H	B	A	A	A	A	A	H	H	H	A	A	A	B	H	A	B	A	H	A	H	A	H	A	A	A	A	H	H	H	B	H	H	B	H	H	H	H	B	B	A	A	B	H	H	B
	A01	5577753	A	H	B	A	A	A	A	A	H	H	H	A	A	A	B	H	A	B	A	H	A	H	A	H	A	A	A	A	H	H	H	B	H	H	B	H	H	H	H	B	B	A	A	B	H	H	B
	A01	5578206	A	H	B	A	A	A	A	A	H	H	H	A	A	A	B	H	A	B	A	H	A	H	A	H	A	A	A	A	H	H	H	B	H	H	B	H	H	H	H	B	B	A	A	B	H	H	B
	A01	5578235	A	H	B	A	A	A	A	A	H	H	H	A	A	A	B	H	A	B	A	H	A	H	A	H	A	A	A	A	H	H	H	B	H	H	B	H	H	H	H	B	B	A	A	B	H	H	B
	A01	5612599	A	H	B	A	A	A	A	A	H	H	H	A	A	A	B	H	A	B	A	H	A	H	A	H	A	A	A	H	H	H	H	B	H	H	B	H	H	H	H	B	B	A	A	B	H	H	B
	A01	5616000	A	H	B	A	A	A	A	A	H	H	H	A	A	A	B	H	A	B	A	H	A	H	A	H	A	A	A	B	H	H	H	B	H	H	B	H	H	H	H	B	B	A	A	B	H	H	B
	A01	6082520	A	H	B	A	A	H	A	A	H	A	H	A	A	A	B	H	A	B	A	H	A	H	A	H	A	A	A	H	H	H	H	B	H	H	B	H	H	H	H	B	B	A	A	H	H	H	B
	A01	6082551	A	H	B	A	A	H	A	A	H	A	H	A	A	A	B	H	A	B	A	H	A	H	A	H	A	A	A	H	H	H	H	B	H	H	B	H	H	H	H	B	B	A	A	H	H	H	B
	A01	6082561	A	H	B	A	A	H	A	A	H	A	H	A	A	A	B	H	A	B	A	H	A	H	A	H	A	A	A	H	H	H	H	B	H	H	B	H	H	H	H	B	B	A	A	H	H	H	B
	A01	6082577	A	H	B	A	A	H	A	A	H	A	H	A	A	A	B	H	A	B	A	H	A	H	A	H	A	A	A	H	H	H	H	B	H	H	B	H	H	H	H	B	B	A	A	H	H	H	B
	A01	6181173	A	H	B	A	A	H	A	A	H	A	H	A	A	A	B	H	A	B	A	H	A	H	A	H	A	A	A	H	H	H	H	B	H	H	B	H	H	H	H	B	B	A	A	H	H	H	B
	A01	6231508	A	H	B	A	A	H	A	A	H	A	H	A	A	A	B	H	A	B	A	H	A	H	A	H	A	A	A	H	H	H	H	B	H	H	B	H	H	H	H	B	B	A	A	H	H	H	B
	A01	6326957	A	H	B	A	A	H	A	A	H	A	H	A	A	A	B	H	A	B	A	H	A	H	A	H	A	A	A	H	H	H	H	B	H	H	B	H	H	H	H	B	B	A	A	H	H	H	B
	A01	6340711	A	A	B	A	A	H	A	A	H	A	H	A	A	A	H	H	A	H	A	H	A	A	A	A	A	A	A	H	H	A	H	B	H	A	B	H	H	H	H	H	B	A	A	H	H	A	B
	A01	6340725	A	A	B	A	A	H	A	A	H	A	H	A	A	A	H	H	A	B	A	H	A	A	A	A	A	A	A	H	H	A	H	B	H	A	B	H	H	H	H	H	B	A	A	H	H	H	B
	A01	6340742	A	A	B	A	A	H	A	A	H	A	H	A	A	A	H	H	A	H	A	H	A	A	A	A	A	A	A	H	H	A	H	B	H	A	B	H	H	A	H	H	H	A	A	H	H	A	B
	A01	6340983	A	A	B	A	A	H	A	A	A	A	H	A	A	A	H	H	A	B	A	H	A	A	A	A	A	A	A	H	H	A	H	B	H	A	B	H	H	H	H	H	B	A	A	H	H	A	B
	A01	6341027	A	A	B	A	A	H	A	A	H	A	H	A	A	A	H	H	A	H	A	H	A	A	A	A	A	A	A	H	H	A	H	B	H	A	B	H	H	H	H	H	B	A	A	H	H	A	B
	A01	6341030	A	A	B	A	A	H	A	A	H	A	H	A	A	A	H	H	A	H	A	H	A	A	A	A	A	A	A	H	H	A	H	B	H	A	B	H	H	H	H	H	B	A	A	H	H	A	B
	A01	8286091	A	H	B	A	A	H	H	H	A	A	H	A	A	A	B	H	A	H	A	H	A	B	A	B	A	H	A	H	H	H	H	B	H	H	B	H	H	H	H	B	B	A	A	H	H	H	B
	A01	8286102	A	H	B	A	A	H	H	H	A	A	H	A	A	A	B	H	A	H	A	H	A	B	A	B	A	H	A	H	H	H	H	B	H	H	B	H	H	H	H	B	B	A	A	H	H	H	B
	A01	8286153	A	H	B	A	A	H	H	H	A	A	H	A	A	A	B	H	A	H	A	H	A	B	A	B	A	H	A	H	H	H	H	B	H	H	B	H	H	H	H	B	B	A	A	H	H	H	B
	A01	8286188	A	H	B	A	A	H	H	H	A	A	H	A	A	A	B	H	A	H	A	H	A	B	A	B	A	H	A	H	H	H	H	B	H	H	B	H	H	H	H	B	B	A	A	H	H	H	B
	A01	8332262	A	H	B	A	A	H	H	A	A	A	H	A	A	A	B	H	A	H	A	H	A	B	H	H	A	H	A	H	H	H	H	B	H	H	B	H	H	H	H	B	B	A	A	H	H	H	B
	A01	8332263	A	H	B	A	A	H	H	A	A	A	H	A	A	A	B	H	A	H	A	H	A	B	H	H	A	H	A	H	H	H	H	B	H	H	B	H	H	H	H	B	B	A	A	H	H	H	B
	A01	8839948	A	B	H	H	B	H	B	A	H	H	B	H	H	A	A	B	A	A	B	H	A	H	A	H	H	H	B	H	B	B	A	A	H	A	H	B	H	B	A	B	B	H	B	B	A	H	H
	A01	8840094	A	B	H	H	B	H	B	A	H	H	B	H	H	A	A	B	A	A	B	H	A	H	A	H	H	H	B	H	B	B	A	A	H	A	H	B	H	B	A	B	B	H	B	B	A	H	H
	A01	8840820	A	B	H	H	B	H	B	H	H	H	B	H	H	A	A	B	A	A	B	H	A	H	A	H	H	H	B	H	B	B	H	A	H	A	H	B	H	B	A	H	B	H	B	B	A	H	H
	A01	8841223	A	B	H	H	B	H	B	A	H	H	B	H	H	A	A	B	A	A	B	H	A	H	A	H	H	H	B	H	B	B	H	A	H	A	H	B	H	B	A	H	B	H	B	B	A	H	H
	A01	8913981	A	B	H	H	B	B	B	H	H	H	B	H	H	A	A	B	A	A	B	H	A	H	A	H	H	H	B	H	B	B	A	A	H	A	H	B	H	B	A	B	B	H	B	B	A	H	H
	A01	8963562	A	B	A	A	A	H	B	H	B	H	B	H	H	A	A	H	A	H	H	B	A	H	A	H	H	H	B	A	H	H	A	A	A	A	B	H	H	A	H	B	A	H	H	H	A	A	B
	A01	8963579	A	B	A	A	A	H	B	H	B	H	B	H	H	A	A	H	A	H	H	B	A	H	A	H	H	H	B	A	H	H	A	A	A	A	B	H	H	A	H	B	A	H	H	H	A	A	B
	A01	8963596	A	B	A	A	A	H	B	H	B	H	B	H	H	A	A	H	A	H	H	B	A	H	A	H	H	H	B	A	H	H	A	A	A	A	B	H	H	A	H	B	A	H	H	H	A	A	B
	A01	9048292	A	B	A	A	A	B	B	H	B	H	B	H	H	A	A	H	A	H	H	B	A	H	A	H	H	H	B	A	H	H	A	A	A	A	B	H	H	A	H	B	A	H	H	H	A	A	H
	A01	9048350	A	B	A	A	A	B	B	H	B	H	B	H	H	A	A	H	A	H	H	B	A	H	A	H	H	H	B	A	H	H	A	A	A	A	B	H	H	A	H	B	A	H	H	H	A	A	H
	A01	9048362	A	B	A	A	A	B	B	H	B	H	B	H	H	A	A	H	A	H	H	B	A	H	A	H	H	H	B	A	H	H	A	A	A	A	B	H	H	A	H	B	A	H	H	H	A	A	H
	A01	9048364	A	B	A	A	A	B	B	H	B	H	B	H	H	A	A	H	A	H	H	B	A	H	A	H	H	H	B	A	H	H	A	A	A	A	B	H	H	A	H	B	A	H	H	H	A	A	H
	A01	9261166	A	H	B	A	A	H	H	A	A	A	H	A	A	A	B	H	A	H	A	H	A	B	A	B	A	H	A	H	H	H	H	B	H	H	B	H	H	H	H	B	B	A	A	H	H	H	B
	A01	9296843	A	H	B	A	A	H	H	A	A	A	H	A	A	A	B	A	A	H	A	H	A	B	A	H	A	H	A	A	H	H	H	B	H	A	B	H	H	H	H	H	B	A	A	H	A	H	B
	A01	9297024	A	H	B	A	A	H	H	A	A	A	H	A	A	A	B	H	A	H	A	H	A	B	A	B	A	H	A	H	H	H	H	B	H	H	B	H	H	H	H	B	B	A	A	H	H	H	B
	A01	9297031	A	H	B	A	A	H	H	A	A	A	H	A	A	A	B	H	A	H	A	H	A	B	A	B	A	H	A	H	H	H	H	B	H	H	B	H	H	H	H	B	B	A	A	H	H	H	B
	A01	9303159	A	H	B	A	A	H	H	A	A	A	H	A	A	A	B	H	A	H	A	H	A	B	A	B	A	H	A	H	H	H	H	B	H	H	B	H	H	H	H	B	B	A	A	H	H	H	B
	A01	9303170	A	H	B	A	A	H	H	A	A	A	H	A	A	A	B	H	A	H	A	H	A	B	A	B	A	H	A	H	H	H	H	B	H	H	B	H	H	H	H	B	B	A	A	H	H	H	B
	A01	9347811	A	B	H	A	A	H	H	H	A	A	B	A	A	A	B	A	A	A	A	B	A	B	A	B	A	H	A	B	B	H	H	B	H	B	H	B	B	H	H	H	B	A	A	H	B	H	H
	A01	9348107	A	B	H	A	A	H	H	H	A	A	B	A	A	A	B	H	A	A	A	B	A	B	A	B	A	H	A	B	B	H	H	B	H	B	H	H	B	H	H	H	B	A	A	H	B	H	H
	A01	9348122	A	B	H	A	A	H	H	H	A	A	B	A	A	A	B	A	A	A	A	B	A	B	A	B	A	H	A	B	B	H	H	B	H	B	H	B	B	H	H	H	B	A	A	H	B	H	H
	A01	9348141	A	B	H	A	A	H	H	H	A	A	B	A	A	A	B	A	A	A	A	B	A	B	A	B	A	H	A	B	B	H	H	B	H	B	H	B	B	H	H	H	B	A	A	H	B	H	H
	A01	9370875	A	H	B	A	A	H	H	A	A	A	H	A	A	A	B	H	A	H	A	H	A	B	A	B	A	H	A	H	H	H	H	B	H	H	B	H	H	H	H	B	B	A	A	H	H	H	B
	A01	9415737	A	H	B	A	A	H	H	A	A	A	H	A	A	A	B	H	A	H	A	H	A	B	A	B	A	H	A	H	H	H	H	B	H	H	B	H	H	H	H	B	B	A	A	H	H	H	B
	A01	9415744	A	H	B	A	A	H	H	A	A	A	H	A	A	A	B	H	A	H	A	H	A	B	A	B	A	H	A	H	H	H	H	B	H	H	B	H	H	H	H	B	B	A	A	H	H	H	B
	A01	9415752	A	H	B	A	A	H	H	A	A	A	H	A	A	A	B	H	A	H	A	H	A	B	A	B	A	H	A	H	H	H	H	B	H	H	B	H	H	H	H	B	B	A	A	H	H	H	B
	A01	9415757	A	H	B	A	A	H	H	A	A	A	H	A	A	A	B	H	A	H	A	H	A	B	A	B	A	H	A	H	H	H	H	B	H	H	B	H	H	H	H	B	B	A	A	H	H	H	B
	A01	9415780	A	H	B	A	A	H	H	A	A	A	H	A	A	A	B	H	A	H	A	H	A	B	A	B	A	H	A	H	H	H	H	B	H	H	B	H	H	H	H	B	B	A	A	H	H	H	B
	A01	9415783	A	H	B	A	A	H	H	A	A	A	H	A	A	A	B	H	A	H	A	H	A	B	A	B	A	H	A	H	H	H	H	B	H	H	B	H	H	H	H	B	B	A	A	H	H	H	B
	A01	9420815	A	H	B	A	A	H	H	A	A	A	H	A	A	A	B	H	A	H	A	H	A	B	A	B	A	H	A	H	H	H	H	B	H	H	B	H	H	H	H	B	B	A	A	H	H	H	B
	A01	9432554	A	H	B	A	A	H	H	A	A	A	H	A	A	A	B	H	A	H	A	H	A	B	A	B	A	H	A	H	H	H	H	B	H	H	B	H	H	H	H	B	B	A	A	H	H	H	B
	A01	9432555	A	H	B	A	A	H	H	A	A	A	H	A	A	A	B	H	A	H	A	H	A	B	A	B	A	H	A	H	H	H	H	B	H	H	B	H	H	H	H	B	B	A	A	H	H	H	B
	A01	9432577	A	H	B	A	A	H	H	A	A	A	H	A	A	A	B	H	A	H	A	H	A	B	A	B	A	H	A	H	H	H	H	B	H	H	B	H	H	H	H	B	B	A	A	H	H	H	B
	A01	9432587	A	H	B	A	A	H	H	A	A	A	H	A	A	A	B	H	A	H	A	H	A	B	A	B	A	H	A	H	H	H	H	B	H	H	B	H	H	H	H	B	B	A	A	H	H	H	B
	A01	9432593	A	H	B	A	A	H	H	A	A	A	H	A	A	A	B	H	A	H	A	H	A	B	A	B	A	H	A	H	H	H	H	B	H	H	B	H	H	H	H	B	B	A	A	H	H	H	B
	A01	9523530	A	H	B	A	A	H	H	A	A	A	H	A	A	A	B	H	A	H	A	H	A	B	A	B	A	H	A	H	H	H	H	B	H	H	B	H	H	H	H	B	B	A	A	H	H	H	B
	A01	9523531	A	H	B	A	A	H	H	A	A	A	H	A	A	A	B	H	A	H	A	H	A	B	A	B	A	H	A	H	H	H	H	B	H	H	B	H	H	H	H	B	B	A	A	H	H	H	B
	A01	9595792	A	H	B	A	A	H	H	A	A	A	H	A	A	A	B	H	A	H	A	H	A	B	A	B	A	H	A	H	H	H	H	B	H	H	B	H	H	H	H	B	B	A	A	H	H	H	B
	A01	9595793	A	H	B	A	A	H	H	A	A	A	H	A	A	A	B	H	A	H	A	H	A	B	A	B	A	H	A	H	H	H	H	B	H	H	B	H	H	H	H	B	B	A	A	H	H	H	B
	A01	9595804	A	H	B	A	A	H	H	A	A	A	H	A	A	A	B	H	A	H	A	H	A	B	A	B	A	H	A	H	H	H	H	B	H	H	B	H	H	H	H	B	B	A	A	H	H	H	B
	A01	9595814	A	H	B	A	A	H	H	A	A	A	H	A	A	A	B	H	A	H	A	H	A	B	A	B	A	H	A	H	H	H	H	B	H	H	B	H	H	H	H	B	B	A	A	H	H	H	B
	A01	9598706	A	H	B	H	H	H	H	H	H	H	H	H	H	H	H	H	A	H	H	H	A	H	H	B	H	H	H	H	H	H	H	B	H	H	B	H	H	H	H	B	B	H	H	H	H	H	B
	A01	9598748	A	H	B	A	A	H	H	A	A	A	H	A	A	A	B	H	A	H	A	H	A	B	A	B	A	H	A	H	H	H	H	B	H	H	B	H	H	H	H	B	B	A	A	H	H	H	B
	A01	9617924	A	H	B	A	A	H	H	H	A	A	H	A	A	A	B	H	A	H	A	H	A	B	A	B	A	H	A	H	H	H	H	B	H	H	B	H	H	H	H	B	B	A	A	H	H	H	B
	A01	9641062	A	H	B	A	H	H	H	A	A	A	H	A	A	A	B	H	A	A	A	H	A	B	A	B	A	H	A	H	H	H	H	B	B	H	B	H	H	H	H	B	B	A	A	H	H	H	B
	A01	9641066	A	H	B	A	H	H	H	A	A	A	H	A	A	A	B	H	A	A	A	H	A	B	A	B	A	H	A	H	H	H	H	B	B	H	B	H	H	H	H	B	B	A	A	H	H	H	B
	A01	9952950	A	H	B	A	A	H	H	A	A	A	H	A	A	A	B	H	A	H	A	H	A	B	A	B	A	H	A	H	H	H	H	B	H	H	B	H	H	H	H	B	B	A	A	H	H	H	B
	A01	9992330	A	H	B	A	A	H	H	A	A	A	H	A	A	A	B	H	A	H	A	H	H	B	A	B	A	H	A	H	H	H	H	B	H	H	B	H	H	H	H	B	B	A	A	H	H	H	B
	A01	10097132	A	H	B	A	A	H	H	A	A	A	H	A	A	A	B	H	A	H	A	H	A	B	A	B	A	H	A	H	H	H	H	B	H	H	B	H	H	H	H	B	B	A	A	H	H	H	B
	A01	10104046	A	H	B	A	A	H	H	A	A	A	H	A	A	A	B	H	A	H	A	H	A	B	A	B	A	H	A	H	H	H	H	B	H	H	B	H	H	H	H	B	B	A	A	H	H	H	B
	A01	10104180	A	H	B	A	A	H	H	A	A	A	H	A	A	A	B	H	A	H	A	H	A	B	A	B	A	H	A	H	H	H	H	B	H	H	B	H	H	H	H	B	B	A	A	H	H	H	B
	A01	10128607	A	H	B	A	A	H	H	A	A	A	H	A	A	A	B	H	A	H	A	H	A	B	A	B	A	H	A	H	H	H	H	B	H	H	B	H	H	H	H	B	B	A	A	H	H	H	B
	A01	10128608	A	H	B	A	A	H	H	A	A	A	H	A	A	A	B	H	A	H	A	H	A	B	A	B	A	H	A	H	H	H	H	B	H	H	B	H	H	H	H	B	B	A	A	H	H	H	B
	A01	10128631	A	H	B	A	A	H	H	A	A	A	H	A	A	A	B	H	A	H	A	H	A	B	A	B	A	H	A	H	H	H	H	B	H	H	B	H	H	H	H	B	B	A	A	H	H	H	B
	A01	10128841	A	H	B	A	A	H	H	A	A	A	H	A	A	A	B	H	A	H	A	H	A	B	A	B	A	H	A	H	H	H	H	B	H	H	B	H	H	H	H	B	B	A	A	H	H	H	B
	A01	10128889	A	H	B	A	A	H	H	A	A	A	H	A	A	A	B	H	A	H	A	H	A	B	A	B	A	H	A	H	H	H	H	B	H	H	B	H	H	H	H	B	B	A	A	H	H	H	B
	A01	10128892	A	H	B	A	A	H	H	A	A	A	H	A	A	A	B	H	A	H	A	H	A	B	A	B	A	H	A	H	H	H	H	B	H	H	B	H	H	H	H	B	B	A	A	H	H	H	B
	A01	10448805	A	H	B	A	A	H	H	A	A	A	H	A	A	A	B	H	A	H	A	H	A	B	A	B	A	H	A	H	H	H	H	B	H	H	B	H	H	H	H	B	B	A	A	H	H	H	B
	A01	10448814	A	H	B	A	A	H	H	A	A	A	H	A	A	A	B	H	A	H	A	H	A	B	A	B	A	H	A	H	H	H	H	B	H	H	B	H	H	H	H	B	B	A	A	H	H	H	B
	A01	10448818	A	H	B	A	A	H	H	A	A	A	H	A	A	A	B	H	A	H	A	H	A	B	A	B	A	H	A	H	H	H	H	B	H	H	B	B	H	H	H	B	B	A	A	H	H	H	B
	A01	10448835	A	H	B	A	A	H	H	A	A	A	H	A	A	A	B	H	A	H	A	H	A	B	A	B	A	H	A	H	H	H	H	B	H	H	B	H	H	H	H	B	B	A	A	H	H	H	B
	A01	10449198	A	H	B	A	A	H	H	A	A	A	H	A	A	A	B	H	A	H	A	H	A	B	A	B	A	H	A	H	H	H	H	B	H	H	B	H	H	H	H	B	B	A	A	H	H	H	B
	A01	10449252	A	H	B	A	A	H	H	A	A	A	H	A	A	A	B	H	A	H	A	H	A	B	A	B	A	H	A	H	H	H	H	B	H	H	B	H	H	H	H	B	B	A	A	H	H	H	B
	A01	10449261	A	H	B	A	A	H	H	A	A	A	H	A	A	A	B	H	A	H	A	H	A	B	A	B	A	H	A	H	H	H	H	B	H	H	B	H	H	H	H	B	B	A	A	H	H	H	B
	A01	10449276	A	H	B	A	A	H	H	A	A	A	H	A	A	A	B	H	A	H	A	H	A	B	A	B	A	H	A	H	H	H	H	B	H	H	B	H	H	H	H	B	B	A	A	H	H	H	B
	A01	10454776	A	H	B	A	A	H	H	A	A	A	H	A	A	A	B	B	A	H	A	H	A	B	A	B	A	H	A	H	H	H	H	B	H	H	B	H	H	H	H	B	B	A	A	H	H	H	B
	A01	10995755	A	H	B	A	A	H	H	A	A	A	H	A	A	A	B	H	A	H	A	H	A	B	A	B	A	H	A	H	H	H	H	B	H	H	B	H	H	H	H	B	B	A	A	H	H	H	B
	A01	11163716	A	H	B	A	A	H	H	A	A	A	H	A	H	A	B	H	A	H	A	H	A	B	A	B	A	H	A	H	H	H	H	B	H	H	B	H	H	H	H	B	B	A	A	H	H	H	B
	A01	11163725	A	H	B	A	A	H	H	A	A	A	H	A	H	A	B	H	A	H	A	H	A	B	A	B	A	H	A	H	H	H	H	B	H	H	B	H	H	H	H	B	B	A	A	H	H	H	B
	A01	11163734	A	H	B	A	A	H	H	A	A	A	H	A	H	A	B	H	A	H	A	H	A	B	A	B	A	H	A	H	H	H	H	B	H	H	B	H	H	H	H	B	B	A	A	H	H	H	B
	A01	11163752	A	H	B	A	A	H	H	A	A	A	H	A	H	A	B	H	A	H	A	H	A	B	A	B	A	H	A	H	H	H	H	B	H	H	B	H	H	H	H	B	B	A	A	H	H	H	B
	A01	11163761	A	H	B	A	A	H	H	A	A	A	H	A	H	A	B	H	A	H	A	H	A	B	A	B	A	H	A	H	H	H	H	B	H	H	B	H	H	H	H	B	B	A	A	H	H	H	B
	A01	11163794	A	H	B	A	A	H	H	A	A	A	H	A	H	A	B	H	A	H	A	H	A	B	A	B	A	H	A	H	H	H	H	B	H	H	B	H	H	H	H	B	B	A	A	H	H	H	B
	A01	11230356	A	H	B	A	A	H	H	A	A	A	H	A	H	A	B	H	A	H	A	H	A	B	A	B	A	H	A	H	H	H	H	B	H	H	B	H	H	H	H	B	B	A	A	H	H	H	B
	A01	11230424	A	H	B	A	A	H	H	A	A	A	H	A	H	A	B	H	A	H	A	H	A	B	A	B	A	H	A	H	H	H	H	B	H	H	B	H	H	H	H	B	B	A	A	H	H	H	B
	A01	11230493	A	H	B	A	A	H	H	A	A	A	H	A	H	A	B	H	A	H	A	H	A	B	A	B	A	H	A	H	H	H	H	B	H	H	B	H	H	H	H	B	B	A	A	H	H	H	B
	A01	11230503	A	H	B	A	A	H	H	A	A	A	H	A	H	A	B	H	A	H	A	H	A	B	A	B	A	H	A	H	H	H	H	B	H	H	B	H	H	H	H	B	B	A	A	H	H	H	B
	A01	11230528	A	H	B	A	A	H	H	A	A	A	H	A	H	A	B	H	A	H	A	H	A	B	A	B	A	H	A	H	H	H	H	B	H	H	B	H	H	H	H	B	B	A	A	H	H	H	B
	A01	11230534	A	H	B	A	A	H	H	A	A	A	H	A	H	A	B	H	A	H	A	H	A	B	A	B	A	H	A	H	H	H	H	B	H	H	B	H	H	H	H	B	B	A	A	H	H	H	B
	A01	11374588	A	H	B	A	A	H	H	A	A	A	H	A	H	A	B	H	A	H	A	H	A	B	A	H	A	H	A	H	H	H	H	B	H	H	B	H	H	H	H	B	B	A	A	H	H	H	B
	A01	11374794	A	H	B	A	A	H	H	A	A	A	H	A	H	A	B	H	A	H	A	H	A	B	A	H	A	H	A	H	H	H	H	B	H	H	B	H	H	H	H	B	B	A	A	H	H	H	B
	A01	11642485	A	B	B	B	A	A	B	A	B	B	A	B	A	B	B	A	B	A	B	A	B	A	A	A	A	A	A	A	A	B	A	B	A	A	A	A	A	B	A	A	A	B	A	A	B	A	A
	A01	11892723	A	H	B	A	A	H	H	A	A	A	H	A	H	A	B	H	A	H	A	H	A	B	A	B	A	H	A	H	H	H	H	B	H	H	B	H	H	H	H	B	B	A	A	H	H	H	B
	A01	12085904	A	H	B	A	A	H	H	A	A	A	H	A	H	A	B	H	A	H	A	H	A	B	A	B	A	H	A	H	H	H	H	B	H	H	B	H	H	H	H	B	B	A	A	H	H	H	B
	A01	12085921	A	H	B	A	A	H	H	A	A	A	H	A	H	A	B	H	A	H	A	H	A	B	A	B	A	H	A	H	H	H	H	B	H	H	B	H	H	H	H	B	B	A	A	H	H	H	B
	A01	12089246	A	H	B	A	A	H	H	A	A	A	H	A	H	A	B	H	A	H	A	H	A	B	H	B	A	H	A	H	H	H	H	B	H	H	B	H	H	H	H	B	B	A	A	H	H	H	B
	A01	12191181	A	H	B	A	A	H	H	H	A	A	H	A	H	A	B	H	A	H	A	H	A	B	H	B	A	H	A	H	H	H	H	B	H	H	B	H	H	H	H	B	B	A	A	H	H	H	H
	A01	12663572	A	H	B	A	A	H	H	A	A	A	H	A	H	A	B	H	A	H	A	H	A	B	A	B	A	H	A	H	H	H	H	B	H	H	H	H	H	H	H	B	B	A	A	H	H	H	B
	A01	12663808	A	H	B	A	A	H	H	A	A	A	H	A	H	A	B	H	A	H	A	H	A	B	A	H	A	H	A	H	H	H	H	B	H	H	H	H	H	H	H	B	B	A	A	H	H	H	H
	A01	12745731	A	H	B	A	A	H	H	A	A	A	H	A	H	A	B	H	A	H	A	H	A	B	H	B	A	H	A	H	H	H	H	B	H	H	H	H	H	H	H	H	B	A	A	H	H	H	B
	A01	12745768	A	H	B	A	A	H	H	H	A	A	H	A	H	A	B	H	A	H	A	H	A	B	H	B	A	H	A	H	H	H	H	B	H	H	H	H	H	H	H	H	B	A	A	H	H	H	B
	A01	12745871	A	H	B	A	A	H	H	A	A	A	H	A	H	A	B	H	A	H	A	H	A	B	H	B	A	H	A	H	H	H	H	B	H	H	H	H	H	H	H	B	B	A	A	H	H	H	B
	A01	12746023	A	H	B	A	A	H	H	A	A	A	H	A	H	A	B	H	A	H	A	H	A	B	H	B	A	H	A	H	H	H	H	B	H	H	H	H	H	H	H	B	B	A	A	H	H	H	B
	A01	12746030	A	H	B	A	A	H	H	A	A	A	H	A	H	A	B	H	A	H	A	H	A	B	H	B	A	H	A	H	H	H	H	B	H	H	H	H	H	H	H	B	B	A	A	H	H	H	B
	A01	12746038	A	H	B	A	A	H	H	A	A	A	H	A	H	A	B	H	A	H	A	H	A	B	H	B	A	H	A	H	H	H	H	B	H	H	H	H	H	H	H	B	B	A	A	H	H	H	B
	A01	12746092	A	H	B	A	A	H	H	A	A	A	H	A	H	A	B	H	A	H	A	H	A	B	H	B	A	H	A	H	H	H	H	B	H	H	H	H	H	H	H	B	B	A	A	H	H	H	B
	A01	12964365	A	H	B	A	A	H	H	A	A	A	H	A	H	A	H	H	A	H	A	H	A	B	A	B	A	H	A	H	H	H	H	B	H	H	H	H	H	H	H	B	B	A	A	H	H	H	B
	A01	13037362	A	H	B	A	A	B	H	A	A	A	A	A	H	A	B	H	A	H	A	A	A	B	A	B	A	H	A	A	H	H	H	B	H	B	H	H	H	H	H	H	B	A	A	H	H	B	B
	A01	13208668	A	H	B	A	A	H	H	A	A	A	H	A	B	A	B	H	A	H	A	B	A	B	A	B	A	H	A	H	H	H	H	B	H	H	H	H	H	H	H	B	B	A	A	H	H	H	B
	A01	13208676	A	H	B	A	A	H	H	A	A	A	H	A	B	A	B	H	A	H	A	B	A	B	A	B	A	H	A	H	H	H	H	B	H	H	H	H	H	H	H	B	B	A	A	H	H	H	B
	A01	13208959	A	H	B	A	A	H	H	A	A	A	H	A	B	A	B	H	A	H	A	B	A	B	A	B	A	H	A	H	B	H	H	B	H	H	H	H	H	H	H	B	B	A	A	H	H	H	B
	A01	13208986	A	H	B	A	A	H	H	A	A	A	H	A	B	A	B	H	A	H	A	B	A	B	A	B	A	H	A	H	H	H	H	B	H	H	H	H	H	H	H	B	B	A	A	H	H	H	B
	A01	13208992	A	H	B	A	A	H	H	A	A	A	H	A	B	A	B	H	A	H	A	B	A	B	A	B	A	H	A	H	H	H	H	B	H	H	H	H	H	H	H	B	B	A	A	H	H	H	B
	A01	13209001	A	H	B	A	A	H	H	A	A	A	H	A	B	A	B	H	A	H	A	B	A	B	A	B	A	H	A	H	H	H	H	B	H	H	H	H	H	H	H	B	B	A	A	H	H	H	B
	A01	13216127	A	H	B	A	A	H	H	A	A	A	H	A	H	A	B	H	A	H	A	H	A	B	A	B	A	H	A	H	H	H	H	B	H	H	H	H	H	H	H	B	B	A	A	H	H	H	B
	A01	13216169	A	H	B	A	A	H	H	A	A	A	H	A	H	A	B	H	A	H	A	H	A	B	A	B	A	H	A	H	H	H	H	B	H	H	H	H	H	H	H	B	B	A	A	H	H	H	B
	A01	13349859	A	H	B	A	A	H	H	A	A	A	H	A	H	A	B	H	A	H	A	H	A	B	A	B	A	H	A	H	H	H	H	B	H	H	H	H	H	H	H	B	B	A	A	H	H	H	B
	A01	13349871	A	H	B	A	A	H	H	A	A	A	H	A	H	A	B	H	A	H	A	H	A	B	A	B	A	H	A	H	H	H	H	B	H	H	H	H	H	H	H	B	B	A	A	H	H	H	B
	A01	13349938	A	H	B	A	A	H	H	A	A	A	H	A	H	A	B	H	A	H	A	H	A	B	A	B	A	H	A	H	H	H	H	B	H	H	H	H	H	H	H	B	B	A	A	H	H	H	B
	A01	13349963	A	H	B	A	A	H	H	A	A	A	H	A	H	A	B	H	A	H	A	H	A	B	A	B	A	H	A	H	H	H	H	B	H	H	H	H	H	H	H	B	B	A	A	H	H	H	B
	A01	13349987	A	H	B	A	A	H	H	A	A	A	H	A	H	A	B	H	A	H	A	H	A	B	A	B	A	H	A	H	H	H	H	B	H	H	H	H	H	H	H	B	B	A	A	H	H	H	B
	A01	13368240	A	B	B	B	A	H	B	A	B	B	H	B	H	B	B	H	B	H	B	H	B	H	A	H	A	H	A	H	H	B	H	B	H	H	H	H	H	B	H	H	H	H	A	H	B	H	H
	A01	13368684	A	B	B	B	A	H	B	A	B	B	H	B	H	B	B	H	B	H	B	H	B	H	A	H	A	H	A	H	H	B	H	B	H	H	H	H	H	B	H	H	H	H	A	H	B	H	H
	A01	13399690	A	H	B	A	A	H	H	A	A	A	H	A	H	A	B	H	A	H	A	H	A	B	A	B	A	H	A	H	H	H	H	B	H	H	H	H	H	H	H	B	B	A	A	H	H	H	B
	A01	13399817	A	H	B	A	A	H	H	A	A	A	H	A	H	A	B	H	A	H	A	H	A	B	A	B	A	H	A	H	H	H	H	B	H	H	H	H	H	H	H	B	B	A	A	H	H	H	B
	A01	13453027	A	H	B	A	H	H	H	H	A	A	H	A	H	A	B	H	A	H	A	H	A	B	A	B	A	H	A	H	H	H	H	B	H	H	H	H	H	H	H	B	B	A	A	H	H	H	B
	A01	13453429	A	H	B	A	H	H	H	H	A	A	H	A	H	A	B	B	A	H	A	H	A	B	A	B	A	H	A	H	H	H	H	B	H	H	H	H	H	H	H	B	B	A	A	H	H	H	B
	A01	13470930	A	B	B	A	A	B	B	A	A	A	H	A	H	B	B	H	A	B	A	H	A	B	B	B	A	B	A	H	H	H	H	B	H	B	B	H	H	H	H	B	B	A	A	H	H	B	B
	A01	13471307	A	B	B	A	A	B	B	B	A	A	H	A	H	B	B	H	A	B	A	H	A	B	B	B	A	B	A	H	H	H	H	B	H	H	B	H	H	H	H	B	B	A	A	H	B	B	B
	A01	13471338	A	B	B	A	A	B	B	B	A	A	H	A	H	B	B	H	A	B	A	H	A	B	B	B	A	B	A	H	H	H	H	B	H	H	B	H	H	H	H	B	B	A	A	B	B	B	B
	A01	13664801	A	B	B	A	A	B	H	A	A	A	B	A	B	H	B	B	A	B	A	B	H	B	A	B	A	H	A	B	H	H	H	B	H	H	H	B	H	B	B	B	B	A	A	H	H	B	B
	A01	14043624	A	H	B	A	A	H	H	A	A	A	H	A	H	H	B	H	A	H	A	H	A	B	H	B	A	H	A	H	H	H	H	H	H	H	H	H	H	H	H	B	B	A	A	H	H	H	B
	A01	14043799	A	H	B	A	A	H	H	A	A	A	H	A	H	H	B	H	A	H	A	H	A	B	H	B	A	H	A	H	H	H	H	B	H	H	H	H	H	H	H	B	B	A	A	H	H	H	B
	A01	14043818	A	H	B	A	A	H	H	A	A	A	H	A	H	H	B	H	A	H	A	H	A	B	H	B	A	H	A	H	H	H	H	H	H	H	H	H	H	H	H	B	B	A	A	H	H	H	B
	A01	14114630	A	H	B	A	A	H	H	A	A	A	H	A	H	A	B	H	A	H	A	H	A	B	A	B	A	H	A	H	H	H	H	B	H	H	H	H	H	H	H	B	B	A	A	H	H	H	B
	A01	14114631	A	H	B	A	A	H	H	A	A	A	H	A	H	A	B	H	A	H	A	H	A	B	A	B	A	H	A	H	H	H	H	B	H	H	H	H	H	H	H	B	B	A	A	H	H	H	B
	A01	14114665	A	H	B	A	A	H	H	A	A	A	H	A	H	A	B	H	A	H	A	H	A	B	A	B	A	H	A	H	H	H	H	B	H	H	H	H	H	H	H	B	B	A	A	H	H	H	B
	A01	14114898	A	H	B	A	A	H	H	A	A	A	H	A	H	A	B	H	A	H	A	H	A	B	A	B	A	H	A	H	H	H	H	B	H	H	H	H	H	H	H	B	B	A	A	H	H	H	B
	A01	14114915	A	H	B	A	A	H	H	A	A	A	H	A	H	A	B	H	A	H	A	H	A	B	A	B	A	H	A	H	H	H	H	B	H	H	H	H	H	H	H	B	B	A	A	H	H	H	B
	A01	14114949	A	H	B	A	A	H	H	A	A	A	H	A	H	A	B	H	A	H	A	H	A	B	A	B	A	H	A	H	H	H	H	B	H	H	H	H	H	H	H	B	B	A	A	H	H	H	B
	A01	14114951	A	H	B	A	A	H	H	A	A	A	H	A	H	A	B	H	A	H	A	H	A	B	A	B	A	H	A	H	H	H	H	B	H	H	H	H	H	H	H	B	B	A	A	H	H	H	B
	A01	14114967	A	H	B	A	A	H	H	A	A	A	H	A	H	A	B	H	A	H	A	H	A	B	A	B	A	H	A	H	H	H	H	B	H	H	H	H	H	H	H	B	B	A	A	H	H	H	B
	A01	14382067	A	B	B	A	A	A	A	A	A	A	B	A	A	A	B	A	A	A	A	H	A	B	A	H	A	A	A	A	A	B	A	B	B	A	A	A	A	H	B	B	A	A	A	A	H	A	B
	A01	14382072	A	B	B	A	A	A	A	A	A	A	B	A	A	A	B	A	A	A	A	H	A	B	A	H	A	A	A	A	H	B	A	B	B	A	A	A	A	H	B	B	A	A	A	A	H	B	B
	A01	14487161	A	H	B	A	A	H	H	A	A	A	H	A	H	A	B	H	A	H	A	H	A	B	A	B	A	H	A	H	H	H	H	B	H	H	H	A	H	H	H	B	B	A	A	H	H	H	B
	A01	14487194	A	H	B	A	A	H	H	A	A	A	H	A	H	A	B	H	A	H	A	H	A	B	A	B	A	H	A	H	H	H	H	B	H	H	H	A	H	H	H	B	B	A	A	H	H	H	B
	A01	14487473	A	H	B	A	A	H	H	A	A	A	H	A	H	A	B	H	A	H	A	H	A	B	H	B	A	H	A	H	H	H	H	B	H	H	H	H	H	H	H	B	B	A	A	H	H	H	B
	A01	14487478	A	H	B	A	A	H	H	A	A	A	H	A	H	A	B	H	A	H	A	H	A	B	H	B	A	H	A	H	H	H	H	B	H	H	H	H	H	H	H	B	B	A	A	H	H	H	B
	A01	14665591	A	H	B	A	A	H	H	A	A	A	H	A	H	A	B	H	A	H	A	H	A	B	H	B	A	H	A	H	H	H	H	B	H	H	H	H	H	H	H	B	B	A	A	H	H	H	B
	A01	14749861	A	H	B	A	A	H	H	A	A	A	H	A	H	A	B	H	A	H	A	H	A	B	A	H	A	H	A	H	H	H	A	B	H	H	H	H	H	H	H	B	B	A	A	H	H	H	B
	A01	14863771	A	H	B	A	A	H	H	A	A	A	H	A	H	A	B	H	A	H	A	H	H	B	A	H	A	H	A	H	H	H	H	B	H	H	H	H	H	H	H	B	B	A	A	H	H	H	B
	A01	14863772	A	H	B	A	A	H	H	A	A	A	H	A	H	A	B	H	A	H	A	H	A	B	A	H	A	H	A	H	H	H	H	B	H	H	H	H	H	H	H	B	B	A	A	H	H	H	B
	A01	14888671	A	H	B	A	A	H	H	A	A	A	H	A	H	A	H	A	A	H	A	H	A	B	A	H	A	H	A	H	H	H	H	B	H	H	H	H	H	H	H	B	B	A	A	H	H	H	B
	A01	15104052	A	H	B	A	A	H	H	A	A	A	H	A	H	A	H	H	A	H	A	H	A	B	A	H	A	H	A	H	H	H	H	B	H	H	H	H	H	H	H	B	B	A	A	H	H	H	B
	A01	15152698	A	H	B	A	A	H	A	A	A	A	H	A	H	A	B	H	A	H	A	H	A	B	A	B	A	H	A	H	H	H	H	B	A	H	H	H	A	H	H	B	B	A	A	H	H	H	B
	A01	15152700	A	H	B	A	A	H	A	A	A	A	H	A	H	A	B	H	A	H	A	H	A	B	A	B	A	H	A	H	H	H	H	B	A	H	H	H	A	H	H	B	B	A	A	H	H	H	B
	A01	15152730	A	H	B	A	A	H	A	A	A	A	H	A	H	A	B	H	A	H	A	H	A	B	A	B	A	H	A	H	H	H	H	B	A	H	H	H	A	H	H	B	B	A	A	H	H	H	B
	A01	15214828	A	H	B	A	A	H	H	A	A	A	H	A	H	A	B	H	A	H	A	H	A	B	A	B	A	H	A	H	H	H	H	B	H	H	H	B	H	H	H	B	B	A	A	H	H	H	B
	A01	15240071	A	H	B	A	A	H	H	A	A	A	H	A	H	A	B	H	A	H	A	H	A	B	A	B	A	H	A	H	H	H	H	B	H	H	H	H	H	H	H	B	B	A	A	H	H	H	B
	A01	15243412	A	H	B	A	A	H	H	A	A	A	H	A	H	A	B	H	A	H	A	H	A	B	A	B	A	H	A	H	H	H	H	B	H	H	H	H	H	H	H	B	B	A	A	H	H	H	B
	A01	15243422	A	H	B	A	A	H	H	A	A	A	H	A	H	A	B	H	A	H	A	H	A	B	A	B	A	H	A	H	H	H	H	B	H	H	H	H	H	H	H	B	B	A	A	H	H	H	B
	A01	15243431	A	H	B	A	A	H	H	A	A	A	H	A	H	A	B	H	A	H	A	H	A	B	A	B	A	H	A	H	H	H	H	B	H	H	H	H	H	H	H	B	B	A	A	H	H	H	B
	A01	15243444	A	H	B	A	A	H	H	A	A	A	H	A	H	A	B	H	A	H	A	H	A	B	A	B	A	H	A	H	H	H	H	B	H	H	H	H	H	H	H	B	B	A	A	H	H	H	B
	A01	15416897	A	H	B	A	A	H	H	A	A	A	H	A	H	A	B	H	A	H	A	H	H	B	H	B	A	H	A	H	H	B	H	B	H	H	H	H	H	H	H	B	B	A	A	H	H	H	H
	A01	15421930	A	H	B	A	A	H	H	A	A	A	H	A	H	A	B	H	A	H	A	H	A	B	H	B	A	H	A	H	H	H	H	B	H	H	H	H	H	H	H	B	B	A	A	H	H	H	B
	A01	15421931	A	H	B	A	A	H	H	A	A	A	H	A	H	A	B	H	A	H	A	H	A	B	H	B	A	H	A	H	H	H	H	B	H	H	H	H	H	H	H	B	B	A	A	H	H	H	B
	A01	15421986	A	H	B	A	A	H	H	A	A	A	H	A	H	A	B	H	A	H	A	H	A	B	H	B	A	H	A	H	H	H	H	B	H	H	H	H	H	H	H	B	B	A	A	H	H	H	B
	A01	15430799	A	H	B	A	A	H	H	A	A	A	H	A	H	A	B	H	A	H	A	H	A	B	A	B	A	H	A	H	H	H	H	B	H	H	H	H	H	H	H	B	B	A	A	H	H	H	B
	A01	15430849	A	H	B	A	A	H	H	A	A	A	H	A	H	A	B	H	A	H	A	H	A	B	A	B	A	H	A	H	H	H	H	B	H	H	H	H	H	H	H	B	B	A	A	H	H	H	B
	A01	15622957	A	H	B	A	A	H	H	A	A	A	H	A	H	A	B	H	A	H	A	H	H	B	A	B	A	H	A	H	H	H	H	B	H	H	H	H	H	H	H	B	B	A	A	H	H	H	B
	A01	15698715	A	H	B	A	A	H	H	A	A	A	H	A	H	A	B	H	A	H	A	H	A	B	A	B	A	H	A	H	H	H	H	B	H	H	H	H	H	H	H	B	B	A	A	H	H	H	B
	A01	15936145	A	H	B	A	A	H	H	A	A	A	H	A	H	A	B	H	A	H	A	H	A	B	A	B	A	H	A	H	H	H	H	B	H	H	H	H	H	H	H	B	B	A	A	H	H	H	B
	A01	15958191	A	H	B	A	A	H	H	A	A	A	H	A	H	A	B	H	A	H	A	H	H	B	A	B	A	H	A	H	H	H	H	B	H	H	H	H	H	H	H	B	B	A	A	H	H	H	B
	A01	15958207	A	H	B	A	A	H	H	A	A	A	H	A	H	A	B	H	A	H	A	H	H	B	A	B	A	H	A	H	H	H	H	B	H	H	H	H	H	H	H	B	B	A	A	H	H	H	B
	A01	15958212	A	H	B	A	A	H	H	A	A	A	H	A	H	A	B	H	A	H	A	H	H	B	A	B	A	H	A	H	H	H	H	B	H	H	H	H	H	H	H	B	B	A	A	H	H	H	B
	A01	15958462	A	H	B	A	A	H	H	A	A	A	H	A	H	A	B	H	A	H	A	H	H	B	A	B	A	H	A	H	H	H	H	B	H	H	H	H	H	H	H	B	B	A	A	H	H	H	B
	A01	16024681	A	H	B	A	A	H	H	A	A	A	H	A	H	A	B	H	A	H	A	H	A	B	A	B	A	H	A	H	H	H	H	B	H	H	H	H	H	H	H	B	B	A	A	H	H	H	B
	A01	16122363	A	H	B	A	A	H	H	A	A	A	H	A	H	A	B	H	A	H	A	H	A	B	H	B	A	H	A	H	H	H	H	B	H	H	H	H	H	H	H	B	B	A	A	H	H	H	B
	A01	16375911	A	H	B	A	A	H	H	A	A	A	H	A	H	A	B	H	A	H	A	H	A	B	A	H	A	B	A	H	A	H	H	B	H	H	H	H	H	H	A	B	B	A	A	H	H	B	B
	A01	16375963	A	H	B	A	A	H	H	A	A	A	H	A	B	A	B	H	A	H	A	H	H	B	A	B	A	B	A	H	H	H	H	B	H	H	H	H	H	H	H	B	B	A	A	H	H	B	B
	A01	16478163	A	H	B	A	A	H	H	A	A	A	H	A	H	A	B	H	A	H	A	H	A	B	A	B	A	H	A	H	H	H	H	B	H	H	H	H	H	H	H	B	B	A	A	H	H	H	B
	A01	16936636	A	H	B	A	A	H	H	A	A	A	H	A	H	A	B	H	A	H	A	H	A	B	A	B	A	H	A	H	H	H	H	B	H	H	H	H	H	H	H	B	B	A	A	H	H	H	B
	A01	16988203	A	H	B	A	A	H	H	A	A	A	H	A	H	A	B	H	A	H	A	H	A	B	A	B	A	B	A	H	B	H	H	B	B	H	H	H	H	H	H	B	B	A	A	H	H	B	B
	A01	16988239	A	H	B	A	A	H	H	H	A	A	H	A	H	A	B	H	A	H	A	H	A	B	A	B	A	B	A	H	H	H	H	B	B	H	H	H	H	H	H	B	B	A	A	H	H	B	B
	A01	16988252	A	H	B	A	A	H	H	H	A	A	H	A	H	A	B	H	A	H	A	H	A	B	A	B	A	B	A	H	H	H	H	B	B	H	H	H	H	H	H	B	B	A	A	H	H	B	B
	A01	16988403	A	B	B	A	A	B	B	H	A	A	H	A	H	A	B	B	A	H	A	B	H	B	A	B	A	H	A	H	H	H	H	B	B	B	B	H	H	B	H	B	B	A	A	H	B	H	B
	A01	16988408	A	B	B	A	A	B	B	H	A	A	B	A	H	A	B	B	A	H	A	B	H	B	A	B	A	H	A	H	H	H	H	B	B	B	B	H	H	B	H	B	B	A	A	H	B	H	B
	A01	16994447	A	H	B	A	A	H	H	A	A	A	H	A	H	A	B	H	A	H	A	H	A	B	A	B	A	H	A	H	H	H	H	B	H	H	H	H	H	H	H	B	B	A	A	H	H	H	B
	A01	17008307	A	H	B	A	A	H	H	A	A	A	H	A	H	A	B	H	A	H	A	H	H	B	A	B	A	H	A	H	H	H	H	B	H	H	H	H	H	H	H	B	B	A	A	H	H	H	B
	A01	17091242	A	H	B	A	A	H	H	A	A	A	H	A	H	A	B	H	A	H	A	H	A	B	A	B	A	H	A	H	H	H	H	B	H	H	H	H	H	H	H	B	B	A	A	H	H	H	B
	A01	17091266	A	H	B	A	A	H	H	A	A	A	H	A	H	A	B	H	A	H	A	H	A	B	A	B	A	H	A	H	H	H	H	B	H	H	H	H	H	H	H	B	B	A	A	H	H	H	B
	A01	17119628	A	H	B	A	H	H	H	A	A	A	H	A	H	A	B	H	A	H	A	H	A	B	A	B	A	H	A	H	H	H	H	B	H	H	H	A	H	H	H	B	B	A	A	H	H	H	B
	A01	17119678	A	H	B	A	H	H	H	A	A	A	H	A	H	A	B	H	A	H	A	H	A	B	A	B	A	H	A	H	H	H	H	B	H	H	H	A	H	H	H	B	B	A	A	H	H	H	B
	A01	17119690	A	H	B	A	H	H	H	A	A	A	H	A	H	A	B	H	A	H	A	H	A	B	A	B	A	H	A	H	H	H	H	B	H	H	H	A	H	H	H	B	B	A	A	H	H	H	B
	A01	17119958	A	H	B	A	H	H	H	A	A	A	H	A	H	A	B	H	A	H	A	H	A	B	A	B	A	H	A	H	H	H	H	B	H	H	H	A	H	H	H	B	B	A	A	H	H	H	B
	A01	17119965	A	H	B	A	H	H	H	A	A	A	H	A	H	A	B	H	A	H	A	H	A	B	A	B	A	H	A	H	H	H	H	B	H	H	H	A	H	H	H	B	B	A	A	H	H	H	B
	A01	17119986	A	H	B	A	H	H	H	A	A	A	H	A	H	A	B	H	A	H	A	H	A	B	A	B	A	H	A	H	H	H	H	B	H	H	H	A	H	H	H	B	B	A	A	H	H	H	B
	A01	17120024	A	H	B	A	H	H	H	A	A	A	H	A	H	A	B	H	A	H	A	H	A	B	A	B	A	H	A	H	H	H	H	B	H	H	H	A	H	H	H	B	B	A	A	H	H	H	B
	A01	17163143	A	H	B	A	H	H	H	A	A	A	H	A	H	A	B	H	A	H	A	H	A	B	A	H	A	H	A	H	H	H	H	B	H	H	H	H	H	A	H	B	B	A	A	H	H	H	H
	A01	17479298	A	H	B	A	A	H	H	A	A	A	H	A	H	A	B	H	A	H	A	H	A	B	A	B	A	H	A	H	H	H	H	B	H	H	H	H	H	H	H	H	B	A	A	H	H	H	B
	A01	17488019	A	H	B	A	A	H	H	A	A	A	H	A	H	A	B	H	A	H	A	H	A	B	A	B	A	H	A	H	H	H	H	B	H	H	H	H	H	H	H	B	B	A	A	H	H	H	B
	A01	17488038	A	H	B	A	A	H	H	A	A	A	H	A	H	A	B	H	A	H	A	H	A	B	A	B	A	H	A	H	H	H	H	B	H	H	H	H	H	H	H	B	B	A	A	H	H	H	B
	A01	17488284	A	H	B	A	A	H	H	A	A	A	H	A	H	A	B	H	A	H	A	H	A	B	A	B	A	H	A	H	H	H	H	B	H	H	H	H	H	H	H	B	B	A	A	H	H	H	B
	A01	17575782	A	H	B	A	A	H	H	A	A	A	H	A	H	A	B	H	A	H	A	B	H	B	H	B	A	H	A	H	H	H	H	B	H	H	H	H	H	H	H	B	B	A	A	H	H	H	B
	A01	17575789	A	H	B	A	A	H	H	A	A	A	H	A	H	A	B	H	A	H	A	B	H	B	H	B	A	H	A	H	H	H	H	B	H	H	H	H	H	H	H	B	B	A	A	H	H	H	B
	A01	17634051	A	H	B	A	A	H	B	H	A	A	B	A	H	A	B	B	A	H	A	B	H	B	B	B	B	B	A	B	B	H	H	B	H	B	B	B	H	B	H	B	B	A	A	H	B	H	B
	A01	17996369	A	H	B	A	A	H	H	A	A	A	H	A	H	A	B	H	A	H	A	B	A	B	H	B	A	H	A	H	H	H	H	B	H	H	H	H	H	H	H	B	B	A	A	H	H	H	B
	A01	17996616	A	H	B	A	A	H	H	A	A	A	H	A	H	A	B	H	A	H	A	B	A	B	H	B	A	H	A	H	H	H	H	B	H	H	H	H	H	H	H	B	B	A	A	H	H	H	B
	A01	17996629	A	H	B	A	A	H	H	A	A	A	H	A	H	A	B	H	A	H	A	B	A	B	H	B	A	H	A	H	H	H	H	B	H	H	H	H	H	H	H	B	B	A	A	H	H	H	B
	A01	17996656	A	H	B	A	A	H	H	A	A	A	H	A	H	A	B	H	A	H	A	B	A	B	H	B	A	H	A	H	H	H	H	B	H	H	H	H	H	H	H	B	B	A	A	H	H	H	B
	A01	17996669	A	H	B	A	A	H	H	A	A	A	H	A	H	A	B	H	A	H	A	B	A	B	H	B	A	H	A	H	H	H	H	B	H	H	H	H	H	H	H	B	B	A	A	H	H	H	B
	A01	18006698	A	H	B	A	A	H	H	A	A	A	H	A	H	A	B	H	A	H	A	B	A	B	A	B	A	H	A	H	H	H	H	B	H	H	H	H	H	H	H	B	B	A	A	H	H	H	B
	A01	18006734	A	H	B	A	A	H	H	A	A	A	H	A	H	A	B	H	A	H	A	B	A	B	A	B	A	H	A	H	H	H	H	B	H	H	H	H	H	H	H	B	B	A	A	H	H	H	B
	A01	18193081	A	B	B	A	A	H	H	A	A	A	B	A	H	A	B	H	A	H	A	H	A	H	A	H	A	H	A	H	H	B	H	H	H	H	H	B	H	B	H	H	H	A	A	H	B	H	H
	A01	18396952	A	H	B	A	A	H	A	A	A	A	H	A	H	A	H	H	A	A	A	A	A	H	A	H	A	A	A	H	H	H	A	H	H	A	A	H	H	H	A	H	H	A	A	H	H	H	A
	A01	18411379	A	H	B	A	A	H	H	A	A	A	H	A	H	A	B	H	A	H	A	B	A	B	A	B	A	H	A	H	H	H	H	B	H	H	H	H	H	H	H	H	B	A	A	H	H	H	B
	A01	18411385	A	H	B	A	A	H	H	A	A	A	H	A	H	A	H	H	A	H	A	B	A	B	A	B	A	H	A	H	H	H	H	B	H	H	H	H	H	H	H	B	B	A	A	H	H	H	B
	A01	18413740	A	B	B	A	A	H	H	A	A	A	H	A	H	A	H	B	A	H	A	B	A	B	A	B	A	B	A	H	H	H	H	B	H	H	H	H	H	H	H	B	B	A	A	H	H	H	B
	A01	18413743	A	B	B	A	A	H	H	A	A	A	H	A	H	A	H	B	A	H	A	B	A	B	A	B	A	B	A	H	H	H	H	B	H	H	H	H	H	H	H	B	B	A	A	H	H	H	B
	A01	18463618	A	H	B	A	A	H	H	A	A	A	H	A	H	A	B	H	A	H	A	B	H	B	A	B	A	H	A	H	H	H	H	B	H	H	H	H	H	H	H	B	B	A	A	H	H	H	B
	A01	18463950	A	H	B	A	A	H	H	A	A	A	H	A	H	H	B	H	A	H	A	B	A	B	A	B	A	H	A	H	H	H	H	B	H	H	H	H	H	H	H	B	B	A	A	H	H	H	B
	A01	19528901	A	H	B	A	A	H	H	A	A	A	H	A	H	A	B	H	A	H	A	B	A	B	A	B	A	H	A	H	H	H	H	B	H	H	H	H	H	H	H	B	B	A	A	H	H	H	B
	A01	19567285	A	H	B	A	A	H	H	A	A	A	H	A	H	A	B	H	A	H	A	B	A	B	A	B	A	H	A	H	H	H	H	B	H	H	H	H	H	H	H	B	B	A	A	H	H	H	B
	A01	19605863	A	H	B	A	A	H	H	A	A	A	H	A	H	A	B	H	A	H	A	B	A	B	A	B	A	H	A	H	H	H	H	B	H	H	H	H	H	H	H	B	B	A	A	H	H	H	B
	A01	20130149	A	H	B	A	A	H	H	A	A	A	H	A	H	H	B	H	A	H	A	B	H	B	A	B	A	H	A	H	H	H	H	B	H	H	H	H	H	H	H	B	B	A	A	H	H	H	B
	A01	20280787	A	H	B	A	H	H	H	A	A	A	H	A	H	A	B	H	A	H	A	B	A	B	A	B	A	H	A	H	H	H	H	B	H	H	H	H	H	H	H	B	B	A	A	H	H	H	B
	A01	20580402	A	H	B	A	H	H	H	A	A	A	H	A	H	A	B	H	A	H	A	B	A	B	A	B	A	H	A	H	H	H	H	B	H	H	H	H	H	H	H	B	B	A	A	H	H	H	B
	A01	20580572	A	H	B	A	H	H	H	A	A	A	H	A	H	A	B	H	A	H	A	B	A	B	A	B	A	H	A	H	H	H	H	B	H	H	H	H	H	H	H	B	B	A	A	H	H	H	B
	A01	20639336	A	H	B	A	H	H	H	A	A	A	A	A	H	A	B	H	A	H	A	B	A	B	A	B	A	A	A	A	H	A	H	B	H	H	H	H	H	H	H	B	B	A	A	A	H	A	B
	A01	20639391	A	H	B	A	H	H	H	A	A	A	A	A	H	A	B	H	A	H	A	B	A	B	A	B	A	A	A	A	H	A	H	B	H	H	H	H	H	A	H	B	B	A	A	A	H	A	B
	A01	20639457	A	H	B	A	H	H	H	A	A	A	A	A	H	A	B	H	A	H	A	B	A	B	A	B	A	A	A	A	H	A	H	B	H	H	H	H	H	H	H	B	B	A	A	A	H	B	B
	A01	20833177	A	H	B	A	H	H	H	A	A	A	H	A	H	A	B	B	A	H	A	B	A	B	A	B	A	H	A	H	H	H	H	B	H	H	H	H	H	H	H	B	B	A	A	H	H	H	B
	A01	20833187	A	H	B	A	H	H	H	A	A	A	H	A	H	A	B	B	A	H	A	B	A	B	A	B	A	H	A	H	H	H	H	B	H	H	H	H	H	H	H	B	B	A	A	H	H	H	B
	A01	20833353	A	H	B	A	H	H	H	A	A	A	H	A	H	A	B	B	A	H	A	B	A	B	A	B	A	H	A	H	H	H	H	B	H	H	H	H	H	H	H	B	B	A	A	H	H	H	B
	A01	21011323	A	H	B	A	H	H	H	H	A	A	H	A	H	A	B	H	A	H	A	B	A	H	A	B	A	H	A	H	H	H	H	B	H	H	H	H	H	H	H	B	B	A	A	H	H	B	H
	A01	21152032	A	H	B	A	H	H	H	A	A	A	H	A	H	A	B	H	A	H	A	B	A	H	A	B	A	H	A	H	H	H	H	B	H	H	H	H	H	H	H	B	B	A	A	H	H	H	B
	A01	21243844	A	H	B	A	H	H	H	A	A	A	H	A	H	A	B	H	A	H	A	B	A	H	A	B	A	H	A	H	H	H	H	B	H	H	H	H	H	H	H	B	B	A	A	H	H	H	B
	A01	21301543	A	H	B	A	H	H	H	A	A	A	H	A	H	A	B	H	A	H	A	B	A	H	A	B	A	H	A	H	H	H	H	B	H	H	H	H	H	H	H	B	B	A	A	H	H	H	B
	A01	21408945	A	H	H	A	H	H	H	A	A	A	H	A	H	A	B	H	A	H	A	B	A	H	A	B	A	H	A	H	H	H	H	B	H	H	H	H	H	H	H	B	B	A	A	H	H	H	H
	A01	21408977	A	H	H	A	H	H	H	A	A	A	H	A	H	A	H	H	A	H	A	B	A	H	A	B	A	H	A	H	H	H	H	B	H	H	H	H	H	H	H	B	B	A	A	H	H	H	B
	A01	21408992	A	H	H	A	H	H	H	A	A	A	H	A	H	A	H	H	A	H	A	B	A	H	A	B	A	H	A	H	H	H	H	B	B	H	H	H	H	H	H	B	B	H	A	H	H	H	B
	A01	21408993	A	H	H	A	H	H	H	A	A	A	H	A	H	A	H	H	A	H	A	B	A	H	A	B	A	H	A	H	H	H	H	B	B	H	H	H	H	H	H	B	B	H	A	H	H	H	B
	A01	21516063	A	H	H	A	H	H	H	A	A	A	H	A	H	A	B	H	A	H	A	B	A	H	A	H	A	H	A	H	H	H	H	B	B	H	H	H	H	H	H	B	B	H	A	H	H	H	H
	A01	21613576	A	H	H	A	H	H	B	H	A	A	H	A	H	A	B	H	A	H	A	B	A	H	A	B	A	H	A	H	H	H	H	B	B	H	H	H	H	H	H	B	B	H	A	H	H	H	H
	A01	21613983	A	H	H	A	H	H	B	H	A	A	H	A	H	A	B	H	A	H	A	B	A	H	A	B	A	H	A	H	H	H	H	B	B	H	H	H	H	H	H	B	B	H	A	H	H	H	H
	A01	21613984	A	H	H	A	H	H	B	H	A	A	H	A	H	A	B	H	A	H	A	B	A	H	A	B	A	H	A	H	H	H	H	B	B	H	H	H	H	H	H	B	B	H	A	H	H	H	H
	A01	21613985	A	H	H	A	H	H	B	H	A	A	H	A	H	A	B	H	A	H	A	B	A	H	A	H	A	H	A	H	H	H	H	B	B	H	H	H	H	H	H	B	B	H	A	H	H	H	H
	A01	21613992	A	H	H	A	H	H	B	H	A	A	H	A	H	A	B	H	A	H	A	B	A	H	A	B	A	H	A	H	H	H	H	B	B	H	H	H	H	H	H	B	B	H	A	H	H	H	H
	A01	21614028	A	H	H	A	H	H	B	H	A	A	H	A	H	A	B	H	A	H	A	B	A	H	A	B	A	H	A	H	H	H	H	B	B	H	H	H	H	H	H	B	B	H	A	H	H	H	H
	A01	21614029	A	H	H	A	H	H	B	H	A	A	H	A	H	A	B	H	A	H	A	B	A	H	A	B	A	H	A	H	H	H	H	B	B	H	H	H	H	H	H	B	B	H	A	H	H	H	H
	A01	21697231	A	H	H	A	H	H	B	H	A	A	H	A	H	A	B	H	A	H	A	B	A	H	A	B	A	H	A	H	H	H	H	B	B	H	H	H	H	H	H	B	B	H	A	H	H	H	H
	A01	22018412	A	H	H	A	H	H	B	A	A	A	H	A	H	A	B	H	A	H	A	B	A	H	A	B	A	H	A	H	H	H	H	B	B	H	H	H	H	H	H	B	B	H	A	H	A	H	H
	A01	22114070	A	H	H	A	H	H	B	A	A	A	H	A	H	A	B	H	A	H	A	B	A	H	A	B	A	H	A	H	H	H	H	B	B	H	H	H	H	H	H	B	B	H	A	H	A	H	H
	A01	22114115	A	H	H	A	H	H	B	A	A	A	H	A	H	A	B	H	A	H	A	B	A	H	A	B	A	H	A	H	H	H	H	B	B	H	H	H	H	H	H	B	B	H	A	H	A	H	H
	A01	22114219	A	H	H	A	H	H	B	A	A	A	H	A	H	A	B	H	A	H	A	B	A	H	A	B	A	H	A	H	H	H	H	B	B	H	H	H	H	H	H	B	B	H	A	H	A	H	H
	A01	23057606	A	H	H	A	H	H	B	A	A	A	H	A	H	H	B	H	A	H	A	B	A	H	A	B	A	A	A	H	H	H	H	B	B	H	H	H	H	H	H	B	H	H	A	H	A	H	H
	A01	23057625	A	H	H	A	H	H	B	A	A	A	H	A	H	H	B	H	A	H	A	B	A	H	A	B	A	A	A	H	H	H	H	B	B	H	H	H	H	H	H	B	H	H	A	H	A	H	H
	A01	23189883	A	H	H	A	H	H	B	A	A	H	H	A	H	A	B	H	A	H	A	B	A	H	A	B	A	A	A	H	H	H	H	B	B	H	H	H	H	H	H	B	H	H	A	H	A	H	H
	A01	23189921	A	H	H	A	H	H	B	A	A	H	H	A	H	A	B	H	A	H	A	B	A	H	A	B	A	A	A	H	H	H	H	B	B	H	H	H	H	H	H	B	H	H	A	H	A	H	H
	A01	23196381	A	H	H	A	H	H	B	A	A	H	H	A	H	A	B	H	A	H	A	B	A	H	H	B	A	A	A	H	H	H	H	B	B	H	B	H	H	H	H	B	H	H	A	H	A	H	H
	A01	23196429	A	H	H	A	H	H	B	A	A	H	H	A	H	A	B	H	A	H	A	B	A	H	H	B	A	A	A	H	H	H	H	B	B	H	B	H	H	H	H	B	H	H	A	H	A	H	H
	A01	23196437	A	H	H	A	H	H	B	A	A	H	H	A	H	A	B	H	A	H	A	B	A	H	H	B	A	A	A	H	H	H	H	B	B	H	B	H	H	H	H	B	H	H	A	H	A	H	H
	A01	23256151	A	H	H	A	H	H	B	A	A	H	H	A	H	A	H	H	A	H	A	B	A	H	A	B	A	A	A	H	H	H	H	B	B	H	H	B	H	H	H	B	H	H	A	H	A	H	H
	A01	23631148	A	H	H	A	H	H	B	A	A	H	H	A	H	A	B	H	A	H	A	B	A	H	A	H	A	A	A	H	H	H	H	H	B	H	H	H	H	H	H	B	H	H	A	H	A	H	H
	A01	23631245	A	H	H	A	H	H	B	A	A	H	H	A	H	H	B	H	A	H	A	B	A	H	A	B	A	A	A	H	H	H	H	B	B	H	H	H	H	H	H	B	H	H	A	H	A	H	H
	A01	23831658	A	H	H	A	H	H	B	A	A	H	H	A	H	A	B	H	A	H	A	B	A	H	A	B	A	A	A	H	H	H	H	B	B	H	H	H	H	H	H	B	H	H	A	H	A	H	H
	A01	23831922	A	H	H	A	H	H	B	A	A	H	H	A	H	A	B	H	A	H	A	B	A	H	A	B	A	A	A	H	H	H	H	B	B	H	H	H	H	H	H	B	H	H	A	H	A	H	H
	A01	23942167	A	H	H	A	H	H	B	A	A	H	H	A	H	H	B	H	A	H	A	B	A	H	A	B	A	A	A	H	H	H	H	B	B	H	H	H	H	H	H	B	H	H	A	H	A	H	H
	A01	23942172	A	H	H	A	H	H	B	A	A	H	H	A	H	H	B	H	A	H	A	B	A	H	A	B	A	A	A	H	H	H	H	B	B	H	H	H	H	H	H	B	H	H	A	H	A	H	H
	A01	23942193	A	H	H	A	H	H	B	A	A	H	H	A	H	H	B	H	A	H	A	B	A	H	A	B	A	A	A	H	H	H	H	B	B	H	H	H	H	H	H	B	H	H	A	H	A	H	H
	A01	24496862	A	H	H	A	H	H	B	A	H	H	A	A	H	H	B	H	A	H	A	B	A	H	A	B	A	A	A	H	H	H	H	B	B	H	H	H	H	H	H	B	H	H	A	H	A	H	H
	A01	24496873	A	H	H	A	H	H	B	A	H	H	A	A	H	H	B	H	A	H	A	B	A	H	A	B	A	A	A	H	H	H	H	B	B	H	H	H	H	H	H	B	H	H	A	H	A	H	H
	A01	24496904	A	H	H	A	H	H	B	A	H	H	A	A	H	H	B	H	A	H	A	B	A	H	A	B	A	A	A	H	H	H	H	B	B	H	H	H	H	H	H	B	H	H	A	H	A	H	H
	A01	24496930	A	H	H	A	H	H	B	A	H	H	A	A	H	H	B	H	A	H	A	B	A	H	A	B	A	A	A	H	H	H	H	B	B	H	H	H	H	H	H	B	H	H	A	H	A	H	H
	A01	24496931	A	H	H	A	H	H	B	A	H	H	A	A	H	H	B	H	A	H	A	B	A	H	A	B	A	A	A	H	H	H	H	B	B	H	H	H	H	H	H	B	H	H	A	H	A	H	H
	A01	24497056	A	H	H	A	H	H	B	A	H	H	A	A	H	H	B	H	A	H	A	B	A	H	A	B	A	A	A	H	H	B	H	B	B	H	H	H	H	H	H	B	H	H	A	H	A	H	H
	A01	24702345	A	H	H	A	H	H	B	A	A	H	A	A	H	H	B	H	A	H	A	B	A	H	A	B	A	A	A	H	H	H	H	B	B	H	H	H	H	H	H	B	A	H	A	H	A	H	H
	A01	24702363	A	H	H	A	H	H	B	A	H	H	A	A	H	H	B	H	A	H	A	B	A	H	A	B	A	A	A	H	H	H	H	B	B	H	H	H	H	H	H	B	A	H	A	H	A	H	H
	A01	24706218	A	A	H	A	H	H	H	A	A	A	A	A	H	H	B	H	A	H	A	H	A	H	A	H	A	A	A	H	H	H	H	H	B	H	A	H	H	H	H	B	A	A	A	A	A	H	H
	A01	24812396	A	H	H	A	H	H	B	A	H	H	A	A	H	H	B	H	A	H	A	B	A	H	A	B	A	A	A	H	H	H	H	B	B	H	H	H	H	H	H	H	A	H	A	H	A	H	H
	A01	24933918	A	H	H	A	B	H	B	A	H	H	A	A	H	H	B	H	A	H	A	B	A	H	A	B	A	A	A	H	H	H	H	B	B	H	H	H	H	H	H	H	A	H	A	H	A	H	H
	A01	24934201	A	H	H	A	B	H	B	A	H	H	A	A	H	H	B	H	A	H	A	B	A	H	A	B	A	A	A	H	H	H	H	B	B	H	H	H	H	H	H	H	A	H	A	H	A	H	H
	A01	25729222	A	H	B	A	A	H	H	A	A	A	H	A	H	A	B	H	A	H	A	H	A	B	A	B	A	H	A	H	H	H	H	B	H	H	H	H	H	H	H	B	B	A	A	H	H	H	B
	A01	25729245	A	H	B	A	A	H	H	A	A	A	H	A	H	A	B	H	A	H	A	H	A	B	A	B	A	H	A	H	H	H	H	B	H	H	H	H	H	H	H	B	B	A	A	H	H	H	B
	A01	25729259	A	H	B	A	A	H	H	A	A	A	H	A	H	A	B	H	A	H	A	H	A	B	A	B	A	H	A	H	H	H	H	B	H	H	H	H	H	H	H	B	B	A	A	H	H	H	B
	A01	25729280	A	H	B	A	A	H	H	A	A	A	H	A	H	A	B	H	A	H	A	H	A	B	A	B	A	H	A	H	H	H	H	B	H	H	H	H	H	H	H	B	B	A	A	H	H	H	B
	A01	25729410	A	H	B	A	A	H	H	A	A	A	H	A	H	A	B	H	A	H	A	H	A	B	A	B	A	H	A	H	H	H	H	B	H	H	H	H	H	H	H	B	B	A	A	H	H	H	B
	A01	25729425	A	H	B	A	A	H	H	A	A	A	H	A	H	A	B	H	A	H	A	H	A	B	A	B	A	H	A	H	H	H	H	B	H	H	H	H	H	H	H	B	B	A	A	H	H	H	B
	A01	25729429	A	H	B	A	A	H	H	A	A	A	H	A	H	A	B	H	A	H	A	H	A	B	A	B	A	H	A	H	H	H	H	B	H	H	H	H	H	H	H	B	B	A	A	H	H	H	B
	A01	25749767	A	H	B	A	A	H	H	A	A	A	H	A	H	A	B	H	A	H	A	H	A	B	A	B	A	H	A	H	H	H	H	B	H	H	H	H	H	H	H	B	B	A	A	H	H	H	B
	A01	25750111	A	H	B	A	A	H	H	A	A	A	H	A	H	A	B	H	A	H	A	H	A	B	A	B	A	H	A	H	H	H	H	B	H	H	H	H	H	H	H	B	B	A	A	H	H	H	B
	A01	25781042	A	H	B	A	A	H	H	A	A	A	H	A	H	A	B	H	A	H	A	H	A	H	A	B	A	H	A	H	H	H	H	B	H	H	H	H	H	H	H	B	B	A	A	B	H	H	B
	A01	25781046	A	H	B	A	A	H	H	A	A	A	H	A	H	A	B	H	A	H	A	H	A	H	A	B	A	H	A	H	H	H	H	B	H	H	H	H	H	H	H	B	B	A	A	B	H	H	B
	A01	25918281	A	H	B	A	A	H	H	A	A	A	H	A	H	A	B	H	A	H	A	H	A	B	A	B	A	H	A	H	H	H	H	B	H	H	H	H	H	H	H	B	B	A	A	H	H	H	B
	A01	25926136	A	H	B	A	A	H	H	A	A	A	H	A	H	A	B	H	A	H	A	H	A	B	A	B	A	H	A	H	H	H	H	B	H	H	H	H	H	H	H	B	B	A	A	H	H	H	B
	A01	25960522	A	H	B	A	A	H	H	A	A	A	H	A	H	A	B	H	A	H	A	H	A	B	H	B	A	H	A	H	H	H	H	B	H	H	H	H	H	H	H	H	B	A	A	H	H	H	B
	A01	25960817	H	H	B	A	A	H	H	H	A	A	H	A	H	A	B	H	A	H	A	H	A	B	H	B	A	H	A	H	H	H	H	B	H	H	H	H	H	H	H	H	B	A	A	H	H	H	B
	A01	25977385	A	H	B	A	A	H	H	A	A	A	H	A	H	A	B	H	A	H	A	H	A	B	A	B	A	H	A	H	H	H	H	B	H	H	H	H	H	H	H	H	B	A	A	H	H	H	B
	A01	25980111	A	H	B	A	A	H	H	A	A	A	H	A	H	A	B	H	A	H	A	H	A	B	A	B	A	H	A	H	H	H	H	B	H	H	H	H	H	H	H	B	B	A	A	H	H	H	B
	A01	25980225	A	H	B	A	A	H	H	A	A	A	H	A	H	A	B	H	A	H	A	H	A	B	A	B	A	H	A	H	H	H	H	B	H	H	H	H	H	H	H	B	B	A	A	H	H	H	B
	A01	26145130	A	H	B	A	A	H	H	A	A	A	H	A	H	A	B	H	A	H	A	H	A	B	H	B	A	H	A	H	H	H	H	B	H	H	H	H	H	H	H	B	B	A	A	H	H	H	B
	A01	26145272	A	H	B	A	A	H	H	A	A	A	H	A	H	A	B	H	A	H	A	H	A	B	A	B	A	H	A	H	H	H	H	B	H	H	H	H	H	H	H	H	B	A	A	H	H	H	B
	A01	26145277	A	H	B	A	A	H	H	A	A	A	H	A	H	A	B	H	A	H	A	H	A	B	A	B	A	H	A	H	H	H	H	B	H	H	H	H	H	H	H	H	B	A	A	H	H	H	B
	A01	26243375	A	H	B	A	A	H	H	A	A	A	H	A	H	A	B	H	A	H	A	H	A	B	H	B	A	H	A	H	H	H	H	B	H	H	H	H	H	H	H	B	B	A	A	H	H	H	B
	A01	26243381	A	H	B	A	A	H	H	A	A	A	H	A	H	A	B	H	A	H	A	H	A	B	H	B	A	H	A	H	H	H	H	B	H	H	H	H	H	H	H	B	B	A	A	H	H	H	B
	A01	26243627	A	H	B	A	A	H	H	A	A	A	H	A	H	A	B	H	A	H	A	H	A	H	H	B	A	H	A	H	H	H	H	B	H	H	H	H	H	H	H	B	B	A	A	H	H	H	B
	A01	26385961	A	H	A	A	B	B	B	H	H	H	A	A	H	H	B	H	A	H	A	B	A	A	A	B	A	A	A	H	H	A	H	B	B	H	H	A	H	H	H	H	A	H	A	H	A	H	H
	A01	26385964	A	H	A	A	B	B	B	H	H	H	A	A	H	H	B	H	A	H	A	B	A	A	A	B	A	A	A	H	H	A	H	B	B	H	H	A	H	H	H	H	A	H	A	H	A	H	H
	A01	26385986	A	H	A	A	B	B	B	H	H	H	A	A	H	H	B	H	A	H	A	B	A	A	A	B	A	A	A	H	H	A	H	B	B	H	H	A	H	H	H	H	A	H	A	H	A	H	H
	A01	26515652	A	H	H	A	B	B	B	H	H	H	A	A	H	H	B	H	A	H	A	B	A	H	A	B	A	A	A	H	A	A	H	B	B	H	A	H	H	H	H	H	A	H	A	H	A	H	H
	A01	26515693	A	H	H	A	B	B	B	H	H	H	A	A	H	H	B	H	A	H	A	B	A	H	A	B	A	A	A	H	A	A	H	B	B	H	A	H	H	H	H	H	A	H	A	H	A	H	H
	A01	26515730	A	H	H	A	B	B	B	H	H	H	A	A	H	H	B	H	A	H	A	B	A	H	A	B	A	A	A	H	A	A	H	B	B	H	A	H	H	H	H	H	A	H	A	H	A	H	H
	A01	26515775	A	H	H	A	B	B	B	H	H	H	A	A	H	H	B	H	A	H	A	B	A	H	A	B	A	A	A	H	A	A	H	B	B	H	A	H	H	H	H	H	A	H	A	H	A	H	H
	A01	26618527	A	H	H	A	B	B	B	H	H	H	A	A	H	H	B	H	A	H	A	B	A	H	A	B	A	A	A	H	A	A	H	B	B	H	A	H	H	H	H	H	A	H	A	H	A	H	H
	A01	26620826	A	H	H	A	B	B	B	A	H	H	A	A	H	H	H	H	H	H	A	B	A	H	A	B	A	A	A	H	A	A	H	B	B	H	A	H	H	H	H	H	A	H	A	H	A	H	H
	A01	26637310	A	H	H	A	B	B	B	H	H	H	A	A	H	H	B	H	A	H	A	B	A	H	A	B	A	A	A	H	A	A	H	B	B	H	A	H	H	H	H	H	A	H	A	H	A	H	H
	A01	26637370	A	H	H	A	B	B	B	H	H	H	A	A	H	H	B	H	A	H	A	B	A	H	A	B	A	A	A	H	A	A	H	B	B	H	A	H	H	H	H	H	A	H	A	H	A	H	H
	A01	26763840	A	H	A	A	A	B	B	H	B	H	B	H	B	A	A	H	A	H	H	H	A	B	A	H	H	B	B	A	H	H	H	A	A	A	B	H	H	A	B	B	A	H	A	H	A	H	B
	A01	26778452	A	H	A	A	A	B	B	H	B	H	B	H	B	A	A	H	A	B	H	H	H	B	A	H	H	B	B	A	H	H	H	A	A	A	B	H	H	A	B	B	A	H	A	H	A	B	B
	A01	26778465	A	H	A	A	A	B	B	H	B	H	B	H	B	A	A	H	A	B	H	H	H	B	A	H	H	B	B	A	H	H	H	A	A	A	B	H	H	A	B	B	A	H	A	H	A	B	B
	A01	26778474	A	H	A	A	A	B	B	H	B	H	B	H	B	A	A	H	A	B	H	H	H	B	A	H	H	B	B	A	H	H	H	A	A	A	B	H	H	A	B	B	A	H	A	H	A	B	B
	A01	26778482	A	H	A	A	A	B	B	H	B	H	B	H	B	A	A	H	A	B	H	H	H	B	A	H	H	B	B	A	H	H	H	A	A	A	B	H	H	A	B	B	A	H	A	H	A	B	B
	A01	26778497	A	H	A	A	A	B	B	H	B	H	B	H	B	A	A	H	A	B	H	H	H	B	A	H	H	B	B	A	H	H	H	A	A	A	B	H	H	A	B	B	A	H	A	H	A	B	B
	A01	26778501	A	H	A	A	A	B	B	H	B	H	B	H	B	A	A	H	A	B	H	H	H	B	A	H	H	B	B	A	H	H	H	A	A	A	B	H	H	A	B	B	A	H	A	H	A	B	B
	A01	26778517	A	H	A	A	A	B	B	H	B	H	B	H	B	A	A	H	A	B	H	H	H	B	A	H	H	B	B	A	H	H	H	A	A	A	B	H	H	A	B	B	A	H	A	H	A	B	B
	A01	26778718	A	H	A	A	A	B	B	H	B	H	B	H	B	A	A	H	A	B	H	H	H	B	A	H	H	B	B	A	H	H	H	A	A	A	B	H	H	A	B	B	A	H	A	H	A	B	B
	A01	26778741	A	H	A	A	A	B	B	H	B	H	B	H	B	A	A	H	A	B	H	H	H	B	A	H	H	B	B	A	H	H	H	A	A	A	B	H	H	A	B	B	A	H	A	H	A	B	B
	A01	26778751	A	H	A	A	A	B	B	H	B	H	B	H	B	A	A	H	A	B	H	H	H	B	A	H	H	B	B	A	H	H	H	A	A	A	B	H	H	A	B	B	A	H	A	H	A	B	B
	A01	26797035	A	H	A	A	H	B	H	H	B	H	B	H	B	A	A	H	A	B	H	H	H	B	A	H	H	B	B	A	H	H	H	A	A	A	B	H	H	A	B	B	A	H	A	H	A	H	B
	A01	26797306	A	H	A	A	H	H	H	H	B	H	B	H	B	A	A	H	A	B	H	H	H	B	A	H	H	B	B	A	H	H	H	A	A	A	B	H	H	A	B	B	A	H	A	H	A	H	B
	A01	26919346	A	H	A	A	A	H	B	H	B	H	B	H	B	A	A	A	A	B	H	H	H	B	A	H	H	B	B	A	H	H	H	A	A	A	B	H	H	A	B	H	A	A	A	H	A	H	B
	A01	26966885	A	H	A	A	H	H	B	H	B	H	B	H	B	A	A	A	A	B	H	H	H	B	H	H	H	B	B	A	H	H	H	A	A	A	B	H	H	A	B	H	A	A	A	H	A	H	B
	A01	27028442	A	H	A	A	A	H	B	H	B	H	B	H	B	A	A	A	A	B	H	H	H	B	H	H	H	B	B	A	H	B	A	A	A	A	B	H	H	A	B	H	A	A	A	H	A	H	B
	A01	27083467	A	H	H	A	B	B	B	H	H	H	A	A	H	H	B	H	A	H	A	B	A	H	A	B	A	A	A	H	A	A	H	B	B	H	A	A	H	H	H	H	A	H	A	H	A	H	H
	A01	27083491	A	H	H	A	B	B	B	H	H	H	A	A	H	H	B	H	A	H	A	B	A	H	A	B	A	A	A	H	A	A	H	B	B	H	A	H	H	H	H	H	A	H	A	H	A	H	H
	A01	27198682	A	H	H	A	B	B	B	H	H	H	A	A	H	H	B	H	A	H	A	B	A	H	A	B	A	A	A	H	A	A	H	B	B	H	A	H	H	H	H	H	A	H	A	H	A	H	H
	A01	27228484	A	H	H	A	B	B	B	H	H	H	A	A	H	H	B	H	A	H	A	B	A	H	A	B	A	A	A	H	A	A	H	B	B	H	A	H	H	H	H	H	A	H	A	H	A	H	H
	A01	27228580	A	H	H	A	B	B	B	H	H	H	A	A	H	H	B	H	A	H	A	B	A	H	A	B	A	A	A	H	A	A	H	B	B	H	A	H	H	H	H	H	A	H	A	H	A	H	H
	A01	27323440	A	H	H	A	B	B	B	H	H	H	A	A	B	H	B	H	A	H	A	B	A	H	H	B	A	A	A	H	A	A	H	B	B	H	A	B	H	H	H	H	A	H	A	H	A	H	H
	A01	27323449	A	H	H	A	B	B	B	H	H	H	A	A	B	H	B	H	A	H	A	B	A	H	H	B	A	A	A	H	A	H	H	B	B	H	A	B	H	H	H	H	A	H	A	H	A	H	H
	A01	27323464	A	H	H	A	B	B	B	H	H	H	A	A	B	H	B	H	A	H	A	B	A	H	H	B	A	A	A	H	A	A	H	B	B	H	A	B	H	H	H	H	A	H	A	H	A	H	H
	A01	27323470	A	H	H	A	B	H	B	H	H	H	A	A	B	H	B	H	A	H	A	B	A	H	H	B	A	A	A	H	A	H	H	B	B	H	A	B	H	H	H	H	A	H	A	H	A	H	H
	A01	27323500	A	H	H	A	B	B	B	H	H	H	A	A	H	H	B	H	A	H	A	B	A	H	H	B	A	A	A	H	A	H	H	B	B	H	A	B	H	H	H	H	A	H	A	H	A	H	H
	A01	27323517	A	H	H	A	B	B	B	H	H	H	A	A	B	H	B	H	A	H	A	B	A	H	H	B	A	A	A	H	A	H	H	B	B	H	A	B	H	H	H	H	A	H	A	H	A	H	H
	A01	27395671	A	H	H	A	B	B	B	H	H	H	A	A	H	H	B	H	A	H	A	B	A	H	H	B	A	A	A	A	A	A	H	B	B	H	A	B	H	H	H	H	A	B	A	H	A	H	H
	A01	27395681	A	H	H	A	B	B	B	H	H	H	A	A	H	H	B	H	A	H	A	B	A	H	H	B	A	A	A	A	A	A	H	B	B	H	A	H	H	H	H	H	A	B	A	H	A	H	H
	A01	27395976	A	H	H	A	B	B	B	H	H	H	A	A	H	H	B	H	A	H	A	B	A	H	H	B	A	A	A	A	A	A	H	B	B	H	A	H	H	H	H	H	A	B	A	H	A	H	H
	A01	27395982	A	H	H	A	B	B	B	H	H	H	A	A	H	H	B	H	A	H	A	B	A	H	H	B	A	A	A	A	A	A	H	B	B	H	A	H	H	H	H	H	A	B	A	H	A	H	H
	A01	27396030	A	H	H	A	B	B	B	H	H	H	A	A	H	H	B	H	A	H	A	B	A	H	H	B	A	A	A	A	A	A	H	B	B	H	A	H	H	H	H	H	A	B	A	H	A	H	H
	A01	27402931	A	H	H	A	B	B	B	H	H	H	A	A	H	H	B	H	A	H	A	B	A	H	H	B	A	A	A	H	A	A	H	B	B	H	A	H	H	H	H	H	A	H	A	H	A	H	H
	A01	27403138	A	H	H	A	B	B	B	H	H	H	A	A	H	H	B	H	A	H	A	B	A	H	H	B	A	A	A	H	A	A	H	B	B	H	A	H	H	H	H	H	A	H	A	H	A	H	H
	A01	27403139	A	H	H	A	B	B	B	H	H	H	A	A	H	H	B	H	A	H	A	B	A	H	H	B	A	A	A	H	A	A	H	B	B	H	A	H	H	H	H	H	A	H	A	H	A	H	H
	A01	27403188	A	H	H	A	B	B	B	H	H	H	A	A	H	H	B	H	A	H	A	B	A	H	H	B	A	A	A	H	A	A	H	B	B	H	A	H	H	H	H	H	A	H	A	H	A	H	H
	A01	27406875	A	H	H	A	B	B	B	H	H	H	A	A	H	H	B	H	A	H	A	B	A	H	H	B	A	A	A	H	A	A	H	B	B	H	A	H	H	H	H	H	A	H	A	H	A	H	H
	A01	27406882	A	H	H	A	B	B	B	H	H	H	A	A	H	H	B	H	A	H	A	B	A	H	H	B	A	A	A	H	A	A	H	B	B	H	A	H	H	H	H	H	A	H	A	H	A	H	H
	A01	27407111	A	H	H	A	B	B	B	H	H	H	A	A	H	H	B	H	A	H	A	B	A	H	H	B	A	A	A	H	A	A	H	B	B	H	A	H	H	H	H	H	A	H	A	H	A	H	H
	A01	27407127	A	H	H	A	B	B	B	H	H	H	A	A	H	H	B	H	A	H	A	B	A	H	H	B	A	A	A	H	A	A	H	B	B	H	A	H	H	H	H	H	A	H	A	H	A	H	H
	A01	27579572	A	B	H	A	B	B	B	H	H	H	A	A	H	H	B	H	H	H	A	B	H	H	B	B	A	A	A	H	A	A	H	B	B	A	A	H	H	H	H	H	A	H	A	H	A	H	H
	A01	27579637	A	B	H	A	B	B	B	H	H	H	A	A	H	H	B	H	H	H	A	B	H	H	B	B	A	A	A	H	A	A	H	B	B	A	A	H	H	H	H	H	A	H	A	H	A	H	H
	A01	27579699	A	B	H	A	B	B	B	H	H	H	A	A	H	H	B	H	H	H	A	B	H	H	B	B	A	A	A	H	A	A	H	B	B	A	A	H	H	H	H	H	A	H	A	H	A	H	H
	A01	27597288	A	B	H	A	B	B	B	H	H	H	A	A	H	H	B	H	H	H	A	B	H	H	B	B	A	A	A	H	A	A	H	B	B	A	A	H	H	H	H	H	A	H	A	H	A	H	H
	A01	27681325	A	B	H	A	B	B	B	H	H	H	A	A	H	H	B	H	H	H	A	B	H	H	B	B	A	A	A	H	A	A	H	B	B	A	A	H	H	H	H	H	A	H	A	H	A	H	H
	A01	27681349	A	B	H	A	B	B	B	H	H	H	A	A	H	H	B	H	H	H	A	B	H	H	B	B	A	A	A	H	A	A	H	B	B	A	A	H	H	H	H	H	A	H	A	H	A	H	H
	A01	28043796	A	B	H	A	B	B	B	H	H	H	A	A	B	H	B	H	H	H	A	B	H	H	B	B	A	A	A	B	A	A	H	B	B	A	A	H	A	A	H	H	A	H	A	H	A	H	H
	A01	28043819	A	B	H	A	B	B	B	H	H	H	A	A	B	H	B	H	H	H	A	B	H	H	B	B	A	A	A	B	A	A	H	B	B	A	A	H	A	A	H	H	A	H	A	H	A	H	H
	A01	28043867	A	B	H	A	B	B	H	H	H	H	A	A	B	H	B	H	H	H	A	B	H	H	B	B	A	A	A	B	A	A	H	B	B	A	A	A	A	A	H	H	A	H	A	H	A	H	H
	A01	28092011	A	B	H	A	B	B	B	H	H	H	A	A	B	H	B	H	H	H	A	B	H	H	B	B	A	A	A	B	A	A	H	B	B	A	A	H	A	A	H	H	A	H	A	H	A	H	H
	A01	28312888	A	B	H	A	B	B	B	H	H	H	A	A	B	H	B	H	H	H	A	B	H	H	B	B	A	A	A	B	A	A	H	B	B	A	A	H	A	A	H	H	A	H	A	H	A	H	H
	A02	1066401	B	H	H	H	H	A	H	H	B	H	A	H	A	H	H	H	B	B	B	H	B	H	H	B	H	H	H	H	B	H	H	H	A	H	H	A	H	A	H	H	H	H	H	B	H	H	H
	A02	1066461	B	H	H	H	H	A	H	H	B	H	A	H	A	H	H	H	B	B	B	H	B	H	H	B	H	H	H	H	B	H	H	H	A	H	H	A	H	A	H	H	H	H	H	B	H	H	H
	A02	1066767	B	H	H	H	H	A	H	H	B	H	A	H	A	H	H	H	B	B	B	H	B	H	H	B	H	H	H	H	B	H	H	H	A	H	H	A	H	A	H	H	H	H	H	B	H	H	H
	A02	1078263	B	H	H	H	H	A	H	H	B	H	A	H	A	H	H	H	B	B	B	H	B	H	H	B	H	H	H	H	B	H	H	H	A	H	H	A	H	A	H	H	H	H	H	B	H	H	H
	A02	1104786	B	H	H	H	H	A	H	H	B	H	A	H	A	H	H	H	B	B	B	H	B	H	H	B	H	H	H	H	B	H	H	H	A	H	H	A	H	A	H	H	H	H	H	B	H	H	H
	A02	1137989	B	H	H	H	H	A	H	H	B	H	A	H	A	H	H	H	B	B	B	H	B	H	H	B	H	H	H	H	B	H	H	H	A	H	H	A	H	A	H	H	A	H	H	B	H	H	H
	A02	1484453	B	B	H	H	H	B	H	A	B	H	A	H	A	B	H	H	B	B	B	H	B	H	H	B	A	H	H	H	B	H	H	H	A	H	H	A	A	A	H	H	A	H	H	B	H	H	A
	A02	1484458	B	B	H	H	H	B	H	A	B	H	A	H	A	B	H	H	B	B	B	H	B	H	H	B	A	H	H	H	B	H	H	H	A	H	H	A	A	A	H	H	A	H	H	B	H	H	A
	A02	1617444	B	B	H	H	H	B	H	H	B	H	A	H	A	B	H	H	B	B	B	H	B	H	H	B	A	H	H	H	B	H	H	H	A	H	H	A	A	A	H	H	A	H	H	B	H	H	A
	A02	1617458	B	B	H	H	H	B	H	H	B	H	A	H	A	B	H	H	B	B	B	H	B	H	H	B	A	H	H	H	B	H	H	H	A	H	H	A	A	A	H	H	A	H	H	B	H	H	A
	A02	1645007	B	B	H	A	H	B	H	A	B	H	A	H	A	B	H	H	B	B	B	H	B	H	H	B	A	H	H	H	B	H	H	H	A	H	H	A	A	A	H	A	A	H	H	B	H	H	A
	A02	1645909	B	B	H	H	H	B	H	H	B	H	A	H	A	B	H	H	B	B	B	H	B	H	H	B	A	H	H	H	B	H	H	H	A	H	H	A	A	A	H	H	A	H	H	B	H	H	A
	A02	1650641	B	B	H	H	H	B	H	H	B	H	A	H	A	B	H	H	B	B	B	H	B	H	H	B	A	H	H	H	B	H	H	H	A	H	H	A	A	A	H	H	A	H	H	B	H	H	A
	A02	1650650	B	B	H	H	H	B	H	H	B	H	A	H	A	B	H	H	B	B	B	H	B	H	H	B	A	H	H	H	B	H	H	H	A	H	H	A	A	A	H	H	A	H	H	B	H	H	A
	A02	1650782	B	B	H	H	H	B	H	H	B	H	A	H	A	B	H	H	B	B	B	H	B	H	H	B	A	H	H	H	B	H	H	H	A	H	H	A	A	A	H	H	A	H	H	B	H	H	A
	A02	1675392	B	B	H	H	H	B	H	H	B	H	A	H	A	B	H	H	B	B	B	H	B	H	H	B	A	H	H	H	B	H	H	H	A	H	H	A	A	A	H	H	A	H	H	B	H	H	A
	A02	1675404	B	B	H	H	H	B	H	H	B	H	A	H	A	B	H	H	B	B	B	H	B	H	H	B	A	H	H	H	B	H	H	H	A	H	H	A	A	A	H	H	A	H	H	B	H	H	A
	A02	1681878	B	B	H	H	H	B	H	H	B	H	A	H	A	B	H	H	B	B	B	H	B	H	H	B	A	H	H	H	B	H	H	H	A	H	H	A	A	A	H	H	A	H	H	B	H	H	A
	A02	1732021	B	B	H	H	H	B	H	H	B	H	A	H	A	B	H	H	B	B	B	H	H	H	H	H	A	H	H	H	B	H	H	H	A	H	H	A	A	A	H	H	A	H	H	B	H	H	A
	A02	1813993	B	H	H	H	H	B	H	H	B	H	A	H	A	B	H	H	B	B	B	H	B	H	H	B	A	H	H	H	B	H	H	H	A	H	H	A	A	A	H	H	A	H	H	B	H	H	A
	A02	1837344	B	H	H	H	H	B	H	H	B	H	A	H	A	B	H	H	B	B	B	H	B	H	H	B	A	H	H	H	B	H	H	H	A	H	H	A	A	A	H	H	A	H	H	B	H	H	A
	A02	1837356	B	H	H	H	H	B	H	H	B	H	A	H	A	B	H	H	B	B	B	H	B	H	H	B	A	H	H	H	B	H	H	H	A	H	H	A	A	A	H	H	A	H	H	B	H	H	A
	A02	1837391	B	H	H	H	H	B	H	H	B	H	A	H	A	B	H	H	B	B	B	H	B	H	H	B	A	H	H	H	B	H	H	H	A	H	H	A	A	A	H	H	A	H	H	B	H	H	A
	A02	1837504	B	H	H	H	H	B	H	H	B	H	A	H	A	B	H	H	B	B	B	H	B	H	H	B	A	H	H	H	B	H	H	H	A	H	H	A	A	A	H	H	A	H	H	B	H	H	A
	A02	1837524	B	H	H	H	H	B	H	H	B	H	A	H	A	B	H	H	B	B	B	H	B	H	H	B	A	H	H	H	B	H	H	H	A	H	H	A	A	A	H	H	A	H	H	B	H	H	A
	A02	1837537	B	H	H	H	H	B	H	H	B	H	A	H	A	B	H	H	B	B	B	H	B	H	H	B	A	H	H	H	B	H	H	H	A	H	H	A	A	A	H	H	A	H	H	B	H	H	A
	A02	1837551	B	H	H	H	H	B	H	H	B	H	A	H	A	B	H	H	B	B	B	H	B	H	H	B	A	H	H	H	B	H	H	H	A	H	H	A	A	A	H	H	A	H	H	B	H	H	A
	A02	1995366	B	A	A	A	A	H	A	A	B	A	A	A	A	B	H	A	B	B	A	A	B	A	A	A	A	A	A	A	H	A	H	A	A	A	A	A	A	A	A	A	A	A	A	B	A	A	A
	A02	2071530	B	H	H	H	B	B	H	H	B	H	A	B	A	B	H	H	B	B	B	H	B	B	B	H	A	H	H	H	B	H	H	H	A	H	H	H	A	B	B	H	A	H	H	B	H	H	A
	A02	2275994	B	H	H	H	H	B	H	H	B	H	A	H	A	B	H	H	B	B	B	H	B	H	H	B	A	H	H	H	B	H	H	H	A	H	H	A	H	A	H	H	A	H	H	B	H	H	H
	A02	2276496	B	H	H	H	H	B	H	H	B	H	A	H	A	B	H	H	B	B	B	H	B	H	H	B	A	H	H	H	B	H	H	H	A	H	H	A	H	A	H	H	A	H	H	B	H	H	H
	A02	2541543	B	H	H	H	H	H	H	H	B	H	A	H	A	H	H	H	B	B	B	H	B	H	H	B	H	H	H	H	B	H	H	H	A	H	H	A	H	A	H	H	A	H	H	B	H	H	H
	A02	2541572	B	H	H	H	H	H	H	H	B	H	A	H	A	H	H	H	B	B	B	H	B	H	H	B	H	H	H	H	B	H	H	H	A	H	H	A	H	A	H	H	A	H	H	B	H	H	H
	A02	2541595	B	H	H	H	H	H	H	H	B	H	A	H	A	H	H	H	B	B	B	H	B	H	H	B	H	H	H	H	B	H	H	H	A	H	H	A	H	A	H	H	A	H	H	B	H	H	H
	A02	2565763	B	H	H	H	H	H	H	H	B	H	A	H	A	H	H	H	B	B	B	H	B	H	H	B	H	H	H	H	B	H	H	H	A	H	H	A	H	A	H	H	A	H	H	B	H	H	H
	A02	2565765	B	H	H	H	H	H	H	H	B	H	A	H	A	H	H	H	B	B	B	H	B	H	H	B	H	H	H	H	B	H	H	H	A	H	H	A	H	A	H	H	A	H	H	B	H	H	H
	A02	2565767	B	H	H	H	H	H	H	H	B	H	A	H	A	H	H	H	B	B	B	H	B	H	H	B	H	H	H	H	B	H	H	H	A	H	H	A	H	A	H	H	A	H	H	B	H	H	H
	A02	2565777	B	H	H	H	H	H	H	H	B	H	A	H	A	H	H	H	B	B	B	H	B	H	H	B	H	H	H	H	B	H	H	H	A	H	H	A	H	A	H	H	A	H	H	B	H	H	H
	A02	2566181	B	H	H	H	H	H	H	H	B	H	A	H	A	H	H	H	B	B	B	H	B	H	H	B	H	H	H	H	B	H	H	H	A	H	H	A	H	A	H	H	A	H	H	B	H	H	H
	A02	2640490	B	H	H	H	H	H	H	H	B	H	A	H	A	H	H	H	B	B	B	H	B	H	H	B	H	H	H	H	B	H	H	H	A	H	H	A	H	A	H	H	A	H	H	B	H	H	H
	A02	2640499	B	H	H	H	H	H	H	H	B	H	A	H	A	H	H	H	B	B	B	H	B	H	H	B	H	H	H	H	B	H	H	H	A	H	H	A	H	A	H	H	A	H	H	B	H	H	H
	A02	2640526	B	H	H	H	H	H	H	H	B	H	A	H	A	H	H	H	B	B	B	H	B	H	H	B	H	H	H	H	B	H	H	H	A	H	H	A	H	A	H	H	A	H	H	B	H	H	H
	A02	2640548	B	H	H	H	H	H	H	H	B	H	A	H	A	H	H	H	B	B	B	H	B	H	H	B	H	H	H	H	B	H	H	H	A	H	H	A	H	A	H	H	A	H	H	B	H	H	H
	A02	2640746	B	H	H	H	H	H	H	H	B	H	A	H	A	H	H	H	B	B	B	H	B	H	H	B	H	H	H	H	B	H	H	H	A	H	H	A	H	A	H	H	A	H	H	B	H	H	H
	A02	2640755	B	H	H	H	H	H	H	H	B	H	A	H	A	H	H	H	B	B	B	H	B	H	H	B	H	H	H	H	B	H	H	H	A	H	H	A	H	A	H	H	A	H	H	B	H	H	H
	A02	2640759	B	H	H	H	H	H	H	H	B	H	A	H	A	H	H	H	B	B	B	H	B	H	H	B	H	H	H	H	B	H	H	H	A	H	H	A	H	A	H	H	A	H	H	B	H	H	H
	A02	2640772	B	H	H	H	H	H	H	H	B	H	A	H	A	H	H	H	B	B	B	H	B	H	H	B	H	H	H	H	B	H	H	H	A	H	H	A	H	A	H	H	A	H	H	B	H	H	H
	A02	2663464	B	H	H	B	H	H	H	H	B	H	A	H	A	H	B	H	B	B	B	H	B	H	H	B	H	B	H	H	B	H	H	H	A	H	H	A	H	A	H	H	A	H	B	B	H	H	B
	A02	2689005	B	H	H	H	H	H	H	H	B	H	A	H	A	H	H	H	B	B	B	H	B	H	H	B	H	H	H	H	B	H	H	H	A	H	H	A	H	A	H	H	A	H	H	B	H	H	H
	A02	2689017	B	H	H	H	H	H	H	H	B	H	A	H	A	H	H	H	B	B	B	H	B	H	H	B	H	H	H	H	B	H	H	H	A	H	H	A	H	A	H	H	A	H	H	B	H	H	H
	A02	2689145	B	H	H	H	H	H	H	H	B	H	A	H	A	H	H	H	B	B	B	H	B	H	H	B	H	H	H	H	B	H	H	H	A	H	H	A	H	A	H	H	A	H	H	B	H	H	H
	A02	2689154	B	H	H	H	H	H	H	H	B	H	A	H	A	H	H	H	B	B	B	H	B	H	H	B	H	H	H	H	B	H	H	H	A	H	H	A	H	A	H	H	A	H	H	B	H	H	H
	A02	2689158	B	H	H	H	H	H	H	H	B	H	A	H	A	H	H	H	B	B	B	H	B	H	H	B	H	H	H	H	B	H	H	H	A	H	H	A	H	A	H	H	A	H	H	B	H	H	H
	A02	2689159	B	H	H	H	H	H	H	H	B	H	A	H	A	H	H	H	B	B	B	H	B	H	H	B	H	H	H	H	B	H	H	H	A	H	H	A	H	A	H	H	A	H	H	B	H	H	H
	A02	2689166	B	H	H	H	H	H	H	H	B	H	A	H	A	H	H	H	B	B	B	H	B	H	H	B	H	H	H	H	B	H	H	H	A	H	H	A	H	A	H	H	A	H	H	B	H	H	H
	A02	2721364	B	H	H	H	H	H	H	H	B	H	A	H	A	H	H	H	B	B	B	H	B	H	H	B	H	H	H	H	B	H	H	H	A	H	H	A	H	A	H	H	A	H	H	B	H	H	H
	A02	2906948	B	H	H	H	H	A	H	H	B	H	A	H	A	H	H	H	B	B	B	H	B	H	H	B	H	H	H	H	B	H	H	H	A	H	H	A	H	A	H	H	A	H	H	B	H	H	H
	A02	2907125	B	H	H	H	H	A	H	H	B	H	A	H	A	H	H	H	B	B	B	H	B	H	H	B	H	H	H	H	B	H	H	H	A	H	H	A	H	A	H	H	H	H	H	B	H	H	H
	A02	2926131	B	H	H	H	H	A	H	H	B	B	A	H	A	B	H	H	B	B	B	H	B	H	H	B	B	H	H	H	B	B	H	H	A	H	H	A	H	A	H	H	H	H	H	B	H	H	H
	A02	2926136	B	H	H	H	H	H	H	H	B	B	A	H	A	B	H	H	B	B	B	H	B	H	H	B	B	H	H	H	B	B	H	H	A	H	H	A	H	A	H	H	H	H	H	B	H	H	H
	A02	2926416	B	H	H	H	H	A	H	H	B	B	A	H	A	B	H	H	B	B	B	H	B	H	H	B	B	H	H	H	B	H	H	H	A	H	H	A	H	A	H	H	H	H	H	B	H	H	H
	A02	2973664	B	H	H	H	A	A	H	H	B	H	A	H	A	H	H	H	B	B	B	H	B	H	H	B	H	H	H	H	B	H	H	H	A	H	H	A	H	A	H	H	H	H	H	B	H	H	H
	A02	2974110	B	H	H	H	A	A	H	H	B	H	A	H	A	H	H	H	B	B	B	H	B	H	H	B	H	H	H	H	B	H	H	H	A	H	H	A	H	A	H	H	H	H	H	B	H	H	H
	A02	3045059	B	H	H	H	A	A	H	H	B	H	A	H	A	H	H	H	B	B	B	H	B	H	H	B	H	H	H	H	B	H	H	H	A	H	B	A	H	A	H	H	H	H	H	B	H	H	H
	A02	3045068	B	H	H	H	A	A	H	H	B	H	A	H	A	H	H	H	B	B	B	H	B	H	H	B	H	H	H	H	B	H	H	H	A	H	B	A	H	A	H	H	H	H	H	B	H	H	H
	A02	3045083	B	H	H	H	A	A	H	H	B	H	A	H	A	H	H	H	B	B	B	H	B	H	H	B	H	H	H	H	B	H	H	H	A	H	B	A	H	A	H	H	H	H	H	B	H	H	H
	A02	3045155	B	H	H	H	A	A	H	H	B	H	A	H	A	H	H	H	B	B	B	H	B	H	H	B	H	H	H	H	B	H	H	H	A	H	B	A	H	A	H	H	H	H	H	B	H	H	H
	A02	3045196	B	H	H	H	A	A	H	H	B	A	A	H	A	H	A	H	B	B	B	H	B	H	H	B	H	H	H	H	B	H	H	H	A	H	B	A	H	A	H	H	H	H	H	B	H	A	H
	A02	3045227	B	H	H	H	A	A	H	H	B	A	A	H	A	H	A	H	B	B	B	H	B	H	H	B	H	H	H	H	B	H	H	H	A	H	B	A	H	A	H	H	H	H	H	B	H	A	H
	A02	3045598	B	H	H	H	A	A	H	H	B	A	A	H	A	H	A	H	B	B	B	H	B	H	H	B	H	H	H	H	B	H	H	H	A	H	B	A	H	A	H	H	H	H	H	B	H	A	H
	A02	3076914	B	H	H	H	A	A	H	H	B	H	A	H	A	H	H	H	B	B	B	H	B	H	H	B	H	H	H	H	B	H	H	H	A	H	B	A	H	A	H	H	H	H	H	B	H	H	H
	A02	3077234	B	H	H	H	A	A	H	H	B	H	A	H	A	H	H	H	B	B	B	H	B	H	H	B	H	H	H	H	B	H	H	H	A	H	B	A	H	A	H	H	H	H	H	B	H	H	H
	A02	3080363	B	H	H	H	A	A	H	H	B	H	A	H	A	H	H	H	B	B	B	H	H	H	H	B	H	H	H	H	B	H	H	H	A	H	B	A	H	A	H	H	H	H	H	B	H	H	H
	A02	3390254	B	H	B	H	A	A	H	H	B	H	A	H	A	H	H	H	B	B	B	H	B	H	H	H	H	H	H	H	B	H	H	H	A	H	B	A	H	A	H	H	H	H	H	H	H	H	H
	A02	3436679	B	H	B	H	A	A	H	H	B	H	A	B	A	H	H	H	B	B	B	B	B	H	H	B	H	H	H	H	B	H	H	H	A	H	B	A	B	A	H	H	H	B	H	H	H	H	H
	A02	3732700	B	H	B	H	A	A	H	H	B	H	A	H	A	H	H	H	B	B	B	H	B	B	H	B	H	H	A	H	B	H	H	H	A	H	B	A	H	A	H	H	H	H	H	H	H	H	H
	A02	3732850	B	H	B	H	A	A	H	H	B	H	A	H	A	H	H	H	B	B	B	H	B	B	H	B	H	H	A	H	B	H	H	H	A	H	B	A	H	A	H	H	H	H	H	H	H	H	H
	A02	3732959	B	H	B	H	A	A	H	H	B	H	A	H	A	H	H	H	B	B	B	H	B	B	H	B	H	H	A	H	B	H	H	H	A	H	B	A	H	A	H	H	H	H	A	H	H	H	H
	A02	3732960	B	H	B	H	A	A	H	H	B	H	A	H	A	H	H	H	B	B	B	H	B	B	H	B	H	H	A	H	B	H	H	H	A	H	B	A	H	A	H	H	H	H	A	H	H	H	H
	A02	3733000	B	H	B	H	A	A	H	H	B	H	A	H	A	H	H	H	B	B	B	H	B	B	H	B	H	H	A	H	B	H	H	H	A	H	B	A	H	A	H	H	H	H	A	H	H	H	H
	A02	3733003	B	H	B	H	A	A	H	H	B	H	A	H	A	H	H	H	B	B	B	H	B	B	H	B	H	H	A	H	B	H	H	H	A	H	B	A	H	A	H	H	H	H	A	H	H	H	H
	A02	3756332	B	H	B	H	A	A	H	H	B	H	A	H	A	H	B	H	B	B	B	H	B	B	H	B	H	H	A	H	B	H	A	H	A	H	B	A	H	A	H	H	H	H	H	H	H	H	A
	A02	3783658	B	H	B	H	A	A	H	H	B	H	A	H	A	H	H	H	B	B	B	H	B	B	H	B	H	H	A	H	B	H	H	H	A	H	B	A	H	A	H	H	H	H	H	H	H	H	H
	A02	3919755	B	H	B	H	A	A	H	H	B	H	A	H	A	H	H	H	B	B	B	H	B	B	H	B	H	H	A	H	B	H	H	H	A	H	B	A	H	A	H	H	H	H	H	H	H	H	H
	A02	3920026	B	H	B	H	A	A	H	H	B	H	A	H	A	H	H	H	B	B	B	H	B	B	H	B	H	H	A	H	B	H	H	H	A	H	B	A	H	A	H	H	H	H	H	H	H	H	H
	A02	3920055	B	H	B	H	A	A	H	H	B	H	A	H	A	H	H	H	B	B	B	H	B	B	H	B	H	H	A	H	B	H	H	H	A	H	B	A	H	A	H	H	H	H	H	H	H	H	H
	A02	4068002	B	H	B	H	A	A	H	H	B	H	A	H	A	H	H	H	B	B	B	H	B	B	H	B	H	H	A	H	B	H	H	H	A	H	B	A	H	A	H	H	H	H	H	H	H	H	H
	A02	4068014	B	H	B	H	A	A	H	H	B	H	A	H	A	H	H	H	B	B	B	H	B	B	H	B	H	H	A	H	B	H	H	H	A	H	B	A	H	A	H	H	H	H	H	H	H	H	H
	A02	4068027	B	H	B	H	A	A	H	H	B	H	A	H	A	H	H	H	B	B	B	H	B	B	H	B	H	H	A	H	B	H	H	H	A	H	B	A	H	A	H	H	H	H	H	H	H	H	H
	A02	4068209	B	H	B	H	A	A	H	H	B	H	A	H	A	H	H	H	B	B	B	H	B	B	H	B	H	H	A	H	B	H	H	H	A	H	B	A	H	A	H	H	H	H	H	H	H	H	H
	A02	4107563	B	H	B	H	A	A	H	H	B	H	A	H	A	H	H	H	B	B	B	H	B	B	H	B	H	H	A	B	B	H	H	H	A	H	B	A	H	A	H	H	H	H	H	H	H	H	H
	A02	4107567	B	H	B	H	A	A	H	H	B	H	A	H	A	H	H	H	B	B	B	H	B	B	H	B	H	H	A	B	B	H	H	H	A	H	B	A	H	A	H	H	H	H	H	H	H	H	H
	A02	4115236	B	H	B	H	A	A	H	H	B	H	A	H	A	H	H	H	B	B	B	H	B	B	H	B	H	H	A	H	B	H	H	H	A	H	B	A	H	A	H	H	H	H	H	H	H	H	H
	A02	4115254	B	H	B	H	A	A	H	H	B	H	A	H	A	H	H	H	B	B	B	H	B	B	H	B	H	H	A	H	B	H	H	H	A	H	B	A	H	A	H	H	H	H	H	H	H	H	H
	A02	4118921	B	H	B	H	A	A	H	H	B	H	A	H	A	H	H	H	B	B	B	H	B	B	H	B	H	B	A	H	B	H	H	H	A	H	B	A	H	A	H	H	H	H	H	H	H	H	H
	A02	4118953	B	H	B	H	A	A	H	H	B	H	A	H	A	H	H	H	B	B	B	H	B	B	H	B	H	B	A	H	B	H	H	H	A	H	B	A	H	A	H	H	H	H	H	H	H	H	H
	A02	4118960	B	H	B	H	A	A	H	H	B	H	A	H	A	H	H	H	B	B	B	H	B	B	H	B	H	B	A	H	B	H	H	H	A	H	B	A	H	A	H	H	H	H	H	H	H	H	H
	A02	4119065	B	H	B	H	A	A	H	H	B	H	A	H	A	H	H	H	B	B	B	H	B	B	H	B	H	B	A	H	B	H	H	H	A	H	B	A	H	A	H	H	H	H	H	H	H	H	H
	A02	4119086	B	H	B	H	A	A	H	H	B	H	A	H	A	H	H	H	B	B	B	H	B	B	H	B	H	H	A	H	B	H	H	H	A	H	B	A	H	A	H	H	H	H	H	H	H	H	H
	A02	4123438	B	H	B	H	A	A	H	H	B	H	A	H	A	H	H	H	B	B	B	H	B	B	H	B	H	H	A	H	B	H	H	H	A	H	B	A	H	A	H	H	H	H	H	H	H	H	H
	A02	4123480	B	H	B	H	A	A	H	H	B	H	A	H	A	H	H	H	B	B	B	H	B	B	H	B	H	H	A	H	B	H	H	H	A	H	B	A	H	A	H	H	H	H	H	H	H	H	H
	A02	4123813	B	H	B	H	A	A	H	H	B	H	A	H	A	H	H	H	B	B	B	H	B	B	H	B	H	H	A	H	B	H	H	H	A	H	B	A	H	A	H	H	H	H	H	H	H	H	H
	A02	4123827	B	H	B	H	A	A	H	H	B	H	A	H	A	H	H	H	B	B	B	H	B	B	H	B	H	H	A	H	B	H	H	H	A	H	B	A	H	A	H	H	H	H	H	H	H	H	H
	A02	4123834	B	H	B	H	A	A	H	H	B	H	A	H	A	H	H	H	B	B	B	H	B	B	H	B	H	H	A	H	B	H	H	H	A	H	B	A	H	A	H	H	H	H	H	H	H	H	H
	A02	4153972	B	H	B	H	A	A	H	H	B	H	A	H	A	H	H	H	B	B	B	H	B	B	H	B	H	H	A	H	B	H	H	H	A	H	B	A	H	A	H	H	H	H	H	H	H	H	H
	A02	4153982	B	H	B	H	A	A	H	H	B	H	A	H	A	H	H	H	B	B	B	H	B	B	H	B	H	H	A	H	B	H	H	H	A	H	B	A	H	A	H	H	H	H	H	H	H	H	H
	A02	4365521	B	H	B	H	A	A	H	H	B	H	A	H	A	H	H	H	B	B	B	H	B	B	H	B	H	H	H	H	B	H	H	H	A	H	B	A	H	A	H	H	H	H	H	H	H	H	H
	A02	4365537	B	H	B	H	A	A	H	H	B	H	A	H	A	H	H	H	B	B	B	H	B	B	H	B	H	H	H	H	B	H	H	H	A	H	B	A	H	A	H	H	H	H	H	H	H	H	H
	A02	4365555	B	H	B	H	A	A	H	H	B	H	A	H	A	H	H	H	B	B	B	H	B	B	H	B	H	H	H	H	B	H	H	H	A	H	B	A	H	A	H	H	H	H	H	H	H	H	H
	A02	4365581	B	H	B	B	A	A	H	H	B	H	A	H	A	H	H	A	B	B	B	B	B	B	H	B	H	H	H	H	B	H	H	H	A	H	B	A	H	A	H	H	H	H	H	H	H	H	H
	A02	4366167	B	H	B	H	A	A	H	H	B	H	A	H	A	H	H	H	B	B	B	H	B	B	H	B	H	H	H	H	B	H	H	H	A	H	B	A	H	A	H	H	H	H	H	H	H	H	H
	A02	4784741	B	H	B	H	A	A	H	H	B	H	A	H	A	H	H	H	B	B	B	H	B	B	H	B	H	H	H	H	B	H	H	H	A	H	B	A	H	A	H	H	H	H	H	H	H	H	H
	A02	4879473	B	H	B	H	A	A	H	B	B	H	A	H	A	H	H	H	B	B	B	H	H	B	H	B	H	H	H	H	B	H	H	H	A	H	B	A	H	A	H	H	H	H	H	H	H	H	H
	A02	4926388	H	B	H	A	A	A	H	H	H	H	A	H	A	H	H	H	H	H	B	H	H	H	H	H	H	H	B	H	H	B	H	H	A	H	H	A	H	H	H	B	H	H	B	H	H	H	H
	A02	4926392	H	B	H	A	A	A	H	H	H	H	A	H	A	H	H	H	H	H	B	H	H	H	H	H	H	H	B	H	H	B	H	H	A	H	H	A	H	H	H	B	H	H	B	H	H	H	H
	A02	5130816	B	H	B	H	A	A	B	B	B	H	A	H	A	H	H	H	B	B	B	H	B	B	H	H	H	H	H	H	B	H	H	H	A	H	B	A	H	A	H	H	H	H	H	H	H	H	H
	A02	5130850	B	H	B	H	A	A	B	B	B	H	A	H	A	H	H	H	B	B	B	H	B	B	H	H	H	H	H	H	B	H	H	H	A	H	B	A	H	A	H	H	H	H	H	H	H	H	H
	A02	5268204	B	H	B	H	A	A	B	B	B	H	A	H	A	H	H	H	B	B	B	H	B	B	H	H	H	H	H	H	B	H	H	H	A	H	B	A	H	A	H	H	B	H	H	H	H	H	H
	A02	5268205	B	H	B	H	A	A	B	B	B	H	A	H	A	H	H	H	B	B	B	H	B	B	H	H	H	H	H	H	B	H	H	H	A	H	B	A	H	A	H	H	B	H	H	H	H	H	H
	A02	5268214	B	H	B	H	A	A	B	B	B	H	A	H	A	H	H	H	B	B	B	H	B	B	H	H	H	H	H	H	B	H	H	H	A	H	B	A	H	A	H	H	B	H	H	H	H	H	H
	A02	5268263	B	H	B	H	A	A	B	B	B	H	A	H	A	H	H	H	B	B	B	H	B	B	H	H	H	H	H	H	B	H	H	H	A	H	B	A	H	A	H	H	B	H	H	H	H	H	H
	A02	5268365	B	H	B	H	A	A	B	B	B	H	A	H	A	H	H	H	B	B	B	H	B	B	H	H	H	H	H	H	B	H	H	H	A	H	B	A	H	A	H	H	B	H	H	H	H	H	H
	A02	5442515	B	H	B	H	A	A	H	B	B	H	A	H	A	H	H	H	B	B	B	H	B	B	H	H	H	H	H	H	B	H	H	H	A	H	B	A	H	A	H	H	B	A	H	H	H	H	H
	A02	5573706	B	H	B	H	A	A	B	B	B	H	A	H	A	H	H	H	B	B	B	H	B	B	H	H	H	H	H	H	B	H	H	H	A	H	B	A	H	A	H	H	B	H	H	H	H	H	H
	A02	5585714	B	H	B	H	A	A	B	B	B	H	A	H	A	H	H	H	B	B	B	H	B	B	H	H	H	H	A	H	B	A	H	H	A	H	B	A	H	A	H	H	B	H	H	H	H	H	H
	A02	5585732	B	H	B	H	A	A	B	B	B	H	A	H	A	H	H	H	B	B	B	H	B	B	H	H	H	H	A	H	B	A	H	H	A	H	B	A	H	A	H	H	B	H	H	H	H	H	H
	A02	5585733	B	H	B	H	A	A	B	B	B	H	A	H	A	H	H	H	B	B	B	H	B	B	H	H	H	H	A	H	B	A	H	H	A	H	B	A	H	A	H	H	B	H	H	H	H	H	H
	A02	5585735	B	H	B	H	A	A	B	B	B	H	A	H	A	H	H	H	B	B	B	H	B	B	H	H	H	H	A	H	B	A	H	H	A	H	B	A	H	A	H	H	B	H	H	H	H	H	H
	A02	5585740	B	H	B	H	A	A	B	B	B	H	A	H	A	H	H	H	B	B	B	H	B	B	H	H	H	H	A	H	B	A	H	H	A	H	B	A	H	A	H	H	B	H	H	H	H	H	H
	A02	5593187	B	H	B	H	A	A	B	B	B	H	A	H	A	H	H	H	B	B	B	H	B	B	H	H	H	H	H	H	B	A	H	H	A	H	B	A	H	A	H	H	B	H	H	H	H	H	H
	A02	5593205	B	H	B	H	A	A	B	B	B	H	A	H	A	H	H	H	B	B	B	H	B	B	H	H	H	H	H	H	B	A	H	H	A	H	B	A	H	A	H	H	B	H	H	H	H	H	H
	A02	5935302	B	H	B	H	A	A	H	B	B	H	H	H	A	H	H	H	B	B	H	A	B	B	H	H	H	H	H	H	B	A	H	H	A	H	B	A	H	A	H	H	B	H	H	H	B	H	H
	A02	5935358	B	H	B	H	A	A	H	B	B	H	H	A	A	H	H	H	B	B	H	H	B	B	H	H	H	H	H	H	B	A	H	H	A	H	B	A	H	H	H	H	B	H	H	H	B	H	H
	A02	5935359	B	H	B	H	A	A	H	B	B	H	H	A	A	H	H	H	B	B	H	H	B	B	H	H	H	H	H	H	B	A	H	H	A	H	B	A	H	H	H	H	B	H	H	H	B	H	H
	A02	6058379	B	H	B	H	A	A	H	B	B	H	H	H	A	A	A	H	B	B	H	H	B	B	H	A	H	A	H	A	B	A	H	H	A	H	B	A	H	A	A	H	B	H	H	H	B	A	A
	A02	6058381	B	H	B	H	A	A	H	B	B	H	H	H	A	A	A	H	B	B	H	H	B	B	H	A	H	A	H	A	B	A	H	H	A	H	B	A	H	A	A	H	B	H	H	H	B	A	H
	A02	6095766	B	H	B	H	A	A	H	B	B	H	H	H	A	H	H	H	B	B	H	H	B	B	H	H	H	H	H	H	B	A	H	H	A	H	B	A	H	A	H	H	B	H	H	H	B	H	H
	A02	6095776	B	H	B	H	A	A	H	B	B	H	H	H	A	H	H	H	B	B	H	H	B	B	H	H	H	H	H	H	B	A	H	H	A	H	B	A	H	A	H	H	B	H	H	H	B	H	H
	A02	6121273	B	H	B	H	A	A	H	B	B	H	H	H	A	H	H	H	B	B	H	H	B	B	H	H	H	H	H	H	B	A	H	H	A	H	B	A	H	A	H	H	B	H	H	H	B	H	H
	A02	6121283	B	H	B	H	A	A	H	B	B	H	H	H	A	H	H	H	B	B	H	H	B	B	H	H	H	H	H	H	B	A	H	H	A	H	B	A	H	A	H	H	B	H	H	H	B	H	H
	A02	6121315	B	H	B	H	A	A	H	B	B	H	H	H	A	H	H	H	B	B	H	H	B	B	H	H	H	H	H	H	B	A	H	H	A	H	B	A	H	A	H	H	B	H	H	H	B	H	H
	A02	6121343	B	H	B	H	A	A	H	B	B	H	H	H	A	H	H	H	B	B	H	H	B	B	H	H	H	H	H	H	B	A	H	H	A	H	B	A	H	A	H	H	B	H	H	H	B	H	H
	A02	6121355	B	H	B	H	A	A	H	B	B	H	H	H	A	H	H	H	B	B	H	H	B	B	H	H	H	H	H	H	B	A	H	H	A	H	B	A	H	A	H	H	B	H	H	H	B	H	H
	A02	6121357	B	H	B	H	A	A	H	B	B	H	H	H	A	H	H	H	B	B	H	H	B	B	H	H	H	H	H	H	B	A	H	H	A	H	B	A	H	A	H	H	B	H	H	H	B	H	H
	A02	6121374	B	H	B	H	A	A	H	B	B	H	H	H	A	H	H	H	B	B	H	H	B	B	H	H	H	H	H	H	B	A	H	H	A	H	B	A	H	A	H	H	B	H	H	H	B	H	H
	A02	6121382	B	H	B	H	A	A	H	B	B	H	H	H	A	H	H	H	B	B	H	H	B	B	H	H	H	H	H	H	B	A	H	H	A	H	B	A	H	A	H	H	B	H	H	H	B	H	H
	A02	6367230	B	H	B	H	A	A	H	B	B	H	H	H	A	H	H	H	B	B	H	H	B	B	H	H	H	H	H	H	B	A	H	H	A	H	B	A	H	A	H	H	B	H	H	H	B	H	H
	A02	6367246	B	H	B	H	A	A	H	B	B	H	H	H	A	H	H	H	B	B	H	H	B	B	H	H	H	H	H	H	B	A	H	H	A	H	B	A	H	A	H	H	B	H	H	H	B	H	H
	A02	6367257	B	H	B	H	A	A	H	B	B	H	H	H	A	H	H	H	B	B	H	H	B	B	H	H	H	H	H	H	B	A	H	H	A	H	B	A	H	A	H	H	B	H	H	H	B	H	H
	A02	6367302	B	H	B	H	A	A	H	B	B	H	H	H	A	H	H	H	B	B	H	H	B	B	H	H	H	H	H	H	B	A	H	H	A	H	B	A	H	A	H	H	B	H	H	H	B	H	H
	A02	6367376	B	H	B	H	A	A	H	B	B	H	H	H	A	H	H	H	B	B	H	H	B	B	H	H	H	H	H	H	B	A	H	H	A	H	B	A	H	A	H	H	B	H	H	H	B	H	H
	A02	6367463	B	A	B	A	A	A	A	A	B	A	A	A	A	H	A	A	B	B	A	A	B	A	A	A	A	A	H	H	A	A	H	A	A	A	B	A	A	A	A	A	B	A	A	H	B	A	A
	A02	6535039	B	H	B	H	A	A	H	H	B	H	H	H	A	H	H	H	B	B	H	H	B	B	H	H	H	H	H	H	B	A	H	H	A	H	B	A	H	A	H	H	B	H	H	H	B	H	H
	A02	6535067	B	H	B	H	A	A	H	H	B	H	H	H	A	H	H	H	B	B	H	H	B	B	H	H	H	H	H	H	B	A	H	H	A	H	B	A	H	A	H	H	B	H	H	H	B	H	H
	A02	6564496	B	H	B	B	A	A	H	B	B	H	B	H	A	H	H	H	B	B	H	B	B	B	H	B	B	H	H	H	B	A	H	B	A	B	B	A	H	A	H	H	B	H	H	H	B	B	B
	A02	6564686	B	H	B	B	A	A	H	B	B	H	B	H	A	H	H	H	B	B	H	B	B	B	H	B	B	H	H	H	B	A	H	B	A	B	B	A	H	A	H	H	B	H	H	H	B	B	B
	A02	6564695	B	H	B	B	A	A	H	B	B	H	B	H	A	H	H	H	B	B	H	B	B	B	H	B	B	H	H	H	B	A	H	B	A	B	B	A	H	A	H	H	B	H	H	H	B	B	B
	A02	6590108	B	H	B	H	A	A	H	B	B	H	H	H	A	H	H	H	B	B	H	H	B	B	H	H	H	H	H	H	B	A	H	H	A	H	B	A	H	A	H	H	B	H	H	H	B	H	H
	A02	6590126	B	H	B	H	A	A	H	B	B	H	H	H	A	H	H	H	B	B	A	H	B	B	H	H	H	H	H	H	B	A	H	H	A	H	B	A	H	A	H	H	B	H	H	H	B	H	H
	A02	6697850	B	H	B	H	A	A	H	B	B	H	H	H	A	H	H	H	B	B	H	B	B	B	H	H	H	H	H	H	B	A	H	H	A	H	B	A	H	A	H	H	B	H	H	H	B	H	H
	A02	6697858	B	H	B	H	A	A	H	B	B	H	H	H	A	H	H	H	B	B	H	B	B	B	H	H	H	H	H	H	B	A	H	H	A	H	B	A	H	A	H	H	B	H	H	H	B	H	H
	A02	6697993	B	H	B	H	A	A	H	B	B	H	H	H	A	H	H	H	B	B	H	B	B	B	H	H	H	H	H	H	B	A	H	H	A	H	B	A	H	A	H	H	B	H	H	H	B	H	H
	A02	6711330	B	H	B	H	A	A	H	B	B	H	H	H	A	H	H	H	B	B	H	B	B	B	H	H	H	H	H	H	B	A	H	H	A	H	B	A	H	A	H	H	B	H	H	H	B	H	H
	A02	6820842	B	H	B	H	A	H	H	B	B	H	H	H	H	H	H	H	B	B	H	B	B	B	H	H	H	H	H	H	B	H	H	H	A	H	B	H	H	H	H	H	B	H	B	H	B	H	H
	A02	6820843	B	H	B	H	A	H	H	B	B	H	H	H	H	H	H	H	B	B	H	B	B	B	H	H	H	H	H	H	B	H	H	H	A	H	B	H	H	H	H	H	B	H	B	H	B	H	H
	A02	6820951	B	H	B	H	A	H	H	B	B	H	H	H	H	H	H	H	B	B	H	B	B	B	H	H	H	H	H	H	B	H	H	H	A	H	B	H	H	H	H	H	B	H	H	H	B	H	H
	A02	7146882	B	H	B	H	A	A	H	B	B	H	H	H	A	H	H	H	B	B	H	B	B	B	H	H	H	H	H	H	B	A	H	H	A	H	B	A	H	A	H	H	B	H	H	H	B	H	H
	A02	7258837	B	H	B	H	A	A	H	B	B	H	H	H	A	H	H	H	B	B	H	B	B	B	H	H	H	H	H	H	B	A	H	H	A	H	B	A	H	A	H	H	B	H	H	H	B	H	H
	A02	7332170	B	H	B	H	A	A	H	B	B	H	H	H	A	H	H	H	B	B	H	B	B	B	H	H	H	H	H	H	B	A	H	H	A	H	B	A	H	A	H	H	B	H	H	H	B	H	H
	A02	7332172	B	H	B	H	A	A	H	B	B	H	H	H	A	H	H	H	B	B	H	B	B	B	H	H	H	H	H	H	B	A	H	H	A	H	B	A	H	A	H	H	B	H	H	H	B	H	H
	A02	7507324	B	H	B	H	A	A	H	B	B	H	H	H	A	H	H	H	B	B	H	B	B	B	H	A	H	H	H	H	B	A	B	A	A	H	B	A	B	A	H	H	B	H	H	H	B	H	H
	A02	7507450	B	H	B	H	A	A	H	B	B	H	H	H	A	H	B	H	B	B	H	B	B	B	H	A	H	H	B	H	B	A	B	A	A	H	B	A	B	A	H	H	B	H	H	H	B	H	H
	A02	7507491	B	H	B	A	A	A	H	H	B	H	H	H	H	H	H	H	B	B	H	B	B	B	H	A	H	H	H	H	B	A	B	A	A	H	B	A	H	A	H	H	B	H	H	H	B	H	H
	A02	7566295	B	H	B	H	A	A	H	B	B	H	H	H	A	H	H	H	B	B	H	B	B	B	H	A	H	H	H	H	B	A	B	A	A	H	B	A	B	A	H	H	B	H	H	H	B	H	H
	A02	7593231	B	H	B	H	A	A	H	B	B	H	H	H	A	H	H	H	B	B	H	B	B	B	H	A	H	H	H	H	B	A	B	A	A	H	B	A	B	A	H	H	B	H	H	H	B	H	H
	A02	7715703	B	H	B	H	A	A	H	B	B	A	H	A	A	A	A	A	B	B	A	B	B	B	H	A	H	H	A	H	B	A	A	A	A	A	B	A	B	A	A	A	B	H	A	A	B	A	A
	A02	7881823	B	H	B	H	A	A	H	B	B	H	H	H	A	H	A	H	B	B	H	B	B	B	H	A	H	H	H	H	B	A	H	A	A	H	B	A	B	A	H	H	B	H	H	H	B	H	H
	A02	7881959	B	H	B	H	A	A	H	B	B	H	H	H	A	H	A	H	B	B	H	B	B	B	H	A	H	H	H	H	B	A	H	A	A	H	B	A	B	A	H	H	B	H	H	H	B	H	H
	A02	7881964	B	H	B	H	A	A	H	B	B	H	H	H	A	H	A	H	B	B	H	B	B	B	H	A	H	H	H	H	B	A	H	A	A	H	B	A	B	A	H	H	B	H	H	H	B	H	H
	A02	7881982	B	H	B	H	A	A	H	B	B	H	H	H	A	H	A	H	B	B	H	B	B	B	H	A	H	H	H	H	B	A	H	A	A	H	B	A	B	A	H	H	B	H	H	H	B	H	H
	A02	7882001	B	H	B	H	A	A	H	B	B	H	H	H	A	H	A	H	B	B	H	B	B	B	H	A	H	H	H	H	B	A	H	A	A	H	B	A	B	A	H	H	B	H	H	H	B	H	H
	A02	7882002	B	H	B	H	A	A	H	B	B	H	H	H	A	H	A	H	B	B	H	B	B	B	H	A	H	H	H	H	B	A	H	A	A	H	B	A	B	A	H	H	B	H	H	H	B	H	H
	A02	7976765	H	H	B	H	A	A	H	B	H	H	H	H	A	H	A	H	B	B	H	B	B	B	H	A	H	H	H	B	B	A	B	A	A	H	B	A	H	A	H	H	B	H	H	H	B	H	H
	A02	8047860	H	B	B	H	A	A	H	B	B	H	H	H	A	H	A	H	B	B	B	B	B	B	H	A	A	H	B	B	B	A	B	A	A	H	B	A	B	A	H	H	B	H	H	H	B	H	H
	A02	8047865	H	B	B	H	A	A	H	B	B	H	H	H	A	H	A	H	B	B	B	B	B	B	H	A	A	H	B	B	B	A	B	A	A	H	B	A	B	A	H	H	B	H	H	H	B	H	H
	A02	8340016	H	H	B	H	A	A	H	B	H	H	H	H	A	H	A	H	B	B	H	B	B	B	H	A	H	H	H	B	B	A	B	A	A	H	H	A	B	A	H	H	B	H	H	H	B	H	H
	A02	8340637	H	H	B	H	A	A	H	B	H	H	H	H	A	H	A	H	B	B	H	B	B	B	H	A	H	H	H	B	B	A	B	A	A	H	H	A	B	A	H	H	B	H	H	H	B	H	H
	A02	8396940	H	H	B	H	A	A	H	B	H	H	H	H	A	H	A	H	B	B	H	B	B	B	H	A	H	H	H	B	B	H	B	A	A	H	H	A	B	A	H	H	B	H	H	H	B	H	H
	A02	8589890	H	H	B	H	A	A	H	B	H	H	H	H	A	H	A	H	B	B	H	B	B	B	H	A	H	H	H	B	B	A	B	H	A	H	H	A	H	A	A	H	B	H	H	H	B	H	H
	A02	8619901	H	H	B	H	A	A	H	B	H	H	H	H	A	H	H	H	B	B	H	B	B	B	H	A	H	H	H	B	B	A	B	A	A	H	H	A	B	A	H	H	B	H	H	H	B	H	H
	A02	8619906	H	H	B	H	A	A	H	B	H	H	H	H	A	H	H	H	B	B	H	B	B	B	H	A	H	H	H	B	B	A	B	A	A	H	H	A	B	A	H	H	B	H	H	H	B	H	H
	A02	8619922	H	H	B	H	A	A	H	B	H	H	H	H	A	H	H	H	B	B	H	B	B	B	H	A	H	H	H	B	B	A	B	A	A	H	H	A	B	A	A	H	B	H	H	H	B	H	H
	A02	8619969	H	H	B	H	A	A	H	B	H	H	H	H	A	H	H	H	B	B	H	B	B	B	H	A	H	H	H	B	B	A	B	A	A	H	H	A	B	A	H	H	B	H	H	H	B	H	H
	A02	8655143	H	H	B	H	A	A	H	B	H	H	H	H	A	H	A	H	B	B	H	B	B	B	H	A	H	H	H	B	B	A	B	A	A	H	H	A	B	A	A	H	B	H	H	H	B	H	H
	A02	8811752	H	H	H	H	A	A	H	B	H	H	H	H	A	H	A	B	B	H	H	B	B	H	H	A	H	B	H	B	H	A	B	A	A	H	H	A	B	A	A	H	B	H	B	H	B	H	B
	A02	8812103	H	H	H	H	A	A	H	B	H	H	H	H	A	H	A	B	B	B	H	B	B	H	H	A	H	B	H	B	H	A	B	A	A	H	H	A	B	A	A	H	B	H	B	H	B	H	B
	A02	8847183	H	H	B	H	A	A	H	B	H	H	H	H	A	H	A	H	B	B	H	B	B	B	H	A	H	H	H	B	H	A	B	A	A	H	H	A	B	A	A	H	B	H	H	H	B	H	H
	A02	8948573	H	H	B	H	A	A	H	B	H	H	H	A	A	H	A	H	B	B	H	B	B	B	H	A	H	H	H	B	H	A	B	A	A	H	H	A	B	A	A	H	B	H	H	H	B	H	H
	A02	9080472	H	H	B	H	A	A	H	B	H	H	H	H	A	H	A	H	B	B	H	B	B	B	H	A	H	H	H	B	H	A	B	A	A	H	H	A	B	A	A	H	B	H	H	H	B	H	H
	A02	9080482	H	H	B	H	A	A	H	B	H	H	H	H	A	H	A	H	B	B	H	B	B	B	H	A	H	H	H	B	H	A	B	A	A	H	H	A	B	A	A	H	B	H	H	H	B	H	H
	A02	9080521	H	H	B	H	A	A	H	B	H	H	H	H	A	H	A	H	B	B	H	B	B	B	H	A	H	H	H	B	H	A	B	A	A	H	H	A	B	A	A	H	B	H	H	H	B	H	H
	A02	9080560	H	H	B	H	A	A	H	B	H	H	H	H	A	H	A	H	B	B	H	B	B	B	H	A	H	H	H	B	H	A	B	A	A	H	H	A	B	A	A	H	B	H	H	H	B	H	H
	A02	9080570	H	H	B	H	A	A	H	B	H	H	H	H	A	H	A	H	B	B	H	B	B	B	H	A	H	H	H	B	H	A	B	A	A	H	H	A	B	A	A	H	B	H	H	H	B	H	H
	A02	9080577	H	H	B	H	A	A	H	B	H	H	H	H	A	H	A	H	B	B	H	B	B	B	H	A	H	H	H	B	H	A	B	A	A	H	H	A	B	A	A	H	B	H	H	H	B	H	H
	A02	9080580	H	H	B	H	A	A	H	B	H	H	H	H	A	H	A	H	B	B	H	B	B	B	H	A	H	H	H	B	H	A	B	A	A	H	H	A	B	A	A	H	B	H	H	H	B	H	H
	A02	9284804	H	H	B	H	A	A	H	B	H	H	H	H	A	H	A	H	B	B	H	B	B	B	A	A	H	H	H	B	H	A	B	A	A	H	H	A	B	A	H	H	B	H	B	H	B	H	H
	A02	9284813	H	H	B	H	A	A	H	B	H	H	H	H	A	H	A	H	B	B	H	B	B	B	A	A	H	H	H	B	H	A	B	A	A	H	H	A	B	A	H	H	B	H	B	H	B	H	H
	A02	9284814	H	H	B	H	A	A	H	B	H	H	H	H	A	H	A	H	B	B	H	B	B	B	A	A	H	H	H	B	H	A	B	A	A	H	H	A	B	A	H	H	B	H	B	H	B	H	H
	A02	9315266	H	H	B	H	A	A	H	B	H	H	H	H	A	A	A	H	B	B	H	B	B	B	A	A	H	H	H	B	H	A	B	A	A	H	H	A	B	A	H	H	B	H	B	H	B	H	H
	A02	9315376	H	H	B	H	A	A	H	B	H	H	H	H	A	A	A	H	B	B	H	B	B	B	A	A	H	H	H	B	H	A	B	A	A	H	H	A	B	A	H	H	B	H	B	H	B	H	H
	A02	9315417	A	H	B	H	A	A	H	B	H	H	H	H	A	A	A	H	B	B	H	B	B	B	A	A	H	H	H	B	H	A	H	A	A	H	H	A	B	A	H	H	B	H	B	H	B	H	H
	A02	9315840	A	H	B	H	A	A	H	B	H	H	H	H	A	A	A	H	B	B	H	B	B	B	A	A	H	H	H	B	H	A	H	A	A	H	H	A	B	A	H	H	B	H	B	H	B	H	H
	A02	9315848	A	H	B	H	A	A	H	B	H	H	H	H	A	A	A	H	B	B	H	B	B	B	A	A	H	H	H	B	H	A	H	A	A	H	H	A	B	A	H	H	B	H	B	H	B	H	H
	A02	9430643	H	H	B	H	A	A	H	B	H	H	H	H	A	A	A	H	B	B	H	B	B	B	H	A	H	H	H	B	H	A	B	A	A	H	H	A	B	A	H	H	B	H	B	H	B	H	H
	A02	9441231	H	H	B	H	A	A	H	B	H	H	H	H	A	A	A	H	B	B	H	B	B	B	A	A	H	H	H	B	H	A	B	A	A	H	H	A	B	A	H	H	B	H	B	H	B	H	H
	A02	9465502	H	H	B	H	A	A	H	B	H	H	H	H	A	A	A	H	B	B	H	B	B	B	A	A	H	H	H	B	H	A	B	A	A	H	H	A	B	A	H	H	B	H	B	H	B	H	H
	A02	9663963	H	H	B	H	A	A	H	B	H	H	H	H	A	A	A	H	B	B	H	B	B	B	A	A	H	H	H	B	H	A	B	A	A	H	H	A	B	A	H	H	B	H	B	H	B	H	H
	A02	9841933	H	H	B	H	A	A	H	B	H	H	H	H	A	A	A	H	B	B	H	B	B	B	A	A	H	H	H	B	H	A	H	A	A	H	H	A	B	A	H	H	B	H	B	H	B	H	H
	A02	9958477	H	H	B	H	A	A	H	B	H	H	H	H	A	A	A	H	B	B	H	B	B	B	A	A	H	H	H	B	H	A	B	A	A	H	H	A	B	A	H	H	B	H	B	H	B	H	H
	A02	9958509	H	H	B	H	A	A	H	B	H	H	H	H	A	A	A	H	B	B	H	B	B	B	A	A	H	H	H	B	H	A	B	A	A	H	H	A	B	A	H	H	B	H	B	H	B	H	H
	A02	9985556	H	H	B	H	A	A	H	B	H	H	H	H	A	A	A	H	B	B	H	B	B	B	A	A	H	H	H	B	H	A	H	A	A	H	H	A	B	A	H	H	B	H	B	H	B	H	H
	A02	9986071	H	H	B	H	A	A	H	H	H	H	H	H	A	A	A	H	B	B	H	B	B	B	A	A	H	H	H	B	H	A	B	A	A	H	H	A	B	A	H	H	B	H	B	H	B	H	H
	A02	9986397	H	H	B	H	A	A	H	H	H	H	H	H	A	A	A	H	B	B	H	B	B	B	A	A	H	H	H	B	H	A	B	A	A	H	H	A	B	A	H	H	B	H	B	H	B	H	H
	A02	9986426	H	H	B	H	A	A	H	H	H	H	H	H	A	A	A	H	B	B	H	B	B	B	A	A	H	H	H	B	H	A	B	A	A	H	H	A	B	A	H	H	B	H	B	H	B	H	H
	A02	9986453	H	H	B	H	A	A	H	H	H	H	H	H	A	A	A	H	B	B	H	B	B	B	A	A	H	H	H	B	H	A	B	A	A	H	H	A	B	A	H	H	B	H	B	H	B	H	H
	A02	9986454	H	H	B	H	A	A	H	H	H	H	H	H	A	A	A	H	B	B	H	B	B	B	A	A	H	H	H	B	H	A	B	A	A	H	H	A	B	A	H	H	B	H	B	H	B	H	H
	A02	10521874	H	H	H	H	A	A	H	H	B	H	H	H	A	A	A	H	B	H	H	B	B	B	A	A	H	H	H	B	H	A	B	A	A	H	H	A	B	A	H	H	B	H	B	H	B	H	H
	A02	10590787	H	H	H	H	A	A	H	B	H	H	H	H	A	A	A	H	B	H	H	B	B	B	A	A	H	H	H	B	H	A	B	A	A	H	H	A	B	A	H	H	B	H	B	H	B	H	H
	A02	10590979	H	H	H	H	A	A	H	B	H	H	H	H	A	A	A	H	B	H	H	B	B	B	A	A	H	H	H	B	H	A	B	A	A	H	H	A	B	A	H	H	B	H	B	H	B	H	H
	A02	10590982	H	H	H	H	A	A	H	B	H	H	H	H	A	A	A	H	B	H	H	B	B	B	A	A	H	H	H	B	H	A	B	A	A	H	H	A	B	A	H	H	B	H	B	H	B	H	H
	A02	11020528	H	H	H	H	A	A	H	B	H	H	H	H	A	A	A	H	B	H	H	B	B	B	A	A	H	H	H	B	H	A	B	A	A	H	H	A	B	A	H	H	B	H	B	H	B	H	H
	A02	11020582	H	H	H	H	A	A	H	B	H	H	H	H	A	A	A	H	B	H	H	B	B	B	A	A	H	H	H	B	H	A	B	A	A	H	H	A	B	A	H	H	B	H	B	H	B	H	H
	A02	11020770	H	H	H	H	A	A	H	B	H	H	H	H	A	A	A	H	B	H	H	B	B	B	A	A	H	H	H	B	H	A	B	A	A	H	H	A	B	A	H	H	B	H	B	H	B	H	H
	A02	11162561	H	H	H	H	A	A	H	B	H	H	H	H	A	A	A	H	B	H	H	B	B	B	A	A	H	H	H	B	H	A	H	A	A	H	H	A	B	A	H	H	B	H	B	H	B	H	H
	A02	11162969	H	H	H	H	A	A	H	B	H	H	H	H	A	A	A	H	B	H	H	B	B	B	A	A	H	H	H	B	H	A	B	A	A	H	H	A	B	A	H	H	B	H	B	H	B	H	H
	A02	11188150	H	H	H	H	A	A	H	B	H	H	H	H	A	A	A	H	B	H	H	B	B	B	A	A	H	H	H	B	H	A	B	A	A	H	H	A	B	A	H	H	B	H	B	H	B	H	H
	A02	11188332	H	H	H	H	A	A	H	B	H	H	H	H	A	A	A	H	B	H	H	B	B	B	A	A	H	H	H	B	H	A	B	A	A	H	H	A	B	A	H	H	B	H	B	H	B	H	H
	A02	11188337	H	H	H	H	A	A	H	B	H	H	H	H	A	A	A	H	B	H	H	B	B	B	A	A	H	H	H	B	H	A	B	A	A	H	H	A	B	A	H	H	B	H	B	H	B	H	H
	A02	11319052	H	H	H	H	A	A	H	B	H	H	H	H	A	A	A	H	B	H	H	B	B	B	A	A	H	H	H	B	H	A	B	A	A	H	H	A	B	A	H	H	B	H	B	H	B	H	H
	A02	11319069	H	H	H	H	A	A	H	B	H	H	H	H	A	A	A	H	B	H	H	B	B	B	A	A	H	H	H	B	H	A	B	A	A	H	H	A	B	A	H	H	B	H	B	H	B	H	H
	A02	11319077	H	H	H	H	A	A	H	B	H	H	H	H	A	A	A	H	B	H	H	B	B	B	A	A	H	H	H	B	H	A	B	A	A	H	H	A	B	A	H	H	B	H	B	H	B	H	H
	A02	11334735	H	H	H	H	A	A	H	B	H	H	H	H	A	A	A	H	B	H	H	B	B	B	A	A	H	H	H	B	H	A	B	A	A	H	H	A	B	A	H	H	B	H	B	H	B	H	H
	A02	11606950	B	B	B	B	A	A	A	B	A	A	B	A	A	A	A	B	B	B	B	B	B	B	A	A	B	B	A	B	A	A	B	A	A	A	B	A	B	A	A	B	B	B	B	A	B	B	B
	A02	11762842	H	H	H	H	A	A	H	H	H	H	H	H	A	A	A	B	B	H	H	B	B	B	A	A	H	H	H	B	H	A	B	H	A	H	H	A	B	A	H	H	B	H	B	H	B	H	H
	A02	11999135	H	H	H	H	A	A	H	B	H	H	H	H	A	A	A	B	B	H	H	B	B	B	A	A	H	H	H	B	H	A	B	A	A	H	H	A	B	A	H	H	B	H	B	H	B	A	H
	A02	12036445	H	H	H	H	A	A	H	H	H	H	H	H	A	A	A	B	B	H	H	B	B	B	H	A	H	H	H	B	H	A	B	A	A	H	H	A	B	A	H	H	B	H	B	H	B	H	H
	A02	12036463	H	H	H	H	A	A	H	H	H	H	H	H	A	A	A	B	B	H	H	B	B	B	H	A	H	H	H	B	H	A	B	A	A	H	H	A	B	A	H	H	B	H	B	H	B	H	H
	A02	12239073	H	H	H	H	A	A	H	B	H	H	H	H	A	A	A	B	B	H	H	B	B	B	A	A	H	H	H	B	H	A	B	A	A	H	H	A	B	A	H	H	B	H	B	H	B	H	H
	A02	12239085	H	H	H	H	A	A	H	B	H	H	H	H	A	A	A	B	B	H	H	B	B	B	A	A	H	H	H	B	H	A	B	A	A	H	H	A	B	A	H	H	B	H	B	H	B	H	H
	A02	12239098	H	H	H	H	A	A	H	B	H	H	H	H	A	A	A	B	B	H	H	B	B	B	A	A	H	H	H	B	H	A	B	A	A	H	H	A	B	A	H	H	B	H	B	H	B	H	H
	A02	12239322	H	H	H	H	A	A	H	B	H	H	H	H	A	A	A	B	B	H	H	B	B	B	A	A	H	H	H	B	H	A	B	A	A	H	H	A	B	A	H	H	B	H	B	H	B	H	H
	A02	12239324	H	H	H	H	A	A	H	B	H	H	H	H	A	A	A	B	B	H	H	B	B	B	A	A	H	H	H	B	H	A	B	A	A	H	H	A	B	A	H	H	B	H	B	H	B	H	H
	A02	12481561	H	B	H	H	A	A	H	B	H	H	H	H	A	A	A	B	B	H	H	B	B	B	A	A	H	H	H	B	H	A	B	A	A	H	H	A	B	A	H	H	B	H	B	H	B	H	H
	A02	12481648	H	B	H	H	A	A	H	B	H	H	H	H	A	A	A	B	B	H	H	B	B	B	A	A	H	H	H	B	H	A	B	A	A	H	H	A	B	A	H	H	B	H	B	H	B	H	H
	A02	12547853	H	H	H	H	A	A	H	H	H	H	H	H	A	A	A	B	B	H	H	B	B	B	A	A	H	B	H	B	H	H	B	A	A	H	H	A	B	A	H	H	B	H	B	H	H	H	H
	A02	12608097	H	H	H	H	A	A	H	B	H	H	H	H	A	A	A	B	B	H	H	B	B	B	A	A	H	B	H	B	H	A	B	A	A	H	H	A	B	A	H	H	B	H	B	H	B	H	H
	A02	12663356	H	H	H	H	A	A	H	B	H	H	H	H	A	A	A	B	B	H	H	B	H	H	A	A	H	B	H	B	H	A	B	A	A	H	H	A	B	A	H	H	B	H	B	H	B	H	H
	A02	12663364	H	H	H	H	A	A	H	B	H	H	H	H	A	A	A	B	B	H	H	B	H	H	A	A	H	B	H	B	H	A	B	A	A	H	H	A	B	A	H	H	B	H	B	H	B	H	H
	A02	12663392	H	H	H	H	A	A	H	B	H	H	H	H	A	A	A	B	B	H	H	B	H	H	A	A	H	B	H	B	H	A	B	A	A	H	H	A	B	A	H	H	B	H	B	H	B	H	H
	A02	12663396	H	H	H	H	A	A	H	B	H	H	H	H	A	A	A	B	B	H	H	B	B	H	A	A	H	B	H	B	H	A	B	A	A	H	H	A	B	A	H	H	B	H	B	H	B	H	H
	A02	12663687	H	H	H	H	A	A	H	B	H	H	H	H	A	A	A	B	B	H	H	B	B	H	A	A	H	B	H	B	H	A	B	A	A	H	H	A	B	A	H	H	B	H	B	H	B	H	H
	A02	12838900	H	H	H	H	A	A	H	B	H	H	H	A	A	A	A	B	B	H	H	B	B	H	A	A	H	B	H	B	H	A	B	A	A	H	H	A	B	A	H	H	B	H	B	H	B	H	H
	A02	13024550	H	A	H	A	A	A	H	B	H	A	H	A	A	A	A	B	B	A	H	B	H	H	A	A	A	B	H	B	H	A	H	A	A	H	H	A	B	A	H	H	B	H	B	A	B	H	A
	A02	13024554	H	A	H	A	A	A	H	B	H	A	H	A	A	A	A	B	B	A	H	B	H	H	A	A	A	B	H	B	H	A	H	A	A	H	H	A	B	A	H	H	B	H	B	A	B	H	A
	A02	13024557	H	A	H	A	A	A	H	B	H	A	H	A	A	A	A	B	B	A	H	B	H	H	A	A	A	B	H	B	H	A	H	A	A	H	H	A	B	A	H	H	B	H	B	A	B	H	A
	A02	13024558	H	A	H	A	A	A	H	B	H	A	H	A	A	A	A	B	B	A	H	B	H	H	A	A	A	B	H	B	H	A	H	A	A	H	H	A	B	A	H	H	B	H	B	A	B	H	A
	A02	13024562	H	A	H	A	A	A	H	B	H	A	H	A	A	A	A	B	B	A	H	B	H	H	A	A	A	B	H	B	H	A	H	A	A	H	H	A	B	A	H	H	B	H	B	A	B	H	A
	A02	13024573	H	A	A	A	A	A	H	B	H	A	H	A	A	A	A	B	B	A	H	B	H	A	A	A	A	B	H	B	H	A	H	A	A	H	H	A	B	A	H	H	H	H	B	A	H	H	A
	A02	13024577	H	A	H	A	A	A	H	B	H	A	H	A	A	A	A	B	B	A	H	B	H	H	A	A	A	B	H	B	H	A	H	A	A	H	H	A	B	A	H	H	B	H	B	A	B	H	A
	A02	13163796	H	H	H	H	A	A	H	B	H	H	H	A	A	A	A	B	B	H	H	B	B	H	A	A	H	B	H	B	H	A	B	A	A	H	H	A	B	A	H	H	B	H	B	H	B	H	H
	A02	13163818	H	H	H	H	A	A	H	B	H	H	H	A	A	A	A	B	B	H	H	B	B	H	A	A	H	B	H	B	H	A	B	A	A	H	H	A	B	A	H	H	B	H	B	H	B	H	H
	A02	13164106	H	H	H	H	A	A	H	B	H	H	H	A	A	A	A	B	B	H	H	B	B	H	A	A	H	B	H	B	H	A	B	A	A	H	H	A	B	A	H	H	B	H	B	H	B	H	H
	A02	13252129	A	A	B	A	A	B	A	A	A	A	A	B	A	A	B	A	A	A	A	B	B	B	A	B	A	A	A	B	A	A	A	B	A	B	A	B	B	A	B	B	B	A	B	B	B	B	B
	A02	13254748	H	H	H	H	A	A	H	B	H	H	H	A	A	A	A	B	B	H	H	B	B	H	A	A	H	B	H	B	H	A	B	A	A	H	H	A	B	A	A	H	B	H	B	H	B	H	H
	A02	13320274	H	H	H	H	A	A	H	B	H	H	H	A	A	A	A	B	B	H	H	B	B	H	A	A	H	B	H	B	H	A	B	A	A	H	H	A	B	A	H	H	B	H	B	H	B	H	H
	A02	13486863	H	H	H	H	A	A	H	B	H	H	H	A	A	A	A	H	B	H	H	B	H	H	A	A	H	B	H	B	H	A	B	A	A	H	H	A	B	A	H	H	B	H	B	H	B	H	H
	A02	13486912	H	H	H	H	A	A	H	B	H	H	H	A	A	A	A	H	B	H	H	B	H	H	A	A	H	B	H	B	H	A	B	A	A	H	H	A	B	A	H	H	B	H	B	H	B	H	H
	A02	13544511	H	H	H	H	A	A	H	B	H	H	H	A	A	A	A	H	B	H	H	B	H	H	A	A	H	B	H	B	H	A	B	A	A	H	H	A	B	A	H	H	B	H	B	H	B	H	H
	A02	13544526	H	H	H	H	A	A	H	B	H	H	H	A	A	A	A	H	B	H	H	B	H	H	A	A	H	B	H	B	H	A	B	A	A	H	H	A	B	A	H	H	B	H	B	H	B	H	H
	A02	13917202	H	H	H	H	A	A	H	H	H	H	H	A	A	A	A	B	B	H	H	B	B	H	A	A	H	B	H	B	H	A	H	A	A	H	H	A	B	A	H	H	B	H	B	H	B	H	H
	A02	13917244	H	H	H	H	A	A	H	H	H	H	H	A	A	A	A	B	B	H	H	B	B	H	A	A	H	B	H	B	H	A	H	A	A	H	H	A	B	A	H	H	B	H	B	H	B	H	H
	A02	13917310	H	H	H	H	A	A	H	H	H	H	H	A	A	A	A	B	B	H	H	B	B	H	A	A	H	B	H	B	H	A	H	A	A	H	H	A	B	A	H	H	B	H	B	H	B	H	H
	A02	13917331	H	H	H	H	A	A	H	H	H	H	H	A	A	A	A	B	B	H	H	B	B	H	A	A	H	B	H	B	H	A	H	A	A	H	H	A	B	A	H	H	B	H	B	H	B	H	H
	A02	13917372	H	H	H	H	A	A	H	H	H	H	H	A	A	A	A	B	B	H	H	B	B	H	A	A	H	B	H	B	H	A	H	A	A	H	H	A	B	A	H	H	B	H	B	H	B	H	H
	A02	13972701	B	B	H	H	A	A	H	B	H	B	H	A	A	A	H	B	B	H	B	B	B	H	A	A	H	B	H	B	H	A	B	A	A	H	H	A	B	A	H	H	B	H	B	H	B	H	B
	A02	13972757	H	B	H	H	A	A	H	B	H	B	H	A	A	A	H	B	B	H	B	B	B	H	A	A	H	B	H	B	H	A	B	A	A	H	H	A	B	A	H	H	B	H	B	H	B	H	H
	A02	13972760	H	B	H	H	A	A	H	B	H	B	H	A	A	A	H	B	B	H	B	B	B	H	A	A	H	B	H	B	H	A	B	A	A	H	H	A	B	A	H	H	B	H	B	H	B	H	H
	A02	13972770	H	B	H	H	A	A	H	B	H	B	H	A	A	A	H	B	B	H	B	B	B	H	A	A	H	B	H	B	H	A	B	A	A	H	H	A	B	A	H	H	B	H	B	H	B	H	H
	A02	13972771	H	B	H	H	A	A	H	B	H	B	H	A	A	A	H	B	B	H	B	B	B	H	A	A	H	B	H	B	H	A	B	A	A	H	H	A	B	A	H	H	B	H	B	H	B	H	H
	A02	13972773	H	B	H	H	A	A	H	B	H	B	H	A	A	A	H	B	B	H	B	B	B	H	A	A	H	B	H	B	H	A	B	A	A	H	H	A	B	A	H	H	B	H	B	H	B	H	H
	A02	13972779	H	B	H	H	A	A	H	B	H	B	H	A	A	A	H	B	B	H	B	B	B	H	A	A	H	B	H	B	H	A	B	A	A	H	H	A	B	A	H	H	B	H	B	H	B	H	H
	A02	14112246	H	H	H	H	A	A	H	B	H	H	H	A	A	A	A	B	B	H	H	B	B	H	A	A	H	B	H	B	H	A	B	A	A	H	H	A	B	A	H	H	B	H	B	H	B	H	H
	A02	14112248	H	H	H	H	A	A	H	B	H	H	H	A	A	A	A	B	B	H	H	B	B	H	A	A	H	B	H	B	H	A	B	A	A	H	H	A	B	A	H	H	B	H	B	H	B	H	H
	A02	14112272	H	H	H	H	A	A	H	B	H	H	H	A	A	A	A	B	B	H	H	B	B	H	A	A	H	B	H	B	H	A	B	A	A	H	H	A	B	A	H	H	B	H	B	H	B	H	H
	A02	14112291	H	H	H	H	A	A	H	B	H	H	H	A	A	A	A	B	B	H	H	B	B	H	A	A	H	B	H	B	H	A	B	A	A	H	H	A	B	A	H	H	B	H	B	H	B	H	H
	A02	14112459	H	H	H	H	A	A	H	B	H	H	H	A	A	A	A	B	B	H	H	B	B	H	A	A	H	B	H	B	H	A	B	A	A	H	H	A	B	A	H	H	B	H	B	H	B	H	H
	A02	14112503	H	H	H	H	A	A	H	B	H	H	H	A	A	A	A	B	B	H	H	B	B	H	A	A	H	B	H	B	H	A	B	A	A	H	H	A	B	A	H	H	B	H	B	H	B	H	H
	A02	14112504	H	H	H	H	A	A	H	B	H	H	H	A	A	A	A	B	B	H	H	B	B	H	A	A	H	B	H	B	H	A	B	A	A	H	H	A	B	A	H	H	B	H	B	H	B	H	H
	A02	14112513	H	H	A	H	A	A	H	B	H	H	H	A	A	A	A	B	B	H	H	B	B	H	A	A	H	B	H	B	H	A	B	A	A	H	H	A	B	A	H	H	B	H	B	H	B	H	H
	A02	14112532	H	H	H	H	A	A	H	B	H	H	H	A	A	A	A	B	B	H	H	B	B	H	A	A	H	B	H	B	H	A	B	A	A	H	H	A	B	A	H	H	B	H	B	H	B	H	H
	A02	14112534	H	H	H	H	A	A	H	B	H	H	H	A	A	A	A	B	B	H	H	B	B	H	A	A	H	B	H	B	H	A	B	A	A	H	H	A	B	A	H	H	B	H	B	H	B	H	H
	A02	14179815	H	H	H	H	A	A	H	B	H	H	H	A	A	A	A	B	B	H	H	B	B	H	A	A	H	B	H	B	H	A	B	A	A	H	H	A	B	A	H	H	B	H	B	H	B	H	H
	A02	14213274	H	H	H	A	A	A	H	B	H	H	H	A	A	A	A	B	B	H	H	B	B	H	A	A	H	B	H	B	H	A	B	A	A	H	H	A	B	A	H	H	B	H	B	H	B	H	H
	A02	14213285	H	H	H	A	A	A	H	B	H	H	H	A	A	A	A	B	B	H	H	B	B	H	A	A	H	B	H	B	H	A	B	A	A	H	H	A	B	A	H	H	B	H	B	H	B	H	H
	A02	14213333	H	H	H	A	A	A	H	B	H	H	H	A	A	A	A	B	B	H	H	B	B	H	A	A	H	B	H	B	H	A	B	A	A	H	H	A	B	A	H	H	B	H	B	H	B	H	H
	A02	14213412	H	H	H	A	A	A	H	B	H	H	H	A	A	A	A	B	B	H	H	B	B	H	A	A	H	B	H	B	H	A	B	A	A	H	H	A	B	A	H	H	B	H	B	H	B	H	H
	A02	14493317	H	H	H	H	A	A	H	B	H	H	H	A	A	A	H	H	B	H	H	B	H	H	A	A	H	B	H	B	H	A	H	A	A	H	H	A	B	H	H	H	B	H	B	H	B	H	H
	A02	14493334	H	H	H	H	A	A	H	H	H	H	H	A	A	A	H	H	B	H	H	B	H	H	A	A	H	B	H	B	H	A	H	A	A	H	H	A	B	H	H	H	B	H	B	H	B	H	H
	A02	14493431	H	H	H	H	A	A	H	H	H	H	H	A	A	A	H	H	B	H	H	B	H	H	A	A	H	B	H	B	H	A	H	A	A	H	H	A	B	H	H	H	B	H	B	H	B	H	H
	A02	14493437	H	H	H	H	A	A	H	H	H	H	H	A	A	A	H	H	B	H	H	B	H	H	A	A	H	B	H	B	H	A	H	A	A	H	H	A	B	H	H	H	B	H	B	H	B	H	H
	A02	14493488	H	H	H	H	A	A	H	H	H	H	H	A	A	A	H	H	B	H	H	B	H	H	A	A	H	B	H	B	H	A	H	A	A	H	H	A	B	H	H	H	B	H	B	H	B	H	H
	A02	14538090	H	H	H	H	A	A	H	B	H	H	H	A	A	A	A	B	B	H	H	B	H	H	A	A	H	B	H	B	H	A	B	A	A	H	H	A	B	A	H	H	B	H	B	H	B	H	H
	A02	14538106	H	H	H	H	A	A	H	B	H	H	H	A	A	A	A	B	B	H	H	B	H	H	A	A	H	B	H	B	H	A	B	A	A	H	H	A	B	A	H	H	B	H	B	H	B	H	H
	A02	14538367	H	H	H	H	A	A	H	B	H	H	H	A	A	A	A	B	B	H	H	B	H	H	A	A	H	B	H	B	H	A	B	A	A	H	H	A	B	A	H	H	B	H	B	H	B	H	H
	A02	14665630	H	H	H	H	A	A	H	H	H	H	H	A	A	A	A	B	B	H	H	B	H	H	A	A	H	B	H	B	H	H	B	A	A	H	H	A	B	A	H	H	B	H	B	H	B	H	H
	A02	14665650	H	H	H	H	A	A	H	H	H	H	H	A	A	A	A	B	B	H	H	B	H	H	A	A	H	B	H	B	H	H	B	A	A	H	H	A	B	A	H	H	B	H	B	H	B	H	H
	A02	14665668	H	H	H	H	A	A	H	H	H	H	H	A	A	A	A	B	B	H	H	B	H	H	A	A	H	B	H	B	H	H	B	A	A	H	H	A	B	A	H	H	B	H	B	H	B	H	H
	A02	14665673	H	H	H	H	A	A	H	H	H	H	H	A	A	A	A	B	B	H	H	B	H	H	A	A	H	B	H	B	H	H	B	A	A	H	H	A	B	A	H	H	B	H	B	H	B	H	H
	A02	15341624	H	H	H	H	A	A	H	B	H	H	H	A	H	A	A	B	B	H	H	B	H	H	A	A	H	B	H	B	H	A	B	A	A	H	H	A	B	A	H	H	B	H	B	H	B	H	H
	A02	15405245	H	H	H	H	A	A	B	H	H	H	H	A	H	A	A	B	B	H	H	B	H	H	A	A	H	B	H	B	H	A	H	A	A	H	H	A	B	A	H	A	B	H	B	H	B	H	H
	A02	15405295	H	H	H	H	A	A	B	H	H	H	H	A	H	A	A	B	B	H	H	B	H	H	A	A	H	B	H	B	H	A	H	A	A	H	H	A	B	A	H	A	B	H	B	H	B	H	H
	A02	15462532	H	H	H	H	A	H	H	H	H	H	A	H	H	H	H	B	B	H	H	B	H	H	H	A	A	A	A	H	A	A	B	H	H	H	A	H	H	H	H	H	H	A	H	H	B	H	H
	A02	15521716	H	H	H	H	A	A	B	B	B	B	B	A	H	A	A	B	B	H	H	B	H	B	A	A	H	B	H	B	H	A	B	B	A	H	H	A	B	A	H	B	B	H	B	B	B	H	H
	A02	15521717	H	H	H	H	A	A	B	B	B	B	B	A	H	A	A	B	B	H	H	B	H	B	A	A	H	B	H	B	H	A	B	B	A	H	B	A	B	A	H	B	B	H	B	B	B	H	H
	A02	15521966	H	H	H	H	A	A	B	B	B	B	B	A	H	A	A	B	B	H	H	B	H	H	A	A	H	B	H	B	H	A	B	A	A	H	H	A	B	A	H	B	B	H	B	B	B	H	H
	A02	15674605	H	H	H	H	A	A	H	H	H	H	H	A	H	A	A	B	B	H	H	B	H	H	A	A	H	B	H	B	H	A	B	H	A	H	H	A	B	A	H	H	B	H	B	H	B	H	B
	A02	15790916	H	H	H	H	A	A	H	H	H	H	H	A	H	A	A	B	B	H	H	B	H	H	A	A	H	B	H	B	H	A	B	H	A	H	H	A	B	A	H	H	B	H	B	H	B	H	B
	A02	15811970	H	H	H	H	A	A	H	B	H	H	H	A	H	A	A	B	B	H	H	B	B	H	H	A	H	B	H	B	H	A	B	H	A	H	H	A	B	A	H	H	B	H	B	H	B	H	B
	A02	15811980	H	H	H	H	A	A	H	B	H	H	H	A	H	A	A	B	B	H	H	B	B	H	H	A	H	B	H	B	H	A	B	H	A	H	H	A	B	A	H	H	B	H	B	H	B	H	B
	A02	15811993	H	H	H	H	A	A	H	B	H	H	H	A	H	A	A	B	B	H	H	B	B	H	H	A	H	B	H	B	H	A	B	H	A	H	H	A	B	A	H	H	B	H	B	H	B	H	B
	A02	15812182	H	H	H	H	A	A	H	B	H	H	H	A	H	A	A	B	B	H	H	B	B	H	H	A	H	B	H	B	H	A	B	H	A	H	H	A	B	A	H	H	B	H	B	H	B	H	B
	A02	15812192	H	H	H	H	A	A	H	B	H	H	H	A	H	A	A	B	B	H	H	B	B	H	H	A	H	B	H	B	H	A	B	H	A	H	H	A	B	A	H	H	B	H	B	H	B	H	B
	A02	15856548	H	H	H	H	A	A	H	B	H	H	H	A	H	A	A	B	B	H	H	B	B	H	A	A	H	B	H	B	H	A	B	H	A	H	H	A	B	A	H	H	B	H	B	H	B	H	B
	A02	15915804	H	H	H	H	A	A	H	B	H	H	H	A	H	A	A	B	B	H	H	B	B	H	A	A	H	B	H	B	H	A	B	H	A	H	H	A	B	A	H	H	B	H	B	H	B	H	B
	A02	15955114	H	H	H	H	A	A	H	B	H	H	H	A	H	A	A	B	B	H	H	B	H	H	A	A	H	B	H	B	H	A	B	H	A	H	H	A	B	A	H	H	B	H	B	H	B	H	B
	A02	15955121	H	H	H	H	A	A	H	B	H	H	H	A	H	A	A	B	B	H	H	B	H	H	A	A	H	B	H	B	H	A	B	H	A	H	H	A	B	A	H	H	B	H	B	H	B	H	B
	A02	16023738	H	H	H	H	A	A	H	B	H	H	H	A	H	A	A	B	B	H	H	B	H	H	A	A	H	B	H	B	H	A	B	H	A	H	H	A	B	A	H	H	B	H	B	H	B	H	B
	A02	16023818	H	H	H	H	A	A	H	B	H	H	H	A	H	A	A	B	B	H	A	B	B	H	A	A	H	B	H	B	H	A	B	H	A	H	H	A	B	A	H	H	B	H	B	H	B	A	B
	A02	16024878	H	H	H	H	A	A	H	B	H	H	H	A	H	A	A	B	B	H	H	B	B	H	A	A	H	B	H	B	H	A	B	H	A	H	H	A	B	A	H	H	B	H	B	H	B	H	B
	A02	16024897	H	H	H	H	A	A	H	B	H	H	H	A	H	A	A	B	B	H	H	B	B	H	A	A	H	B	H	B	H	A	B	H	A	H	H	A	B	A	H	H	B	H	B	H	B	H	B
	A02	16024940	H	H	H	B	A	A	B	B	B	H	H	A	H	A	A	B	B	B	H	B	B	H	A	A	H	B	B	B	H	A	B	H	A	H	H	A	B	A	H	H	B	H	B	B	B	B	B
	A02	16024941	H	H	H	B	A	A	B	B	B	H	H	A	B	A	A	B	B	H	H	B	B	H	A	A	H	B	B	B	H	A	B	H	A	H	H	A	B	A	H	H	B	H	B	B	B	B	B
	A02	16024947	H	H	H	H	A	A	H	B	H	H	H	A	H	A	A	B	B	H	H	B	B	H	A	A	H	B	H	B	H	A	B	H	A	H	H	A	B	A	H	H	B	H	B	H	B	H	B
	A02	16024963	H	H	H	H	A	A	H	B	H	H	H	A	H	A	A	B	B	H	H	B	B	H	A	A	H	B	H	B	H	A	B	H	A	H	H	A	B	A	H	H	B	H	B	H	B	H	B
	A02	16026496	H	H	H	H	A	A	H	B	H	H	H	A	H	A	A	B	B	H	H	B	B	H	A	A	H	B	H	B	H	A	B	H	A	H	H	A	B	A	H	H	B	H	B	H	B	H	B
	A02	16029133	H	H	H	H	A	A	H	B	H	H	H	A	H	A	A	B	B	H	H	B	B	H	A	A	H	B	H	B	H	A	B	H	A	H	H	A	B	A	H	H	B	H	B	H	B	H	B
	A02	16029255	H	H	H	H	A	A	H	B	H	H	H	A	H	A	A	B	B	H	H	B	B	H	A	A	H	B	H	B	H	A	B	H	A	H	H	A	B	A	H	H	B	H	B	H	B	H	B
	A02	16107800	H	H	H	H	A	A	H	B	H	H	H	A	H	A	A	B	B	H	H	B	B	H	A	A	H	B	H	B	H	A	B	H	A	H	H	A	B	A	H	H	B	H	B	H	B	H	B
	A02	16148236	H	H	H	H	A	A	H	B	H	H	H	A	H	A	A	B	B	H	H	B	B	H	A	A	H	B	H	B	H	A	B	H	A	H	H	A	B	A	H	H	B	H	B	H	B	H	B
	A02	16148250	H	H	H	H	A	A	H	B	H	H	H	A	H	A	A	B	B	H	H	B	B	H	A	A	H	B	H	B	H	A	B	H	A	H	H	A	B	A	H	H	B	H	B	H	B	H	B
	A02	16715902	H	H	H	H	A	A	H	B	H	H	H	A	H	A	A	B	B	H	H	B	B	H	A	A	H	B	H	B	H	A	B	H	A	H	H	A	B	A	H	H	B	H	B	H	B	H	B
	A02	16725059	A	H	B	A	H	H	H	A	A	A	H	A	H	A	B	H	A	H	A	B	A	B	A	B	A	A	A	H	H	H	H	B	H	A	H	H	H	H	H	B	B	A	A	H	H	H	B
	A02	17195099	H	H	H	H	A	A	H	B	H	H	H	A	H	A	A	B	B	H	H	B	B	H	A	A	H	B	H	B	H	A	B	H	A	H	H	A	B	A	H	H	B	H	B	H	B	H	B
	A02	17378764	H	H	H	H	A	A	H	B	H	H	H	A	H	A	A	B	B	H	H	B	B	H	A	A	H	B	H	B	H	A	H	H	A	H	H	A	B	A	H	H	B	H	B	H	B	H	B
	A02	17920672	H	H	H	H	A	A	H	B	H	H	H	A	H	A	H	B	B	H	H	B	B	H	A	A	H	B	H	B	H	A	B	H	A	H	H	A	B	A	H	H	B	H	B	H	B	B	B
	A02	17920676	H	H	H	H	A	A	H	B	H	H	H	A	H	A	H	B	B	H	H	B	B	H	A	A	H	B	H	B	H	A	B	H	A	H	H	A	B	A	H	H	B	H	B	H	B	B	B
	A02	18341974	H	H	H	H	A	A	H	B	H	H	H	A	H	A	A	B	B	H	H	B	H	H	A	A	H	B	H	B	H	A	H	H	A	H	H	A	B	A	H	H	B	H	B	H	B	H	H
	A02	18441185	H	H	H	H	A	A	H	B	H	H	H	A	H	A	A	B	B	H	H	B	B	H	A	A	H	B	H	B	H	A	B	H	A	H	H	A	B	A	H	H	B	H	B	H	B	H	B
	A02	18441278	H	H	H	H	A	A	H	B	H	H	H	A	H	A	A	B	B	H	H	B	B	H	A	A	H	B	H	B	H	A	B	H	A	H	H	A	B	A	H	H	B	H	B	H	B	H	B
	A02	18453870	H	H	H	H	A	A	H	B	H	H	H	A	H	A	A	B	B	H	H	B	B	H	A	A	H	B	H	B	H	A	B	H	A	H	H	A	B	A	H	H	B	H	B	H	B	H	B
	A02	18502409	H	H	H	H	A	A	H	B	H	H	H	A	H	A	A	B	B	H	H	B	B	H	A	A	H	B	H	B	H	A	B	H	A	H	H	A	B	A	H	H	B	H	B	H	B	H	B
	A02	18717651	H	H	H	H	A	A	H	H	H	H	H	A	H	A	A	B	B	H	H	B	B	H	A	A	H	B	H	B	A	A	B	H	A	H	H	A	B	H	H	H	B	H	B	H	H	H	B
	A02	18727645	H	H	H	H	A	A	H	B	H	H	H	A	H	A	A	B	B	H	H	H	B	H	A	A	H	B	H	B	H	A	B	H	A	H	H	A	H	A	H	H	B	H	B	H	B	H	B
	A02	18734714	H	H	H	H	A	A	H	B	H	H	H	A	H	A	A	B	B	H	H	B	B	H	A	A	H	B	H	B	H	A	B	H	A	H	H	A	B	A	H	H	B	H	B	H	B	H	B
	A02	18734718	H	H	H	H	A	A	H	B	H	H	H	A	H	A	A	B	B	H	H	B	B	H	A	A	H	B	H	B	H	A	B	H	A	H	H	A	B	A	H	H	B	H	B	H	B	H	B
	A02	18771337	H	H	H	H	A	A	H	B	H	H	H	A	H	A	A	H	B	H	H	B	B	H	A	A	H	B	H	B	H	A	B	H	A	H	H	A	B	A	H	H	B	H	B	H	B	H	B
	A02	18771553	H	H	H	H	A	A	H	B	H	H	H	A	H	A	A	B	B	H	H	B	B	H	A	A	H	B	H	B	H	A	B	H	A	H	H	A	B	A	H	H	B	H	B	H	B	H	B
	A02	18772069	H	H	H	H	A	A	H	B	H	H	H	A	H	A	A	B	B	H	H	B	B	H	A	A	H	B	H	B	H	A	B	H	A	H	H	A	B	A	H	H	B	H	B	H	B	H	B
	A02	18818418	H	H	H	H	A	A	H	B	H	H	H	A	H	A	A	B	B	H	H	B	B	H	A	A	H	B	H	B	H	A	B	H	A	H	H	A	B	A	H	H	B	H	B	H	B	H	B
	A02	18818423	H	H	H	H	A	A	H	B	H	H	H	A	H	A	A	B	B	H	H	B	B	H	A	A	H	B	H	B	H	A	B	H	A	H	H	A	B	A	H	H	B	H	B	H	B	H	B
	A02	18818426	H	H	H	H	A	A	H	B	H	H	H	A	H	A	A	B	B	H	H	B	B	H	A	A	H	B	H	B	H	A	B	H	A	H	H	A	B	A	H	H	B	H	B	H	B	H	B
	A02	18818451	H	H	H	H	A	A	H	B	H	H	H	A	H	A	A	B	B	H	H	B	B	H	A	A	H	B	H	B	H	A	B	H	A	H	H	A	B	A	H	H	B	H	B	H	B	H	B
	A02	18818474	H	H	H	H	A	A	H	B	H	H	H	A	H	A	A	B	B	H	H	B	B	H	A	A	H	B	H	B	H	A	B	H	A	H	H	A	B	A	H	H	B	H	B	H	B	H	B
	A02	18818568	H	H	H	H	A	A	H	B	H	H	H	A	H	A	A	B	B	H	H	B	B	H	A	A	H	B	H	B	H	A	B	H	A	H	H	A	B	A	H	H	B	H	B	H	B	H	B
	A02	18818580	H	H	H	H	A	A	H	B	H	H	H	A	H	A	A	B	B	H	H	B	B	H	A	A	H	B	H	B	H	A	B	H	A	H	H	A	B	A	H	H	B	H	B	H	B	H	B
	A02	18818589	H	H	H	H	A	A	H	B	H	H	H	A	H	A	A	B	B	H	H	B	B	H	A	A	H	B	H	B	H	A	B	H	A	H	H	A	B	A	H	H	B	H	B	H	B	H	B
	A02	18818615	H	H	H	H	A	A	H	B	H	H	H	A	H	A	A	B	B	H	H	B	B	H	A	A	H	B	H	B	H	A	B	H	A	H	H	A	B	A	H	H	B	H	B	H	B	H	B
	A02	18826302	H	H	H	H	A	A	H	B	H	H	H	A	H	A	A	B	B	H	H	B	B	H	A	A	H	B	H	B	H	A	B	H	A	H	H	A	B	A	H	H	B	H	B	H	B	H	B
	A02	19056583	H	H	H	H	A	A	H	B	H	H	H	A	H	A	A	B	B	H	H	B	H	H	A	A	H	B	H	B	H	A	B	H	A	H	H	A	B	A	H	H	B	H	B	H	B	H	B
	A02	19056761	H	H	H	H	A	A	H	B	H	H	H	A	H	A	A	B	B	H	H	B	B	H	A	A	H	B	H	B	H	A	B	H	A	H	H	A	B	A	H	H	B	H	B	H	B	H	B
	A02	19220624	H	H	H	H	A	A	H	B	H	H	H	A	H	A	A	B	B	H	H	B	B	H	A	A	H	B	H	B	H	A	B	H	A	H	H	A	B	A	H	H	B	H	B	B	B	H	B
	A02	19233045	H	H	H	H	A	A	H	B	H	H	H	A	H	A	A	B	B	H	H	B	B	H	A	A	H	B	H	B	H	A	B	H	A	H	H	A	B	A	H	H	B	H	B	H	B	H	B
	A02	19838012	H	B	H	H	A	A	H	B	H	H	H	A	B	H	A	B	B	H	B	B	H	A	A	H	H	B	H	B	H	A	H	H	A	H	B	A	B	A	H	H	B	H	B	H	B	H	B
	A02	20060339	H	H	H	H	A	A	H	B	H	H	H	A	B	H	A	B	B	H	H	B	H	A	A	H	H	B	H	B	H	A	H	H	A	H	B	A	B	A	H	H	B	H	B	H	B	H	B
	A02	20068499	H	H	H	H	A	A	H	B	H	H	H	A	B	H	A	B	B	H	H	B	H	A	A	H	H	B	H	B	H	A	H	H	A	H	B	A	B	H	H	H	B	H	B	H	B	H	B
	A02	20068611	H	H	H	H	A	A	H	B	H	H	H	A	B	H	A	B	B	H	H	B	H	A	A	H	H	B	H	B	H	A	H	H	A	H	B	A	B	H	H	H	B	H	B	H	B	H	B
	A02	20406410	H	H	H	H	A	A	H	B	H	H	H	A	H	H	A	B	B	H	H	B	H	A	A	A	H	B	H	B	H	A	B	H	A	H	B	A	B	A	H	H	B	H	B	H	B	H	B
	A02	20853031	H	H	H	H	A	A	H	B	H	H	H	A	H	A	H	B	B	H	H	B	H	A	A	A	H	B	H	B	H	A	H	H	A	B	B	A	H	A	H	H	B	H	B	H	H	H	B
	A02	21399545	H	B	H	H	A	A	H	B	H	H	H	A	B	H	A	H	B	H	H	B	H	A	A	H	H	B	H	B	H	A	H	H	A	H	B	A	B	A	H	H	B	H	B	H	H	H	B
	A02	21443799	H	B	H	H	A	A	H	B	H	H	H	A	B	H	A	H	B	H	H	B	H	A	A	H	H	B	H	B	H	A	H	H	A	H	B	A	B	A	H	H	B	H	B	H	H	H	B
	A02	21570791	H	B	H	H	A	A	H	H	H	H	H	A	B	H	A	B	B	H	H	B	H	A	A	H	H	B	B	B	H	A	H	H	A	H	B	A	B	A	H	H	B	H	B	H	B	H	B
	A02	21570959	H	B	H	H	A	A	H	H	H	H	H	A	B	H	A	B	B	H	H	B	H	A	A	H	H	B	B	B	H	A	H	H	A	H	B	A	B	A	H	H	B	H	B	H	B	H	B
	A02	21570977	H	B	H	H	A	A	H	H	H	H	H	A	B	H	A	B	B	H	H	B	H	A	A	H	H	B	B	B	H	A	H	H	A	H	B	A	B	A	H	H	B	H	B	H	B	H	B
	A02	21848019	H	B	H	H	A	A	H	B	H	H	H	A	B	H	A	H	B	H	H	B	H	A	A	H	H	B	H	B	H	A	H	H	A	H	B	A	B	A	H	H	B	H	B	H	B	H	B
	A02	21848324	H	B	H	H	A	A	H	B	H	H	H	A	B	H	A	H	B	H	H	B	H	A	A	H	H	B	H	B	H	A	H	H	A	H	B	A	B	A	H	H	B	H	B	H	B	H	B
	A02	21850872	H	B	H	H	A	A	H	B	H	H	H	A	B	H	A	B	B	H	H	B	B	A	A	H	H	B	H	B	H	A	H	H	A	H	B	A	B	A	H	H	B	H	B	H	B	H	B
	A02	21850879	H	B	H	H	A	A	H	B	H	H	H	A	B	H	A	B	B	H	H	B	B	A	A	H	H	B	H	B	H	A	H	H	A	H	B	A	B	A	H	H	B	H	B	H	B	H	B
	A02	21850883	H	B	H	H	A	A	H	B	H	H	H	A	B	H	A	B	B	H	H	B	B	A	A	H	H	B	H	B	H	A	H	H	A	H	B	A	B	A	H	H	B	H	B	H	B	H	B
	A02	21850900	H	B	H	H	A	A	H	B	H	H	H	A	B	H	A	B	B	H	H	B	B	A	A	H	H	B	H	B	H	A	H	H	A	H	B	A	B	A	H	H	B	H	B	H	B	H	B
	A02	21850907	H	B	H	H	A	A	H	B	H	H	H	A	B	H	A	B	B	H	H	B	B	A	A	H	H	B	H	B	H	A	H	H	A	H	B	A	B	A	H	H	B	H	B	H	B	H	B
	A02	21851177	H	B	H	H	A	A	H	B	H	H	H	A	B	H	A	B	B	H	H	B	B	A	A	H	H	B	H	B	H	A	H	H	A	H	B	A	B	A	H	H	B	H	B	H	B	H	B
	A02	21985559	H	H	H	H	A	A	H	H	H	H	H	A	H	H	A	H	H	H	H	H	B	A	A	H	H	H	H	B	H	A	H	H	A	H	H	A	H	H	H	A	H	H	B	A	B	H	B
	A02	21992018	H	B	H	H	A	A	H	B	H	H	H	A	B	H	A	B	B	H	H	B	B	A	A	H	H	B	H	B	H	A	H	H	A	H	B	A	B	A	H	H	B	H	B	H	B	H	B
	A02	22053366	H	B	H	H	A	A	H	H	H	H	H	A	B	H	H	H	B	H	H	B	B	A	A	H	H	B	H	B	H	A	H	H	A	H	B	A	B	A	H	H	B	H	B	H	B	H	B
	A02	22053367	H	B	H	H	A	A	H	H	H	H	H	A	B	H	H	H	B	H	H	B	B	A	A	H	H	B	H	B	H	A	H	H	A	H	B	A	B	A	H	H	B	H	B	H	B	H	B
	A02	22053374	H	B	H	H	A	A	H	B	H	H	H	A	B	H	H	H	B	H	H	B	B	A	A	H	H	B	H	B	H	A	H	H	A	H	B	A	B	A	H	H	B	H	B	H	B	H	B
	A02	22245815	H	B	H	H	A	A	H	B	H	H	H	A	B	H	A	H	B	H	H	B	B	A	A	H	H	B	H	B	H	A	H	H	A	H	B	A	B	A	H	H	B	H	B	H	B	H	B
	A02	22246234	H	B	H	H	A	A	H	B	H	H	H	A	B	H	A	H	B	H	H	B	B	A	A	H	H	B	H	B	H	A	H	H	A	H	B	A	B	A	H	H	B	H	B	H	B	H	B
	A02	22246237	H	B	H	H	A	A	H	B	H	H	H	A	B	H	A	H	B	H	H	B	B	A	A	H	H	B	H	B	H	A	H	H	A	H	B	A	B	A	H	H	B	H	B	H	B	H	B
	A02	22300376	H	B	H	H	A	A	H	B	H	H	H	A	B	H	A	B	B	H	H	B	B	A	A	H	H	B	H	B	H	A	H	H	A	H	B	A	B	A	H	H	B	H	B	H	B	H	B
	A02	22380148	H	B	H	H	A	A	H	B	H	H	H	A	B	H	A	B	B	H	H	B	B	A	A	H	H	B	H	B	H	A	H	H	A	H	B	A	B	A	H	H	B	H	B	H	B	H	B
	A02	22380149	H	B	H	H	A	A	H	B	H	H	H	A	B	H	A	B	B	H	H	B	B	A	A	H	H	B	H	B	H	A	H	H	A	H	B	A	B	A	H	H	B	H	B	H	B	H	B
	A02	22380162	H	B	H	H	A	A	H	B	H	H	H	A	B	H	A	B	B	H	H	B	B	A	A	H	H	B	H	B	H	A	H	H	A	H	B	A	B	A	H	H	B	H	B	H	B	H	B
	A02	22380165	H	B	H	H	A	A	H	B	H	H	H	A	B	H	A	B	B	H	H	B	B	A	A	H	H	B	H	B	H	A	H	H	A	H	B	A	B	A	H	H	B	H	B	H	B	H	B
	A02	22380168	H	B	H	H	A	A	H	B	H	H	H	A	B	H	A	B	B	H	H	B	B	A	A	H	H	B	H	B	H	A	H	H	A	H	B	A	B	A	H	H	B	H	B	H	B	H	B
	A02	22380171	H	B	H	H	A	A	H	B	H	H	H	A	B	H	A	B	B	H	H	B	B	A	A	H	H	B	H	B	H	A	H	H	A	H	B	A	B	A	H	H	B	H	B	H	B	H	B
	A02	22796247	H	B	H	H	A	A	H	B	H	H	H	A	B	H	A	B	B	H	H	B	B	A	A	H	H	B	H	B	H	A	H	H	A	H	B	A	B	A	H	H	B	H	B	H	B	H	B
	A02	23252301	H	B	A	A	H	A	H	B	H	H	H	H	B	H	H	H	H	A	H	B	A	A	A	H	H	H	A	B	H	A	H	A	A	H	B	A	H	A	A	A	B	H	B	H	B	H	B
	A02	23253052	H	B	A	A	H	A	H	B	H	H	H	H	B	H	H	H	H	A	H	B	H	H	A	H	H	H	A	B	H	A	H	H	A	H	B	A	H	A	A	A	B	H	B	H	B	H	B
	A02	23253055	H	B	A	A	H	A	H	B	H	H	H	H	B	H	H	H	H	A	H	B	H	H	A	H	H	H	A	B	H	A	H	H	A	H	B	A	H	A	A	A	B	H	B	H	B	H	B
	A02	23253549	H	B	A	A	H	A	H	B	H	H	H	H	B	H	H	H	H	A	H	B	H	H	A	H	H	H	A	B	H	A	H	H	A	H	B	A	H	A	A	A	B	H	B	H	B	H	B
	A02	23557884	H	B	H	H	A	A	B	B	H	H	H	A	B	H	A	H	B	H	H	B	H	A	A	H	H	B	H	B	H	A	H	H	A	H	B	A	B	A	H	H	B	H	B	H	H	H	B
	A02	23727479	H	B	H	H	A	A	B	B	H	H	H	A	B	H	A	B	B	H	H	B	H	A	A	H	H	B	H	B	H	A	H	H	A	H	B	A	B	A	H	H	B	H	B	H	H	H	B
	A02	23727510	H	B	H	H	A	A	B	B	H	H	H	A	B	H	A	B	B	H	H	B	B	A	A	H	H	B	H	B	H	A	H	H	A	H	B	A	B	A	H	H	B	H	B	H	H	H	B
	A02	23852754	H	B	H	H	A	A	B	B	H	H	H	A	B	H	A	B	B	H	H	B	B	A	A	H	H	B	H	B	H	A	H	B	A	H	B	A	B	A	H	H	B	H	B	H	H	H	B
	A02	23876080	H	B	H	H	A	A	H	B	H	H	H	A	B	H	A	B	B	H	H	B	B	A	A	H	H	B	H	B	H	A	H	H	A	B	B	A	B	A	H	H	B	B	B	H	H	H	B
	A02	23876123	H	B	H	H	A	A	H	B	H	H	H	A	B	H	A	B	B	H	H	B	B	A	A	H	H	B	H	B	H	A	H	H	A	B	B	A	B	A	H	H	B	H	B	H	H	H	B
	A02	23878150	H	B	H	H	A	A	B	B	H	H	H	A	B	H	A	B	B	H	H	B	B	A	A	H	H	B	H	B	H	A	H	H	A	H	B	A	B	A	H	A	B	H	B	H	H	H	B
	A02	23878179	H	B	H	H	A	A	B	B	H	H	H	A	B	H	A	B	B	H	H	B	B	A	A	H	H	B	H	B	H	A	H	H	A	H	B	A	B	A	H	A	B	H	B	H	H	H	B
	A02	23878225	H	B	H	H	A	A	B	B	H	H	H	A	B	H	A	B	B	H	H	B	B	A	A	H	H	B	H	B	H	A	H	H	A	H	B	A	B	A	H	A	B	H	B	H	H	H	B
	A02	23878246	H	B	H	H	A	A	B	B	H	H	H	A	B	H	A	B	B	H	H	B	B	A	A	H	H	B	H	B	H	A	H	H	A	H	B	A	B	A	H	A	B	H	B	H	H	H	B
	A02	23878249	H	B	H	H	A	A	B	B	H	H	H	A	B	H	A	B	B	H	H	B	B	A	A	H	H	B	H	B	H	A	H	H	A	H	B	A	B	A	H	A	B	H	B	H	H	H	B
	A02	23901686	H	B	H	H	A	A	B	B	H	H	H	A	B	H	H	B	B	H	H	B	B	H	A	H	H	B	H	B	H	H	H	H	A	H	B	A	H	A	H	A	B	H	B	H	H	H	B
	A02	23973538	H	B	H	H	A	A	B	B	H	H	H	A	B	H	A	B	B	H	H	B	B	A	A	H	H	B	H	B	H	A	H	H	A	H	B	A	H	A	H	A	B	H	B	H	H	H	B
	A02	23973562	H	B	H	H	A	A	B	B	H	H	H	A	B	H	A	B	B	H	H	B	B	A	A	H	H	B	H	B	H	A	H	H	A	H	B	A	H	A	H	A	B	H	B	H	H	H	B
	A02	23973581	H	B	H	H	A	A	B	B	H	H	H	A	B	H	A	B	B	H	H	B	B	A	A	H	H	B	H	B	H	A	H	H	A	H	B	A	H	A	H	A	B	H	B	H	H	H	B
	A02	23973659	H	B	H	H	A	A	B	B	H	H	H	A	B	H	A	B	B	H	H	B	B	A	A	H	H	B	H	B	H	A	H	H	A	H	B	A	H	A	H	A	B	H	B	H	H	H	B
	A02	23973667	H	B	H	H	A	A	B	B	H	H	H	A	B	H	A	B	B	H	H	B	B	A	A	H	H	B	H	B	H	A	H	H	A	H	B	A	H	A	H	A	B	H	B	H	H	H	B
	A02	23973684	H	B	H	H	A	A	B	B	H	H	H	A	B	H	A	B	B	H	H	B	B	A	A	H	H	B	H	B	H	A	H	H	A	H	B	A	H	A	H	A	B	H	B	H	H	H	B
	A02	24027288	H	B	H	H	A	A	B	B	H	H	H	A	B	H	A	B	B	H	H	B	B	A	A	H	H	B	H	B	H	A	H	H	A	H	B	A	H	A	H	A	B	H	B	H	H	H	B
	A02	24027347	H	B	H	H	A	A	B	B	H	H	H	A	B	H	A	B	B	H	H	B	B	A	A	H	H	B	H	B	H	A	H	H	A	H	B	A	H	A	H	A	B	H	B	H	H	H	B
	A02	24027355	H	B	H	H	A	A	B	B	H	H	H	A	B	H	A	B	B	H	H	B	B	A	A	H	H	B	H	B	H	A	H	H	A	H	B	A	H	A	H	A	B	H	B	H	H	H	B
	A02	24027427	H	B	H	H	A	A	B	B	H	H	H	A	B	H	A	B	B	H	H	B	B	A	A	H	H	B	H	B	H	A	H	H	A	H	B	A	H	A	H	A	B	H	B	H	H	H	B
	A02	24027460	H	B	H	H	A	A	B	B	H	H	H	A	B	H	A	B	B	H	H	B	B	A	A	H	H	B	H	B	H	A	H	H	A	H	B	A	H	A	H	A	B	H	B	H	H	H	B
	A02	24044800	H	B	H	A	A	A	B	B	H	H	B	A	B	H	A	H	B	H	H	B	B	A	A	H	H	B	H	B	H	A	H	H	A	H	B	A	H	A	H	H	B	H	B	A	H	H	B
	A02	24044838	H	B	H	A	A	A	B	B	H	H	B	A	B	H	A	B	B	H	H	B	B	A	A	H	H	B	H	B	H	A	H	H	A	H	B	A	H	A	H	H	B	H	B	A	H	H	B
	A02	24173614	H	B	H	H	A	A	B	B	H	H	H	A	B	H	A	H	B	H	H	B	B	A	A	H	H	B	H	B	H	A	H	H	A	H	B	A	H	A	H	A	B	H	B	H	H	H	B
	A02	24173623	H	B	H	H	H	A	B	B	H	H	H	A	B	H	A	H	B	H	H	B	B	A	A	H	H	B	H	B	H	A	H	H	A	H	B	A	H	A	H	A	B	H	B	H	H	H	B
	A02	24173626	H	B	H	H	H	A	B	B	H	H	H	A	B	H	A	H	B	H	H	B	B	A	A	H	H	B	H	B	H	A	H	H	A	H	B	A	H	A	H	A	B	H	B	H	H	H	B
	A02	24173653	H	B	H	H	A	A	B	B	H	H	H	A	B	H	A	H	B	H	H	B	B	A	A	H	H	B	H	B	H	A	H	H	A	H	B	A	H	A	H	A	B	H	B	H	H	H	B
	A02	24173986	H	B	H	H	H	A	B	B	H	H	H	A	B	H	A	H	B	H	H	B	B	A	A	H	H	B	H	B	H	A	H	H	A	H	B	A	H	A	H	A	B	H	B	H	H	H	B
	A02	24173992	H	B	H	H	H	A	B	B	H	H	H	A	B	H	A	H	B	H	H	B	B	A	A	H	H	B	H	B	H	A	H	H	A	H	B	A	H	A	H	A	B	H	B	H	H	H	B
	A02	24555417	H	B	H	B	A	A	B	B	H	B	H	A	B	H	A	B	B	H	H	B	B	A	A	H	H	B	H	H	H	A	H	H	A	H	B	A	H	A	H	A	B	H	H	H	H	H	B
	A02	24555429	H	B	H	B	A	A	B	B	H	B	H	A	B	H	A	B	B	H	H	B	B	A	A	H	H	B	H	H	H	A	H	H	A	H	B	A	H	A	H	A	B	H	H	H	H	H	B
	A02	24555505	H	B	H	B	A	A	B	B	H	B	H	A	B	H	A	B	B	H	H	B	B	A	A	H	H	B	H	H	H	A	H	H	A	H	B	A	H	A	H	A	B	H	H	H	H	H	B
	A02	24555511	H	B	H	B	A	A	B	B	H	B	H	A	B	H	A	B	B	H	H	B	B	A	A	H	H	B	H	H	H	A	H	H	A	H	B	A	H	A	H	A	B	H	H	H	H	H	B
	A02	24555522	H	B	H	B	A	A	B	B	H	B	H	A	B	H	A	B	B	H	H	B	B	A	A	H	H	B	H	H	H	A	H	H	A	H	B	A	H	A	H	A	B	H	H	H	H	H	B
	A02	24555544	H	B	H	B	A	A	B	B	H	B	H	A	B	H	A	B	B	H	H	B	B	A	A	H	H	B	H	H	H	A	H	H	A	H	B	A	H	A	H	A	B	H	H	H	H	H	B
	A02	24695852	H	B	H	B	A	A	B	B	H	B	H	A	B	H	A	B	B	H	H	B	B	A	A	H	H	B	H	H	H	A	H	H	A	H	B	A	H	A	H	A	B	H	H	H	H	H	B
	A02	24695861	H	B	H	B	A	A	B	B	H	B	H	A	B	H	A	B	B	H	H	B	B	A	A	H	H	B	H	H	H	A	H	H	A	H	B	A	H	A	H	A	B	H	H	H	H	H	B
	A02	24695866	H	B	H	B	A	A	B	B	H	B	H	A	B	H	A	B	B	H	H	B	B	A	A	H	H	B	H	H	H	A	H	H	A	H	B	A	H	A	H	A	B	H	H	H	H	H	B
	A02	24695875	H	B	H	B	A	A	B	B	H	B	H	A	B	H	A	B	B	H	H	B	B	A	A	H	H	B	H	H	H	A	H	H	A	H	B	A	H	A	H	A	B	H	H	H	H	H	B
	A02	24695889	H	B	H	B	A	A	B	B	H	B	H	A	B	H	A	B	B	H	H	B	B	A	A	H	H	B	H	H	H	A	H	H	A	H	B	A	H	A	H	A	B	H	H	H	H	H	B
	A02	24696171	H	B	H	B	A	A	B	B	H	B	H	A	B	H	A	B	B	H	H	B	B	A	A	H	H	B	H	H	H	A	H	H	A	H	B	A	H	A	H	A	B	H	H	H	H	H	B
	A02	24696199	H	B	H	B	A	A	B	B	H	B	H	A	B	H	A	B	B	H	H	B	B	A	A	H	H	B	H	H	B	A	H	H	A	H	B	A	H	A	H	A	B	H	H	H	H	H	B
	A02	24696205	H	B	H	B	A	A	B	B	H	B	H	A	B	H	A	B	B	H	H	B	B	A	A	H	H	B	H	H	B	A	H	H	A	H	B	A	H	A	H	A	B	H	H	H	H	H	B
	A02	24754571	H	B	H	B	A	A	B	B	H	B	H	A	B	H	A	B	B	H	H	B	B	A	A	H	H	B	H	H	H	A	H	H	A	H	B	A	H	A	H	A	B	H	H	H	H	H	B
	A02	24754659	H	B	H	B	A	A	B	B	H	B	H	A	B	H	A	B	B	H	H	B	B	A	A	H	H	B	H	H	H	A	H	H	A	H	B	A	H	A	H	A	B	H	H	H	H	H	B
	A02	24867157	H	B	H	B	A	A	B	B	H	B	H	A	B	H	A	B	B	H	H	B	H	A	A	H	H	B	H	H	H	A	H	H	A	H	B	A	H	A	H	A	B	H	H	H	H	H	B
	A02	24867158	H	B	H	B	A	A	B	B	H	B	H	A	B	H	A	B	B	H	H	B	H	A	A	H	H	B	H	H	H	A	H	H	A	H	B	A	H	A	H	A	B	H	H	H	H	H	B
	A02	24867159	H	B	H	B	A	A	B	B	H	B	H	A	B	H	A	B	B	H	H	B	H	A	A	H	H	B	H	H	H	A	H	H	A	H	B	A	H	A	H	A	B	H	H	H	H	H	B
	A02	24890169	H	B	H	B	A	A	B	B	H	B	H	A	B	H	A	B	B	H	H	B	B	A	A	H	H	B	H	H	H	A	H	H	A	H	B	A	H	A	H	A	B	H	H	H	H	H	B
	A02	24890330	H	B	H	B	A	A	B	B	H	B	H	A	B	H	A	B	B	H	H	B	B	A	A	H	H	B	H	H	H	A	H	H	A	H	B	A	H	A	H	A	B	H	H	H	H	H	B
	A02	25188295	H	B	H	B	H	A	B	B	H	B	H	A	B	H	A	B	B	H	H	B	H	A	A	A	H	B	H	A	H	A	H	A	A	H	B	A	H	A	H	A	B	H	H	H	H	H	B
	A02	25198463	H	B	H	B	H	A	B	B	H	B	H	A	B	H	A	B	B	H	H	B	H	A	A	H	H	B	H	A	H	A	H	H	A	H	B	A	H	A	H	A	B	H	H	H	H	H	B
	A02	25326505	H	B	H	B	H	A	B	B	H	B	H	A	B	H	A	B	B	H	H	B	B	A	A	H	H	B	H	A	H	A	H	H	A	H	B	A	H	A	H	A	B	H	H	H	H	H	H
	A02	25333478	H	B	H	B	H	A	B	B	H	B	H	A	B	H	A	B	B	H	H	B	B	A	A	H	H	B	H	A	H	A	H	H	A	H	B	A	H	A	H	A	B	H	H	H	H	H	B
	A02	25333522	H	B	H	B	H	A	B	B	H	B	H	A	B	H	A	B	B	H	H	B	B	A	A	H	H	B	H	A	H	A	H	H	A	H	B	A	H	A	H	A	B	H	H	H	H	H	B
	A02	25333600	H	B	H	B	H	A	B	B	H	B	H	A	B	H	A	B	B	H	H	B	B	A	A	H	H	B	H	A	H	A	H	H	A	H	B	A	H	A	H	A	B	H	H	H	H	H	B
	A02	25333643	H	B	H	B	H	A	B	B	H	B	H	A	B	H	A	B	B	H	H	B	B	A	A	H	H	B	H	A	H	A	H	H	A	H	B	A	H	A	H	A	B	H	H	H	H	H	B
	A02	25333652	H	B	H	B	H	A	B	B	H	B	H	A	B	H	A	B	B	H	H	B	B	A	A	H	H	B	H	A	H	A	H	H	A	H	B	A	H	A	H	A	B	H	H	H	H	H	B
	A02	25333657	H	B	H	B	H	A	B	B	H	B	H	A	B	H	A	B	B	H	H	B	B	A	A	H	H	B	H	A	H	A	H	H	A	H	B	A	H	A	H	A	B	H	H	H	H	H	B
	A02	25333674	H	B	H	B	H	A	B	B	H	B	H	A	B	H	A	B	B	H	H	B	B	A	A	H	H	B	H	A	H	A	H	H	A	H	B	A	H	A	H	A	B	H	H	H	H	H	B
	A02	25333675	H	B	H	B	H	A	B	B	H	B	H	A	B	H	A	B	B	H	H	B	B	A	A	H	H	B	H	A	H	A	H	H	A	H	B	A	H	A	H	A	B	H	H	H	H	H	B
	A02	25505846	B	B	H	H	A	A	H	H	H	H	A	H	H	H	H	H	H	B	H	H	H	H	H	H	A	H	A	H	H	A	B	A	A	H	H	A	H	A	H	H	H	H	H	H	B	B	A
	A02	25505882	B	B	H	H	A	A	H	H	H	H	A	H	H	H	H	H	H	B	H	H	H	H	H	H	A	H	A	H	H	A	B	H	A	H	H	A	H	A	H	H	H	H	H	H	B	B	H
	A02	26027654	H	B	H	B	H	A	B	B	H	B	H	A	B	H	H	B	B	H	H	B	B	A	A	H	H	B	H	A	H	A	H	H	A	H	B	A	H	A	H	A	B	H	H	H	H	H	B
	A02	26028165	H	B	H	B	H	A	B	B	H	B	H	A	B	H	A	B	B	H	H	B	B	A	A	H	H	B	H	A	H	A	H	H	A	H	B	A	H	A	H	A	B	H	H	H	H	H	B
	A02	26176527	H	B	H	B	H	H	B	B	H	B	H	A	B	H	A	B	B	H	H	B	B	A	A	H	H	B	H	A	H	A	H	H	A	H	B	A	H	A	H	A	B	H	H	H	H	H	B
	A02	26176531	H	B	H	B	H	H	B	B	H	B	H	A	B	H	A	B	B	H	H	B	B	A	A	H	H	B	H	A	H	A	H	H	A	H	B	A	H	A	H	A	B	H	H	H	H	H	B
	A02	26176535	H	B	H	B	H	H	B	B	H	B	H	A	B	H	A	B	B	H	H	B	B	A	A	H	H	B	H	A	H	A	H	H	A	H	B	A	H	A	H	A	B	H	H	H	H	H	B
	A02	26176537	H	B	H	B	H	H	B	B	H	B	H	A	B	H	A	B	B	H	H	B	B	A	A	H	H	B	H	A	H	A	H	H	A	H	B	A	H	A	H	A	B	H	H	H	H	H	B
	A02	26200683	H	B	H	B	H	H	B	B	H	B	H	A	B	H	A	B	B	H	H	B	B	A	A	H	H	B	H	A	H	A	H	H	A	H	B	A	H	A	H	A	B	H	H	H	H	H	B
	A02	26451017	H	B	H	B	H	A	H	B	H	B	H	H	B	H	A	B	B	A	H	H	B	H	H	H	H	B	B	H	A	A	H	H	H	A	H	A	H	H	H	A	H	H	H	H	H	H	B
	A02	27022965	H	B	H	B	H	H	B	B	H	B	H	A	B	H	H	B	B	H	H	B	B	A	A	H	H	B	B	A	H	A	H	H	A	H	B	A	H	A	H	A	H	H	A	H	H	H	B
	A02	27024883	H	B	H	B	H	H	B	B	H	B	H	A	B	H	H	B	B	H	H	B	B	A	A	H	H	B	B	A	H	A	H	H	A	H	B	A	H	A	H	A	H	H	A	H	H	H	B
	A02	27024890	H	B	H	B	H	H	B	B	H	B	H	A	B	H	H	B	B	H	H	B	B	A	A	H	H	B	B	A	H	A	H	H	A	H	B	A	H	A	H	A	H	H	A	H	H	H	B
	A02	27168168	H	B	H	B	H	H	B	B	H	B	H	A	B	H	H	B	B	H	H	B	B	A	A	H	H	B	B	A	H	A	H	H	A	H	B	A	H	A	H	A	H	H	A	H	H	H	B
	A02	27168176	H	B	H	B	H	H	B	B	H	B	H	A	B	H	H	B	B	H	H	B	B	A	A	H	H	B	B	A	H	A	H	H	A	H	B	A	H	A	H	A	H	H	A	H	H	H	B
	A02	27168557	H	B	H	B	H	H	B	B	H	B	H	A	B	H	H	B	B	H	H	B	B	A	A	H	H	B	B	A	H	A	H	H	A	H	B	A	H	A	H	A	H	H	A	H	H	H	B
	A02	27222363	H	B	H	B	H	H	B	B	H	B	H	A	B	H	H	B	B	H	H	B	H	A	A	H	H	B	B	A	H	A	H	H	A	H	B	A	H	A	H	A	H	H	A	H	H	H	B
	A02	27222381	H	B	H	B	H	H	B	B	H	B	H	A	B	H	H	B	B	H	H	B	H	A	A	H	H	B	B	A	H	A	H	H	A	H	B	A	H	A	H	A	H	H	A	H	H	H	B
	A02	27222392	H	B	H	B	H	H	B	B	H	B	H	A	B	H	H	B	B	H	H	B	H	A	A	H	H	B	B	A	H	A	H	H	A	H	B	A	H	A	H	A	H	H	A	H	H	H	B
	A02	27222397	H	B	H	B	H	H	B	B	H	B	H	A	B	H	H	B	B	H	H	B	H	A	A	H	H	B	B	A	H	A	H	H	A	H	B	A	H	A	H	A	H	H	A	H	H	H	B
	A02	27222414	H	B	H	B	H	H	B	B	H	B	H	A	B	H	H	B	B	H	H	B	H	A	A	H	H	B	B	A	H	A	H	H	A	H	B	A	H	A	H	A	H	H	A	H	H	H	B
	A02	27222743	H	B	H	B	H	H	B	B	H	B	H	A	B	H	H	B	B	H	H	B	H	A	A	H	H	B	B	A	H	A	H	H	A	H	B	A	H	A	H	A	H	H	A	H	H	H	B
	A02	27222778	H	B	H	B	H	H	B	B	H	B	H	A	B	H	H	B	B	H	H	B	H	A	A	H	H	B	B	A	H	A	H	H	A	H	B	A	H	A	H	A	H	H	A	H	H	H	B
	A02	27273521	H	B	H	B	H	H	B	B	H	B	H	A	B	H	H	B	B	H	H	B	H	A	A	H	A	B	B	A	H	A	H	H	A	H	B	A	H	A	H	A	H	H	A	H	H	H	B
	A02	27374920	H	B	H	B	H	H	B	B	H	B	H	A	B	H	H	B	B	H	H	B	H	A	A	H	A	B	B	A	H	A	H	H	A	H	B	A	H	A	H	A	H	H	A	H	H	H	B
	A02	27375168	H	B	H	B	H	H	B	B	H	B	H	A	B	H	H	B	B	H	H	B	H	A	A	H	A	B	B	A	H	A	H	H	A	H	B	A	H	A	H	A	H	H	A	H	H	H	B
	A02	27727945	H	B	H	B	H	H	B	B	H	B	H	A	B	H	H	B	B	H	H	B	H	A	A	H	A	B	B	A	H	A	H	H	A	H	B	A	H	A	H	A	H	H	A	H	H	H	B
	A03	19896	A	A	A	B	H	A	A	A	H	H	H	A	H	H	H	H	B	H	A	H	B	H	H	B	H	H	H	A	B	A	H	H	B	A	B	H	H	H	A	B	H	H	B	H	H	B	H
	A03	26171	A	A	A	B	H	A	A	A	H	H	H	A	H	H	H	H	B	H	A	H	B	H	H	B	H	H	H	A	B	A	H	H	B	A	B	H	H	H	A	B	H	H	B	H	H	B	H
	A03	32784	A	A	A	B	H	A	A	A	H	H	H	A	H	H	H	H	B	H	A	H	B	H	H	B	H	H	H	A	B	A	H	H	B	A	B	H	H	H	A	B	H	H	B	H	H	B	H
	A03	40340	A	A	A	B	H	A	A	A	H	H	H	A	H	H	H	H	B	H	A	H	B	H	H	B	H	H	H	A	B	A	H	H	B	A	B	H	H	H	A	B	H	H	B	H	H	B	H
	A03	139421	A	A	A	B	H	A	A	A	H	H	H	A	H	H	H	H	B	H	A	H	B	H	H	B	H	H	H	A	B	A	H	H	B	A	B	H	H	H	A	B	H	H	B	H	H	B	H
	A03	148997	A	A	A	B	H	A	A	A	H	H	H	A	H	H	H	H	B	H	A	H	B	H	H	B	H	H	H	A	B	A	H	H	B	A	B	H	H	H	A	B	H	H	B	H	H	B	H
	A03	149168	A	A	A	B	H	A	A	A	H	H	H	A	H	H	H	H	B	H	A	H	B	H	H	B	H	H	H	A	B	A	H	H	B	A	B	H	H	H	A	B	H	H	B	H	H	B	H
	A03	536025	A	A	A	B	H	A	A	A	H	H	H	A	H	H	H	H	B	H	A	H	B	H	H	B	H	H	H	A	B	A	H	H	B	A	B	H	H	H	A	B	H	H	B	H	H	B	H
	A03	603710	A	A	A	B	H	A	A	A	H	A	H	A	H	H	H	H	B	H	A	H	B	H	H	B	H	H	H	A	B	A	H	H	B	A	B	H	H	H	A	H	H	H	B	H	H	B	H
	A03	850079	A	A	A	B	H	A	A	A	H	H	H	A	H	H	H	H	B	H	A	H	B	H	H	B	H	H	H	A	B	A	H	H	B	A	B	H	H	H	A	B	H	H	B	H	H	B	H
	A03	1019625	A	A	B	B	H	A	A	A	A	H	B	A	H	H	B	H	B	H	A	B	B	H	H	B	H	B	B	H	B	A	H	H	B	A	B	A	A	H	A	B	H	H	B	H	H	B	H
	A03	1019652	A	A	B	B	H	A	A	A	A	H	B	A	H	H	B	H	B	H	A	B	B	H	H	B	H	B	B	H	B	A	H	H	B	A	B	A	A	H	A	B	H	H	B	H	H	B	H
	A03	1019868	A	A	B	B	H	A	A	A	A	H	B	A	H	H	H	H	B	H	A	B	B	H	H	B	H	H	B	H	B	A	H	H	B	A	B	A	A	H	A	B	H	H	B	H	H	B	H
	A03	1019873	A	A	B	B	H	A	A	A	A	H	B	A	H	H	B	H	B	H	A	B	B	H	H	B	H	B	B	H	B	A	H	H	B	A	B	A	A	H	A	B	H	H	B	H	H	B	H
	A03	1097541	A	A	H	B	H	A	A	A	H	H	H	A	H	H	H	H	B	H	A	H	B	H	H	B	H	H	H	H	B	A	H	H	B	A	B	H	H	H	A	B	H	H	B	H	H	B	H
	A03	1097564	A	A	H	B	H	A	A	A	H	H	H	A	H	H	H	H	B	H	A	H	B	H	H	B	H	H	H	H	B	A	H	H	B	A	B	H	H	H	A	B	H	H	B	H	H	B	H
	A03	1375473	A	A	B	B	H	A	A	A	H	H	B	A	H	H	H	H	B	H	A	B	B	B	H	B	B	B	B	B	B	A	B	B	B	H	B	H	B	H	A	B	H	H	B	H	B	B	H
	A03	1375708	A	A	B	B	H	A	A	A	H	H	B	A	B	H	H	H	B	H	A	B	B	B	H	B	B	B	B	B	B	A	B	B	B	A	B	H	B	H	A	B	H	H	B	H	B	B	H
	A03	1446981	A	A	H	B	H	A	A	A	H	H	H	A	H	H	H	H	B	H	A	H	B	H	H	B	H	H	H	H	B	A	H	H	B	A	B	H	B	H	A	B	H	H	B	H	H	B	H
	A03	1447289	A	A	H	B	H	A	A	A	H	H	H	A	H	H	H	H	B	B	A	H	B	H	H	B	H	H	H	H	B	A	H	H	B	A	B	H	B	H	A	B	H	H	B	H	A	B	H
	A03	1519203	A	A	H	B	H	A	A	A	B	H	H	A	H	H	H	H	B	H	A	H	B	H	H	B	H	H	H	H	B	A	H	H	B	A	B	H	B	H	A	B	H	H	B	H	H	B	H
	A03	1579319	A	A	H	B	H	A	A	A	B	H	H	A	H	H	H	H	B	H	A	H	B	H	H	B	H	H	H	H	B	A	H	H	B	A	B	H	B	H	A	B	H	H	B	H	H	B	H
	A03	1660087	A	A	H	B	H	A	A	A	B	H	H	A	H	H	H	H	B	H	A	H	B	H	H	B	H	H	H	H	B	A	H	H	B	A	B	H	B	H	A	B	H	H	B	H	H	B	H
	A03	1721567	A	A	H	B	H	A	A	A	B	H	H	A	H	H	B	B	B	H	A	H	B	B	H	B	H	H	A	H	B	A	H	H	B	A	B	H	B	A	A	B	H	B	B	H	H	B	H
	A03	1721573	A	A	H	B	H	A	A	A	B	H	H	A	H	H	B	B	B	H	A	H	B	B	H	B	H	H	A	H	B	A	H	H	B	A	B	H	B	A	A	B	H	B	B	H	H	B	H
	A03	2130558	A	A	H	H	H	A	A	A	B	H	H	H	H	H	H	H	B	B	A	H	B	H	H	B	H	H	H	H	B	A	H	H	H	A	B	H	B	A	A	B	H	H	B	H	H	B	H
	A03	2130559	A	A	H	H	H	A	A	A	B	H	H	H	H	H	H	H	B	B	A	H	B	H	H	B	H	H	H	H	B	A	H	H	H	A	B	H	B	A	A	B	H	H	B	H	H	B	H
	A03	2130591	A	A	H	H	H	A	A	A	B	H	H	H	H	H	H	H	B	B	A	H	B	H	H	B	H	H	H	H	B	A	H	H	H	A	B	H	B	A	A	B	H	H	B	H	H	B	H
	A03	2286043	A	A	H	H	H	A	H	A	B	H	H	H	H	H	H	H	B	B	A	H	B	H	H	B	H	H	H	H	B	A	H	H	H	A	B	H	B	A	A	B	H	H	B	H	H	B	H
	A03	2516998	A	A	H	H	H	A	H	A	B	H	H	H	H	H	H	H	B	B	A	H	H	H	H	B	H	H	H	H	B	H	H	H	H	A	B	H	B	A	A	H	H	H	B	H	H	B	H
	A03	2517014	A	A	H	H	H	A	H	A	B	H	H	H	H	H	H	H	B	B	A	H	H	H	H	B	H	H	H	H	B	H	H	H	H	A	B	H	B	A	A	H	H	H	B	H	H	B	H
	A03	2610305	A	A	H	H	H	A	H	A	B	H	H	H	H	H	H	H	B	B	A	H	H	H	H	B	H	H	H	H	B	A	H	H	H	A	B	H	B	A	A	H	H	H	B	H	H	B	H
	A03	2628906	A	A	H	H	H	A	H	H	B	H	H	H	H	H	H	H	B	B	A	H	H	H	H	H	H	H	H	H	B	A	H	H	H	A	B	H	B	A	A	H	H	H	B	H	H	B	H
	A03	2789953	A	A	H	H	H	A	H	A	B	H	H	H	H	H	H	H	B	B	A	H	B	H	H	B	H	H	H	H	B	A	H	H	H	A	B	H	B	A	A	H	H	H	B	H	H	B	H
	A03	2914828	A	A	H	H	H	A	H	A	B	H	H	H	H	H	H	H	B	B	A	H	B	H	H	B	H	H	H	H	B	A	H	H	H	A	B	H	B	A	A	H	H	H	B	H	H	B	H
	A03	3272656	H	A	H	H	H	A	H	A	B	H	H	B	H	H	H	H	B	B	A	H	B	H	H	B	H	H	H	H	B	A	H	H	H	A	B	H	B	A	A	H	H	H	B	H	B	B	H
	A03	3273483	H	A	H	H	H	A	H	A	B	H	H	B	H	H	H	H	B	B	A	H	B	H	H	B	H	H	H	H	B	A	H	H	H	A	B	H	B	A	A	H	H	H	B	H	B	B	H
	A03	3704937	H	A	H	H	H	A	H	A	B	H	H	B	H	H	H	H	B	B	A	H	B	H	H	H	H	H	H	H	B	A	H	H	H	A	B	H	B	A	A	H	H	H	B	H	B	B	H
	A03	3704943	H	A	H	H	H	A	H	A	B	H	H	B	H	H	H	H	B	B	A	H	B	H	H	H	H	H	H	H	B	A	H	H	H	A	B	H	B	A	A	H	H	H	B	H	B	B	H
	A03	3811559	H	A	H	H	H	A	H	A	B	H	H	B	H	H	H	H	B	B	A	H	B	H	H	H	H	H	H	H	B	A	H	H	H	A	B	H	B	A	A	H	H	H	B	H	B	B	H
	A03	3991687	H	A	H	H	H	A	H	A	B	H	H	B	H	H	H	H	B	B	A	H	B	H	H	H	H	H	H	H	B	A	H	H	H	A	B	H	B	A	A	H	H	H	B	H	B	B	H
	A03	3991708	H	A	H	H	H	A	H	A	B	H	H	B	H	H	H	H	B	B	A	H	B	H	H	H	H	H	H	H	B	A	H	H	H	A	B	H	B	A	A	H	H	H	B	H	B	B	H
	A03	4127388	H	A	H	H	H	A	H	A	B	H	H	B	H	H	H	H	B	B	A	H	B	H	H	H	H	H	H	H	B	A	H	H	H	A	B	H	B	A	A	H	H	H	B	H	B	B	H
	A03	4127403	H	A	H	H	H	A	H	A	B	H	H	B	H	H	H	H	B	B	A	H	B	H	H	H	H	H	H	H	B	A	H	H	H	A	B	H	B	A	A	H	H	H	B	H	B	B	H
	A03	4242304	H	A	H	H	H	A	H	A	B	H	H	B	H	A	H	H	B	B	A	H	B	H	H	H	H	H	H	H	B	A	H	H	H	A	B	H	B	A	A	H	H	H	B	H	B	B	H
	A03	4279499	H	A	H	H	H	A	H	A	B	H	H	B	B	A	H	H	B	B	A	H	B	H	H	H	H	H	H	H	B	A	H	H	H	A	B	H	B	A	A	H	H	H	B	H	B	B	H
	A03	4279540	H	A	H	H	H	A	H	A	B	H	H	B	B	A	H	H	B	B	A	H	B	H	H	H	H	H	H	H	B	A	H	H	H	A	B	H	B	A	A	H	H	H	B	H	B	B	H
	A03	4279543	H	A	H	H	H	A	H	A	B	H	H	B	B	A	H	H	B	B	A	H	B	H	H	H	H	H	H	H	B	A	H	H	H	A	B	H	B	A	A	H	H	H	B	H	B	B	H
	A03	4285836	H	A	H	H	H	A	H	A	B	H	H	B	B	A	H	H	B	B	A	H	B	H	H	H	H	H	H	H	B	A	H	H	H	A	B	H	B	A	A	H	H	H	B	H	B	B	H
	A03	4285843	H	A	H	H	H	A	H	A	B	H	H	B	B	A	H	H	B	B	A	H	B	H	H	H	H	H	H	H	B	A	H	H	H	A	B	H	B	A	A	H	H	H	B	H	B	B	H
	A03	4666898	H	A	H	H	H	A	H	A	B	H	H	B	B	A	H	H	B	B	A	H	B	H	H	H	A	H	H	H	B	A	H	H	H	A	B	H	B	A	A	H	H	B	B	H	B	B	H
	A03	4666961	H	A	H	H	H	A	H	A	B	H	H	B	B	A	H	H	B	B	A	H	B	H	H	H	A	H	H	H	B	A	H	H	H	A	B	H	B	A	A	H	H	B	B	H	B	B	H
	A03	4666965	H	A	H	H	H	A	H	A	B	H	H	B	B	A	H	H	B	B	A	H	B	H	H	H	A	H	H	H	B	A	H	H	H	A	B	H	B	A	A	H	H	B	B	H	B	B	H
	A03	4666972	H	A	H	H	H	A	H	A	B	H	H	B	B	A	H	H	B	B	A	H	B	H	H	H	A	H	H	H	B	A	H	H	H	A	B	H	B	A	A	H	H	B	B	H	B	B	H
	A03	4666980	H	A	H	H	H	A	H	A	B	H	H	B	B	A	H	H	B	B	A	H	B	H	H	H	A	H	H	H	B	A	H	H	H	A	B	H	B	A	A	H	H	H	B	H	B	B	H
	A03	4667027	H	A	H	H	H	A	H	A	B	H	H	B	B	A	H	H	B	B	A	H	B	H	H	H	A	H	H	H	B	A	H	H	H	A	B	H	B	A	A	H	H	H	B	H	B	B	H
	A03	4965780	H	A	H	H	H	A	H	A	B	H	H	B	B	A	H	H	B	B	A	H	H	H	H	H	A	H	H	H	B	A	H	H	H	H	B	H	B	A	A	H	H	H	B	H	B	B	H
	A03	4965788	H	A	H	H	H	A	H	A	B	H	H	B	B	A	H	H	B	B	A	H	H	H	H	H	A	H	H	H	B	A	H	H	H	H	B	H	B	A	A	H	H	H	B	H	B	B	H
	A03	4965802	H	A	H	H	H	A	H	A	B	H	H	B	B	A	H	H	B	B	A	H	H	H	H	H	A	H	H	H	B	A	H	H	H	H	B	H	B	A	A	H	H	H	B	H	B	B	H
	A03	4965817	H	A	H	H	H	A	H	A	B	H	H	B	B	A	H	H	B	B	A	H	H	H	H	H	A	H	H	H	B	A	H	H	H	H	B	H	B	A	A	H	H	H	B	H	B	B	H
	A03	5249276	H	H	H	H	H	A	H	A	B	H	H	B	B	A	H	H	H	B	A	H	H	H	H	H	A	H	B	H	B	A	H	H	H	H	B	H	B	A	A	H	H	H	B	H	B	B	H
	A03	5532799	H	H	H	H	H	A	H	A	B	H	H	B	B	A	B	H	H	B	A	H	H	H	H	H	A	H	B	H	B	A	H	B	H	H	B	H	B	H	H	H	H	H	B	H	B	B	H
	A03	5539639	H	H	H	H	H	A	H	A	B	H	H	B	B	A	H	H	H	B	A	H	H	H	H	H	A	H	B	H	B	A	H	H	H	H	B	H	B	A	A	H	H	H	B	H	B	B	H
	A03	5539642	H	H	H	H	H	A	H	A	B	H	H	B	B	A	H	H	H	B	A	H	H	H	H	H	A	H	B	H	B	A	H	H	H	H	B	H	B	A	A	H	H	H	B	H	B	B	H
	A03	5539645	H	H	H	H	H	A	H	A	B	H	H	B	B	A	H	H	H	B	A	H	H	H	H	H	A	H	B	H	B	A	H	H	H	H	B	H	B	A	A	H	H	H	B	H	B	B	H
	A03	5734290	H	H	H	H	H	A	H	A	B	H	H	B	B	A	H	H	H	B	A	H	H	H	H	H	A	H	B	H	B	A	H	A	H	H	B	H	B	A	A	H	H	H	B	B	B	B	H
	A03	5734323	H	H	H	H	H	A	H	A	B	H	H	B	B	A	H	H	H	B	A	H	H	H	H	H	A	H	B	H	B	A	H	A	H	H	B	H	B	A	A	H	H	H	B	B	B	B	H
	A03	5734344	H	H	H	H	H	A	H	A	B	H	H	B	B	A	H	H	H	B	A	H	H	H	H	H	A	H	B	H	B	A	H	A	H	H	B	H	B	A	A	H	H	H	B	B	B	B	H
	A03	5734348	H	H	H	H	H	A	H	A	B	H	H	B	B	A	H	H	H	B	A	H	H	H	H	H	A	H	B	H	B	A	H	A	H	H	B	H	B	A	A	H	H	H	B	B	B	B	H
	A03	5734521	H	H	A	A	A	A	H	A	B	A	A	B	B	A	H	H	H	B	A	A	H	H	H	A	A	H	B	A	B	A	H	A	A	H	B	H	B	A	A	H	A	H	B	B	B	B	H
	A03	5734542	H	H	H	A	A	A	H	A	B	A	A	B	B	A	H	H	H	B	A	A	H	H	H	A	A	H	B	H	B	A	H	A	A	H	B	H	B	A	A	H	A	H	B	B	B	B	H
	A03	5934637	H	H	H	H	H	A	B	A	B	H	H	B	B	A	H	H	B	B	A	H	H	H	H	H	A	H	B	H	B	A	H	A	H	H	H	H	B	A	A	H	H	H	B	B	B	B	H
	A03	5934682	H	H	H	H	H	A	B	A	B	H	H	B	B	A	H	H	B	B	A	H	H	H	H	H	A	H	B	H	B	A	H	A	H	H	H	H	B	A	A	H	H	H	B	B	B	B	H
	A03	5935032	H	H	H	H	H	A	H	A	B	H	H	B	B	A	H	H	H	B	A	H	H	H	H	H	A	H	B	H	B	A	H	A	H	H	H	H	B	A	A	H	H	H	B	B	B	B	H
	A03	6286263	B	H	H	H	H	A	H	A	B	H	H	B	B	A	H	H	H	B	A	H	H	H	H	H	A	H	B	H	B	A	H	A	H	H	H	H	B	A	A	H	H	H	B	B	B	B	H
	A03	6286378	B	H	H	H	H	A	H	A	B	H	H	B	B	A	H	H	H	B	A	H	H	H	H	H	A	H	B	H	B	A	H	A	H	H	H	H	B	A	A	H	H	H	B	B	B	B	H
	A03	6550664	B	H	H	H	H	A	H	A	B	H	H	B	B	A	H	H	H	B	A	H	H	H	H	H	A	H	B	H	B	A	A	A	H	H	H	H	B	A	A	H	H	H	B	B	B	B	H
	A03	6551426	B	H	H	H	H	A	H	A	B	H	H	B	B	A	H	H	H	B	A	H	H	H	H	H	A	H	B	H	B	A	H	A	H	H	H	H	B	A	A	H	H	H	B	B	B	B	H
	A03	6970655	B	H	H	H	H	A	H	A	B	H	H	B	B	A	H	H	H	B	A	H	H	H	H	H	A	H	B	H	B	H	H	A	H	H	H	H	B	A	A	H	H	H	B	B	B	B	H
	A03	6970679	B	H	H	H	H	A	H	A	B	H	H	B	B	A	H	H	H	B	A	H	H	H	H	H	A	H	B	H	B	H	H	A	H	H	H	H	B	A	A	H	H	H	B	B	B	B	H
	A03	6970682	B	H	H	H	H	A	H	A	B	H	H	B	B	A	H	H	H	B	A	H	H	H	H	H	A	H	B	H	B	H	H	A	H	H	H	H	B	A	A	H	H	H	B	B	B	B	H
	A03	7174929	B	H	H	H	H	A	H	A	B	H	H	B	B	A	H	H	H	B	A	H	H	H	H	H	A	A	B	H	B	H	H	A	H	H	H	H	B	A	A	H	H	H	B	B	B	B	H
	A03	7240129	B	H	H	H	H	A	H	A	B	H	H	B	B	A	H	H	H	B	A	H	H	H	H	H	A	A	B	H	B	H	H	A	H	H	H	H	B	A	A	H	H	H	B	B	B	B	H
	A03	7240463	B	H	H	H	H	A	H	A	B	H	H	B	B	A	H	H	H	B	A	H	H	H	H	H	A	A	B	H	B	H	H	A	H	H	H	H	B	A	A	H	H	H	B	B	B	B	H
	A03	7334206	B	H	H	H	H	A	H	H	B	H	H	B	B	A	H	H	H	B	A	H	H	H	H	H	A	A	B	H	B	H	H	A	H	H	H	H	B	A	A	H	H	H	B	B	B	B	H
	A03	7396044	B	H	H	H	H	A	H	A	B	H	H	B	B	A	H	H	H	B	A	H	H	H	H	H	A	H	B	H	B	H	H	A	H	H	H	H	B	A	A	H	H	H	B	B	B	B	H
	A03	7428583	B	H	H	H	H	A	H	A	B	H	H	B	B	A	H	H	H	B	A	H	H	H	H	H	A	H	B	H	B	H	H	A	H	H	H	H	B	A	A	H	H	H	B	B	B	B	H
	A03	7428718	B	H	H	H	H	A	H	A	B	H	H	B	B	A	H	H	H	B	A	H	H	H	H	H	A	H	B	H	B	H	H	A	H	H	H	H	B	A	A	H	H	H	B	B	B	B	H
	A03	7508644	B	H	H	H	H	A	H	A	B	H	H	B	B	A	H	H	H	B	A	H	H	H	H	H	A	H	B	H	B	H	H	A	H	H	H	H	B	A	A	H	H	H	B	B	B	B	H
	A03	7599163	B	B	H	H	H	A	H	A	B	H	H	B	B	A	H	H	H	B	A	H	H	H	H	H	A	H	B	H	B	H	H	A	H	H	H	H	B	A	A	H	H	H	B	B	B	B	H
	A03	7599175	B	B	H	H	H	A	H	A	B	H	H	B	B	A	H	H	H	B	A	H	H	H	H	H	A	H	B	H	B	H	H	A	H	H	H	H	B	A	A	H	H	H	B	B	B	B	H
	A03	7632327	B	B	H	H	H	A	H	A	B	H	H	B	B	A	H	H	H	B	A	H	H	H	H	H	A	H	B	A	B	H	H	A	H	H	H	H	B	A	A	H	H	H	B	B	B	B	H
	A03	7632528	B	B	H	H	H	A	H	A	B	H	H	B	B	A	H	H	H	B	A	H	H	H	H	H	A	H	B	A	B	H	H	A	H	H	H	H	B	A	A	H	H	H	B	B	B	B	H
	A03	7633977	B	B	H	H	H	A	H	A	B	H	H	B	B	A	H	H	H	B	A	H	H	H	H	H	A	H	B	H	B	H	H	A	H	H	H	B	B	A	A	H	H	H	B	B	B	B	H
	A03	7634057	B	B	H	H	H	A	H	A	B	H	H	B	B	A	H	H	H	B	A	H	H	H	H	H	A	H	B	H	B	H	H	A	H	H	H	B	B	A	A	H	H	H	B	B	B	B	H
	A03	7684888	B	B	H	H	H	A	H	A	B	H	H	B	B	A	H	H	H	B	A	H	H	H	H	H	A	H	B	H	B	H	H	A	H	H	H	H	B	A	A	H	H	H	B	B	B	B	H
	A03	7685014	B	B	H	H	H	A	H	A	B	H	H	B	B	A	H	H	H	B	A	H	H	H	H	H	A	H	B	H	B	H	H	A	H	H	H	H	B	A	A	H	H	H	B	B	B	B	H
	A03	7685535	B	B	H	H	H	A	H	A	B	H	H	B	B	A	H	H	H	B	A	H	H	H	H	H	A	H	B	H	B	H	H	A	H	H	H	H	B	A	A	H	H	H	B	B	B	B	H
	A03	7685542	B	B	H	H	H	A	H	A	B	H	H	B	B	A	H	H	H	B	A	H	H	H	H	H	A	H	B	H	B	H	H	A	H	H	H	H	B	A	A	H	H	H	B	B	B	B	H
	A03	7685543	B	B	H	H	H	A	H	A	B	H	H	B	B	A	H	H	H	B	A	H	H	H	H	H	A	H	B	H	B	H	H	A	H	H	H	H	B	A	A	H	H	H	B	B	B	B	H
	A03	8397205	B	B	H	H	H	H	H	A	B	H	H	B	B	A	A	H	H	B	A	H	H	H	H	H	A	H	B	H	B	H	B	A	H	H	H	H	B	A	A	H	H	H	B	B	B	B	H
	A03	8397371	B	B	H	H	H	H	H	A	B	H	H	B	B	A	A	H	H	B	A	H	H	H	H	H	A	H	B	H	B	H	B	A	H	H	H	H	B	A	A	H	H	H	B	B	B	B	H
	A03	8403526	B	B	H	H	H	H	H	A	B	H	H	B	B	A	A	H	H	B	A	H	H	H	H	H	A	H	B	H	B	H	B	A	H	H	H	H	B	A	A	H	H	H	B	B	B	B	H
	A03	8403600	B	B	H	H	H	H	H	A	B	H	H	B	B	A	A	H	H	B	A	H	H	H	H	H	A	H	B	H	B	H	B	A	H	H	H	H	B	A	A	H	H	H	B	B	B	B	H
	A03	8686641	B	B	H	H	H	H	H	A	B	H	H	B	B	A	A	H	H	B	A	H	H	H	H	H	A	H	B	H	B	H	B	A	H	B	H	H	B	H	A	H	H	H	B	B	B	B	H
	A03	8686672	B	B	H	H	H	H	H	A	B	H	H	B	B	A	A	H	H	B	H	H	H	H	H	H	A	H	B	H	B	H	B	A	H	H	H	H	B	H	A	H	H	H	B	B	B	B	H
	A03	8686679	B	B	H	H	H	H	H	A	B	H	H	B	B	A	A	H	H	B	H	H	H	H	H	H	A	H	B	H	B	H	B	A	H	H	H	H	B	H	A	H	H	H	B	B	B	B	H
	A03	8834328	B	B	H	H	H	H	H	H	B	H	H	B	B	A	A	H	H	B	A	H	H	H	H	H	A	H	B	H	B	H	B	A	H	A	H	H	B	H	A	H	H	H	B	B	B	B	H
	A03	8842382	B	B	H	H	H	H	H	A	B	H	H	B	B	A	A	H	H	B	A	H	H	H	H	H	A	H	B	H	B	H	B	A	H	H	H	H	B	H	A	H	H	H	B	B	B	B	H
	A03	8891836	B	B	H	H	H	H	H	H	B	H	H	B	B	H	A	H	H	B	A	H	H	H	H	H	A	H	B	H	B	H	B	A	H	H	H	H	B	H	A	H	H	H	B	B	B	B	H
	A03	9119683	B	B	H	H	H	H	H	A	B	H	H	B	B	A	A	H	H	B	A	H	H	H	H	H	A	H	B	H	B	H	B	A	H	H	H	H	B	H	H	H	H	H	B	B	B	B	H
	A03	9119705	B	B	H	H	H	H	H	A	B	H	H	B	B	A	A	H	H	B	A	H	H	H	H	H	A	H	B	H	B	H	B	A	H	H	H	H	B	H	H	H	H	H	B	B	B	B	H
	A03	9145382	B	B	H	H	H	H	H	A	B	H	H	B	B	A	A	H	H	B	A	H	H	H	H	H	A	H	B	H	B	H	B	A	H	H	H	H	B	H	H	H	H	H	B	B	B	B	H
	A03	9145392	B	B	H	H	H	H	H	A	B	H	H	B	B	A	A	H	H	B	A	H	H	H	H	H	A	H	B	H	B	H	B	A	H	H	H	H	B	H	H	H	H	H	B	B	B	B	H
	A03	9145401	B	B	H	H	H	H	H	A	B	H	H	B	B	A	A	H	H	B	A	H	H	H	H	H	A	H	B	H	B	H	B	A	H	H	H	H	B	H	H	H	H	H	B	B	B	B	H
	A03	9145408	B	B	H	H	H	H	H	A	B	H	H	B	B	A	A	H	H	B	A	H	H	H	H	H	A	H	B	H	B	H	B	A	H	H	H	H	B	H	H	H	H	H	B	B	B	B	H
	A03	9152477	B	B	H	H	H	H	H	A	B	H	H	B	B	A	A	H	H	B	A	H	H	H	H	H	A	H	B	H	B	H	B	A	H	H	H	H	B	H	H	H	H	H	B	B	B	B	H
	A03	9152489	B	B	H	H	H	H	H	A	B	H	H	B	B	A	A	H	H	B	A	H	H	H	H	H	A	H	B	H	B	H	B	A	H	H	H	H	B	H	H	H	H	H	B	B	B	B	H
	A03	9152498	B	B	H	H	H	H	H	A	B	H	H	B	B	A	A	H	H	B	A	H	H	H	H	H	A	H	B	H	B	H	B	A	H	H	H	H	B	H	H	H	H	H	B	B	B	B	H
	A03	9186561	B	B	H	H	H	H	H	A	B	H	H	B	B	A	A	H	H	B	A	H	H	H	H	H	A	H	B	H	B	H	B	A	H	H	H	H	B	H	H	H	H	H	B	B	B	B	H
	A03	9270644	B	B	H	H	H	H	H	A	B	H	H	B	B	A	A	H	H	B	A	H	H	H	H	H	A	H	B	H	B	H	B	H	H	H	H	H	B	H	H	H	H	H	B	B	B	B	H
	A03	9333290	B	B	H	H	H	H	H	A	B	H	H	B	B	A	A	H	H	B	A	H	H	H	H	H	A	H	B	H	B	H	B	A	H	H	H	H	B	H	H	H	H	H	B	B	B	B	H
	A03	9333341	B	B	H	H	H	H	H	A	B	H	H	B	B	A	A	H	H	B	A	H	H	H	H	H	A	H	B	A	B	H	H	A	H	H	H	H	B	H	H	H	H	H	B	B	B	B	H
	A03	9333380	B	B	H	H	H	H	H	A	B	H	H	B	B	A	A	H	H	B	A	H	H	H	H	H	A	H	B	A	B	H	H	A	H	H	H	H	B	H	H	H	H	H	B	B	B	B	H
	A03	9333535	B	B	H	H	H	H	H	A	B	H	H	B	B	A	A	H	H	B	A	H	H	H	H	H	A	H	B	A	B	H	H	A	H	H	H	H	B	H	H	H	H	H	B	B	B	B	H
	A03	9471560	B	B	H	H	H	H	B	H	B	H	H	B	B	A	A	H	H	B	A	H	H	H	H	H	A	H	B	H	B	H	B	A	H	H	H	H	B	H	H	H	H	H	B	B	B	B	B
	A03	9471579	B	B	H	H	H	H	B	H	B	H	H	B	B	A	A	H	H	B	A	H	H	H	H	H	A	H	B	H	B	H	B	A	H	H	H	H	B	H	H	H	H	H	B	B	B	B	B
	A03	9471670	B	B	H	H	H	H	B	H	B	H	H	B	B	A	A	H	H	B	A	H	H	H	H	H	A	H	B	H	B	H	B	A	H	H	H	H	B	H	H	H	H	H	B	B	B	B	B
	A03	9919032	B	B	H	H	H	H	B	H	B	H	H	B	B	A	A	H	H	B	A	H	H	H	H	H	A	H	B	H	B	H	H	A	H	H	H	H	B	H	H	H	H	H	B	B	B	B	H
	A03	10067213	B	B	H	H	H	H	B	H	B	H	H	B	B	A	A	H	H	B	A	H	H	H	H	H	A	H	B	H	B	H	B	A	H	H	H	H	B	H	H	H	H	H	B	B	B	B	H
	A03	10067216	B	B	H	H	H	H	B	H	B	H	H	B	B	A	A	H	H	B	A	H	H	H	H	H	A	H	B	H	B	H	B	A	H	H	H	H	B	H	H	H	H	H	B	B	B	B	H
	A03	10067228	B	B	H	H	H	H	B	H	B	H	H	B	B	A	A	H	H	B	A	H	H	H	H	H	A	H	B	H	B	H	B	A	H	H	H	H	B	H	H	H	H	H	B	B	B	B	H
	A03	10067267	B	B	H	H	H	H	B	H	B	H	H	B	B	A	A	H	H	B	A	H	H	H	H	H	A	H	B	H	B	H	B	A	H	H	H	H	B	H	H	H	H	H	B	B	B	B	H
	A03	10078048	B	B	H	H	H	H	B	H	B	H	H	B	B	A	A	H	H	B	A	H	H	H	H	H	A	H	B	H	B	H	B	A	H	H	H	H	B	H	H	H	H	H	B	B	B	B	H
	A03	10082575	B	B	H	H	H	H	B	H	B	H	H	B	B	A	A	H	H	B	A	H	H	H	H	H	A	H	B	H	B	H	B	A	H	H	H	H	B	H	H	H	H	H	B	B	B	B	H
	A03	10256900	B	B	H	H	H	H	B	H	B	H	H	B	B	A	A	H	H	B	A	H	H	H	H	H	A	H	B	H	B	H	B	A	H	H	H	H	B	H	H	H	H	H	B	B	B	B	H
	A03	10256921	B	B	H	H	H	H	B	H	B	H	H	B	B	A	A	H	H	B	A	H	H	H	H	H	A	H	B	H	B	H	B	A	H	H	H	H	B	H	H	H	H	H	B	B	B	B	H
	A03	10256922	B	B	H	H	H	H	B	H	B	H	H	B	B	A	A	H	H	B	A	H	H	H	H	H	A	H	B	H	B	H	B	A	H	H	H	H	B	H	H	H	H	H	B	B	B	B	H
	A03	10274887	B	B	H	H	H	H	B	H	B	H	H	B	B	A	A	H	H	B	A	H	H	H	H	H	A	H	B	H	B	H	B	A	H	H	H	B	B	H	H	H	H	H	B	B	B	B	H
	A03	10609539	B	B	H	H	H	H	B	H	B	H	H	B	B	A	A	H	H	B	A	H	H	H	H	H	H	H	B	H	B	H	H	A	H	H	H	H	H	H	H	H	H	H	B	B	B	B	H
	A03	10707873	B	B	H	H	H	H	B	H	B	H	B	B	B	A	A	H	H	B	A	H	H	H	H	H	H	H	B	H	B	H	B	A	H	H	H	H	B	H	H	H	H	H	B	B	B	B	H
	A03	10739191	B	B	B	B	H	H	B	B	B	H	B	B	B	A	A	H	B	B	A	B	H	B	H	H	H	H	B	H	B	H	B	B	H	H	H	H	B	H	H	H	H	H	B	B	B	B	H
	A03	10739505	B	B	B	B	H	H	B	B	B	H	B	B	B	A	A	H	B	B	A	B	B	B	H	H	H	H	B	H	B	B	B	B	H	H	H	H	B	H	H	H	H	H	B	B	B	B	H
	A03	10739523	B	B	B	B	H	H	B	B	B	H	B	B	B	A	A	H	B	B	A	B	H	B	H	H	H	H	B	H	B	H	B	B	H	H	H	H	B	H	H	H	H	H	B	B	B	B	H
	A03	10739574	B	B	B	B	H	H	B	B	B	H	B	B	B	A	A	H	B	B	A	B	H	B	H	H	H	H	B	H	B	H	B	B	H	H	H	H	B	H	H	H	H	H	B	B	B	B	H
	A03	10836561	B	B	H	H	H	H	B	H	B	H	B	B	B	A	A	H	H	B	A	H	H	H	H	H	H	H	B	H	B	H	B	A	H	H	H	H	B	H	H	H	H	H	B	B	B	B	H
	A03	10913619	B	B	H	H	H	H	B	H	B	H	B	B	B	A	A	H	H	B	A	H	H	H	H	H	H	H	B	H	B	H	B	A	H	H	H	H	B	H	H	H	H	H	B	B	B	B	H
	A03	10913623	B	B	H	H	H	H	B	H	B	H	B	B	B	A	A	H	H	B	A	H	H	H	H	H	H	H	B	H	B	H	B	A	H	H	H	H	B	H	H	H	H	H	B	B	B	B	H
	A03	10913625	B	B	H	H	H	H	B	H	B	H	B	B	B	A	A	H	H	B	A	H	H	H	H	H	H	H	B	H	B	H	B	A	H	H	H	H	B	H	H	H	H	H	B	B	B	B	H
	A03	10913626	B	B	H	H	H	H	B	H	B	H	B	B	B	A	A	H	H	B	A	H	H	H	H	H	H	H	B	H	B	H	B	A	H	H	H	H	B	H	H	H	H	H	B	B	B	B	H
	A03	10974881	B	B	H	H	H	H	B	H	B	H	B	B	B	A	A	H	H	B	A	H	H	H	H	H	H	H	B	H	B	H	B	A	H	H	H	H	B	H	H	H	H	H	B	B	B	B	H
	A03	10975000	B	B	H	H	H	H	B	H	B	H	B	B	B	A	A	H	H	B	A	H	H	H	H	H	H	H	B	H	B	H	B	A	H	H	H	H	B	H	H	H	H	H	B	B	B	B	H
	A03	10975020	B	B	H	H	H	H	B	H	B	H	B	B	B	A	A	H	H	B	A	H	H	H	H	H	H	H	B	H	B	H	B	A	H	H	H	H	B	H	H	H	H	H	B	B	B	B	H
	A03	11159898	B	B	H	H	H	H	B	H	B	H	B	B	B	A	A	H	H	B	A	H	H	H	H	H	H	H	B	A	B	H	B	A	H	H	H	H	B	H	H	H	H	H	B	B	B	B	H
	A03	11163341	B	B	H	H	H	H	B	H	B	H	B	B	B	A	A	H	H	B	A	H	H	H	H	H	H	H	B	A	B	H	B	A	H	H	H	H	B	H	H	H	H	H	B	B	B	B	H
	A03	11163342	B	B	H	H	H	H	B	H	B	H	B	B	B	A	A	H	H	B	A	H	H	H	H	H	H	H	B	A	B	H	B	A	H	H	H	H	B	H	H	H	H	H	B	B	B	B	H
	A03	11195889	B	B	H	H	H	H	B	H	B	H	B	B	B	A	A	H	H	B	A	H	H	H	H	H	H	H	B	A	B	H	B	A	H	H	H	H	B	H	H	H	H	H	B	B	B	B	H
	A03	11210879	B	B	H	H	H	H	B	H	B	H	B	B	B	A	A	H	H	B	H	H	H	H	H	H	H	H	B	A	B	H	B	H	H	H	H	H	B	H	H	H	H	H	B	B	B	B	H
	A03	11210906	B	B	H	H	H	H	B	H	B	H	B	B	B	A	A	H	H	B	H	H	H	H	H	H	H	H	B	A	B	H	B	H	H	H	H	H	B	H	H	H	H	H	B	B	B	B	H
	A03	11214581	B	B	H	H	H	H	B	H	B	H	B	B	B	A	A	H	H	B	H	H	H	H	H	H	H	H	B	A	B	H	B	H	H	H	H	H	B	H	H	H	H	H	B	B	B	B	H
	A03	11214774	B	B	H	H	H	H	B	H	B	H	B	B	B	A	A	H	H	B	H	H	H	H	H	H	H	H	B	A	B	H	B	H	H	H	H	H	B	H	H	H	H	H	B	B	B	B	H
	A03	11214775	B	B	H	H	H	H	B	H	B	H	B	B	B	A	A	H	H	B	H	H	H	H	H	H	H	H	B	A	B	H	B	H	H	H	H	H	B	H	H	H	H	H	B	B	B	B	H
	A03	11430053	B	B	H	H	A	H	H	H	B	H	B	B	B	A	A	H	H	B	H	H	H	H	H	H	H	H	B	A	B	H	H	A	H	H	H	H	B	H	H	H	H	H	B	B	B	B	H
	A03	11430065	B	B	H	H	A	H	H	H	B	H	B	B	B	A	A	H	H	B	H	H	H	H	H	H	H	H	B	A	B	H	H	A	H	H	H	H	B	H	H	H	H	H	B	B	B	B	H
	A03	11505918	B	B	H	H	H	H	B	H	B	H	B	B	B	A	A	H	H	B	H	H	H	H	H	H	H	H	B	A	H	H	H	H	H	H	H	H	B	A	A	H	H	H	B	B	B	B	H
	A03	11505942	B	B	H	H	H	H	B	H	B	H	B	B	B	A	A	H	H	B	H	H	H	H	H	H	H	H	B	A	H	H	H	H	H	H	H	H	B	A	A	H	H	H	B	B	B	B	H
	A03	11506273	B	B	A	H	H	H	B	H	B	H	B	B	B	A	A	H	H	B	H	H	H	H	H	H	H	H	B	A	H	H	H	H	H	A	H	H	B	A	A	H	H	H	B	B	B	B	H
	A03	11506278	B	B	A	H	H	H	B	H	B	H	B	B	B	A	A	H	H	B	H	H	H	H	H	H	H	H	B	A	H	H	H	H	H	A	H	H	B	A	A	H	H	H	B	B	B	B	H
	A03	11506303	B	B	H	H	H	H	B	H	B	H	B	B	B	A	A	H	A	B	H	H	H	H	H	H	H	H	B	A	H	H	H	H	H	A	H	H	B	A	A	H	H	H	B	B	B	B	H
	A03	11623573	B	B	H	H	H	H	B	H	B	H	B	B	B	A	A	H	H	B	H	H	B	H	H	H	H	H	B	A	B	H	B	A	H	H	H	H	B	H	H	H	H	H	B	B	B	B	H
	A03	11679002	B	B	H	H	H	H	B	H	B	H	B	B	B	A	A	H	H	B	H	H	H	H	H	H	H	H	B	A	B	H	B	H	H	H	H	H	B	H	H	H	H	H	B	B	B	B	H
	A03	11701212	B	B	H	H	H	H	B	H	B	H	B	B	H	A	A	H	H	B	H	H	H	H	H	H	H	H	B	A	B	H	B	H	H	H	H	H	B	H	H	H	H	H	B	B	B	B	H
	A03	11730388	B	B	H	H	H	H	B	H	B	H	B	B	B	A	A	H	H	B	H	H	H	H	H	H	H	H	B	A	B	H	B	A	H	H	H	H	B	H	H	H	H	H	B	B	B	B	H
	A03	11731417	B	B	H	H	H	H	B	H	B	H	B	B	B	A	A	H	H	B	H	H	H	H	H	H	H	H	B	A	B	B	B	H	H	H	H	H	B	H	H	H	H	H	B	B	B	B	H
	A03	11781081	B	B	H	H	H	H	B	H	B	H	B	B	B	A	A	H	H	B	H	H	H	H	H	H	H	H	B	A	B	H	B	A	H	H	H	H	B	H	H	H	H	H	B	B	B	B	H
	A03	11781144	B	B	H	H	H	H	B	H	B	H	B	B	B	A	A	H	H	B	H	H	H	H	H	H	H	H	B	A	B	H	B	A	H	H	H	H	H	H	H	H	H	H	B	B	B	B	H
	A03	11781823	B	B	H	H	H	H	B	H	B	H	B	B	H	A	A	H	H	B	H	B	H	H	H	H	H	H	B	A	B	H	B	A	H	H	H	H	B	H	H	H	H	H	B	B	B	B	H
	A03	11781835	B	B	H	H	H	H	B	H	B	H	B	B	H	A	A	H	H	B	H	B	H	H	H	H	H	H	B	A	B	H	B	A	H	H	H	H	B	H	H	H	H	H	B	B	B	B	H
	A03	11783252	B	B	H	H	H	H	B	H	B	H	B	B	B	A	A	H	H	B	H	H	H	H	H	H	H	H	B	A	B	H	B	A	H	H	H	H	B	H	H	H	H	H	B	B	B	B	H
	A03	11913670	B	B	H	H	H	H	B	H	B	H	B	B	B	A	A	H	H	B	H	H	H	H	H	H	H	H	B	A	B	H	B	A	H	H	H	H	B	H	H	H	H	H	B	B	B	B	H
	A03	11913698	B	B	H	H	H	H	B	H	B	H	B	B	B	A	A	H	H	B	H	H	H	H	H	H	H	H	B	A	B	H	B	A	H	H	H	H	B	H	H	H	H	H	B	B	B	B	H
	A03	11913702	B	B	H	H	H	H	B	H	B	H	B	B	B	A	A	H	H	B	H	H	H	H	H	H	H	H	B	A	B	H	B	A	H	H	H	H	B	H	H	H	H	H	B	B	B	B	H
	A03	11913711	B	B	H	H	H	H	B	H	B	H	B	B	B	A	A	H	H	B	H	H	H	H	H	H	H	H	B	A	B	H	B	A	H	H	H	H	B	H	H	H	H	H	B	B	B	B	H
	A03	11991785	B	B	H	H	H	H	B	H	B	H	B	B	B	A	A	H	H	B	H	H	H	H	A	H	H	H	B	A	B	H	B	A	H	H	H	A	B	H	H	H	H	H	B	H	B	B	H
	A03	12084409	B	B	H	H	H	H	B	H	B	H	B	B	B	A	A	H	H	B	H	H	H	H	H	H	H	H	B	A	B	H	B	A	H	B	H	H	B	H	H	H	H	H	B	H	B	B	H
	A03	12094017	B	B	H	H	H	H	B	H	B	H	B	B	B	A	A	H	H	B	H	H	H	H	H	H	H	H	B	A	B	H	B	A	H	B	H	H	B	H	H	H	H	H	B	H	B	B	H
	A03	12115371	B	B	H	H	H	H	B	A	B	A	B	B	B	A	A	H	H	B	H	H	H	H	H	H	H	H	B	A	B	H	H	A	H	B	H	H	B	H	H	H	H	H	B	H	B	B	H
	A03	12115375	B	B	H	H	H	H	B	A	B	A	B	B	B	A	A	H	H	B	H	H	H	H	H	H	H	H	B	A	B	H	H	A	H	B	H	H	B	H	H	H	H	H	B	H	B	B	H
	A03	12115378	B	B	H	H	H	H	B	A	B	A	B	B	B	A	A	H	H	B	H	H	H	H	H	H	H	H	B	A	B	H	H	A	H	B	H	H	B	H	H	H	H	H	B	H	B	B	H
	A03	12115382	B	B	H	H	H	H	B	H	B	A	B	B	B	A	A	H	H	B	H	H	H	H	H	H	H	H	B	A	B	H	H	A	H	B	H	H	B	H	H	H	H	H	B	H	B	B	H
	A03	12115419	B	B	H	H	H	H	B	H	B	A	B	B	B	A	A	H	H	B	H	H	H	H	H	H	H	H	B	A	B	H	H	A	H	B	H	H	B	H	H	H	H	H	B	H	B	B	H
	A03	12160735	B	B	H	H	H	H	B	H	B	H	B	B	B	A	A	H	H	B	H	H	H	H	H	H	H	H	B	A	B	H	B	A	H	B	H	H	B	H	H	H	H	H	B	H	B	B	H
	A03	12400414	B	B	H	H	H	H	B	H	B	H	B	B	B	A	A	H	H	B	B	H	H	H	H	A	H	H	B	A	B	H	B	A	H	B	H	H	B	H	H	B	H	H	B	H	B	B	H
	A03	12400434	B	B	H	H	H	H	B	H	B	H	B	B	B	A	A	H	H	B	B	H	H	H	H	A	H	H	B	A	B	H	B	A	H	B	H	H	B	H	H	B	H	H	B	H	B	B	H
	A03	12400442	B	B	H	H	H	H	B	H	B	H	B	B	B	A	A	H	H	B	B	H	H	H	H	A	H	H	B	A	B	H	B	A	H	B	H	H	B	H	H	B	H	H	B	H	B	B	H
	A03	12400735	B	B	H	H	H	H	B	H	B	H	B	B	B	A	A	H	H	B	B	H	H	H	H	A	H	H	B	A	B	H	B	A	H	B	H	H	B	H	H	B	H	H	B	H	B	B	H
	A03	12400771	B	B	H	H	H	H	B	H	B	H	B	B	B	A	A	H	H	B	B	H	H	H	H	A	H	H	B	A	B	H	B	A	H	B	H	H	B	H	H	B	H	H	B	H	B	B	H
	A03	12476899	B	B	H	H	H	H	B	H	B	H	B	B	B	A	A	H	H	B	B	H	H	H	H	A	H	H	B	A	B	H	B	A	H	B	H	H	B	H	H	B	H	H	B	H	B	B	H
	A03	12476933	B	B	H	H	H	H	B	H	B	H	B	B	B	A	A	H	H	B	B	H	H	H	H	A	H	H	B	A	B	H	B	A	H	B	H	H	B	H	H	B	H	H	B	H	B	B	H
	A03	12677731	B	B	H	H	H	H	B	H	B	H	B	B	B	A	A	H	H	B	B	H	H	H	H	A	H	H	B	A	B	H	B	A	H	B	H	H	B	H	H	B	H	H	B	H	B	B	H
	A03	12677956	B	B	H	H	H	H	B	H	B	H	B	B	B	A	A	H	H	B	B	H	H	H	H	A	H	H	B	A	B	H	B	A	H	B	H	H	B	H	H	B	H	H	B	H	B	B	H
	A03	12736005	B	B	H	H	H	H	B	H	B	H	B	B	B	A	A	H	H	B	B	H	H	H	H	A	H	H	B	A	B	H	B	A	H	B	H	H	B	H	H	B	H	H	B	H	B	B	H
	A03	12736107	B	B	H	H	H	H	B	H	B	H	B	B	B	A	A	H	H	B	B	H	H	H	H	A	H	H	B	A	B	H	B	A	H	B	H	H	B	H	H	B	H	H	B	H	B	B	H
	A03	12850308	B	B	H	H	H	H	B	H	B	H	B	B	B	A	A	H	H	B	B	H	H	H	H	A	H	H	B	A	B	H	B	A	H	B	H	H	B	H	H	B	H	H	B	H	B	B	H
	A03	12897092	B	B	H	H	H	H	B	H	B	H	B	B	B	A	A	H	H	B	B	H	H	H	H	A	H	H	B	A	B	H	B	A	H	B	H	A	B	H	H	B	H	H	B	H	B	B	H
	A03	12897122	B	B	H	H	H	H	B	H	B	H	B	B	B	A	A	H	H	B	B	H	H	H	H	A	H	H	B	A	B	H	B	A	H	B	H	A	B	H	H	B	H	H	B	H	B	B	H
	A03	13091481	B	B	H	H	H	H	B	H	B	H	B	B	B	A	A	H	A	B	B	H	H	H	H	A	H	H	B	A	B	H	H	A	H	B	H	A	B	H	H	B	H	H	B	H	B	B	H
	A03	13091587	B	B	H	H	H	H	B	H	B	H	B	B	B	A	A	H	A	B	B	H	H	H	H	A	H	H	B	A	B	H	B	A	H	B	H	A	B	H	H	B	H	H	B	H	B	B	H
	A03	13091630	B	B	H	B	H	H	B	H	B	H	B	B	B	A	A	H	H	B	B	H	H	H	H	H	H	H	B	A	B	H	B	A	H	B	H	A	B	H	H	B	H	H	B	H	B	B	H
	A03	13091635	B	B	H	B	H	H	B	H	B	H	B	B	B	A	A	H	H	B	B	H	H	H	H	H	H	H	B	A	B	H	B	A	H	B	H	A	B	H	H	B	H	H	B	H	B	B	H
	A03	13162096	B	B	H	H	H	H	B	H	B	H	B	B	B	A	A	H	H	B	B	H	H	H	H	A	H	H	B	A	B	H	B	A	H	B	H	A	B	H	H	B	H	H	B	H	B	B	H
	A03	13162130	B	B	H	H	H	H	B	H	B	H	B	B	B	A	A	H	H	B	B	H	H	H	H	A	H	H	B	A	B	H	B	A	H	B	H	A	B	H	H	B	H	H	B	H	B	B	H
	A03	13162134	B	B	H	H	H	H	B	H	B	H	B	B	B	A	A	H	H	B	B	H	H	H	H	A	H	H	B	A	B	H	B	A	H	B	H	A	B	H	H	B	H	H	B	H	B	B	H
	A03	13162135	B	B	H	H	H	H	B	H	B	H	B	B	B	A	A	H	H	B	B	H	H	H	H	A	H	H	B	A	B	H	B	A	H	B	H	A	B	H	H	B	H	H	B	H	B	B	H
	A03	13162345	B	B	H	H	H	H	B	H	B	H	B	B	B	A	A	H	H	B	B	H	H	H	H	A	H	H	B	A	B	H	B	A	H	B	H	A	B	H	H	B	H	H	B	H	B	B	H
	A03	13251113	B	B	H	H	H	H	B	H	B	H	B	B	H	A	A	H	H	B	B	H	H	H	H	A	H	H	B	A	B	H	B	A	H	B	H	A	B	H	H	B	H	H	B	H	B	B	H
	A03	13251119	B	B	H	H	H	H	B	H	B	H	B	B	H	A	A	H	H	B	B	H	H	H	H	A	H	H	B	A	B	H	B	A	H	B	H	A	B	H	H	B	H	H	B	H	B	B	H
	A03	13251155	B	B	H	H	H	H	B	H	B	H	B	B	H	A	A	H	H	B	B	H	H	H	H	A	H	H	B	A	B	H	B	A	H	B	H	A	B	H	H	B	H	H	B	H	B	B	H
	A03	13251172	B	B	H	H	H	H	B	H	B	H	B	B	H	A	A	H	H	B	B	H	H	H	H	A	H	H	B	A	B	H	B	A	H	B	H	A	B	H	H	B	H	H	B	H	B	B	H
	A03	13251182	B	B	H	H	H	H	B	H	B	H	B	B	H	A	A	H	H	B	B	H	H	H	H	A	H	H	B	A	B	H	B	A	H	B	H	A	B	H	H	B	H	H	B	H	B	B	H
	A03	13251255	B	B	H	H	H	H	B	H	B	H	B	B	H	A	A	H	H	B	B	H	H	H	H	A	H	H	B	A	B	H	B	A	H	B	H	A	B	H	H	B	H	H	B	H	B	B	H
	A03	13251280	B	B	H	H	H	H	B	H	B	H	B	B	H	A	A	H	H	B	B	H	H	H	H	A	H	H	B	A	B	H	B	A	H	B	H	A	B	H	H	B	H	H	B	H	B	B	H
	A03	13280589	B	B	H	H	H	H	B	H	B	H	B	B	B	A	A	H	H	B	B	H	H	H	H	A	H	H	B	A	B	H	B	A	H	B	H	A	B	H	H	B	H	H	B	H	B	B	H
	A03	13282744	B	B	H	B	H	H	B	H	B	H	B	B	B	A	A	B	B	B	B	B	H	H	H	A	B	H	B	A	B	H	B	A	H	B	B	A	B	B	H	B	B	H	B	H	B	B	H
	A03	13367211	B	B	H	H	H	H	B	H	B	H	B	B	B	A	A	H	H	B	B	H	H	H	H	A	H	H	B	A	B	H	B	A	H	B	H	A	B	H	H	B	H	H	B	H	B	B	H
	A03	13367220	B	B	H	H	H	H	B	H	B	H	B	B	B	A	A	H	H	B	B	H	H	H	H	A	H	H	B	A	B	H	B	A	H	B	H	A	B	H	H	B	H	H	B	H	B	B	H
	A03	13367230	B	B	H	H	H	H	B	H	B	H	B	B	B	A	A	H	H	B	B	H	H	H	H	A	H	H	B	A	B	H	B	A	H	B	H	A	B	H	H	B	H	H	B	H	B	B	H
	A03	13367633	B	B	H	H	H	H	B	H	B	H	B	B	B	A	A	H	H	B	B	H	H	H	H	A	H	H	B	A	B	H	B	A	H	B	H	A	B	H	H	B	H	H	B	H	B	B	H
	A03	13367671	B	B	H	H	H	H	B	H	B	H	B	B	B	A	A	H	H	B	B	H	H	H	H	A	H	H	B	A	B	H	B	A	H	B	H	A	B	H	H	B	H	H	B	H	B	B	H
	A03	13367672	B	B	H	H	H	H	B	H	B	H	B	B	B	A	A	H	H	B	B	H	H	H	H	A	H	H	B	A	B	H	B	A	H	B	H	A	B	H	H	B	H	H	B	H	B	B	H
	A03	13498706	B	B	H	H	H	H	B	H	B	H	B	B	B	A	A	H	H	B	B	H	H	H	H	A	B	H	B	A	B	H	B	A	H	B	H	A	B	H	H	B	H	H	B	H	B	B	H
	A03	13607067	B	B	H	H	H	B	B	H	B	B	B	B	B	A	A	H	H	B	B	H	H	H	H	A	B	H	B	A	B	H	B	A	H	B	H	A	B	H	H	B	H	H	B	H	B	B	H
	A03	13609237	B	B	H	H	H	H	B	H	B	H	B	B	B	A	A	H	H	B	B	H	H	H	H	A	B	H	B	A	B	H	B	A	H	B	H	A	B	H	H	B	H	H	B	H	B	B	H
	A03	14033798	B	B	H	H	H	H	B	H	B	H	B	B	B	A	A	H	H	B	B	H	H	H	H	A	B	H	B	A	B	H	B	H	H	B	H	A	B	H	H	B	H	H	B	H	B	B	H
	A03	14033828	B	B	H	H	H	H	B	H	B	H	B	B	B	A	A	H	H	B	B	H	H	H	H	A	B	H	B	A	B	H	B	H	H	B	H	A	B	H	H	B	H	H	B	H	B	B	H
	A03	14088112	B	B	H	H	H	H	B	H	B	H	B	B	B	A	A	H	H	B	B	H	H	H	H	A	B	H	B	A	B	H	B	H	H	B	H	A	B	H	H	B	H	H	B	H	B	B	H
	A03	14088136	B	B	H	H	H	H	B	H	B	H	B	B	B	A	A	H	H	B	B	H	H	H	H	A	B	H	B	A	B	H	B	H	H	B	H	A	B	H	H	B	H	H	B	H	B	B	H
	A03	14088153	B	B	H	H	H	H	B	H	B	H	B	B	B	A	A	H	H	B	B	H	H	H	H	A	B	H	B	A	B	H	B	H	H	B	H	A	B	H	H	B	H	H	B	H	B	B	H
	A03	14106952	B	B	H	H	H	H	B	H	B	H	B	B	B	A	A	H	H	B	B	H	H	H	H	A	B	H	B	A	B	H	B	H	H	B	H	A	B	H	H	B	H	H	B	H	B	B	H
	A03	14142056	B	B	H	H	H	H	B	H	B	H	B	B	B	A	A	B	H	B	B	H	H	H	H	A	B	H	B	A	B	H	B	B	H	B	H	A	B	H	H	B	H	H	B	H	B	B	H
	A03	14142057	B	B	H	H	H	H	B	H	B	H	B	B	B	A	A	B	H	B	B	H	H	H	H	A	B	H	B	A	B	H	B	B	H	B	H	A	B	H	H	B	H	H	B	H	B	B	H
	A03	14142071	B	B	H	H	H	H	B	H	B	H	B	B	B	A	A	B	H	B	B	H	H	H	H	A	B	H	B	A	B	H	B	B	H	B	H	A	B	H	H	B	H	H	B	H	B	B	H
	A03	14142079	B	B	H	H	H	H	B	H	B	H	B	B	B	A	A	B	H	B	B	H	H	H	H	A	B	H	B	A	B	H	B	B	H	B	H	A	B	H	H	B	H	H	B	H	B	B	H
	A03	14142189	B	B	H	H	H	B	B	H	B	H	B	B	B	A	A	H	B	B	B	H	H	H	H	A	B	H	B	A	B	H	B	H	B	B	B	A	B	H	H	B	H	H	B	B	B	B	B
	A03	14142198	B	B	H	H	H	B	B	H	B	B	B	B	B	A	A	H	B	B	B	H	H	H	H	A	B	H	B	A	B	H	B	H	B	B	B	A	B	H	H	B	H	H	B	B	B	B	B
	A03	14142201	B	B	H	H	H	B	B	H	B	B	B	B	B	A	A	H	B	B	B	H	H	H	H	A	B	H	B	A	B	H	B	H	B	B	B	A	B	H	H	B	H	H	B	B	B	B	B
	A03	14142204	B	B	H	H	H	B	B	H	B	B	B	B	B	A	A	H	B	B	B	H	H	H	H	A	B	H	B	A	B	H	B	H	B	B	B	A	B	H	H	B	H	H	B	H	B	B	B
	A03	14142576	B	B	H	H	H	H	B	H	B	H	B	B	B	A	A	H	A	B	B	H	H	H	H	A	B	H	B	A	B	H	B	H	H	B	H	A	B	H	H	B	H	H	B	H	B	B	A
	A03	14170310	B	B	H	H	H	H	B	H	B	H	B	B	B	A	A	H	B	B	B	H	H	H	H	A	B	H	B	A	B	H	B	B	B	B	H	A	B	H	H	B	H	H	B	B	B	B	H
	A03	14182770	B	B	H	H	H	H	B	H	B	H	B	B	B	A	A	H	H	B	B	H	H	H	H	A	B	H	B	A	B	H	B	H	H	B	H	A	B	H	H	B	H	H	B	H	B	B	H
	A03	14182839	B	B	H	H	H	H	B	H	B	H	B	B	B	A	A	H	H	B	B	H	H	H	H	A	B	H	B	A	B	H	B	H	H	B	H	A	B	H	H	B	H	H	B	H	B	B	H
	A03	14195379	B	B	H	H	H	H	B	H	B	H	B	B	B	A	A	H	H	B	B	H	H	H	H	A	B	H	B	A	B	H	B	H	H	B	H	A	B	H	H	B	H	H	B	H	B	B	H
	A03	14291674	B	B	H	A	H	H	H	H	B	H	B	B	H	A	A	H	H	H	B	A	H	H	H	A	B	A	B	A	B	H	B	H	H	B	H	A	B	H	H	B	H	A	B	H	B	B	H
	A03	14323798	B	B	H	H	H	H	B	H	B	H	B	B	B	A	A	H	H	B	B	H	H	H	H	H	B	H	B	A	B	H	B	H	H	B	H	A	B	H	H	B	H	H	B	H	B	B	H
	A03	14334152	B	B	H	H	H	H	B	H	B	H	B	B	B	A	A	H	H	B	B	H	H	H	H	A	B	H	B	A	B	H	B	H	H	B	H	A	B	H	H	B	H	H	B	H	B	B	H
	A03	14334174	B	B	H	H	H	H	B	H	B	B	B	B	B	A	A	H	B	B	B	H	H	H	H	A	B	H	B	A	B	B	B	B	H	B	H	A	B	B	B	B	B	H	B	H	B	B	H
	A03	14334178	B	B	B	B	H	B	B	B	B	B	B	B	B	A	A	H	B	B	B	H	H	H	H	A	B	H	B	A	B	B	B	B	H	B	B	A	B	B	B	B	B	B	B	H	B	B	B
	A03	14334448	B	B	H	H	H	H	B	H	B	H	B	B	B	A	H	H	H	B	B	H	H	H	H	A	B	H	B	A	B	H	B	H	H	B	H	A	B	H	H	B	H	H	B	H	B	B	H
	A03	14433764	B	B	H	H	H	H	B	H	B	H	B	B	H	A	A	H	H	B	B	H	H	H	H	A	B	H	B	A	B	H	B	H	H	B	H	A	B	H	H	B	H	H	B	H	B	H	H
	A03	14433766	B	B	H	H	H	H	B	H	B	H	B	B	H	A	A	H	H	B	B	H	H	H	H	A	B	H	B	A	B	H	B	H	H	B	H	A	B	H	H	B	H	H	B	H	B	H	H
	A03	14585009	B	B	H	H	H	H	B	H	B	H	B	B	H	A	A	H	H	B	B	H	H	H	H	A	B	H	B	A	B	H	B	H	H	B	H	A	B	H	H	B	H	H	B	H	B	B	H
	A03	14585191	B	B	H	H	H	H	B	H	B	H	B	B	H	A	A	H	H	B	B	H	H	H	H	A	B	H	B	A	B	H	B	H	H	B	H	A	B	H	H	B	H	H	B	H	B	B	H
	A03	14608699	B	B	H	H	H	H	B	H	B	H	B	B	H	A	A	H	H	B	B	H	H	H	H	A	B	H	B	A	B	H	B	H	H	B	H	A	B	H	H	B	H	H	B	H	B	H	H
	A03	14869092	B	B	H	H	H	H	B	H	B	H	B	B	H	A	A	H	H	B	B	H	H	H	H	A	B	H	B	A	B	H	B	H	H	B	H	A	B	H	H	B	H	H	B	H	B	H	H
	A03	15044627	B	B	H	H	H	H	B	H	B	H	B	B	H	A	A	H	H	B	B	H	H	H	H	A	B	H	B	A	B	H	B	H	H	B	H	A	B	H	H	B	H	H	H	H	B	H	H
	A03	15048336	B	B	H	H	H	H	B	H	B	H	B	B	H	A	A	H	H	B	B	H	H	H	H	A	B	H	B	A	B	H	B	H	H	B	H	A	B	H	H	B	H	H	H	H	B	H	H
	A03	15056753	B	B	H	H	H	H	B	H	B	H	B	B	H	A	A	H	H	B	B	H	H	H	H	A	B	H	B	A	B	H	B	H	H	B	H	A	B	H	H	B	H	H	H	H	B	H	H
	A03	15152811	B	B	H	H	H	H	B	H	B	H	B	B	H	A	A	H	H	B	B	H	H	H	H	A	B	H	B	A	B	H	B	H	H	B	H	A	B	H	H	B	H	H	H	H	B	H	H
	A03	15152915	B	B	H	H	H	H	B	H	B	H	B	B	H	A	A	H	H	B	B	H	H	H	H	A	B	H	B	A	B	H	B	H	H	B	H	A	B	H	H	B	H	H	H	B	B	H	H
	A03	15272903	B	B	H	H	H	H	B	H	B	H	B	B	H	A	A	H	H	B	B	H	H	H	H	A	B	H	B	A	B	H	B	H	H	B	H	A	B	H	H	B	H	H	H	B	B	H	H
	A03	15272907	B	B	H	H	H	H	B	H	B	H	B	B	H	A	A	H	H	B	B	H	H	H	H	A	B	H	B	A	B	H	B	H	H	B	H	A	B	H	H	B	H	H	H	H	B	H	H
	A03	15272950	B	B	H	H	H	H	B	H	B	H	B	B	H	A	A	H	H	B	B	H	H	H	H	A	B	H	B	A	B	H	B	H	H	B	H	A	B	H	H	B	H	H	H	H	B	H	H
	A03	15410365	B	B	H	H	H	H	B	H	H	H	B	B	H	A	A	H	H	B	B	H	H	H	H	A	B	H	B	A	B	H	B	H	H	B	H	A	B	H	H	B	H	H	H	H	B	H	H
	A03	15432861	B	B	H	H	H	H	B	H	H	H	B	B	H	A	A	H	H	B	B	H	H	H	H	A	B	H	B	A	B	H	B	H	H	B	H	A	B	H	H	B	H	H	H	H	B	H	H
	A03	15432963	B	B	H	H	H	H	B	H	H	H	B	B	H	A	A	H	H	B	B	H	H	H	H	A	B	H	B	A	B	H	B	H	H	B	H	A	B	H	H	B	H	H	H	H	B	H	H
	A03	15433005	B	B	H	H	H	H	B	H	H	H	B	B	H	A	A	H	H	B	B	H	H	H	H	A	B	H	B	A	B	H	B	H	H	B	H	A	B	H	H	B	H	H	H	H	B	H	H
	A03	15433015	B	B	H	H	H	H	B	H	H	H	B	B	H	A	A	H	H	B	B	H	H	H	H	A	B	H	B	A	B	H	B	H	H	B	H	A	B	H	H	B	H	H	H	H	B	H	H
	A03	15433025	B	B	H	H	H	H	B	H	H	H	B	B	H	A	A	H	H	B	B	H	H	H	H	A	B	H	B	A	B	H	B	H	H	B	H	A	B	H	H	B	H	H	H	H	B	H	H
	A03	15433026	B	B	H	H	H	H	B	H	H	H	B	B	H	A	A	H	H	B	B	H	H	H	H	A	B	H	B	A	B	H	B	H	H	B	H	A	B	H	H	B	H	H	H	H	B	H	H
	A03	15476479	B	B	H	H	H	H	B	H	H	H	B	B	H	A	A	H	H	B	B	H	H	H	H	A	B	H	B	A	B	H	B	H	B	B	H	A	B	B	H	B	H	H	H	B	B	H	H
	A03	15476480	B	B	H	H	H	H	B	H	H	H	B	B	H	A	A	H	H	B	B	H	H	H	H	A	B	H	B	A	B	H	B	H	B	B	H	A	B	B	H	B	H	H	H	B	B	H	H
	A03	15476488	B	B	H	H	H	H	B	H	H	H	B	B	H	A	A	H	H	B	B	H	H	H	H	A	B	H	B	A	B	H	B	H	B	B	H	A	B	B	H	B	H	H	H	B	B	H	H
	A03	15476500	B	B	H	H	H	H	B	H	H	H	B	B	H	A	A	H	H	B	B	H	H	H	H	A	B	H	B	A	B	H	B	H	B	B	H	A	B	B	H	B	H	H	H	B	B	H	H
	A03	15476552	B	B	H	H	H	H	B	H	H	H	B	B	H	A	A	H	H	B	B	H	H	H	H	A	B	H	B	A	B	H	B	H	B	B	H	A	B	B	H	B	H	H	H	B	B	H	H
	A03	15476578	B	B	H	H	H	H	B	H	H	H	B	B	H	A	A	H	H	B	B	H	H	H	H	A	B	H	B	A	B	H	B	H	B	B	H	A	B	B	H	B	H	H	H	B	B	H	H
	A03	15476592	B	B	H	H	H	H	B	H	H	H	B	B	H	A	A	H	H	B	B	H	H	H	H	A	B	H	B	A	B	H	B	H	B	B	H	A	B	B	H	B	H	H	H	B	B	H	H
	A03	15484669	B	B	H	H	H	H	B	H	H	H	B	B	H	A	A	H	H	B	B	H	H	H	H	A	B	H	B	A	B	H	B	H	H	B	H	A	B	H	H	B	H	H	H	H	B	H	H
	A03	15484675	B	B	H	H	H	H	B	H	H	H	B	B	H	A	A	H	H	B	B	H	H	H	H	A	B	H	B	A	B	H	B	H	H	B	H	A	B	H	H	B	H	H	H	H	B	H	H
	A03	15484687	B	B	H	H	H	H	B	B	H	H	B	B	H	A	A	H	H	B	B	H	H	H	H	A	B	H	B	A	B	B	B	H	H	B	H	A	B	B	H	B	H	H	H	H	B	H	H
	A03	15484690	B	B	H	H	H	H	B	H	H	H	B	B	H	A	A	H	H	B	B	H	H	H	H	A	B	H	B	A	B	B	B	H	H	B	H	A	B	B	H	B	H	H	H	H	B	H	H
	A03	15484705	B	B	H	H	H	H	B	H	H	H	B	B	H	A	A	H	H	B	B	H	H	H	H	A	B	H	B	A	B	H	B	H	H	B	H	A	B	H	H	B	H	H	H	H	B	H	H
	A03	15484717	B	B	H	H	H	H	B	H	H	H	B	B	H	A	A	H	H	B	B	H	H	H	H	A	B	H	B	A	B	H	B	H	H	B	H	A	B	H	H	B	H	H	H	H	B	H	H
	A03	15495909	B	B	H	H	H	H	B	H	H	H	B	B	H	A	A	H	H	B	B	H	H	H	H	A	B	H	B	A	B	H	B	H	H	B	H	A	B	H	H	B	H	H	H	H	B	H	H
	A03	15496021	B	B	H	H	H	H	B	H	B	H	B	B	H	A	A	B	H	B	B	H	B	H	H	A	B	H	B	A	B	H	B	H	H	B	H	A	B	H	B	B	H	H	H	H	B	H	H
	A03	15496028	B	B	H	H	H	H	B	H	B	H	B	B	H	A	A	B	H	B	B	H	B	H	H	A	B	H	B	A	B	H	B	H	H	B	H	A	B	H	B	B	H	H	H	H	B	H	H
	A03	15496063	B	B	H	H	H	H	B	H	B	H	B	B	H	A	A	B	H	B	B	H	B	H	H	A	B	H	B	A	B	H	B	H	H	B	H	A	B	H	B	B	H	H	H	H	B	B	H
	A03	15496064	B	B	H	H	H	H	B	H	B	H	B	B	H	A	A	B	H	B	B	H	B	H	H	A	B	H	B	A	B	H	B	H	H	B	H	A	B	H	B	B	H	H	H	H	B	B	H
	A03	15541338	B	B	H	H	H	H	B	H	H	H	B	B	H	A	A	H	H	B	B	H	H	H	H	A	B	H	B	A	B	H	B	H	H	B	H	A	B	H	H	B	H	H	H	H	B	H	H
	A03	15746493	B	B	H	H	H	H	B	H	H	H	B	B	H	A	A	H	H	B	B	H	H	H	H	A	B	H	B	A	B	H	B	H	H	B	H	A	B	H	H	B	H	H	H	H	B	H	H
	A03	15776356	B	B	H	H	H	H	B	H	H	H	B	B	H	A	A	H	H	B	B	H	H	H	H	A	B	H	B	A	B	H	B	H	H	B	H	A	B	H	H	B	H	H	H	H	B	H	H
	A03	15968637	B	B	H	H	H	H	B	H	H	H	B	B	H	A	A	H	H	B	B	H	H	H	H	A	B	H	B	A	B	H	B	H	H	B	H	A	B	H	H	B	H	H	H	H	B	H	H
	A03	15979389	B	B	H	B	H	H	B	H	H	H	B	B	H	A	A	H	H	B	B	A	H	H	H	A	B	B	B	A	B	H	B	H	H	B	H	A	B	H	H	B	H	H	H	H	B	H	A
	A03	15979428	B	B	H	B	H	H	B	H	H	H	B	B	H	A	A	H	H	B	B	A	H	H	H	A	B	B	B	A	B	H	B	H	H	B	H	A	B	H	H	B	H	H	H	H	B	H	A
	A03	15983400	B	B	H	H	H	H	B	H	H	H	B	B	H	H	A	H	H	B	B	H	H	H	H	H	B	H	B	A	B	H	B	H	H	B	H	A	B	H	H	B	H	H	H	H	B	H	H
	A03	15983470	B	B	H	H	H	H	B	H	H	H	B	B	H	H	A	H	H	B	B	H	H	H	H	H	B	H	B	A	B	H	B	H	H	B	H	A	B	H	H	B	H	H	H	H	B	H	H
	A03	15984025	B	B	H	H	H	H	B	H	H	H	B	B	H	A	A	H	H	B	B	H	H	H	H	A	B	B	B	A	B	H	B	H	H	B	H	A	B	H	H	B	H	H	H	H	B	H	H
	A03	15984296	B	B	H	H	H	H	B	H	H	H	B	B	H	A	A	H	H	B	B	H	H	H	H	A	B	H	B	A	B	H	B	H	H	B	H	A	B	H	H	B	H	H	H	H	B	H	H
	A03	15984311	B	B	H	H	H	H	B	H	H	H	B	B	H	A	A	H	H	B	B	H	H	H	H	A	B	B	B	A	B	H	B	H	H	B	H	A	B	H	H	B	H	H	H	H	B	H	H
	A03	15984607	B	B	B	H	H	H	B	H	H	H	B	B	H	A	A	H	H	B	B	H	H	H	H	A	B	H	B	A	B	H	B	H	H	B	H	A	B	H	H	B	H	H	H	H	B	H	H
	A03	15987376	B	B	H	H	H	H	B	H	H	H	B	B	H	A	A	H	H	B	B	H	H	H	H	A	B	H	B	A	B	H	B	H	H	B	H	A	B	H	H	B	H	H	H	H	B	H	H
	A03	16044571	B	B	H	H	H	H	B	H	H	H	B	B	H	A	A	H	H	B	B	H	H	H	H	A	B	H	B	A	B	H	B	H	H	B	H	A	B	H	H	B	H	H	H	H	B	H	H
	A03	16080715	B	B	H	H	H	H	B	H	H	H	B	B	H	A	A	H	H	B	B	H	H	H	H	A	B	H	B	A	B	H	B	H	H	B	H	A	B	H	H	B	H	H	H	H	B	H	H
	A03	16080716	B	B	H	H	H	H	B	H	H	H	B	B	H	A	A	H	H	B	B	H	H	H	H	A	B	H	B	A	B	H	B	H	H	B	H	A	B	H	H	B	H	H	H	H	B	H	H
	A03	16080719	B	B	H	H	H	H	B	H	H	H	B	B	H	A	A	H	H	B	B	H	H	H	H	A	B	H	B	A	B	H	B	H	H	B	H	A	B	H	H	B	H	H	H	H	B	H	H
	A03	16080743	B	B	H	H	H	H	B	H	H	H	B	B	H	A	A	H	H	B	B	H	H	H	H	A	B	H	B	A	B	H	B	H	H	B	H	A	B	H	H	B	H	H	H	H	B	H	H
	A03	16080761	B	B	H	H	H	H	B	H	H	H	B	B	H	A	A	H	H	B	B	H	H	H	H	A	B	H	B	A	B	H	B	H	H	B	H	A	B	H	H	B	H	H	H	H	B	H	H
	A03	16229793	B	B	H	H	H	H	B	H	H	H	B	H	H	A	A	H	H	B	B	H	H	H	H	A	B	H	B	A	B	H	B	H	H	B	H	A	B	H	H	H	H	H	H	H	B	H	H
	A03	16304437	B	B	H	H	H	H	B	H	H	H	B	H	H	A	A	H	H	B	B	H	H	H	H	A	B	H	B	A	B	H	B	H	H	B	H	A	B	H	H	B	H	H	H	H	B	H	H
	A03	16345321	B	B	H	H	H	H	B	H	H	H	B	H	H	A	A	H	H	B	B	H	H	H	H	A	B	H	B	A	B	H	B	H	H	B	H	A	B	H	H	B	H	H	H	H	B	H	H
	A03	16345402	B	B	H	H	H	H	B	H	H	H	B	H	H	A	A	H	H	B	B	H	H	H	H	A	B	H	B	A	B	H	B	H	H	B	H	A	B	H	H	B	H	H	H	H	B	H	H
	A03	16345403	B	B	H	H	H	H	B	H	H	H	B	H	H	A	A	H	H	B	B	H	H	H	H	A	B	H	B	A	B	H	B	H	H	B	H	A	B	H	H	B	H	H	H	H	B	H	H
	A03	16345430	B	B	H	H	H	H	B	H	H	H	B	H	H	A	A	H	H	B	B	H	H	H	H	A	B	H	B	A	B	H	B	H	H	B	H	A	B	H	H	B	H	H	H	H	B	H	H
	A03	16345431	B	B	H	H	H	H	B	H	H	H	B	H	H	A	A	H	H	B	B	H	H	H	H	A	B	H	B	A	B	H	B	H	H	B	H	A	B	H	H	B	H	H	H	H	B	H	H
	A03	16345433	B	B	H	H	H	H	B	H	H	H	B	H	H	A	A	H	H	B	B	H	H	H	H	A	B	H	B	A	B	H	B	H	H	B	H	A	B	H	H	B	H	H	H	H	B	H	H
	A03	16345434	B	B	H	H	H	H	B	H	H	H	B	H	H	A	A	H	H	B	B	H	H	H	H	A	B	H	B	A	B	H	B	H	H	B	H	A	B	H	H	B	H	H	H	H	B	H	H
	A03	16672765	B	B	H	H	H	H	B	H	H	H	B	H	H	A	A	H	H	B	B	H	H	H	H	A	B	H	B	A	H	H	B	H	H	B	H	A	B	H	H	B	H	H	H	H	B	H	H
	A03	16672770	B	B	H	H	H	H	B	H	H	H	B	H	H	A	A	H	H	B	B	H	H	H	H	A	B	H	B	A	H	H	B	H	H	B	H	A	B	H	H	B	H	H	H	H	B	H	H
	A03	16672773	B	B	H	H	H	H	B	H	H	H	B	H	H	A	A	H	H	B	B	H	H	H	H	A	B	H	B	A	H	H	B	H	H	B	H	A	B	H	H	B	H	H	H	H	B	H	H
	A03	16672786	B	B	H	H	H	H	B	H	H	H	B	H	H	A	A	H	H	B	B	H	H	H	H	A	B	H	B	A	H	H	B	H	H	B	H	A	B	H	H	B	H	H	H	H	B	H	H
	A03	16672794	B	B	H	H	H	H	B	H	H	H	B	H	H	A	A	H	H	B	B	H	H	H	H	A	B	H	B	A	H	H	B	H	H	B	H	A	B	H	H	B	H	H	H	H	B	H	H
	A03	16719385	B	B	H	H	H	H	B	H	H	H	B	H	H	A	A	H	H	B	B	H	H	H	H	A	B	H	B	A	H	H	B	H	H	B	H	A	B	H	H	B	H	H	H	H	B	H	H
	A03	16734891	B	B	H	H	H	H	B	H	H	H	B	H	H	A	A	H	H	B	B	H	H	H	H	A	B	H	B	A	H	H	B	H	H	B	H	A	B	H	H	B	H	H	H	H	B	H	H
	A03	16734892	B	B	H	H	H	H	B	H	H	H	B	H	H	A	A	H	H	B	B	H	H	H	H	A	B	H	B	A	H	H	B	H	H	B	H	A	B	H	H	B	H	H	H	H	B	H	H
	A03	16759866	B	B	H	H	H	H	B	H	H	H	B	H	H	A	A	H	H	B	B	H	H	H	H	A	B	H	B	A	H	H	B	H	H	B	H	A	B	H	H	B	H	H	H	H	B	H	H
	A03	16759880	B	B	H	H	H	H	B	H	H	H	B	H	H	A	A	H	H	B	B	H	H	H	H	A	B	H	B	A	H	H	B	H	H	B	H	A	B	H	H	B	H	H	H	H	B	H	H
	A03	16760027	B	B	H	H	H	H	B	H	H	H	B	H	H	A	A	H	H	B	B	H	H	H	H	A	B	H	B	A	H	H	B	H	H	B	H	A	B	H	H	B	H	H	H	H	B	H	H
	A03	16760095	B	B	H	H	H	H	B	H	H	H	B	H	H	A	A	H	H	B	B	H	H	H	H	A	B	H	B	A	H	H	B	H	H	B	H	A	B	H	H	B	H	H	H	H	B	H	H
	A03	16760097	B	B	H	H	H	H	B	H	H	H	B	H	H	A	A	H	H	B	B	H	H	H	H	A	B	H	B	A	H	H	B	H	H	B	H	A	B	H	H	B	H	H	H	H	B	H	H
	A03	16983307	B	B	H	H	H	H	B	H	H	H	B	H	H	A	A	H	H	B	B	H	H	H	H	A	B	H	B	A	H	H	B	B	H	B	H	A	B	H	H	B	H	H	H	H	B	H	H
	A03	16983351	B	B	H	H	H	H	B	H	H	H	B	H	H	A	A	H	H	B	B	H	H	H	H	A	B	H	B	A	H	H	B	B	H	B	H	A	B	H	H	B	H	H	H	H	B	A	H
	A03	17207900	B	B	H	H	H	H	B	H	H	H	B	H	H	A	A	H	H	B	B	H	H	H	H	A	B	H	B	A	H	H	B	B	H	B	H	A	B	H	H	B	H	H	H	H	B	H	H
	A03	17207975	B	B	H	H	H	H	B	H	H	H	B	H	H	A	A	H	H	B	B	H	H	H	H	A	B	H	B	A	H	H	B	B	H	B	H	A	B	H	H	B	H	H	H	H	B	H	H
	A03	17207976	B	B	H	H	H	H	B	H	H	H	B	H	H	A	A	H	H	B	B	H	H	H	H	A	B	H	B	A	H	H	B	B	H	B	H	A	B	H	H	B	H	H	H	H	B	H	H
	A03	17207986	B	B	H	H	H	H	B	H	H	H	B	H	H	A	A	H	H	B	B	H	H	H	H	A	B	H	B	A	H	H	B	B	H	B	H	A	B	H	H	B	H	H	H	H	B	H	H
	A03	17423741	B	B	H	H	H	H	B	H	H	H	B	H	H	A	A	H	H	B	B	H	H	H	H	A	B	H	B	A	H	H	B	B	H	B	H	A	B	H	H	B	H	H	H	H	B	H	H
	A03	17423842	B	B	H	H	H	H	B	H	H	H	B	H	H	A	A	H	H	B	B	H	H	H	H	A	B	H	B	A	H	H	B	B	H	B	H	A	B	H	H	B	H	H	H	H	B	H	H
	A03	17423847	B	B	H	H	H	H	B	H	H	H	B	H	H	A	A	H	H	B	B	H	H	H	H	A	B	H	B	A	H	H	B	B	H	B	H	A	B	H	H	B	H	H	H	H	B	H	H
	A03	17423889	B	B	H	H	H	H	B	H	H	H	B	H	H	A	A	H	H	B	B	H	H	H	H	A	B	H	B	A	H	H	B	B	H	B	H	A	B	H	H	B	H	H	H	H	B	H	H
	A03	17442988	B	B	H	H	H	H	B	H	H	H	B	H	H	A	A	H	H	B	B	H	H	H	H	A	B	H	B	A	H	H	B	B	H	B	H	A	B	H	H	B	H	H	H	H	B	H	H
	A03	17443198	B	B	H	H	H	H	B	H	H	H	B	H	H	A	A	H	H	B	B	H	H	H	H	A	B	H	B	A	H	H	B	B	H	B	H	A	B	H	H	B	H	H	H	H	B	H	H
	A03	17443213	B	B	H	H	H	H	B	H	H	H	B	H	H	A	A	H	H	B	B	H	H	H	H	A	B	H	B	A	H	H	B	B	H	B	H	A	B	H	H	B	H	H	H	H	B	H	H
	A03	17443215	B	B	H	H	H	H	B	H	H	H	B	H	H	A	A	H	H	B	B	H	H	H	H	A	B	H	B	A	H	H	B	B	H	B	H	A	B	H	H	B	H	H	H	H	B	H	H
	A03	17443225	B	B	H	H	H	H	B	H	H	H	B	H	H	A	A	H	H	B	B	H	H	H	H	A	B	H	B	A	H	H	B	B	H	B	H	A	B	H	H	B	H	H	H	H	B	H	H
	A03	17443240	B	B	H	H	H	H	B	H	H	H	B	H	H	A	A	H	H	B	B	H	H	H	H	A	B	H	B	A	H	H	B	B	H	B	H	A	B	H	H	B	H	H	H	H	B	H	H
	A03	17491242	B	B	H	H	H	H	B	H	H	H	B	H	H	A	A	A	H	B	B	H	H	H	H	A	B	H	B	A	H	H	B	B	H	B	H	A	B	H	H	H	H	H	H	H	B	H	H
	A03	17540983	B	B	H	B	H	A	B	H	H	H	B	H	H	A	A	A	H	B	B	H	H	H	H	A	B	H	B	A	H	H	B	B	A	B	H	A	B	B	H	B	H	H	H	H	B	H	A
	A03	17541419	B	B	H	B	H	B	B	H	H	H	B	H	H	A	A	A	H	B	B	H	H	H	H	A	B	H	B	A	H	H	B	B	A	B	H	A	B	B	H	H	H	H	H	H	B	H	A
	A03	17541441	B	B	H	B	H	B	B	H	H	H	B	H	H	A	A	A	H	B	B	H	H	H	H	A	B	H	B	A	H	H	B	B	A	B	H	A	B	B	H	H	H	H	H	H	B	H	A
	A03	17541466	B	B	H	A	H	A	B	H	H	H	B	H	H	A	A	A	H	B	B	H	H	H	H	A	B	H	B	A	H	H	B	B	A	B	H	A	B	B	H	H	H	H	H	H	B	H	A
	A03	17729678	B	B	H	H	H	H	B	H	H	H	B	H	H	A	A	A	H	B	B	H	H	H	H	A	B	H	B	A	H	H	B	B	H	B	H	A	B	H	H	B	H	H	H	H	B	H	H
	A03	17742565	B	B	H	H	H	H	B	H	H	H	B	H	H	A	A	A	H	B	B	H	H	H	H	A	B	H	B	A	H	H	B	B	H	B	H	A	B	H	H	B	H	H	H	H	B	H	H
	A03	17742903	B	B	H	H	H	H	B	H	H	H	B	H	H	A	A	A	H	B	B	H	H	H	H	A	B	H	B	A	H	H	B	B	H	B	H	A	B	H	H	B	H	H	H	H	B	H	H
	A03	17742924	B	B	H	H	H	H	B	H	H	H	B	H	H	A	A	A	H	B	B	H	H	H	H	A	B	H	B	A	H	H	B	B	H	B	H	A	B	H	H	B	H	H	H	H	B	H	H
	A03	17821747	B	B	H	H	H	H	B	H	H	H	B	H	H	A	H	A	H	B	B	H	H	H	H	A	B	H	B	A	H	H	B	B	H	B	H	A	B	H	H	B	H	H	H	H	B	H	H
	A03	17910355	B	B	H	H	H	H	B	H	H	H	B	H	H	A	A	A	H	B	B	H	H	H	H	A	B	H	B	A	H	H	B	B	H	B	H	A	B	H	H	B	H	H	H	H	B	H	H
	A03	17938802	B	B	H	H	A	H	H	A	A	A	B	A	H	A	A	A	A	H	B	A	A	A	H	A	H	A	B	A	H	H	B	B	A	H	A	A	B	A	A	H	H	H	H	H	B	A	A
	A03	17938841	B	B	H	H	A	A	H	A	A	A	B	A	H	A	A	A	A	H	B	A	A	A	A	A	H	A	B	A	H	H	B	B	A	H	A	A	B	A	A	H	H	H	H	H	B	A	A
	A03	17938852	B	B	H	H	A	A	H	A	A	A	B	A	H	A	A	A	A	H	B	A	A	A	A	A	H	A	B	A	H	H	B	B	A	H	A	A	B	A	A	A	H	H	H	H	B	A	A
	A03	17938863	B	B	H	H	A	A	H	A	A	A	B	A	H	A	A	A	A	H	B	A	A	A	H	A	H	A	B	A	H	H	B	B	A	H	A	A	B	A	A	H	H	H	H	H	B	A	A
	A03	17938867	B	B	H	H	A	A	H	A	A	A	B	A	H	A	A	A	A	H	B	A	A	A	A	A	H	A	B	A	H	H	B	B	A	B	A	A	B	A	A	H	H	H	H	H	B	A	A
	A03	17943864	B	B	H	H	H	H	B	H	H	H	B	H	H	A	A	A	H	B	B	H	H	H	H	A	B	H	B	A	H	H	B	B	H	B	H	A	B	H	H	B	H	H	H	H	B	H	H
	A03	18050843	B	B	H	H	H	H	B	H	H	H	B	H	H	A	A	A	H	H	B	H	H	H	H	A	B	H	B	A	H	H	B	B	H	B	H	A	B	H	H	B	H	H	H	H	B	H	H
	A03	18050884	B	B	H	H	H	H	B	H	H	H	B	H	H	A	A	A	H	H	B	H	H	H	H	A	B	H	B	A	H	H	B	B	H	B	H	A	B	H	H	B	H	H	H	H	B	H	H
	A03	18050885	B	B	H	H	H	H	B	H	H	H	B	H	H	A	A	A	H	H	B	H	H	H	H	A	B	H	B	A	H	H	B	B	H	B	H	A	B	H	H	B	H	H	H	H	B	H	H
	A03	18182848	B	B	H	H	H	H	B	H	H	H	B	H	H	A	A	A	H	H	B	H	H	H	H	A	B	H	B	A	H	H	B	B	H	B	H	A	B	H	H	B	H	H	H	H	B	H	H
	A03	18182863	B	B	H	H	H	H	B	H	H	H	B	H	H	A	A	A	H	H	B	H	H	H	H	A	B	H	B	A	H	H	B	B	H	B	H	A	B	H	H	B	H	H	H	H	B	H	H
	A03	18182893	B	B	H	H	H	H	B	H	H	H	B	H	H	A	A	A	H	H	B	H	H	H	H	A	B	H	B	A	H	H	B	B	H	B	H	A	B	H	H	B	H	H	H	H	B	H	H
	A03	18182896	B	B	H	H	H	H	B	H	H	H	B	H	H	A	A	A	H	H	B	H	H	H	H	A	B	H	B	A	H	H	B	B	H	B	H	A	B	H	H	B	H	H	H	H	B	H	H
	A03	18182899	B	B	H	H	H	H	B	H	H	H	B	H	H	A	A	A	H	H	B	H	H	H	H	A	B	H	B	A	H	H	B	B	H	B	H	A	B	H	H	B	H	H	H	H	B	H	H
	A03	18182905	B	B	H	H	H	H	B	H	H	H	B	H	H	A	A	A	H	H	B	H	H	H	H	A	B	H	B	A	H	H	B	B	H	B	H	A	B	H	H	B	H	H	H	H	B	H	H
	A03	18358896	B	B	H	H	H	H	B	H	H	H	B	H	H	A	A	A	H	H	B	H	H	H	H	H	B	H	B	A	H	H	B	B	H	B	H	A	B	H	H	B	H	H	H	H	B	H	H
	A03	18363194	B	B	H	H	H	H	B	H	H	H	B	H	H	A	A	A	H	H	B	H	H	H	H	A	B	H	B	A	H	B	B	B	H	B	H	A	B	H	B	B	H	H	H	H	B	H	H
	A03	18363199	B	B	H	H	H	H	B	H	H	H	B	H	H	A	A	A	H	H	B	H	H	H	H	A	B	H	B	A	H	B	B	B	H	B	H	A	B	H	B	B	H	H	H	H	B	H	H
	A03	18363499	B	B	H	H	H	H	B	H	H	H	B	H	H	A	A	A	H	H	B	H	H	H	H	A	B	H	B	A	H	B	B	B	H	B	H	A	B	H	B	B	H	H	H	H	B	H	H
	A03	18511421	B	B	H	H	H	H	B	H	H	H	B	H	H	A	A	A	H	H	B	H	H	H	H	A	B	H	B	A	H	H	B	B	A	B	H	A	B	H	H	B	H	H	H	H	B	H	H
	A03	18511434	B	B	H	H	H	H	B	H	H	H	B	H	H	A	A	A	H	H	B	H	H	H	H	A	B	H	B	A	H	H	B	B	A	B	H	A	B	H	H	B	H	H	H	H	B	H	H
	A03	18511454	B	B	A	H	H	H	B	H	H	H	B	H	H	A	A	A	H	H	B	H	H	H	H	A	B	H	B	A	H	H	B	B	A	B	H	A	B	H	H	B	H	H	H	H	B	H	H
	A03	18511736	B	B	H	H	H	H	B	H	H	H	B	H	H	A	A	A	H	H	B	H	H	H	H	A	B	H	B	A	H	H	B	B	A	B	H	A	B	H	H	B	H	H	H	H	B	H	H
	A03	18511762	B	B	H	H	H	H	B	H	H	H	B	H	H	A	A	A	H	H	B	H	H	H	H	A	B	H	B	A	H	H	B	B	A	B	H	A	B	H	H	B	H	H	H	H	B	H	H
	A03	18626645	B	B	H	H	H	H	B	H	H	H	B	H	H	A	A	A	A	H	B	H	H	H	H	H	B	H	B	A	H	H	B	B	H	B	H	A	B	H	H	B	H	H	H	H	B	H	H
	A03	18694359	B	B	H	H	H	H	B	H	H	H	B	H	H	A	A	A	A	H	B	H	A	H	H	H	B	H	B	A	H	H	B	B	H	B	H	A	B	H	H	B	H	H	H	H	B	H	H
	A03	18694379	B	B	H	H	H	H	B	H	H	H	B	H	H	A	A	A	A	H	B	H	A	H	H	H	B	H	B	A	H	H	B	B	H	B	H	A	B	H	H	B	H	H	H	H	B	H	H
	A03	19106366	B	B	H	H	H	H	B	H	H	H	B	H	H	A	H	A	A	H	B	H	A	H	H	H	B	H	B	A	H	H	H	B	H	B	H	A	B	H	H	B	H	H	H	A	B	H	H
	A03	19106397	B	B	H	H	H	H	B	H	H	H	B	H	H	A	H	A	A	H	B	H	A	H	H	H	B	H	B	A	H	H	H	B	H	B	H	A	B	H	H	B	H	H	H	A	B	H	H
	A03	19308495	B	B	H	H	H	H	B	H	H	H	B	H	H	A	H	A	A	H	B	H	A	H	H	H	B	H	B	A	H	H	B	B	H	B	A	A	B	H	H	B	H	H	H	H	B	H	H
	A03	19308500	B	B	H	H	H	H	B	H	H	H	B	H	H	A	H	A	A	H	B	H	A	H	H	H	B	H	B	A	H	H	B	B	H	B	A	A	B	H	H	B	H	H	H	H	B	H	H
	A03	19308510	B	B	H	H	H	H	B	H	H	H	B	H	H	A	H	A	A	H	B	H	A	H	H	H	B	H	B	A	H	H	B	B	H	B	A	A	B	H	H	B	H	H	H	H	B	H	H
	A03	19510682	B	B	H	H	H	H	B	H	H	H	B	H	H	A	H	A	A	H	B	H	A	H	H	H	B	H	B	A	H	H	B	B	H	B	A	A	B	H	H	B	H	H	H	H	B	H	H
	A03	19510693	B	B	H	H	H	H	B	H	H	H	B	H	H	A	H	A	A	H	B	H	A	H	H	H	B	H	B	A	H	H	B	B	H	B	A	A	B	H	H	B	H	H	H	H	B	H	H
	A03	19510899	B	B	H	H	H	H	B	H	H	H	B	H	H	A	H	A	A	H	B	H	A	H	H	H	B	H	B	A	H	H	B	B	H	B	A	A	B	H	H	B	H	H	H	H	B	H	H
	A03	19510902	B	B	H	H	H	H	B	H	H	H	B	H	H	A	H	A	A	H	B	H	A	H	H	H	B	H	B	A	H	H	B	B	H	B	A	A	B	H	H	B	H	H	H	H	B	H	H
	A03	19510905	B	B	H	H	H	H	B	H	H	H	B	H	H	A	H	A	A	H	B	H	A	H	H	H	B	H	B	A	H	H	B	B	H	B	A	A	B	H	H	B	H	H	H	H	B	H	H
	A03	19510908	B	B	H	H	H	H	B	H	H	H	B	H	H	A	H	A	A	H	B	H	A	H	H	H	B	H	B	A	H	H	B	B	H	B	A	A	B	H	H	B	H	H	H	H	B	H	H
	A03	19571995	B	B	H	H	H	H	B	H	H	H	B	B	H	A	H	A	A	H	B	H	A	H	H	H	B	H	B	A	H	H	B	B	H	B	A	A	B	H	H	B	H	H	H	H	B	H	H
	A03	19751364	B	B	H	H	H	H	B	H	H	H	B	H	H	A	H	A	A	H	B	H	H	H	H	H	B	H	B	A	H	H	B	B	H	B	H	A	B	H	H	B	H	H	H	H	B	H	H
	A03	19822782	B	B	H	H	H	H	H	H	H	H	B	H	H	A	H	A	A	H	B	H	H	H	H	H	B	H	B	A	H	H	B	B	H	B	H	A	B	H	H	B	H	H	H	H	B	H	H
	A03	19822963	B	B	H	H	H	H	H	H	H	H	B	H	H	A	H	A	A	H	B	H	H	H	H	H	B	H	B	A	H	H	B	B	H	B	H	A	B	H	H	B	H	H	H	H	B	H	H
	A03	19827480	B	B	H	H	H	H	B	H	H	H	B	H	H	H	H	A	A	H	B	H	A	H	H	H	B	H	B	A	H	H	B	B	H	B	H	A	B	H	H	B	H	H	H	H	B	H	H
	A03	19827488	B	B	H	H	H	H	B	H	H	H	B	H	H	H	H	A	A	H	B	H	A	H	H	H	B	H	B	A	H	H	B	B	H	B	H	A	B	H	H	B	H	H	H	H	B	H	H
	A03	19865621	B	B	H	H	H	H	B	H	B	H	H	H	H	H	H	A	A	H	B	H	A	H	H	H	B	H	B	A	H	H	B	B	B	B	H	A	B	H	H	B	H	H	H	H	B	H	H
	A03	19865656	B	B	H	H	H	H	B	B	B	H	H	H	H	H	H	A	A	H	B	H	A	H	H	H	B	H	B	A	H	H	B	B	B	B	H	A	B	H	H	B	H	H	H	H	B	H	H
	A03	19866007	B	B	A	H	H	H	B	H	A	H	H	H	H	H	H	A	A	H	B	H	A	H	H	H	B	H	B	A	H	H	B	B	A	B	H	A	B	H	H	B	A	A	H	H	B	A	H
	A03	19866015	B	B	H	H	H	H	B	B	B	H	H	H	H	H	H	A	A	H	B	H	A	H	H	H	B	H	B	A	H	H	B	B	B	B	H	A	B	H	H	B	H	B	H	H	B	B	H
	A03	20005104	B	B	H	H	H	H	B	H	H	H	H	H	H	H	H	H	A	H	B	H	A	H	H	H	B	H	B	A	H	H	B	B	H	B	H	A	B	H	H	B	H	H	H	H	B	H	H
	A03	20092170	B	B	H	H	H	H	B	H	H	H	H	H	H	H	H	A	A	H	B	H	A	H	H	H	B	H	B	A	H	H	B	B	H	B	H	A	B	H	H	B	H	H	H	H	B	H	H
	A03	20177550	B	B	H	H	H	H	B	A	H	H	H	H	H	H	H	A	A	H	B	H	A	H	H	H	B	H	B	A	H	H	B	B	H	B	H	A	B	H	H	B	H	H	H	H	B	H	H
	A03	20177573	B	B	H	H	H	H	B	A	H	H	H	H	H	H	H	A	A	H	B	H	A	H	H	H	B	H	B	A	H	H	B	B	H	B	H	A	B	H	H	B	H	H	H	H	B	H	H
	A03	20178080	B	B	H	H	H	H	B	A	H	H	H	H	H	H	H	A	A	H	B	H	A	H	H	H	B	H	B	A	H	H	B	B	H	B	H	A	B	H	H	B	H	H	H	H	B	H	H
	A03	20178082	B	B	H	H	H	H	B	A	H	H	H	H	H	H	H	A	A	H	B	H	A	H	H	H	B	H	B	A	H	H	B	B	H	B	H	A	B	H	H	B	H	H	H	H	B	H	H
	A03	20178224	B	B	H	H	H	H	B	A	H	H	H	H	H	H	H	A	A	H	B	H	A	H	H	H	B	H	B	A	H	H	B	B	H	B	H	A	B	H	H	B	H	H	H	H	B	H	H
	A03	20178320	B	B	H	H	H	H	B	A	H	B	H	H	H	H	H	A	A	H	B	H	A	H	H	H	B	H	B	A	H	H	B	B	H	B	H	A	B	H	H	B	H	H	H	H	B	H	H
	A03	20212852	B	B	H	H	H	H	B	A	H	H	H	H	H	H	H	A	A	H	B	H	A	H	H	H	B	H	B	A	H	H	B	B	H	B	H	A	B	H	H	H	H	H	H	H	B	H	H
	A03	20213189	B	B	H	H	H	H	B	A	H	H	H	H	H	H	H	A	A	H	B	H	A	H	H	H	B	H	B	A	H	H	B	B	H	B	H	A	B	H	H	B	H	H	H	H	B	H	H
	A03	20213243	B	B	H	H	H	H	B	A	H	H	H	H	H	H	H	A	A	H	B	H	A	H	H	H	B	H	B	A	H	H	B	B	H	B	H	A	B	H	H	B	H	H	H	H	B	H	H
	A03	20522588	B	B	H	H	H	H	B	A	H	H	H	H	H	H	H	A	A	H	B	H	H	H	H	H	B	H	B	A	H	H	B	B	H	B	H	A	B	H	H	B	H	H	H	H	B	H	H
	A03	20572606	B	B	H	H	H	H	H	A	H	H	H	H	H	H	H	A	A	H	B	H	A	H	H	H	B	H	B	A	H	H	B	B	H	B	H	A	B	H	H	B	H	H	H	H	B	H	H
	A03	20757339	B	B	H	H	H	H	H	A	H	H	H	H	H	H	H	A	A	H	B	H	A	H	H	H	B	H	B	A	H	H	B	B	H	B	H	A	B	H	H	B	H	H	H	H	B	H	H
	A03	20762132	B	B	H	H	H	H	H	A	H	H	H	H	H	H	H	A	A	H	B	H	A	H	H	H	B	H	B	A	H	H	B	B	H	B	H	A	B	H	H	B	H	H	H	H	B	H	H
	A03	20762170	B	B	H	H	H	H	H	A	H	H	H	H	H	H	H	A	A	H	B	H	A	H	H	H	B	H	B	A	H	H	B	B	H	B	H	A	B	H	H	B	H	H	H	H	B	H	H
	A03	20762172	B	B	H	H	H	H	H	A	H	H	H	H	H	H	H	A	A	H	B	H	A	H	H	H	B	H	B	A	H	H	B	B	H	B	H	A	B	H	H	B	H	H	H	H	B	H	H
	A03	20768809	B	B	H	H	H	H	H	H	H	H	H	H	H	H	B	A	A	H	B	H	A	H	H	B	B	H	B	A	H	H	B	B	B	B	H	A	B	H	B	B	H	H	H	H	B	H	H
	A03	20768812	B	B	H	H	H	H	H	H	H	H	H	H	H	H	B	A	A	H	B	H	A	H	H	B	B	H	B	A	H	H	B	B	B	B	H	A	B	H	B	B	H	H	H	H	B	H	H
	A03	20768814	B	B	H	H	H	H	H	H	H	H	H	H	H	H	B	A	A	H	B	H	A	H	H	B	B	H	B	A	H	H	B	B	B	B	H	A	B	H	B	B	H	H	H	H	B	H	H
	A03	20768843	B	B	H	H	H	H	H	H	H	H	H	H	H	H	B	A	A	H	B	H	A	H	H	B	B	H	B	A	H	H	B	B	B	B	H	A	B	H	B	B	H	H	H	H	B	H	H
	A03	20769217	B	B	H	H	H	H	H	H	H	H	H	H	H	H	B	A	A	H	B	H	A	H	H	B	B	H	B	A	H	H	B	B	B	B	H	A	B	H	B	B	H	H	H	H	B	H	H
	A03	20769249	B	B	H	H	H	H	H	H	H	H	H	H	H	H	B	A	A	H	B	H	A	H	H	B	B	H	B	A	H	H	B	B	B	B	H	A	B	H	B	B	H	H	H	H	B	H	H
	A03	20769285	B	B	H	H	H	H	H	H	H	H	H	H	H	H	B	A	A	H	B	H	A	H	H	B	B	H	B	A	H	H	B	B	B	B	H	A	B	H	B	B	H	H	H	H	B	H	H
	A03	20836990	B	B	H	H	H	H	H	A	H	H	H	H	H	H	H	A	A	H	B	H	A	H	H	H	B	H	B	A	H	H	B	B	H	B	H	A	B	H	H	B	H	H	H	H	B	H	H
	A03	20837038	B	B	H	H	H	H	H	A	H	H	H	H	H	H	H	A	A	H	B	H	A	H	H	H	B	H	B	A	H	H	B	B	H	B	H	A	B	H	H	B	H	H	H	H	B	H	H
	A03	20837071	B	B	H	H	H	H	H	A	H	H	H	H	H	H	H	A	A	H	B	H	A	H	H	H	B	H	B	A	H	H	B	B	H	B	H	A	B	H	H	B	H	H	H	H	B	H	H
	A03	20891882	H	B	H	H	H	H	H	A	H	H	H	H	H	B	H	A	A	H	B	H	A	H	H	H	B	H	B	H	H	H	B	B	H	B	H	A	B	H	H	B	H	H	H	H	B	H	H
	A03	20975415	H	B	H	H	H	H	H	A	H	H	H	H	H	B	H	A	A	H	B	H	A	H	H	H	B	H	B	H	H	H	B	B	H	B	H	A	B	H	H	B	H	H	H	H	B	H	H
	A03	20976801	H	B	H	H	H	H	H	A	H	H	H	H	H	B	H	A	A	H	B	H	A	H	H	H	B	H	B	H	H	H	B	B	H	B	H	A	B	H	H	B	H	H	H	H	B	H	H
	A03	20981125	H	B	H	H	H	H	H	A	H	H	H	H	H	B	H	A	A	H	B	H	A	H	H	H	B	H	B	H	H	H	B	B	H	B	H	A	B	H	H	B	H	H	H	H	B	H	H
	A03	20982007	H	B	H	H	H	H	H	A	H	H	H	H	H	B	H	A	A	H	B	H	H	H	H	H	B	H	B	H	H	H	B	B	H	B	H	A	B	H	H	B	H	H	H	H	B	H	H
	A03	20989886	H	B	H	H	H	H	H	A	H	H	H	H	H	B	H	A	A	H	B	H	A	H	H	H	B	H	B	H	H	H	B	B	H	B	H	A	B	H	H	B	H	H	H	H	B	H	H
	A03	20990068	H	B	H	H	H	H	H	A	H	H	H	H	H	B	H	A	A	H	B	H	A	H	H	H	B	H	B	H	H	H	B	B	H	B	H	A	B	H	H	B	H	H	H	H	B	H	H
	A03	21084143	H	B	H	H	H	H	H	A	H	H	H	H	H	B	H	H	A	H	B	H	A	H	H	H	B	H	B	B	H	H	B	B	H	B	H	A	B	H	H	B	H	H	H	H	B	H	H
	A03	21186151	H	B	H	H	H	H	H	H	H	H	H	H	H	B	H	A	A	H	B	H	H	H	H	H	B	H	B	B	H	H	B	B	H	B	H	A	B	H	H	B	H	H	H	H	B	H	H
	A03	21272576	H	H	H	H	H	H	H	A	H	A	H	H	H	B	H	H	A	H	B	H	H	H	H	H	B	H	B	B	H	H	B	B	H	B	H	A	B	H	H	B	H	H	H	H	B	H	H
	A03	21408381	H	H	H	H	H	H	H	A	H	A	H	H	H	B	H	H	A	H	B	H	H	H	H	H	B	H	H	B	H	H	B	B	H	B	H	A	B	H	H	B	H	H	H	H	B	H	H
	A03	21408387	H	H	H	H	H	H	H	A	H	A	H	H	H	B	H	H	A	H	B	H	H	H	H	H	B	H	H	B	H	H	B	B	H	B	H	A	B	H	H	B	H	H	H	H	B	H	H
	A03	21517142	H	H	H	H	H	H	H	A	H	A	H	H	H	B	H	H	A	H	B	H	H	H	H	H	B	H	H	B	H	H	B	B	H	B	H	A	B	H	H	B	H	H	H	H	B	H	H
	A03	21517154	H	H	H	H	H	H	H	A	H	A	H	H	H	B	H	H	A	H	B	H	H	H	H	H	B	H	H	B	H	H	B	B	H	B	H	A	B	H	H	B	H	H	H	H	B	H	H
	A03	21517188	H	H	H	H	H	H	H	A	H	A	H	H	H	B	H	H	A	H	B	H	H	H	H	H	B	H	H	B	H	H	B	B	H	B	H	A	B	H	H	B	H	H	H	H	B	H	H
	A03	21517380	H	H	H	H	H	H	H	A	H	A	H	H	H	B	H	H	A	H	B	H	H	H	H	H	B	H	H	B	H	H	B	B	H	B	H	A	B	H	H	B	H	H	H	H	B	H	H
	A03	21517417	H	H	H	H	H	H	H	A	H	A	H	H	H	B	H	A	A	H	B	H	A	H	H	H	B	H	H	B	H	H	B	B	H	B	H	A	B	H	H	B	H	H	H	H	B	H	H
	A03	21517419	H	H	H	H	H	H	H	A	H	A	H	H	H	B	H	A	A	H	B	H	A	H	H	H	B	H	H	B	H	H	B	B	H	B	H	A	B	H	H	B	H	H	H	H	B	H	H
	A03	21683087	H	H	H	H	H	H	H	A	H	A	H	H	H	B	H	A	A	H	B	H	A	H	H	H	B	B	H	B	H	H	B	B	H	B	H	A	B	H	H	B	H	H	H	H	B	H	H
	A03	21870046	H	H	H	H	H	H	H	A	A	A	H	H	H	B	H	H	A	H	B	H	H	H	H	H	B	B	H	B	H	H	B	B	H	B	H	A	B	A	H	B	H	H	H	H	B	H	H
	A03	21998676	H	H	H	H	B	H	H	A	A	A	H	H	H	B	H	H	A	H	B	H	H	H	H	H	B	B	H	B	H	H	B	B	H	B	H	A	B	A	H	B	H	H	H	H	B	H	H
	A03	22099346	H	H	H	H	B	H	H	A	A	A	H	H	H	B	H	A	A	H	B	H	A	H	H	H	B	B	H	B	H	H	B	B	H	B	H	A	B	A	H	B	H	H	H	H	B	H	H
	A03	22099476	H	H	H	H	B	H	H	A	A	A	H	H	H	B	H	A	A	H	B	H	A	H	H	H	B	B	H	B	H	H	B	B	H	B	H	A	B	A	H	B	H	H	H	H	B	H	H
	A03	22099523	H	H	H	H	B	H	H	A	A	A	H	H	H	B	H	A	A	H	B	H	A	H	H	H	B	B	H	B	H	H	B	B	H	B	H	A	B	A	H	B	H	H	H	H	B	H	H
	A03	22101051	H	H	H	H	B	H	H	A	A	A	H	H	H	B	H	A	A	H	B	H	H	H	H	H	B	B	H	B	H	H	B	B	H	B	H	A	B	A	H	B	H	H	H	H	B	H	H
	A03	22101057	H	H	H	H	B	H	H	A	A	A	H	H	H	B	H	A	A	H	B	H	H	H	H	H	B	B	H	B	H	H	B	B	H	B	H	A	B	A	H	B	H	H	H	H	B	H	H
	A03	22280398	H	H	H	H	B	H	H	A	A	A	H	H	H	B	H	A	A	H	B	B	H	H	H	H	B	B	H	B	H	H	B	B	H	B	H	A	B	A	H	B	H	H	B	H	B	H	H
	A03	22280402	H	H	H	H	B	H	H	A	A	A	H	H	H	B	H	A	A	H	B	B	H	H	H	H	B	B	H	B	H	H	B	B	H	B	H	A	B	A	H	B	H	H	B	H	B	H	H
	A03	22559419	H	H	H	H	B	H	H	A	A	H	H	H	H	B	H	A	A	H	B	H	A	H	H	H	B	B	A	B	H	H	B	B	H	B	H	A	B	A	H	B	H	H	H	H	B	H	H
	A03	22559447	H	H	H	H	B	H	H	A	A	H	H	H	H	B	H	A	A	H	B	H	A	H	H	H	B	B	A	B	H	H	B	B	H	B	H	A	B	A	H	B	H	H	H	H	B	H	H
	A03	22559455	H	H	H	H	B	H	H	A	A	H	H	H	H	B	H	A	A	H	B	H	A	H	H	H	B	B	A	B	H	H	B	B	H	B	H	A	B	A	H	B	H	H	H	H	B	H	H
	A03	22559541	H	H	H	H	B	H	H	A	A	H	H	H	H	B	H	A	A	H	B	H	A	H	H	H	B	B	A	B	H	H	B	B	H	B	H	A	B	A	H	B	H	H	H	H	B	H	H
	A03	22679035	H	H	H	H	B	A	H	A	H	H	H	H	H	B	H	A	A	H	B	H	A	H	H	H	B	B	A	B	H	H	B	B	H	B	H	A	B	A	H	B	H	H	H	H	B	H	H
	A03	22679060	H	H	H	H	B	A	H	A	H	H	H	H	H	B	H	A	A	H	B	H	A	H	H	H	B	B	A	B	H	H	B	B	H	B	H	A	B	A	H	B	H	H	H	H	B	H	H
	A03	22806391	H	H	H	H	B	H	H	A	H	H	H	H	H	B	H	A	A	H	B	H	A	H	H	H	B	B	A	B	H	H	B	B	H	B	H	A	B	A	H	B	H	H	H	H	B	H	H
	A03	22806411	H	H	H	H	B	H	H	A	H	H	H	H	H	B	H	A	A	H	B	H	A	H	H	H	B	B	A	B	H	H	B	B	H	B	H	A	B	A	H	B	H	H	H	H	B	H	H
	A03	22962136	H	H	H	H	B	H	H	H	H	H	H	H	H	B	H	A	A	H	B	H	A	H	H	H	B	B	A	B	H	H	B	B	H	B	H	A	B	A	H	B	H	H	H	H	B	H	H
	A03	22991692	H	H	H	H	B	H	H	A	H	H	H	H	H	B	H	A	A	H	B	H	A	H	H	H	B	B	A	B	H	H	B	B	H	B	H	A	B	A	H	B	H	H	H	H	B	H	H
	A03	22991735	H	H	H	H	B	H	H	A	H	H	H	H	H	B	H	A	A	H	B	H	A	H	H	H	B	B	A	B	H	H	B	B	H	B	H	A	B	A	H	B	H	H	H	H	B	H	H
	A03	23012904	H	H	H	H	B	H	H	A	H	H	H	H	H	B	H	A	A	H	B	H	A	H	H	H	B	B	A	B	H	H	B	B	H	B	H	A	B	A	H	B	H	H	H	H	B	H	H
	A03	23013057	H	H	H	H	B	H	H	A	H	H	H	H	H	B	H	A	A	H	B	H	A	H	H	H	B	B	A	B	H	H	B	B	H	B	H	A	B	A	H	B	H	H	H	H	B	H	H
	A03	23048669	A	H	H	A	B	A	A	A	A	H	A	H	H	B	A	A	A	H	B	H	A	H	A	A	B	B	A	B	H	A	B	B	A	B	H	A	B	A	H	B	H	H	A	H	B	A	A
	A03	23048739	A	H	H	A	B	H	A	A	A	A	A	A	A	A	A	A	A	H	B	A	A	A	A	A	B	B	A	B	H	A	B	B	A	B	A	A	A	A	H	A	A	H	A	H	B	A	A
	A03	23174062	H	H	H	H	B	H	H	A	H	H	H	H	H	B	H	A	A	H	B	H	A	H	H	H	B	B	A	B	H	H	B	B	H	B	H	A	B	A	H	B	H	H	H	H	B	H	H
	A03	23174110	H	H	H	H	B	H	H	A	H	H	H	H	H	B	H	A	A	H	B	H	A	H	H	H	B	B	A	B	H	H	B	B	H	B	H	A	B	A	H	B	H	H	H	H	B	H	H
	A03	23174137	H	H	H	H	B	H	H	A	H	H	H	H	H	B	H	A	A	H	B	H	A	H	H	H	B	B	A	B	H	H	B	B	H	B	H	A	B	A	H	B	H	H	H	H	B	H	H
	A03	23174140	H	H	H	H	B	H	H	A	H	H	H	H	H	B	H	A	A	H	B	H	A	H	H	H	B	B	A	B	H	H	B	B	H	B	H	A	B	A	H	B	H	H	H	H	B	H	H
	A03	23283483	H	H	H	H	B	H	H	A	H	H	H	H	H	B	B	A	A	H	B	H	H	H	H	H	B	B	A	B	H	H	B	B	H	B	H	A	B	A	H	B	H	H	H	H	B	H	H
	A03	23283500	H	H	H	H	B	H	H	A	H	H	H	H	H	B	B	A	A	H	B	H	H	H	H	H	B	B	A	B	H	H	B	B	H	B	H	A	B	A	H	B	H	H	H	H	B	H	H
	A03	23283523	H	H	H	H	B	H	H	A	H	H	H	H	H	B	B	A	A	H	B	H	H	H	H	H	B	B	A	B	H	H	B	B	H	B	H	A	B	A	H	B	H	H	H	H	B	H	H
	A03	23283639	H	H	H	H	B	H	H	A	H	H	H	H	H	B	B	A	A	H	B	H	H	H	H	H	B	B	A	B	H	H	B	B	H	B	H	A	B	A	H	B	H	H	H	H	B	H	H
	A03	23283685	H	H	H	H	B	H	H	A	H	H	H	H	H	B	B	A	A	H	B	H	H	H	H	H	B	B	A	B	H	H	B	B	H	B	H	A	B	A	H	B	H	H	H	H	B	H	H
	A03	23298183	H	H	H	H	B	H	H	A	H	H	H	H	H	B	B	A	A	H	B	H	H	H	H	H	B	B	A	B	H	H	B	B	H	B	H	A	B	A	H	B	H	H	H	H	B	H	H
	A03	23298187	H	H	H	H	B	H	H	A	H	H	H	H	H	B	B	A	A	H	B	H	H	H	H	H	B	B	A	B	H	H	B	B	H	B	H	A	B	A	H	B	H	H	H	H	B	H	H
	A03	23298362	H	H	H	H	B	H	H	A	H	H	H	H	H	B	B	A	A	H	B	H	H	H	H	H	B	B	A	B	H	H	B	B	H	B	H	A	B	A	H	B	H	H	H	H	B	H	H
	A03	23351686	H	H	H	H	B	H	H	A	H	H	H	H	H	B	B	A	A	H	B	H	H	H	H	H	B	B	A	B	H	H	B	B	H	B	H	A	B	A	H	B	H	H	H	H	B	H	H
	A03	23351697	H	H	H	H	B	H	H	A	H	H	H	H	H	B	B	A	A	H	B	H	H	H	H	H	B	B	A	B	H	H	B	B	H	B	H	A	B	A	H	B	H	H	H	H	B	H	H
	A03	23535007	H	H	H	H	B	H	H	A	H	H	H	H	H	B	B	A	A	H	B	H	A	H	H	H	B	B	A	B	H	H	B	B	H	B	H	A	B	A	H	B	H	H	H	H	B	H	H
	A03	23603849	H	H	H	H	B	H	H	A	H	H	H	H	H	B	B	A	A	H	B	H	A	H	H	H	B	B	A	B	H	H	B	B	H	B	H	A	B	A	H	B	H	H	H	H	B	H	H
	A03	23979431	B	H	H	H	B	H	H	A	H	H	H	H	H	B	B	A	A	H	B	H	H	H	H	H	B	B	A	B	H	H	B	B	H	B	H	A	B	A	H	B	H	H	H	H	B	H	H
	A03	23979453	B	H	H	H	B	H	H	A	H	H	H	H	H	B	B	A	A	H	B	H	H	H	H	H	B	B	A	B	H	H	B	B	H	B	H	A	B	A	H	B	H	H	H	H	B	H	H
	A03	23979457	B	H	H	H	B	H	H	A	H	H	H	H	H	B	B	A	A	H	B	H	H	H	H	H	B	B	A	B	H	H	B	B	H	B	H	A	B	A	H	B	H	H	H	H	B	H	H
	A03	24623358	B	H	H	H	B	A	H	A	H	H	H	H	H	B	B	A	A	H	B	H	A	H	H	H	B	B	A	B	H	H	B	B	H	B	H	H	B	A	H	B	H	H	H	H	B	H	H
	A03	24623363	B	H	H	H	B	A	H	A	H	H	H	H	H	B	B	A	A	H	B	H	A	H	H	H	B	B	A	B	H	H	B	B	H	B	H	H	B	A	H	B	H	H	H	H	B	H	H
	A03	24993345	B	H	H	H	B	H	H	A	H	A	H	H	H	B	B	A	A	B	B	H	A	H	H	H	B	B	A	B	H	H	B	B	H	B	H	H	B	A	A	B	H	H	A	H	B	H	H
	A03	24993361	B	H	H	H	B	H	H	A	H	A	H	H	H	H	B	A	A	B	B	H	A	H	A	H	B	B	A	B	H	H	B	B	H	B	H	H	B	A	A	B	H	H	A	H	B	H	H
	A03	25086449	B	H	H	H	B	H	H	A	H	H	H	H	H	B	B	A	A	H	B	H	A	H	H	B	B	B	A	B	H	H	B	B	H	B	H	H	B	A	H	B	H	H	A	H	B	H	H
	A03	25086477	B	H	H	H	B	H	H	A	H	H	H	H	H	B	B	A	A	H	B	H	A	H	H	B	B	B	A	B	H	H	B	B	H	B	H	H	B	A	H	B	H	H	A	H	B	H	H
	A03	25104302	B	H	H	H	B	H	H	A	H	H	H	H	H	B	B	A	A	H	B	H	A	H	H	H	B	B	A	B	H	H	B	B	H	B	H	H	B	A	H	B	H	H	A	H	B	H	H
	A03	25104303	B	H	H	H	B	H	H	A	H	H	H	H	H	B	B	A	A	H	B	H	A	H	H	H	B	B	A	B	H	H	B	B	H	B	H	H	B	A	H	B	H	H	A	H	B	H	H
	A03	25104304	B	H	H	H	B	H	H	A	H	H	H	H	H	B	B	A	A	H	B	H	A	H	H	H	B	B	A	B	H	H	B	B	H	B	H	H	B	A	H	B	H	H	A	H	B	H	H
	A03	25122192	B	H	H	H	B	H	H	A	B	B	B	H	H	B	B	A	A	H	B	H	H	H	H	H	B	B	A	B	B	H	B	B	B	B	H	H	B	A	B	B	B	H	A	H	B	B	B
	A03	25122207	B	H	H	H	B	H	H	A	H	H	H	H	H	B	B	A	A	H	B	H	A	H	H	H	B	B	A	B	H	H	B	B	H	B	H	H	B	A	H	B	H	H	A	H	B	H	H
	A03	27000955	B	A	H	H	B	H	H	A	H	H	H	A	B	B	H	A	A	H	B	B	A	H	H	H	B	B	A	B	H	H	H	B	H	B	H	H	B	A	H	B	H	H	A	H	B	H	H
	A03	27000986	B	A	H	H	B	H	H	A	H	H	H	A	B	B	B	A	A	H	B	B	A	H	H	H	B	B	A	B	H	H	H	B	H	B	H	H	B	A	H	B	H	H	A	H	B	H	H
	A03	27001007	B	A	H	H	B	H	H	A	H	H	H	A	B	B	B	A	A	H	B	B	A	H	H	H	B	B	A	B	H	H	H	B	H	B	H	H	B	A	H	B	H	H	A	H	B	H	H
	A03	27001009	B	A	H	H	B	H	H	A	H	H	H	A	B	B	B	A	A	H	B	B	A	H	H	H	B	B	A	B	H	H	H	B	H	B	H	H	B	A	H	B	H	H	A	H	B	H	H
	A03	27001013	B	A	H	H	B	H	H	A	H	H	H	A	B	B	B	A	A	H	B	B	A	H	H	H	B	B	A	B	H	H	H	B	H	B	H	H	B	A	H	B	H	H	A	H	B	H	H
	A03	27544919	B	A	H	H	B	H	H	A	H	H	H	A	B	B	B	A	A	H	B	H	A	H	H	H	B	B	A	B	H	H	H	B	H	B	H	H	B	A	H	B	H	H	A	H	B	H	H
	A03	28200620	B	A	H	H	B	H	H	A	H	H	H	A	B	B	B	A	A	H	B	H	A	H	H	H	B	B	A	B	H	H	H	B	H	H	H	H	B	A	H	H	H	H	A	H	B	H	H
	A03	28200640	B	A	H	H	B	H	H	A	H	H	H	A	B	B	B	A	A	H	B	H	H	H	H	H	B	B	A	B	H	H	H	B	H	H	H	H	B	A	H	B	H	H	A	H	B	H	H
	A03	28200933	B	A	H	H	B	H	H	A	H	H	H	A	B	B	B	A	A	H	B	H	A	H	H	H	B	B	A	B	H	H	H	B	H	H	H	H	B	A	H	H	H	H	A	H	B	H	H
	A03	28361753	B	A	H	H	B	H	H	A	H	H	H	A	B	B	B	A	A	H	B	H	H	H	H	H	B	B	A	B	H	H	H	B	H	H	H	H	B	A	H	B	H	H	A	H	B	H	H
	A03	28361754	B	A	H	H	B	H	H	A	H	H	H	A	B	B	B	A	A	H	B	H	H	H	H	H	B	B	A	B	H	H	H	B	H	H	H	H	B	A	H	B	H	H	A	H	B	H	H
	A03	28361757	B	A	H	H	B	H	H	A	H	H	H	A	B	B	B	A	A	H	B	H	H	H	H	H	B	B	A	B	H	H	H	B	H	H	H	H	B	A	H	B	H	H	A	H	B	H	H
	A03	28403093	B	A	H	H	B	H	H	A	H	H	H	A	B	B	B	A	A	H	B	H	A	H	H	H	B	B	A	B	H	H	H	B	H	H	H	H	B	A	H	B	H	H	A	H	B	H	H
	A03	28468151	B	A	H	H	B	H	H	A	H	H	H	A	B	B	B	A	A	H	B	H	A	H	H	H	B	B	A	B	H	H	H	B	H	H	H	H	B	A	H	B	H	H	A	H	B	H	H
	A03	28740906	B	A	H	H	B	H	H	A	H	H	H	A	B	B	B	A	A	H	B	H	H	H	H	H	B	B	A	B	H	H	H	B	H	H	H	H	B	A	H	B	H	H	A	H	B	H	H
	A03	28740907	B	A	H	H	B	H	H	A	H	H	H	A	B	B	B	A	A	H	B	H	H	H	H	H	B	B	A	B	H	H	H	B	H	H	H	H	B	A	H	B	H	H	A	H	B	H	H
	A03	28740908	B	A	H	H	B	H	H	A	H	H	H	A	B	B	B	A	A	H	B	H	H	H	H	H	B	B	A	B	H	H	H	B	H	H	H	H	B	A	H	B	H	H	A	H	B	H	H
	A03	28863509	H	A	B	H	H	H	H	A	H	A	H	A	H	H	B	A	A	H	H	H	A	B	H	H	H	H	A	H	H	H	H	B	H	H	B	H	H	A	H	B	B	H	A	H	H	H	B
	A03	28929262	B	A	H	H	B	H	H	A	H	H	H	A	B	B	B	A	A	H	B	H	A	H	H	H	B	B	A	B	H	H	H	B	H	H	H	H	B	A	H	B	H	H	A	H	B	H	H
	A03	29037571	B	A	H	H	B	H	H	A	H	H	H	H	B	B	B	A	H	H	B	H	H	H	H	H	B	B	A	B	H	H	H	B	H	H	H	H	B	H	H	B	H	H	A	H	B	H	H
	A03	29460213	B	A	H	H	B	H	H	A	H	H	H	A	B	B	B	A	A	H	B	H	H	H	H	H	B	B	A	B	H	H	H	B	H	H	H	H	B	A	H	B	H	H	A	H	B	H	H
	A03	29733540	B	A	H	H	B	H	H	A	H	H	H	A	B	B	B	A	A	H	B	H	H	H	H	H	B	B	A	B	H	H	H	B	H	H	H	H	B	A	H	B	H	H	A	H	B	H	H
	A03	29733577	B	A	H	H	B	H	H	A	H	H	H	A	B	B	B	A	A	H	B	H	H	H	H	H	B	B	A	B	H	H	H	B	H	H	H	H	B	A	H	B	H	H	A	H	B	H	H
	A03	29733591	B	A	H	H	B	H	H	A	H	H	H	A	B	B	B	A	A	H	B	H	H	H	H	H	B	B	A	B	H	H	H	B	H	H	H	H	B	A	H	B	H	H	A	H	B	H	H
	A03	29733638	B	A	H	H	B	H	H	A	H	H	H	A	B	B	B	A	A	H	B	H	H	H	H	H	B	B	A	B	H	H	H	B	H	H	H	H	B	A	H	B	H	H	A	H	B	H	H
	A03	29733670	B	A	H	H	B	H	H	A	H	H	H	A	B	B	B	A	A	H	B	H	H	H	H	H	B	B	A	B	H	H	H	B	H	H	H	H	B	A	H	B	H	H	A	H	B	H	H
	A03	29733715	B	A	H	H	B	H	H	A	H	H	H	A	B	B	B	A	A	H	B	H	H	H	H	H	B	B	A	B	H	H	H	B	H	H	H	H	B	A	H	B	H	H	A	H	B	H	H
	A03	29978158	B	A	H	H	B	H	H	A	H	H	H	A	B	B	B	A	A	H	B	H	A	H	H	H	B	B	A	B	H	H	H	B	H	H	H	H	B	A	H	B	H	H	A	H	B	H	H
	A03	29978192	B	A	H	H	B	H	H	A	H	H	H	A	B	B	B	A	A	H	B	H	A	H	H	H	B	B	A	B	H	H	H	B	H	H	H	H	B	A	H	B	H	H	A	H	B	H	H
	A03	29990785	B	A	H	H	B	H	H	A	H	H	H	A	B	B	B	A	A	H	B	H	A	H	H	H	B	B	A	B	H	H	H	B	H	H	H	H	B	A	H	B	H	H	A	H	B	H	H
	A03	29990836	B	A	H	H	B	H	H	A	H	H	H	A	B	B	B	A	A	H	B	H	A	H	H	H	B	B	A	B	H	H	H	B	H	H	H	H	B	A	H	B	H	H	A	H	B	H	H
	A03	29991282	B	A	H	H	B	H	H	A	H	H	H	A	B	B	B	A	A	H	B	H	A	H	H	H	B	B	A	B	H	H	H	B	H	H	H	H	B	A	H	B	H	H	A	H	B	H	H
	A03	30388933	B	A	H	H	B	H	H	A	H	H	H	A	B	B	B	A	A	H	B	H	A	H	H	H	B	B	A	B	H	H	H	B	H	H	H	H	B	A	H	B	H	H	A	H	B	H	H
	A03	30389125	B	A	H	H	B	H	H	A	H	H	H	A	B	B	B	A	A	H	B	H	A	H	H	H	B	B	A	B	H	H	H	B	H	H	H	H	B	A	H	B	H	H	A	H	B	H	H
	A03	30465274	B	A	H	H	B	H	H	A	H	H	H	A	B	B	B	A	A	H	B	H	A	H	H	H	B	B	A	B	H	H	H	B	H	H	H	H	B	A	H	B	H	H	A	H	B	H	H
	A03	30465343	B	A	H	H	B	H	H	H	H	H	H	A	B	B	B	A	A	H	B	H	A	H	H	H	B	B	A	B	H	H	H	B	H	H	H	H	B	A	H	B	H	H	H	H	B	H	H
	A03	30465495	B	A	H	H	B	H	H	A	H	H	H	A	B	B	B	A	A	H	B	H	A	H	H	H	B	B	A	B	H	H	H	B	H	H	H	H	B	A	H	B	H	H	A	H	B	H	H
	A03	30540027	B	A	H	H	B	H	H	A	H	H	H	A	B	B	H	A	A	H	B	H	A	H	A	H	B	B	A	B	H	H	H	H	A	H	H	A	B	A	A	B	H	H	A	H	B	H	H
	A03	30540305	B	A	A	H	B	A	A	A	H	H	H	A	B	B	H	A	A	H	B	H	A	H	A	H	B	B	A	B	A	H	H	H	A	H	H	A	B	A	A	B	H	A	A	H	B	H	H
	A03	30973143	B	A	H	H	B	H	H	A	H	H	H	A	B	B	B	A	A	H	B	H	A	H	A	H	B	B	A	B	H	H	H	B	H	H	H	H	H	A	H	B	H	H	A	H	B	H	H
	A03	31091496	B	A	B	H	B	H	H	A	B	H	H	A	B	B	B	A	A	H	B	B	A	H	H	H	B	B	A	B	B	H	H	B	B	H	H	H	B	B	H	B	H	H	A	H	B	H	B
	A03	31139496	H	A	H	H	H	H	H	A	H	H	H	A	H	H	H	H	A	A	H	H	A	H	A	H	H	H	A	H	H	H	H	H	H	A	H	H	H	A	H	H	B	H	A	H	H	H	H
	A03	31139579	H	A	H	H	H	H	H	A	H	H	H	A	H	H	H	H	A	A	H	H	A	H	H	H	H	H	A	H	H	H	H	H	H	A	H	H	H	A	H	H	B	H	A	H	H	H	H
	A03	31139605	B	A	H	H	H	H	H	B	H	H	H	H	H	H	H	H	B	H	H	B	B	H	H	H	B	B	A	B	H	H	B	B	H	H	H	H	B	A	H	H	B	H	H	H	B	H	B
	A03	31227350	B	A	H	H	B	H	H	A	H	H	H	A	B	B	B	A	A	H	B	H	A	H	H	H	B	B	A	B	H	H	H	B	H	H	H	H	B	A	H	H	H	H	A	H	B	H	H
	A03	31437678	B	A	H	H	B	H	H	A	H	H	H	A	B	B	B	H	A	H	B	H	A	H	H	H	B	B	A	B	H	H	H	B	H	H	H	H	B	A	H	B	H	H	A	H	B	H	H
	A03	31437722	B	A	H	H	B	H	H	A	H	H	H	A	B	B	B	H	A	H	B	H	A	H	H	H	B	B	A	B	H	H	H	B	H	H	H	H	B	A	H	B	H	H	A	H	B	H	H
	A03	31437766	B	A	H	H	B	H	H	A	H	H	H	A	B	B	B	A	A	H	B	H	A	H	H	H	B	B	A	B	H	H	H	B	H	H	H	H	H	A	H	B	H	H	A	H	B	H	H
	A03	31437827	B	A	H	H	B	H	H	A	H	H	H	A	B	B	B	A	A	H	B	H	A	H	H	H	B	B	A	B	H	H	H	B	H	H	H	H	H	A	H	B	H	H	A	H	B	H	H
	A03	31444800	B	A	H	H	B	H	H	A	H	H	H	A	B	B	B	A	A	H	B	H	A	H	H	H	B	B	A	B	H	H	H	B	H	H	H	H	B	A	H	B	H	H	A	H	B	H	H
	A03	31516179	B	A	H	H	B	H	H	A	H	H	A	A	B	B	H	A	A	H	B	H	A	A	H	H	B	B	A	B	H	H	H	B	H	H	H	H	B	A	H	B	H	H	A	H	B	H	H
	A03	31516379	B	A	H	H	B	H	H	A	H	H	H	A	B	B	H	A	A	H	B	H	A	A	H	H	B	B	A	B	H	H	H	B	H	H	H	H	B	A	H	B	H	H	A	H	B	H	H
	A03	31516389	B	A	H	H	B	H	H	A	H	H	H	A	B	B	H	A	A	H	B	H	A	A	H	H	B	B	A	B	H	H	H	B	H	H	H	H	B	A	H	B	H	H	A	H	B	H	H
	A03	31516391	B	A	H	H	B	H	H	A	H	H	H	A	B	B	H	A	A	H	B	H	A	A	H	H	B	B	A	B	H	H	H	B	H	H	H	H	B	A	H	B	H	H	A	H	B	H	H
	A03	31598872	B	A	H	H	B	H	H	A	H	H	H	A	B	B	B	A	A	A	B	H	A	H	H	H	B	B	A	B	A	H	H	B	H	H	H	H	B	A	H	B	H	H	A	H	B	H	H
	A03	31598888	B	A	H	H	B	H	H	A	H	H	H	A	B	B	B	A	A	A	B	H	A	H	H	H	B	B	A	B	A	H	H	B	H	H	H	H	B	A	H	B	H	H	A	H	B	H	H
	A03	31598926	B	A	H	H	B	H	H	A	H	H	H	A	B	B	B	A	A	A	B	H	A	H	H	H	B	B	A	B	A	H	H	B	H	H	H	H	B	A	H	B	H	H	A	H	B	H	H
	A03	31598944	B	A	H	H	B	H	H	A	H	H	H	A	B	B	B	A	A	A	B	H	A	H	H	H	B	B	A	B	A	H	H	B	H	H	H	H	B	A	H	B	H	H	A	H	B	H	H
	A03	31599273	B	A	H	H	B	H	H	A	H	H	H	A	B	B	B	A	A	A	B	H	A	H	H	H	B	B	A	B	A	H	H	B	H	H	H	H	B	A	H	B	H	H	A	H	B	H	H
	A03	31599275	B	A	H	H	B	H	H	A	H	H	H	A	B	B	B	A	A	A	B	H	A	H	H	H	B	B	A	B	A	H	H	B	H	H	H	H	B	A	H	B	H	H	A	H	B	H	H
	A03	31599335	B	A	H	H	B	H	H	A	H	H	H	A	B	B	B	A	A	A	B	H	A	H	H	H	B	B	A	B	A	H	H	B	H	H	H	H	B	A	H	B	H	H	A	H	B	H	H
	A04	1032300	H	B	H	B	H	B	B	A	B	B	H	B	A	H	B	H	B	H	H	A	B	H	H	H	H	H	A	H	B	B	H	B	H	H	H	H	A	B	H	A	A	B	H	A	B	H	H
	A04	1061919	H	B	H	B	H	B	B	A	B	B	H	B	A	H	B	H	B	H	H	A	B	H	H	H	H	H	A	H	B	B	H	B	H	H	H	H	A	B	H	A	A	B	H	A	B	H	H
	A04	1068480	H	B	H	B	H	B	B	A	B	B	H	B	A	H	B	H	B	H	H	A	B	H	H	H	H	H	A	H	B	B	H	B	H	H	H	H	A	B	H	A	A	B	H	A	B	H	H
	A04	1080440	H	B	H	B	H	B	B	A	B	B	H	B	A	H	B	H	B	H	H	A	B	H	H	H	H	H	A	H	B	H	H	B	H	H	H	H	A	B	H	A	A	B	H	A	B	H	H
	A04	1080499	H	B	H	B	H	B	B	A	B	B	H	B	A	H	B	H	B	H	H	A	B	H	H	H	H	H	A	H	B	H	H	B	H	H	H	H	A	B	H	A	A	B	H	A	B	H	H
	A04	1181182	H	B	H	B	H	B	B	A	B	B	H	B	A	H	B	H	B	H	H	A	B	H	H	H	H	H	A	H	H	B	H	B	H	H	H	H	A	B	H	A	A	B	H	A	B	H	H
	A04	1181185	H	B	H	B	H	B	B	A	B	B	H	B	A	H	B	H	B	H	H	A	B	H	H	H	H	H	A	H	H	B	H	B	H	H	H	H	A	B	H	A	A	B	H	A	B	H	H
	A04	1181188	H	B	H	B	H	B	B	A	B	B	H	B	A	H	B	H	B	H	H	A	B	H	H	H	H	H	A	H	H	B	H	B	H	H	H	H	A	B	H	A	A	B	H	A	B	H	H
	A04	1181191	H	B	H	B	H	B	B	A	B	B	H	B	A	H	B	H	B	H	H	A	B	H	H	H	H	H	A	H	H	B	H	B	H	H	H	H	A	B	H	A	A	B	H	A	B	H	H
	A04	1181194	H	B	H	B	H	B	B	A	B	B	H	B	A	H	B	H	B	H	H	A	B	H	H	H	H	H	A	H	H	B	H	B	H	H	H	H	A	B	H	A	A	B	H	A	B	H	H
	A04	1181215	H	B	H	B	H	B	B	A	B	B	H	B	A	H	B	H	B	H	H	A	B	H	H	H	H	H	A	H	H	B	H	B	H	H	H	H	A	B	H	A	A	B	H	A	B	H	H
	A04	1181224	H	B	H	B	H	B	B	A	B	B	H	B	A	H	B	H	B	H	H	A	B	H	H	H	H	H	A	H	H	B	H	B	H	H	H	H	A	B	H	A	A	B	H	A	B	H	H
	A04	1206017	H	B	H	B	H	B	B	A	B	B	H	B	A	H	B	H	B	H	H	A	B	H	H	H	H	H	A	A	H	B	H	B	H	H	H	A	A	B	H	A	A	B	H	A	B	H	H
	A04	1206067	H	B	H	B	H	B	B	A	B	B	H	B	A	H	B	H	B	H	H	A	B	H	H	H	H	H	A	A	H	B	H	B	H	H	H	A	A	B	H	A	A	B	H	A	B	H	H
	A04	1206076	H	B	H	B	H	B	B	A	B	B	H	B	A	H	B	H	B	H	H	A	B	H	H	H	H	H	A	A	H	B	H	B	H	H	H	A	A	B	H	A	A	B	H	A	B	H	H
	A04	1206086	H	B	H	B	H	B	B	A	B	B	H	B	A	H	B	H	B	H	H	A	B	H	H	H	H	H	A	A	H	B	H	B	H	H	H	A	A	B	H	A	A	B	H	A	B	H	H
	A04	1311586	H	B	B	B	H	B	B	A	B	B	H	B	A	H	B	H	B	H	H	A	B	H	H	H	H	H	A	H	H	B	H	B	H	H	H	H	A	H	H	A	A	B	H	A	B	H	H
	A04	1311824	H	B	B	B	H	B	B	A	B	B	H	B	A	H	H	H	B	H	H	A	B	H	H	H	H	H	A	H	H	B	H	B	H	H	H	H	A	H	H	A	A	B	H	A	B	H	H
	A04	1311829	H	B	B	B	H	B	B	A	B	B	H	B	A	H	H	H	B	H	H	A	B	H	H	H	H	H	A	H	H	B	H	B	H	H	H	H	A	H	H	A	A	B	H	A	B	H	H
	A04	1362776	H	B	B	B	H	B	B	A	B	B	H	B	A	H	B	H	B	H	H	A	B	H	H	H	H	H	A	H	H	B	H	B	H	H	H	H	A	B	H	A	A	B	H	A	B	H	H
	A04	1584397	H	B	B	B	H	B	B	A	B	B	H	B	A	H	B	H	B	H	H	A	B	H	H	H	H	H	A	H	H	B	H	B	H	H	H	H	A	B	H	A	A	B	H	A	B	H	H
	A04	1584409	H	B	B	B	H	B	B	A	B	B	H	B	A	H	B	H	B	H	H	A	B	H	H	H	H	H	A	H	H	B	H	B	H	H	H	H	A	B	H	A	A	B	H	A	B	H	H
	A04	1584497	H	B	B	B	H	B	B	A	B	B	H	B	A	H	B	H	B	H	H	A	B	H	H	H	H	H	A	H	H	B	H	B	H	H	H	H	A	B	H	A	A	B	H	A	B	H	H
	A04	1679308	H	B	B	B	H	B	B	A	B	B	H	B	A	H	B	H	B	H	H	A	B	H	H	H	H	H	A	H	H	B	H	B	H	H	H	H	A	B	H	A	A	B	H	A	B	H	H
	A04	2147359	H	B	B	B	H	B	B	A	B	B	H	B	A	B	B	H	B	H	B	A	B	H	H	H	H	H	A	H	H	B	H	B	H	H	H	H	A	B	H	A	A	B	H	A	B	H	H
	A04	2401107	H	B	B	B	H	B	H	A	B	B	H	B	A	B	H	H	B	A	B	A	H	A	A	H	H	H	A	H	H	B	H	B	H	H	H	H	H	B	H	A	A	B	H	A	B	H	H
	A04	2401152	H	B	B	B	H	B	H	A	B	B	H	B	A	B	B	H	B	A	B	A	H	A	A	H	H	H	A	H	H	B	H	B	H	H	H	H	H	B	H	A	A	B	H	A	B	H	H
	A04	2401213	H	B	B	B	H	B	H	A	B	B	H	B	A	B	H	H	B	A	B	A	H	A	A	H	H	H	A	H	H	B	H	B	H	H	H	H	H	B	H	A	A	B	H	A	B	H	H
	A04	2546339	H	B	B	B	H	B	B	A	B	B	H	B	A	B	B	H	B	H	B	A	B	H	A	H	H	H	A	H	H	B	H	B	H	H	H	H	H	B	H	A	A	B	H	A	B	H	H
	A04	2788509	H	B	B	B	H	H	B	A	B	B	H	B	A	B	B	H	B	H	B	A	B	H	A	H	H	H	A	H	H	B	H	B	H	H	H	H	H	B	H	A	A	B	H	A	B	H	H
	A04	3237252	B	B	B	B	H	B	B	A	B	B	B	B	A	B	B	B	B	B	B	A	B	B	B	B	B	B	A	B	B	B	B	B	B	A	B	B	B	B	B	A	A	B	B	A	B	H	B
	A04	3237452	H	B	B	B	H	H	B	H	B	B	H	B	A	H	B	H	B	H	B	A	B	H	A	H	H	H	A	H	H	B	H	B	H	H	H	H	H	B	H	A	A	B	H	A	B	H	H
	A04	3253764	H	B	B	B	H	H	B	A	B	B	H	B	A	B	B	H	B	H	B	A	B	H	A	H	H	H	A	H	H	B	H	B	H	H	H	H	H	B	H	A	A	B	H	A	B	H	H
	A04	3253779	H	B	B	B	H	H	B	A	B	B	H	B	A	B	B	H	B	H	B	A	B	H	A	H	H	H	A	H	A	B	H	B	H	H	H	B	H	B	H	A	A	B	H	A	B	H	H
	A04	3254120	H	B	B	B	H	H	B	A	B	B	H	B	A	B	B	H	B	H	B	A	B	H	A	H	H	H	A	H	H	B	H	B	H	H	H	B	H	B	H	A	A	B	H	A	B	H	H
	A04	3254123	H	B	B	B	H	H	B	A	B	B	H	B	A	B	B	H	B	H	B	A	B	H	A	H	H	H	A	H	H	B	H	B	H	H	H	B	H	B	H	A	A	B	H	A	B	H	H
	A04	3254126	H	B	B	B	H	H	B	A	B	B	H	B	A	B	B	H	B	H	B	A	B	H	A	H	H	H	A	H	H	B	H	B	H	H	H	B	H	B	H	A	A	B	H	A	B	H	H
	A04	3254178	H	B	B	B	H	H	B	A	B	B	H	B	A	B	B	H	B	H	B	A	B	H	A	H	H	H	A	H	H	B	H	B	H	H	H	B	H	B	H	A	A	B	H	A	B	H	H
	A04	3295715	H	B	B	B	H	H	B	A	B	B	H	B	A	B	B	H	B	H	B	A	H	H	A	H	H	H	A	H	H	B	H	B	H	H	H	H	H	B	H	A	A	B	H	A	B	H	H
	A04	3295758	H	B	B	B	H	H	B	A	B	B	H	B	A	B	B	H	B	H	B	A	H	H	A	H	H	H	A	H	H	B	H	B	H	H	H	H	H	B	H	A	A	B	H	A	B	H	H
	A04	3431478	H	B	B	B	H	H	B	A	B	B	H	B	A	B	B	H	B	H	B	H	H	H	A	H	H	H	A	H	H	B	H	B	H	H	H	H	H	B	H	H	A	B	H	A	B	H	H
	A04	3431482	H	B	B	B	H	H	B	A	B	B	H	B	A	B	B	H	B	H	B	H	H	H	A	H	H	H	A	H	H	B	H	B	H	H	H	H	H	B	H	H	A	B	H	A	B	H	H
	A04	3431501	H	B	B	B	H	H	B	A	B	B	H	B	A	B	B	H	B	H	B	H	H	H	A	H	H	H	A	H	H	B	H	B	H	H	H	H	H	B	H	H	A	B	H	A	B	H	H
	A04	3431560	H	B	B	B	H	H	B	A	B	B	H	B	A	B	B	H	B	H	B	H	H	H	A	H	H	H	A	H	H	B	H	B	H	H	H	H	H	B	H	H	A	B	H	A	B	H	H
	A04	3723157	H	B	B	B	H	H	B	A	B	B	H	B	A	B	B	H	B	H	B	H	H	H	A	H	H	H	A	H	H	B	H	B	A	H	H	H	H	B	H	H	A	B	H	A	B	H	H
	A04	3901190	H	B	B	B	H	H	H	A	B	B	H	B	A	B	B	H	B	H	B	H	H	H	A	H	H	H	A	H	H	B	H	B	H	H	H	H	H	B	H	H	A	B	H	A	B	H	H
	A04	3996402	H	B	B	B	H	H	B	A	B	B	H	B	A	B	B	H	B	H	B	H	H	H	A	H	H	H	A	H	H	B	H	B	H	H	H	H	H	B	H	H	A	B	H	A	B	H	H
	A04	4306503	H	B	B	B	H	H	B	A	B	B	H	B	A	B	B	H	B	H	B	H	H	H	H	H	H	H	A	H	H	B	H	B	H	H	H	H	H	B	H	H	A	B	H	A	B	H	H
	A04	4306513	H	B	B	B	H	H	B	A	B	B	H	B	A	B	B	H	B	H	B	H	H	H	H	H	H	H	A	H	H	B	H	B	H	H	H	H	H	B	H	H	A	B	H	A	B	H	H
	A04	4306572	H	B	B	B	H	H	B	A	B	B	H	B	A	B	B	H	B	H	B	H	H	H	H	H	H	H	A	H	H	B	H	B	H	H	H	H	H	B	H	H	A	B	H	A	B	H	H
	A04	4306582	H	B	B	B	H	H	B	A	B	B	H	B	A	B	B	H	B	H	B	H	H	H	A	H	H	H	A	H	H	B	H	B	H	H	H	H	H	B	H	H	A	B	H	A	B	H	H
	A04	4722786	H	B	B	B	H	H	B	A	B	B	H	B	A	B	B	H	B	H	B	H	B	H	H	H	H	H	A	H	H	B	H	B	H	H	H	H	H	B	H	H	A	B	H	A	B	H	H
	A04	4822725	H	B	B	B	H	H	B	A	B	B	H	B	A	B	B	H	B	H	B	H	H	H	A	H	H	H	A	H	H	B	H	B	H	H	H	H	H	B	H	H	A	B	H	A	B	H	H
	A04	4822778	H	B	B	B	H	H	B	A	B	B	H	B	A	B	B	H	B	H	B	H	H	H	A	H	H	H	A	H	H	B	H	B	H	H	H	H	H	B	H	H	A	B	H	A	B	H	H
	A04	4822797	H	B	B	B	H	H	B	A	B	B	H	B	A	B	B	H	B	H	B	H	H	H	A	H	H	H	A	H	H	B	H	B	H	H	H	H	H	B	H	H	A	B	H	A	B	H	H
	A04	4967137	H	B	B	B	H	H	B	A	B	B	H	B	A	B	B	H	B	H	B	H	B	H	A	H	H	H	A	H	H	B	H	B	H	H	H	H	H	B	H	H	A	B	H	A	B	H	H
	A04	5133918	H	B	B	B	A	H	B	A	B	B	H	B	A	B	B	H	B	H	B	H	B	H	A	H	H	H	A	H	H	B	H	B	H	H	H	H	H	B	H	H	A	B	H	A	B	H	H
	A04	5271968	H	B	B	B	H	H	B	A	B	B	H	B	A	B	B	H	B	H	B	H	B	H	A	H	H	H	A	H	H	B	H	B	H	H	H	H	H	B	H	H	A	B	H	A	B	H	H
	A04	5293738	H	B	B	B	H	H	B	A	B	B	H	B	A	B	B	H	B	H	B	H	H	H	A	H	H	H	A	H	H	B	H	B	H	H	H	H	H	B	H	H	A	B	H	A	B	H	H
	A04	5344454	H	B	B	B	H	H	B	A	B	B	H	B	A	B	B	H	B	H	B	H	B	H	A	H	H	H	A	H	H	B	H	B	H	H	H	H	H	B	H	H	A	B	H	A	B	H	H
	A04	5377808	H	B	B	B	H	H	B	A	B	B	H	B	A	B	B	H	B	H	B	H	B	H	A	H	H	H	A	H	H	B	H	B	H	H	H	A	H	B	H	H	A	B	H	A	B	H	H
	A04	5463729	H	B	B	B	H	H	B	A	B	B	H	B	A	B	B	H	B	H	B	H	B	H	A	H	H	H	A	H	H	B	H	B	H	H	H	H	H	B	H	H	A	B	H	A	B	H	H
	A04	5463736	H	B	B	B	H	H	B	A	B	B	H	B	A	B	B	H	B	H	B	H	B	H	A	H	H	H	A	H	H	B	H	B	H	H	H	H	H	B	H	H	A	B	H	A	B	H	H
	A04	5463774	H	B	B	B	H	H	B	A	B	B	H	B	A	B	B	H	B	H	B	H	B	H	A	H	H	H	A	H	H	B	H	B	H	H	H	H	H	B	H	H	A	B	H	A	B	H	H
	A04	6016141	H	B	B	B	H	H	H	A	B	B	H	B	A	B	B	H	B	H	B	H	B	H	A	H	H	H	A	H	H	B	H	B	H	H	H	H	H	B	H	H	A	B	H	A	B	H	H
	A04	6016168	H	B	B	B	H	H	H	A	B	B	H	B	A	B	B	H	B	H	B	H	B	H	A	H	H	H	A	H	H	B	H	B	H	H	H	H	H	B	H	H	A	B	H	A	B	H	H
	A04	6016350	H	B	B	B	H	H	H	A	B	B	H	B	A	B	B	H	B	H	B	H	B	H	A	H	H	H	A	H	H	B	H	B	H	H	H	H	H	B	H	H	A	B	H	A	B	H	H
	A04	6016352	H	B	B	B	H	H	H	A	B	B	H	B	A	B	B	H	B	H	B	H	B	H	A	H	H	H	A	H	H	B	H	B	H	H	H	H	H	B	H	H	A	B	H	A	B	H	H
	A04	6016386	H	B	B	B	H	H	H	A	B	B	H	B	A	B	B	H	B	H	B	H	B	H	A	H	H	H	A	H	H	B	H	B	H	H	H	H	H	B	H	H	A	B	H	A	B	H	H
	A04	6043434	H	B	B	B	H	H	B	H	B	B	H	B	A	B	B	H	B	H	B	H	B	H	A	H	H	H	A	H	H	B	H	B	H	H	H	H	H	B	H	H	A	B	H	A	B	H	H
	A04	6043440	H	B	B	B	H	H	B	H	B	B	H	B	A	B	B	H	B	H	B	H	B	H	A	H	H	H	A	H	H	B	H	B	H	H	H	H	H	B	H	H	A	B	H	A	B	H	H
	A04	6046036	H	B	B	B	H	H	B	A	B	B	H	B	A	B	B	H	B	H	B	H	B	H	A	H	H	H	A	H	H	B	H	B	H	H	H	H	H	B	H	H	A	B	H	A	B	H	H
	A04	6046049	H	B	B	B	H	H	B	A	B	B	H	B	A	B	B	H	B	H	B	H	B	H	A	H	H	H	A	H	H	B	H	B	H	H	H	B	H	B	H	H	A	B	H	A	B	H	H
	A04	6046082	H	B	B	B	H	B	B	A	B	B	H	B	A	B	B	H	B	H	B	H	B	H	A	H	H	H	A	H	H	B	H	B	H	H	H	H	H	B	H	H	A	B	H	A	B	H	H
	A04	6046083	H	B	B	B	H	B	B	A	B	B	H	B	A	B	B	H	B	H	B	H	B	H	A	H	H	H	A	H	H	B	H	B	H	H	H	H	H	B	H	H	A	B	H	A	B	H	H
	A04	6046138	H	B	B	B	H	H	B	A	B	B	H	B	A	B	B	H	B	H	B	H	B	H	A	H	H	H	A	H	H	B	H	B	H	H	H	H	H	B	H	H	A	B	H	A	B	H	H
	A04	6161194	H	B	B	B	H	H	B	A	B	B	H	B	A	B	B	H	B	H	B	H	B	H	A	H	H	H	A	H	H	B	H	B	H	H	H	H	H	B	H	H	A	B	H	A	B	H	H
	A04	6472101	H	B	B	B	H	H	B	H	B	B	H	B	A	B	B	H	B	H	B	H	B	H	A	H	H	H	A	H	H	B	H	B	A	H	H	H	H	B	H	H	A	B	H	A	B	H	H
	A04	6472107	H	B	B	B	H	H	B	H	B	B	H	B	A	B	B	H	B	H	B	H	B	H	A	H	H	H	A	H	H	B	H	B	A	H	H	H	H	B	H	H	A	B	H	A	B	H	H
	A04	6472431	H	B	B	B	H	H	B	H	B	B	H	B	A	B	B	H	B	H	B	H	B	H	A	H	H	H	A	H	H	B	H	B	A	H	H	H	H	B	H	H	A	B	H	A	B	H	H
	A04	6802689	H	B	B	B	H	H	B	H	B	B	H	B	A	B	B	H	B	H	B	H	H	H	A	H	H	H	A	H	H	B	H	B	H	H	H	H	H	B	H	H	A	B	H	A	B	H	H
	A04	6802762	H	B	B	B	H	H	B	A	B	B	H	B	A	B	B	H	B	H	B	H	B	H	A	H	H	H	A	H	H	B	H	B	H	H	H	H	H	B	H	H	A	B	H	A	B	H	H
	A04	6802798	H	B	B	B	H	H	B	H	B	B	H	B	A	B	B	H	B	H	B	H	B	H	A	H	H	H	A	H	H	B	H	B	H	H	H	H	H	B	H	H	A	B	H	A	B	H	H
	A04	7035822	H	B	B	B	H	H	B	A	B	B	H	B	A	B	B	H	B	H	B	H	B	H	A	H	H	H	A	B	H	B	H	B	H	B	H	H	H	B	B	H	A	B	H	A	B	H	H
	A04	7035985	H	B	B	B	H	H	B	A	B	B	H	B	A	B	B	H	B	H	B	H	B	H	A	H	H	H	A	B	H	B	H	B	H	B	H	H	H	B	B	H	A	B	H	A	B	H	H
	A04	7036036	H	B	B	B	H	H	B	A	B	B	H	B	A	B	B	H	B	H	B	H	B	H	A	H	H	H	A	B	H	B	H	B	H	B	H	H	H	B	B	H	A	B	H	A	B	H	H
	A04	7043077	H	B	B	B	H	H	B	A	B	B	H	B	A	B	B	H	B	A	B	H	B	H	A	H	H	H	A	H	H	B	H	B	H	H	H	H	H	B	H	H	A	B	H	A	B	H	H
	A04	7043092	H	B	B	B	H	H	B	A	B	B	H	B	A	B	B	H	B	A	B	H	B	H	A	H	H	H	A	H	H	B	H	B	H	H	H	H	H	B	H	H	A	B	H	A	B	H	H
	A04	7466832	H	B	B	B	H	H	B	H	B	B	H	B	A	B	B	H	B	H	B	H	B	H	A	H	H	H	A	H	H	B	H	B	H	H	H	H	H	B	H	H	A	B	H	A	B	H	H
	A04	7467124	H	B	B	B	H	H	B	A	B	B	H	B	A	B	B	H	B	H	B	H	B	H	A	H	H	H	A	H	H	B	H	B	H	H	H	H	H	B	H	H	A	B	H	A	B	H	H
	A04	7467222	H	B	B	B	H	H	B	A	B	B	H	B	A	B	B	H	B	H	B	H	B	H	A	H	H	H	A	H	H	B	H	B	H	H	H	H	H	B	H	H	A	B	H	A	B	H	H
	A04	7529790	H	B	B	B	H	H	B	A	B	B	H	B	A	B	B	H	B	H	B	H	B	H	A	H	H	H	A	H	H	B	H	B	H	H	H	H	H	B	H	H	A	B	H	A	B	H	H
	A04	7530147	H	B	B	B	H	H	B	A	B	B	H	B	A	B	B	H	B	H	B	H	B	H	A	H	H	H	A	H	H	B	H	B	H	H	H	H	H	B	H	H	A	B	H	A	B	H	H
	A04	7621565	H	B	B	B	H	H	B	H	B	B	H	B	A	B	B	H	B	H	B	H	B	H	A	H	H	H	A	H	H	B	H	B	H	B	H	H	H	B	H	H	A	B	H	A	B	H	H
	A04	7621637	H	B	B	B	H	H	B	H	B	B	H	B	A	B	B	H	B	H	B	H	B	H	A	H	H	H	A	H	H	B	H	B	H	B	H	H	H	B	H	H	A	B	H	A	B	H	H
	A04	7795796	H	B	B	B	H	H	B	H	B	B	H	B	A	B	B	H	B	H	B	H	B	H	A	H	H	H	A	H	H	B	H	B	H	H	H	H	H	B	H	H	A	B	H	A	B	H	H
	A04	7795820	H	B	B	B	H	H	B	H	B	B	H	B	A	B	B	H	B	H	B	H	B	H	A	H	H	H	A	H	H	B	H	B	H	H	H	H	H	B	H	H	A	B	H	A	B	H	H
	A04	7795826	H	B	B	B	H	H	B	H	B	B	H	B	A	B	B	H	B	H	B	H	B	H	A	H	H	H	A	H	H	B	H	B	H	H	H	H	H	B	H	H	A	B	H	A	B	H	H
	A04	8393181	H	B	B	B	H	H	B	A	B	B	H	B	A	B	B	H	B	H	B	H	B	H	A	H	H	H	A	H	H	B	H	B	H	H	H	H	H	B	H	H	A	B	H	A	B	H	H
	A04	8393184	H	B	B	B	H	H	B	A	B	B	H	B	A	B	B	H	B	H	B	H	B	H	A	H	H	H	A	H	H	B	H	B	H	H	H	H	H	B	H	H	A	B	H	A	B	H	H
	A04	8393189	H	B	B	B	H	H	B	A	B	B	H	B	A	B	B	H	B	H	B	H	B	H	A	H	H	H	A	H	H	B	H	B	H	H	H	H	H	B	H	H	A	B	H	A	B	H	H
	A04	8393193	H	B	B	B	H	H	B	A	B	B	H	B	A	B	B	H	B	H	B	H	B	H	A	H	H	H	A	H	H	B	H	B	H	H	H	H	H	B	H	H	A	B	H	A	B	H	H
	A04	8393327	H	B	B	B	H	H	B	A	B	B	H	B	A	B	B	H	B	H	B	H	B	H	A	H	H	H	A	H	H	B	H	B	H	H	H	H	H	B	H	H	A	B	H	A	B	H	H
	A04	8393331	H	B	B	B	H	H	B	A	B	B	H	B	A	B	B	H	B	H	B	H	B	H	A	H	H	H	A	H	H	B	H	B	H	H	H	H	H	B	H	H	A	B	H	A	B	H	H
	A04	8393367	H	B	B	B	H	H	B	A	B	B	H	B	A	B	B	H	B	H	B	H	B	H	A	H	H	H	A	H	H	B	H	B	H	H	H	H	H	B	H	H	A	B	H	A	B	H	H
	A04	8474104	H	B	B	B	H	H	H	A	B	B	H	B	A	B	B	H	B	H	B	H	B	H	A	H	H	H	A	H	H	B	H	B	H	H	H	H	H	B	H	H	A	B	H	A	B	H	H
	A04	8474146	H	B	B	B	H	H	H	A	B	B	H	B	A	B	B	H	B	H	B	H	B	H	A	H	H	H	A	H	H	B	H	B	H	H	H	H	H	B	H	H	A	B	H	A	B	H	H
	A04	8557105	H	B	B	B	H	H	B	H	B	B	H	B	A	B	B	H	B	H	B	H	H	H	A	H	H	H	A	H	H	B	A	B	H	A	H	H	H	B	H	H	A	B	H	A	B	H	H
	A04	8612261	H	B	B	B	H	H	B	A	B	B	H	B	A	B	B	H	H	H	B	H	H	H	A	H	H	H	A	H	H	B	H	B	H	A	H	H	H	B	H	H	A	B	H	A	B	H	H
	A04	8612274	H	B	B	B	H	H	B	A	B	B	H	B	A	B	B	H	H	H	B	H	H	H	A	H	H	H	A	H	H	B	H	B	H	A	H	H	H	B	H	H	A	B	H	A	B	H	H
	A04	8612292	H	B	B	B	H	H	B	A	B	B	H	B	A	B	B	H	H	H	B	H	H	H	A	H	H	H	A	H	H	B	H	B	H	A	H	H	H	B	H	H	A	B	H	A	B	H	H
	A04	9084467	H	B	B	B	H	H	B	A	B	B	H	B	A	B	B	H	H	H	B	H	H	H	A	H	H	H	A	H	H	B	A	B	H	A	H	H	H	B	H	H	A	B	H	A	B	H	H
	A04	9092449	H	B	B	B	H	H	B	A	B	B	H	B	A	B	B	H	H	H	B	H	H	H	A	H	H	H	A	H	H	B	H	B	H	A	H	H	H	B	H	H	A	B	H	A	B	H	H
	A04	9092493	H	B	B	B	H	H	B	A	B	B	H	B	A	B	B	H	H	H	B	H	H	H	A	H	H	H	A	H	H	B	H	B	H	A	H	H	H	B	H	H	A	B	H	A	B	H	H
	A04	9162899	H	B	B	B	H	H	H	A	B	B	H	B	A	B	B	H	H	H	B	H	H	H	A	H	H	H	A	H	H	B	A	B	H	A	H	H	H	B	H	H	A	B	H	A	B	H	H
	A04	9192820	A	B	B	B	A	H	H	A	B	B	A	B	A	B	B	H	A	H	B	A	H	H	A	A	A	H	H	A	A	B	A	B	A	A	H	H	A	B	A	H	A	B	A	A	B	H	H
	A04	9192822	A	B	B	B	A	H	H	A	B	B	A	B	A	B	B	H	A	H	B	A	H	H	A	A	A	H	H	A	A	B	A	B	A	A	H	H	A	B	A	H	A	B	A	A	B	H	H
	A04	9323213	H	B	B	B	H	H	H	A	B	B	H	B	A	B	B	H	H	H	B	H	H	H	H	H	H	H	A	H	H	B	A	B	H	A	H	H	H	B	H	H	A	B	H	A	B	H	H
	A04	9381656	H	B	B	B	H	H	H	A	B	B	H	B	A	B	B	H	H	H	B	H	H	H	H	H	H	H	A	H	H	B	A	B	H	A	H	H	H	B	H	H	A	B	H	A	B	H	H
	A04	9381707	H	B	B	B	H	H	H	A	B	B	H	B	A	B	B	H	H	H	B	H	H	H	H	H	H	H	A	H	H	B	A	B	H	A	H	H	H	B	H	H	A	B	H	A	B	H	H
	A04	9381711	H	B	B	B	H	H	H	A	B	B	H	B	A	B	B	H	H	H	B	H	H	H	H	H	H	H	A	H	H	B	A	B	H	A	H	H	H	B	H	H	A	B	H	A	B	H	H
	A04	9381715	H	B	B	B	H	H	H	A	B	B	H	B	A	B	B	H	H	H	B	H	H	H	H	H	H	H	A	H	H	B	A	B	H	A	H	H	H	B	H	H	A	B	H	A	B	H	H
	A04	9381782	H	B	B	B	H	H	H	A	B	B	H	B	A	B	B	H	H	H	B	H	H	H	H	H	H	H	A	H	H	B	A	B	H	A	H	H	H	B	H	H	A	B	H	A	B	H	H
	A04	9381807	H	B	B	B	H	H	H	A	B	B	H	B	A	B	B	H	H	H	B	H	H	H	H	H	H	H	A	H	H	B	H	B	H	A	H	H	H	B	H	H	A	B	H	A	B	H	H
	A04	10087279	H	B	B	B	H	H	H	A	B	B	H	B	A	B	B	H	H	H	B	H	H	H	A	H	H	H	A	H	H	B	H	B	H	A	H	H	H	B	H	H	A	B	H	A	B	H	A
	A04	10087304	H	B	B	B	H	H	H	A	B	B	H	B	A	B	B	H	H	H	B	H	H	H	A	H	H	H	A	H	H	B	H	B	H	A	H	H	H	B	H	H	A	B	H	A	B	H	A
	A04	10087305	H	B	B	B	H	H	H	A	B	B	H	B	A	B	B	H	H	H	B	H	H	H	A	H	H	H	A	H	H	B	H	B	H	A	H	H	H	B	H	H	A	B	H	A	B	H	A
	A04	10087321	H	B	B	B	H	H	H	A	B	B	H	B	A	B	B	H	H	H	B	H	H	H	A	H	H	H	A	H	H	B	H	B	H	A	H	H	H	B	H	H	A	B	H	A	B	H	A
	A04	10087337	H	B	B	B	H	H	H	A	B	B	H	B	A	B	B	H	H	H	B	H	H	H	A	H	H	H	A	H	H	B	H	B	H	A	H	H	H	B	H	H	A	B	H	A	B	H	A
	A04	10087751	H	B	B	B	H	H	H	A	B	B	H	B	A	B	B	H	H	H	B	H	H	H	A	H	H	H	A	H	H	B	H	B	H	A	H	H	H	B	H	H	A	B	H	A	B	H	A
	A04	10087754	H	B	B	B	H	H	H	A	B	B	H	B	A	B	B	H	H	H	B	H	H	H	A	H	H	H	A	H	H	B	H	B	H	A	H	H	H	B	H	H	A	B	H	A	B	H	A
	A04	10331036	H	B	B	B	H	H	H	H	B	B	H	B	A	B	B	H	H	H	B	H	H	H	A	H	H	H	A	H	H	B	H	B	H	A	H	H	H	B	A	H	A	B	H	A	B	H	A
	A04	10868747	H	B	B	B	H	H	H	A	B	B	H	B	H	B	B	H	H	H	B	H	H	H	A	H	H	A	A	H	H	B	H	B	H	A	H	H	H	B	H	H	H	B	H	A	B	H	A
	A04	10868769	H	B	B	B	H	H	H	A	B	B	H	B	H	B	B	H	H	H	B	H	H	H	A	H	H	A	A	H	H	B	H	B	H	A	H	H	H	B	H	H	H	B	H	A	B	H	A
	A04	10889274	H	B	B	B	H	H	H	A	B	B	H	B	H	B	B	H	H	H	B	H	H	H	A	H	H	A	A	H	H	B	H	B	H	A	H	H	H	B	H	H	H	B	H	A	B	H	A
	A04	10889303	H	B	B	B	H	H	H	A	B	B	H	B	H	B	B	H	H	H	B	H	H	H	A	H	H	A	A	H	H	B	H	B	H	A	H	H	H	B	H	H	H	B	H	A	B	H	A
	A04	10914299	H	B	B	B	H	H	H	A	B	B	H	B	H	B	B	H	H	H	B	H	H	H	A	H	H	A	A	H	H	B	H	B	H	A	H	H	H	B	H	H	H	B	H	A	B	H	A
	A04	10953313	H	B	B	B	H	H	H	A	B	B	H	B	H	B	B	H	H	H	B	H	H	H	A	H	H	A	A	H	H	B	H	B	H	A	H	H	H	B	H	H	H	B	H	A	B	H	A
	A04	11094470	H	B	B	B	H	H	H	A	B	H	H	B	H	B	B	H	H	H	B	H	H	H	A	H	H	A	A	H	H	B	H	B	H	A	H	H	H	B	H	H	H	B	H	A	B	H	A
	A04	11164292	H	B	B	B	H	H	H	A	B	H	H	B	H	B	B	A	H	H	B	H	H	H	A	H	H	A	A	H	H	B	H	B	H	A	H	H	H	B	H	H	H	B	H	A	B	H	A
	A04	11164625	H	B	B	B	H	H	H	A	B	H	H	B	H	B	B	A	H	H	B	H	H	H	A	H	H	A	A	H	H	B	H	B	H	A	H	H	H	B	H	H	H	B	H	A	B	H	A
	A04	11244964	H	B	B	B	H	H	H	A	B	H	H	B	H	B	B	A	H	H	B	A	H	H	A	H	H	A	A	H	H	B	H	B	H	A	H	H	H	B	H	H	H	B	H	A	B	H	A
	A04	11342412	B	H	B	B	B	B	H	A	H	B	H	B	B	B	H	A	B	B	B	B	H	B	A	B	B	A	A	B	B	H	B	B	H	A	H	B	B	H	H	H	B	B	B	A	H	H	A
	A04	11342416	B	H	B	B	B	B	H	A	H	B	H	B	B	B	H	A	B	B	B	B	H	B	A	B	B	A	A	B	B	H	B	B	H	A	H	B	B	H	H	H	B	B	B	A	H	H	A
	A04	11342448	B	H	B	B	B	B	H	A	H	B	H	B	B	B	H	A	B	B	B	B	H	B	A	B	B	A	A	B	B	H	B	B	H	A	H	B	B	H	H	H	B	B	B	A	H	H	A
	A04	11512400	H	B	B	B	H	H	H	A	B	H	H	B	H	B	H	A	H	H	B	H	H	H	A	H	H	A	A	H	H	B	H	B	H	A	A	H	H	B	H	H	H	B	H	A	B	H	A
	A04	11543720	H	B	B	B	H	H	H	A	B	H	H	B	H	B	H	A	H	H	B	H	H	H	A	H	H	A	A	H	H	B	H	B	H	A	A	H	H	B	H	H	H	B	H	A	B	H	A
	A04	11579979	H	B	B	B	H	H	H	A	B	H	H	B	H	B	H	A	H	H	B	H	H	H	A	H	H	A	A	H	H	B	H	B	H	A	A	H	H	B	H	H	H	B	H	A	B	H	A
	A04	11579990	H	B	B	B	H	H	H	A	B	H	H	B	H	B	H	A	H	H	B	H	H	H	A	H	H	A	A	H	H	B	H	B	H	A	A	H	H	B	H	H	H	B	H	A	B	H	A
	A04	11579995	H	B	B	B	H	H	H	A	B	H	H	B	H	B	H	A	H	H	B	H	H	H	A	H	H	A	A	H	H	B	H	B	H	A	A	H	H	B	H	H	H	B	H	A	B	H	A
	A04	11580024	H	B	B	B	H	H	H	A	B	H	H	B	H	B	H	A	H	H	B	H	H	H	A	H	H	A	A	H	H	B	H	B	H	A	A	H	H	B	H	H	H	B	H	A	B	H	A
	A04	11580082	H	B	B	B	H	H	H	A	B	H	H	B	H	B	H	A	H	H	B	H	H	H	A	H	H	A	A	H	H	B	H	B	H	A	A	H	H	B	H	H	H	B	H	A	B	H	A
	A04	11638546	H	B	B	B	H	H	H	A	B	H	H	B	H	B	H	A	H	H	B	H	H	H	H	H	H	A	A	H	H	B	H	B	H	A	A	H	H	B	H	H	H	B	H	A	B	H	A
	A04	11639841	H	B	B	B	H	H	H	A	B	H	H	B	H	H	H	A	H	H	B	H	H	H	A	H	H	A	A	H	H	B	H	B	H	A	A	H	H	B	H	H	H	B	H	A	B	H	A
	A04	11658651	H	B	B	B	H	H	H	A	B	H	H	B	H	B	H	A	H	H	B	H	H	H	A	H	H	A	A	H	H	B	H	B	H	A	A	H	H	B	H	H	H	B	H	A	B	H	A
	A04	11810558	H	B	B	B	H	H	H	A	B	H	H	B	H	B	H	A	H	H	B	H	H	H	A	H	H	A	A	H	H	B	H	B	H	A	A	H	H	B	H	H	H	B	H	A	B	H	A
	A04	11923093	H	B	B	B	H	H	H	A	B	H	H	B	H	B	H	A	H	H	B	H	H	H	A	H	H	A	A	H	H	B	H	B	H	A	A	H	H	B	H	H	H	B	H	A	B	H	A
	A04	11923119	H	B	B	B	H	H	H	A	B	H	H	B	H	B	H	A	H	H	B	H	H	H	A	H	H	A	A	H	H	B	H	B	H	A	A	H	H	B	H	H	H	B	H	A	B	H	A
	A04	12175344	H	B	B	B	H	H	H	A	B	H	H	B	H	B	H	A	H	H	B	H	H	H	A	H	H	A	A	H	H	B	H	B	H	A	A	H	H	B	H	H	H	B	H	A	B	H	A
	A04	12205818	H	B	B	B	H	H	H	A	B	H	H	B	H	B	H	A	H	H	B	H	H	H	A	H	H	A	A	H	H	B	H	B	H	A	A	H	H	B	H	H	H	B	H	A	B	H	H
	A04	12216801	H	B	B	B	H	H	H	H	B	H	H	B	H	B	H	A	H	H	B	H	H	H	A	H	H	A	A	H	H	B	H	B	H	A	A	H	H	B	H	H	H	B	H	A	B	H	A
	A04	12677063	H	B	B	B	H	H	H	A	B	H	H	B	H	B	H	A	H	H	B	H	H	H	A	H	H	A	A	H	H	B	H	B	H	A	A	H	H	B	H	H	H	B	H	A	B	H	A
	A04	12677076	H	B	B	B	H	H	H	A	B	H	H	B	H	B	H	A	H	H	B	H	H	H	A	H	H	A	A	H	H	B	H	B	H	A	A	H	H	B	H	H	H	B	H	A	B	H	A
	A04	12677103	H	B	B	B	H	H	H	A	B	H	H	B	H	B	H	A	H	H	B	H	H	H	A	H	H	A	A	H	H	B	H	B	H	A	A	H	H	B	H	H	H	B	H	A	B	H	A
	A04	12677130	H	B	B	B	H	H	H	A	B	H	H	B	H	B	H	A	H	H	B	H	H	H	A	H	H	A	A	H	H	B	H	B	H	A	A	H	H	B	H	H	H	B	H	A	B	H	A
	A04	12772497	B	B	B	B	B	B	B	A	B	B	B	B	B	B	B	A	B	B	B	B	B	B	A	B	B	A	A	B	B	B	B	B	B	A	A	A	B	B	B	B	B	B	B	A	B	B	A
	A04	12784529	B	B	B	B	B	B	B	A	B	B	B	B	B	B	B	A	B	B	B	B	B	B	A	B	B	A	A	B	B	B	B	B	B	A	A	B	B	B	B	B	B	B	B	A	B	B	A
	A04	12839799	H	B	B	B	H	H	H	A	B	H	H	B	H	B	H	A	H	H	B	H	H	H	A	H	H	A	A	H	H	B	H	B	H	A	A	H	H	B	H	H	B	B	H	A	B	H	A
	A04	13044044	H	B	B	B	H	H	H	A	B	H	H	B	B	B	A	A	H	H	B	H	H	H	A	H	H	A	A	H	H	B	H	B	H	A	A	H	H	B	H	H	B	B	H	A	B	H	A
	A04	13044081	H	B	B	B	H	H	H	A	B	H	H	B	B	B	A	A	H	H	B	H	H	H	A	H	H	A	A	H	H	B	H	B	H	A	A	H	H	B	H	H	B	B	H	A	B	H	A
	A04	13044085	H	B	B	B	H	H	H	A	B	H	H	B	B	B	A	A	H	H	B	H	H	H	A	H	H	A	A	H	H	B	H	B	H	A	A	H	H	B	H	H	B	B	H	A	B	H	A
	A04	13044089	H	B	B	B	H	H	H	H	B	H	H	B	B	B	A	A	H	H	B	H	H	H	A	H	H	A	A	H	H	B	H	B	H	A	A	H	H	B	H	H	B	B	H	A	B	H	A
	A04	13044111	H	B	B	B	H	H	H	A	B	H	H	B	B	B	A	A	H	H	B	H	H	H	A	H	H	A	A	H	H	B	H	B	H	A	A	H	H	B	H	H	B	B	H	A	B	H	A
	A04	13044507	H	B	B	B	H	H	H	H	B	H	H	B	B	B	A	A	H	H	B	H	H	H	A	H	H	A	A	H	H	B	H	B	H	A	A	H	H	B	H	H	B	B	H	A	B	H	A
	A04	13086468	H	B	B	B	H	H	H	A	B	H	H	B	B	B	A	A	H	H	B	H	H	H	A	H	H	A	A	H	H	B	H	B	H	A	A	H	H	B	H	H	B	B	H	A	B	H	A
	A04	13094526	H	B	B	B	H	B	H	A	B	H	H	B	B	B	A	A	H	H	B	H	H	H	H	H	H	A	A	H	H	B	B	B	H	A	A	H	H	B	H	H	B	B	H	A	H	H	A
	A04	13119202	H	B	B	B	H	H	H	A	B	H	H	B	B	B	A	A	H	H	B	H	H	H	A	H	H	A	A	H	H	B	H	B	H	A	A	H	H	B	H	H	B	B	H	A	B	H	A
	A04	13189378	B	B	B	B	B	B	H	H	B	B	H	B	B	B	A	A	B	B	B	B	B	B	A	B	H	A	A	B	B	B	B	B	B	A	A	B	B	B	B	B	B	B	B	A	B	H	A
	A04	13189557	H	B	B	B	H	H	H	A	B	H	H	B	B	B	A	A	H	H	B	H	H	H	A	H	H	A	A	H	H	B	H	B	H	A	A	H	H	B	H	H	B	B	H	A	B	H	A
	A04	13803900	H	B	B	B	H	H	H	A	B	H	H	B	B	B	H	A	H	H	B	H	H	H	A	H	H	A	A	H	H	B	H	B	H	A	A	H	H	B	H	H	B	B	H	A	H	H	A
	A04	13827458	H	B	B	B	H	H	H	A	B	H	H	B	B	B	A	A	H	H	B	H	H	H	A	H	H	A	A	H	H	B	H	B	H	A	A	H	H	B	H	H	B	B	H	A	H	H	H
	A04	13827462	H	B	B	B	H	H	H	A	B	H	H	B	B	B	A	A	H	H	B	H	H	H	A	H	H	A	A	H	H	B	H	B	H	A	A	H	H	B	H	H	B	B	H	A	H	H	H
	A04	14079261	H	H	B	B	H	H	H	A	B	H	H	B	B	H	A	A	H	H	B	H	H	H	H	H	H	A	A	H	H	B	H	B	H	A	A	H	H	B	H	H	B	H	H	A	H	H	A
	A04	14100101	H	H	B	B	H	H	H	A	B	H	H	B	B	B	A	A	H	H	B	H	H	H	A	H	H	A	A	H	H	B	H	B	H	A	A	H	H	B	H	H	B	H	H	A	H	H	A
	A04	14100104	H	H	B	B	H	H	H	A	B	H	H	B	B	B	A	A	H	H	B	H	H	H	A	H	H	A	A	H	H	B	H	B	H	A	A	H	H	B	H	H	B	H	H	A	H	H	A
	A04	14100561	H	H	B	B	H	H	H	A	B	H	H	B	B	B	A	A	H	H	B	H	H	H	A	H	H	A	A	H	H	B	H	B	H	A	A	H	H	B	H	H	B	H	H	A	H	H	A
	A04	14100579	H	H	B	B	H	H	H	A	B	H	H	B	B	B	A	A	H	H	B	H	H	H	A	H	H	A	A	H	H	B	H	B	H	A	A	H	H	B	H	H	B	H	H	A	H	H	A
	A04	14100582	H	H	B	B	H	H	H	A	B	H	H	B	B	B	A	A	H	H	B	H	H	H	A	H	H	A	A	H	H	B	H	B	H	A	A	H	H	B	H	H	B	H	H	A	H	H	A
	A04	14100607	H	H	B	B	H	H	H	A	B	H	H	B	B	B	A	A	H	H	B	H	H	H	A	H	H	A	A	H	H	B	H	B	H	A	A	H	H	B	H	H	B	H	H	A	H	H	A
	A04	14141563	H	H	B	B	H	H	H	A	B	H	H	B	B	B	A	A	H	H	B	H	H	H	A	H	H	A	A	H	H	B	H	B	H	A	A	H	H	B	H	H	B	H	H	A	H	H	A
	A04	14407395	A	A	B	B	H	H	H	A	B	H	H	B	B	B	A	A	A	H	B	A	H	H	A	A	H	A	H	H	H	B	H	H	A	A	A	A	A	B	H	H	B	H	A	A	H	A	A
	A04	14570564	H	H	B	B	H	H	H	A	B	H	H	B	B	B	A	A	H	H	B	H	H	H	A	H	H	A	H	H	H	B	H	B	H	A	A	H	H	B	H	H	B	H	H	A	H	A	A
	A04	14570860	H	H	B	B	H	H	H	A	B	H	H	B	B	B	A	A	H	H	B	H	H	H	A	H	H	A	H	H	H	B	H	B	H	A	A	H	H	B	H	H	B	H	H	A	H	A	A
	A04	14570901	H	H	B	B	H	H	H	A	B	H	H	B	B	B	A	A	H	H	B	H	H	H	A	H	H	A	H	H	H	B	H	B	H	A	A	H	H	B	H	H	B	H	H	A	H	A	A
	A04	14580468	H	H	B	B	H	H	H	A	B	H	H	B	B	B	A	A	H	H	B	H	H	H	A	H	H	A	H	H	H	B	H	B	H	A	A	H	H	B	H	H	B	H	H	A	H	A	A
	A04	14709703	B	B	B	B	H	B	B	A	B	B	B	B	B	B	A	A	H	H	B	B	B	H	A	H	B	A	H	H	H	B	H	B	H	A	A	H	H	B	B	B	B	B	H	A	H	A	A
	A04	14709736	B	B	B	B	H	B	B	A	B	B	H	B	B	B	A	A	H	H	B	B	B	H	A	H	B	A	H	H	H	B	H	B	H	A	A	H	H	B	B	B	B	B	H	A	H	A	A
	A04	14709750	B	B	B	B	H	B	B	A	B	B	H	B	B	B	A	A	H	H	B	B	B	H	A	H	B	A	H	H	H	B	H	B	H	A	A	H	H	B	B	B	B	B	H	A	H	A	A
	A04	14709759	B	H	B	B	H	B	B	A	B	B	H	B	B	B	A	A	H	H	B	B	B	H	A	H	B	A	H	H	H	B	H	B	H	A	A	H	H	B	B	B	B	B	H	A	H	A	A
	A04	14709765	B	H	B	B	H	B	B	A	B	B	H	B	B	B	A	A	H	H	B	B	B	H	A	H	B	A	H	H	H	B	H	B	H	A	A	H	H	B	B	B	B	B	H	A	H	A	A
	A04	14845143	H	B	H	H	H	B	H	A	H	H	H	H	H	B	A	A	H	H	H	B	H	H	A	H	H	A	H	H	H	H	H	H	H	A	A	H	H	H	H	H	H	H	H	A	B	A	A
	A04	14847362	H	B	H	H	H	H	H	A	H	H	H	H	H	B	A	A	H	H	H	H	H	H	A	H	H	A	H	H	H	H	H	H	A	A	A	A	H	H	H	H	H	H	H	A	H	A	A
	A04	14847368	H	B	H	H	H	H	H	A	H	H	H	H	H	B	A	A	H	H	H	H	H	H	A	H	H	A	H	H	H	H	H	H	A	A	A	A	H	H	H	H	H	H	H	A	H	A	A
	A04	14870293	H	H	B	B	H	H	H	A	B	H	H	B	B	B	A	A	H	H	B	H	H	H	A	H	H	A	H	H	H	B	H	B	H	A	A	H	H	B	H	H	B	H	H	A	H	A	A
	A04	14870301	H	H	B	B	H	H	H	A	B	H	H	B	B	B	A	A	H	H	B	H	H	H	A	H	H	A	H	H	H	B	H	B	H	A	A	H	H	B	H	H	B	H	H	A	H	A	A
	A04	14870304	H	H	B	B	H	H	H	A	B	H	H	B	B	B	A	A	H	H	B	H	H	H	A	H	H	A	H	H	H	B	H	B	H	A	A	H	H	B	H	H	B	H	H	A	H	A	A
	A04	14870334	H	H	B	B	H	H	H	A	B	H	H	B	B	B	A	A	H	H	B	H	H	H	A	H	H	A	H	H	H	B	H	B	H	A	A	H	H	B	H	H	B	H	H	A	H	A	A
	A04	14870562	H	H	B	B	H	H	H	A	B	H	H	B	B	B	A	A	H	H	B	H	H	H	A	H	H	A	H	H	H	B	H	B	H	A	A	H	H	B	H	H	B	H	H	A	H	A	A
	A04	15061775	H	A	B	B	H	H	H	A	B	H	H	B	B	B	A	A	H	H	B	H	H	H	A	H	H	A	H	H	H	B	H	B	H	A	A	H	H	B	H	H	B	H	H	A	H	A	A
	A04	15149798	H	A	B	B	H	A	H	A	B	H	H	B	B	B	A	A	H	H	B	H	H	H	A	H	H	A	H	H	H	B	H	B	H	A	A	H	H	B	H	H	B	H	H	A	H	A	A
	A04	15149832	H	A	B	B	H	A	H	A	B	H	H	B	B	B	A	A	H	H	B	H	H	H	A	H	H	A	H	H	H	B	H	B	H	A	A	H	H	B	H	H	B	H	H	A	H	A	A
	A04	15149835	H	A	B	B	H	A	H	A	B	H	H	B	B	B	A	A	H	H	B	H	H	H	A	H	H	A	H	H	H	B	H	B	H	A	A	H	H	B	H	H	B	H	H	A	H	A	A
	A04	15149871	H	A	B	B	H	H	H	A	B	H	H	B	B	B	A	A	H	H	B	H	H	H	A	H	H	A	H	H	H	B	H	B	H	A	A	H	H	B	H	H	B	H	H	A	H	A	A
	A04	15157006	H	A	B	B	H	H	H	A	B	H	H	B	B	B	A	A	H	H	B	H	H	H	A	H	H	A	H	H	H	B	H	B	H	A	A	H	H	B	H	H	B	H	H	A	H	A	A
	A04	15157076	H	A	B	B	H	H	H	A	B	H	H	B	B	B	A	A	H	H	B	H	H	H	A	H	H	A	H	H	H	B	H	B	H	A	A	H	H	B	H	H	B	H	H	A	H	A	A
	A04	15159220	H	A	B	B	H	H	H	H	B	H	H	B	B	B	A	A	H	H	B	H	H	H	A	H	H	A	H	H	H	B	H	B	H	A	A	H	H	B	H	H	B	H	H	A	H	A	A
	A04	15159238	H	A	B	B	H	H	H	H	B	H	H	B	B	B	A	A	H	H	B	H	H	H	A	H	H	A	H	H	H	B	H	B	H	A	A	H	H	B	H	H	B	H	H	A	H	A	A
	A04	15159256	H	A	B	B	H	H	H	H	B	H	H	B	B	B	A	A	H	H	B	H	H	H	A	H	H	A	H	H	H	B	H	B	H	A	A	H	H	B	H	H	B	H	H	A	H	A	A
	A04	15434094	H	A	B	B	H	H	H	A	B	H	H	B	B	B	A	A	H	H	B	H	H	H	A	H	H	A	H	H	H	B	H	B	H	A	A	H	H	B	H	H	B	H	H	A	H	A	H
	A04	15434103	H	A	B	B	H	H	H	A	B	H	H	B	B	B	A	A	H	H	B	H	H	H	A	H	H	A	H	H	H	B	H	B	H	A	A	H	H	B	H	H	B	H	H	A	H	A	H
	A04	15434124	H	A	B	B	H	H	H	A	B	H	H	B	B	B	A	A	H	H	B	H	H	H	A	H	H	A	H	H	H	B	H	B	H	A	A	H	H	B	H	H	B	H	H	A	H	A	H
	A04	15434127	H	A	B	B	H	H	H	A	B	H	H	B	B	B	A	A	H	H	B	H	H	H	A	H	H	A	H	H	H	B	H	B	H	A	A	H	H	B	H	H	B	H	H	A	H	A	H
	A04	15434153	H	A	B	B	H	H	H	A	B	H	H	B	B	B	A	A	H	H	B	H	H	H	A	H	H	A	H	H	H	B	H	B	H	A	A	H	H	B	H	H	B	H	H	A	H	A	H
	A04	15434164	H	A	B	B	H	H	H	A	B	H	H	B	B	B	A	A	H	H	B	H	H	H	A	H	H	A	H	H	H	B	H	B	H	A	A	H	H	B	H	H	B	H	H	A	H	A	H
	A04	15434167	H	A	B	B	H	H	H	A	B	H	H	B	B	B	A	A	H	H	B	H	H	H	A	H	H	A	H	H	H	B	H	B	H	A	A	H	H	B	H	H	B	H	H	A	H	A	H
	A04	15434183	H	A	B	B	H	H	H	A	B	H	H	B	B	B	A	A	H	H	B	H	H	H	A	H	H	A	H	H	H	B	H	B	H	A	A	H	H	B	H	H	B	H	H	A	H	A	H
	A04	15434243	H	A	B	B	H	H	H	A	B	H	H	B	B	B	A	A	H	H	B	H	H	H	A	H	H	A	H	H	H	B	H	B	H	A	A	H	H	B	H	H	B	H	H	A	H	A	H
	A04	15434246	H	A	B	B	H	H	H	A	B	H	H	B	B	B	A	A	H	H	B	H	H	H	A	H	H	A	H	H	H	B	H	B	H	A	A	H	H	B	H	H	B	H	H	A	H	A	H
	A04	15435085	H	A	B	B	H	H	H	A	B	H	H	B	B	B	A	A	H	H	B	H	H	H	A	H	H	A	H	H	H	B	H	B	H	A	A	H	H	B	H	H	B	H	H	A	H	A	H
	A04	15480907	H	A	B	B	H	H	H	A	B	H	H	B	B	B	A	A	H	H	B	A	H	H	A	H	H	A	H	H	H	B	H	B	H	A	A	H	H	B	H	H	B	H	H	A	H	A	H
	A04	15627631	A	A	B	B	A	A	A	A	B	A	A	B	B	H	A	A	A	A	B	A	H	A	A	A	A	A	A	A	A	H	A	H	A	A	A	H	A	A	H	H	B	A	H	A	A	A	A
	A04	15627636	A	A	B	B	A	A	A	A	B	A	A	B	B	H	A	A	A	A	B	A	H	A	A	A	A	A	B	A	A	H	A	H	A	A	A	H	A	A	H	H	B	A	H	A	A	A	A
	A04	15627637	A	A	B	B	A	A	A	A	B	A	A	B	B	H	A	A	A	A	B	A	H	A	A	A	A	A	A	A	A	H	A	H	A	A	A	H	A	A	H	H	B	A	B	A	A	A	A
	A04	15627643	A	A	B	B	A	A	A	A	B	A	A	B	B	H	A	A	A	A	B	A	H	A	A	A	A	A	A	A	A	H	A	H	A	A	A	H	A	A	H	H	B	A	H	A	A	A	A
	A04	15627685	A	A	B	B	A	A	A	A	B	A	A	B	B	H	A	A	A	A	B	A	H	A	A	A	A	A	A	A	A	H	A	B	A	A	A	H	A	A	H	H	B	A	B	A	A	A	A
	A04	15628024	A	A	B	B	A	A	A	A	B	A	A	B	B	H	A	A	A	A	B	A	H	A	A	A	A	A	B	A	A	H	B	B	A	A	A	H	A	B	H	H	B	A	B	A	A	A	A
	A04	15628039	A	A	B	B	A	A	A	A	B	A	A	B	B	H	A	A	A	A	B	A	H	A	A	A	A	A	A	A	A	H	A	H	A	A	A	H	A	A	A	H	B	A	A	A	A	A	A
	A04	15628073	A	A	B	B	A	A	A	A	B	A	A	B	B	H	A	A	A	A	B	A	H	A	A	A	A	A	A	A	A	H	A	H	A	A	A	H	A	A	H	H	B	A	H	A	A	A	A
	A04	15815895	H	A	B	B	H	H	H	A	B	H	H	B	B	B	A	A	H	H	B	H	H	H	A	H	H	A	H	H	H	B	H	B	H	A	A	H	H	H	H	H	B	H	H	A	H	A	H
	A04	15816282	H	A	B	B	H	H	H	A	B	H	H	B	B	B	A	A	H	H	B	H	H	H	A	H	H	A	H	H	H	B	H	B	H	A	A	H	H	H	H	H	B	H	H	A	H	A	H
	A04	16011577	H	A	B	B	H	H	H	A	B	H	H	B	B	B	A	A	H	H	B	H	H	H	A	H	H	A	H	H	H	B	H	B	H	A	A	H	H	H	H	H	B	H	H	A	H	A	H
	A04	16011816	H	A	B	B	H	H	H	A	B	H	H	B	B	H	A	A	H	H	B	H	H	H	A	H	H	A	H	H	H	B	H	B	H	A	A	A	H	H	H	H	B	H	H	A	H	A	H
	A04	16062420	H	A	B	B	H	H	H	A	B	H	H	B	B	H	A	A	H	H	B	H	H	H	A	H	H	A	H	H	H	B	H	B	H	A	A	A	H	H	H	H	B	H	H	A	H	A	H
	A04	16117301	H	A	B	B	H	H	H	A	B	H	H	B	B	B	A	A	H	H	B	H	H	H	A	H	H	A	H	H	H	B	H	B	H	A	A	H	H	H	H	H	B	H	H	A	H	A	H
	A04	16607323	H	A	B	B	H	H	H	A	B	H	A	B	B	B	A	A	H	H	B	H	H	H	A	A	H	A	H	H	H	B	H	B	H	A	A	H	H	H	H	H	B	H	H	H	H	A	H
	A04	16610594	H	A	B	B	H	H	H	A	B	H	A	B	B	B	A	A	H	H	B	H	H	H	A	A	H	A	H	H	H	B	H	B	H	A	A	H	H	H	H	H	B	H	H	H	H	A	H
	A04	16649425	H	A	B	B	H	H	H	A	B	H	A	B	B	B	A	A	H	H	B	H	H	H	A	A	H	A	H	H	H	B	H	B	H	A	A	H	H	H	H	H	B	H	H	H	H	A	H
	A04	16649452	H	A	B	B	H	H	H	A	B	H	A	B	B	B	A	A	H	H	B	H	H	H	A	A	H	A	H	H	H	B	H	B	H	A	A	H	H	H	H	H	B	H	H	H	H	A	H
	A04	16833883	H	A	B	B	H	H	H	A	B	H	A	B	B	B	A	A	H	H	B	H	H	H	A	A	H	A	H	H	A	B	H	B	H	A	A	H	H	H	H	H	B	H	H	H	H	A	H
	A04	16834092	H	A	B	B	H	H	H	A	B	H	A	B	B	B	A	A	H	H	B	H	H	H	A	A	H	A	H	H	A	B	H	B	H	A	A	H	H	H	H	H	B	H	H	H	H	A	H
	A04	16834093	H	A	B	B	H	H	H	A	B	H	A	B	B	B	A	A	H	H	B	H	H	H	A	A	H	A	H	H	A	B	H	B	H	A	A	H	H	H	H	H	B	H	H	H	H	A	H
	A04	16834095	H	A	B	B	H	H	H	A	B	H	A	B	B	B	A	A	H	H	B	H	H	H	A	A	H	A	H	H	A	B	H	B	H	A	A	H	H	H	H	H	B	H	H	H	H	A	H
	A04	16834149	H	A	B	B	H	H	H	A	B	H	A	B	B	B	A	A	H	H	B	H	H	H	A	A	H	A	H	H	A	B	H	B	H	A	A	H	H	H	H	H	B	H	H	H	H	A	H
	A04	16988419	H	A	B	B	H	H	H	A	B	H	A	B	B	B	A	A	H	H	B	H	H	A	A	A	H	A	H	H	A	B	H	B	H	A	A	H	H	H	H	H	B	H	H	H	H	A	H
	A04	16988422	H	A	B	B	H	H	H	A	B	H	A	B	B	B	A	A	H	H	B	H	H	A	A	A	H	A	H	H	A	B	H	B	H	A	A	H	H	H	H	H	B	H	H	H	H	A	H
	A04	17104501	H	A	B	B	H	H	H	A	B	H	A	B	B	B	A	A	H	H	B	H	H	A	A	A	H	A	H	H	A	B	H	B	H	A	A	H	H	H	H	H	B	H	H	H	H	A	H
	A04	17104509	H	A	B	B	H	H	H	A	B	H	A	B	B	B	A	A	H	H	B	H	H	A	A	A	H	A	H	H	A	B	H	B	H	A	A	H	H	H	H	H	B	H	H	H	H	A	H
	A04	17104522	H	A	B	B	H	H	H	A	B	H	A	B	B	B	A	A	H	H	B	H	H	A	A	A	H	A	H	H	A	B	H	B	H	A	A	H	H	H	H	H	B	H	H	H	H	A	H
	A04	17300982	H	A	B	B	H	H	H	H	B	H	A	B	B	B	A	A	H	H	B	H	H	A	A	A	H	A	H	H	A	B	H	B	H	A	A	H	H	H	H	H	B	H	H	H	H	A	H
	A04	17329752	B	A	B	B	B	B	B	A	B	B	A	B	B	B	A	A	B	B	B	B	B	A	A	A	B	A	B	B	A	B	B	B	B	A	A	B	B	B	B	B	B	B	B	B	B	A	B
	A04	17329775	B	A	B	B	B	B	B	A	B	B	A	B	B	B	A	A	B	B	B	B	B	A	A	A	B	A	B	B	A	B	B	B	B	A	A	B	B	B	B	B	B	B	B	B	B	A	B
	A04	17329776	B	A	B	B	B	B	B	A	B	B	A	B	B	B	A	A	B	B	B	B	B	A	A	A	B	A	B	B	A	B	B	B	B	A	A	B	B	B	B	B	B	B	B	B	B	A	B
	A04	17329781	H	A	B	B	B	B	B	A	B	B	A	B	B	B	A	A	B	B	B	B	B	A	A	A	B	A	B	B	A	B	B	B	B	A	A	B	B	B	B	B	B	B	B	B	B	A	B
	A04	17723207	H	A	B	B	H	H	H	A	B	H	A	B	B	B	A	A	H	A	B	H	H	A	A	A	H	A	H	H	A	B	H	B	H	A	A	H	B	H	H	H	B	H	H	H	A	A	H
	A04	17723267	H	A	B	B	H	H	H	A	B	H	A	B	B	B	A	A	H	A	B	H	H	A	A	A	H	A	H	H	A	B	H	B	H	A	A	H	B	H	H	H	B	H	H	H	A	A	H
	A04	17723421	H	A	B	B	H	H	H	A	B	H	A	B	B	B	A	A	H	A	B	H	H	A	A	A	H	A	H	H	A	B	H	B	H	A	A	H	B	H	H	H	B	H	H	H	A	A	H
	A04	17723438	H	A	B	B	H	H	H	A	B	H	A	B	B	B	A	A	H	A	B	H	H	A	A	A	H	A	H	H	A	B	H	B	H	A	A	H	B	H	H	H	B	H	H	H	A	A	H
	A04	17723452	H	A	B	B	H	H	H	A	B	H	A	B	B	B	A	A	H	A	B	H	H	A	A	A	H	A	H	H	A	B	H	B	H	A	A	H	B	H	H	H	B	H	H	H	A	A	H
	A04	17723455	H	A	B	B	H	H	H	A	B	H	A	B	B	B	A	A	H	A	B	H	H	A	A	A	H	A	H	H	A	B	H	B	H	A	A	H	B	H	H	H	B	H	H	H	A	A	H
	A04	17723461	H	A	B	B	H	H	H	A	B	H	A	B	B	B	A	A	H	A	B	H	H	A	A	A	H	A	H	H	A	B	H	B	H	A	A	H	B	H	H	H	B	H	H	H	A	A	H
	A04	17844258	H	A	B	B	H	H	H	A	B	H	A	B	B	B	A	A	H	A	B	H	H	A	A	A	H	A	H	H	A	B	H	B	H	A	A	H	B	H	H	H	B	H	H	H	A	A	H
	A04	17848742	H	A	B	B	B	H	H	A	B	H	A	B	B	B	A	A	H	A	B	H	H	A	A	A	H	A	H	H	A	B	H	B	H	A	A	H	B	H	H	H	B	H	H	H	A	A	H
	A04	18033308	B	A	B	B	B	H	H	A	B	H	A	B	B	B	A	A	H	A	B	H	H	A	A	A	H	A	H	H	A	H	H	B	H	A	A	H	B	H	H	H	B	H	A	H	A	A	H
	A04	18127844	B	A	B	H	B	H	H	A	B	H	A	B	B	B	H	A	H	A	B	H	H	A	A	A	H	A	H	H	A	B	H	B	H	A	A	H	B	H	H	H	B	H	A	H	A	A	H
	A04	18128024	B	A	B	H	B	H	H	A	B	H	A	B	B	B	H	A	H	A	B	H	H	A	A	A	H	A	H	H	A	B	H	B	H	A	A	H	B	H	H	H	B	H	A	H	A	A	H
	A04	18128062	B	A	B	H	B	H	H	A	B	H	A	B	B	B	H	A	H	A	B	H	H	A	A	A	H	A	H	H	A	B	H	B	H	A	A	H	B	H	H	H	B	H	A	H	A	A	H
	A04	18218403	B	A	B	H	B	H	H	A	B	H	A	B	B	B	A	A	H	A	B	H	H	A	A	A	H	A	H	H	A	B	H	H	H	A	A	H	B	H	H	H	B	A	A	H	A	A	H
	A04	18258897	B	A	B	H	B	H	H	H	B	H	A	B	B	B	A	A	H	A	B	H	H	A	A	A	H	A	H	H	A	B	H	B	H	A	A	H	B	H	H	H	B	H	A	H	A	A	H
	A04	18258917	B	A	B	H	B	H	H	H	B	H	A	B	B	B	A	A	H	A	B	H	H	A	A	A	H	A	H	H	A	B	H	B	H	A	A	H	B	H	H	H	B	H	A	H	A	A	H
	A04	18258966	B	A	B	H	B	H	H	H	B	H	A	B	B	B	A	A	H	A	B	H	H	A	A	A	H	A	H	H	A	B	H	B	H	A	A	H	B	H	H	H	B	H	A	H	A	A	H
	A04	18259041	B	A	B	H	B	H	H	H	B	H	A	B	B	B	A	A	H	A	B	H	H	A	A	A	H	A	H	H	A	B	H	B	H	A	A	H	B	H	H	H	B	H	A	H	A	A	H
	A04	18259086	B	A	B	H	B	H	H	H	B	H	A	B	B	B	A	A	H	A	B	H	H	A	A	A	H	A	H	H	A	B	H	B	H	A	A	H	B	H	H	H	B	H	A	H	A	A	H
	A04	18398025	B	A	B	H	B	H	H	H	B	H	A	B	B	B	A	A	H	A	B	H	H	A	A	A	H	A	H	H	A	B	H	B	H	A	A	H	B	H	H	H	B	H	A	H	A	A	H
	A04	18398225	B	A	B	H	H	H	H	H	B	H	A	B	B	B	A	A	H	A	B	H	H	A	A	A	H	A	H	H	A	B	H	B	H	A	A	H	B	H	H	H	B	H	A	H	A	A	H
	A04	18398249	B	A	B	H	H	H	H	H	B	H	A	B	B	B	A	A	H	A	B	H	H	A	A	A	H	A	H	H	A	B	H	B	H	A	A	H	B	H	H	H	B	H	A	H	A	A	H
	A04	18429570	B	A	B	H	B	H	H	H	B	H	A	B	B	B	A	A	H	A	B	H	H	A	A	A	H	A	H	H	A	B	H	B	H	A	A	H	B	H	H	H	B	H	A	H	A	A	H
	A04	18429585	B	A	B	H	B	H	H	H	B	H	A	B	B	B	A	A	H	A	B	H	H	A	A	A	H	A	H	H	A	B	H	B	H	A	A	H	B	H	H	H	B	H	A	H	A	A	H
	A04	18502670	B	A	B	B	B	B	B	H	B	B	A	B	B	B	A	A	B	A	B	H	H	A	A	A	H	A	B	B	A	B	B	B	B	A	A	H	B	H	H	B	B	B	A	B	A	A	H
	A04	18502672	B	A	B	B	B	B	B	H	B	B	A	B	B	B	A	A	B	A	B	H	H	A	A	A	H	A	B	B	A	B	B	B	B	A	A	H	B	H	H	B	B	B	A	B	A	A	H
	A04	18502695	B	A	B	B	B	B	B	H	B	B	A	B	B	B	A	A	B	A	B	H	H	A	A	A	H	A	B	B	A	B	B	B	B	A	A	H	B	H	H	B	B	B	A	B	A	A	B
	A04	18502773	B	A	B	B	B	B	B	H	B	B	A	B	B	B	A	A	B	A	B	H	H	A	A	A	H	A	B	B	A	B	B	B	B	A	A	H	B	H	H	B	B	B	A	B	A	A	B
	A04	18502791	B	A	B	B	B	B	B	H	B	B	A	B	B	B	A	A	B	A	B	H	H	A	A	A	H	A	B	B	A	B	B	B	B	A	A	H	B	H	H	B	B	B	A	B	A	A	H
	A04	18502835	B	A	B	B	B	B	B	H	B	B	A	B	B	B	A	A	B	A	B	H	H	A	A	A	H	A	B	H	A	B	B	B	B	A	A	H	B	H	H	B	B	H	A	B	A	A	H
	A04	18502837	B	A	B	B	B	B	B	H	B	B	A	B	B	B	A	A	B	A	B	H	H	A	A	A	H	A	B	B	A	B	B	B	B	A	A	H	B	H	H	B	B	B	A	B	A	A	B
	A05	255543	H	H	H	H	H	B	H	B	A	H	B	B	H	H	H	B	H	A	H	H	H	H	B	H	H	B	H	A	H	B	H	H	H	A	H	B	H	B	B	H	B	H	A	A	H	H	H
	A05	301916	H	H	H	H	H	B	H	B	A	H	B	B	H	H	H	B	H	A	H	H	H	H	B	H	H	B	H	A	H	B	H	H	H	A	H	B	H	B	B	H	B	H	A	A	H	H	H
	A05	301935	H	H	H	H	H	B	H	B	A	H	B	B	H	H	H	B	H	A	H	H	H	H	B	H	H	B	H	A	H	B	H	H	H	A	H	B	H	B	B	H	B	H	A	A	H	H	H
	A05	301967	H	H	H	H	H	B	H	B	A	H	B	B	H	H	H	B	H	A	H	H	H	H	B	H	H	B	H	A	H	B	H	H	H	A	H	B	H	B	B	H	B	H	A	A	H	H	H
	A05	301974	H	H	H	H	H	B	H	B	A	H	B	B	H	H	H	B	H	A	H	H	H	H	B	H	H	B	H	A	H	B	H	H	H	A	H	B	H	B	B	H	B	H	A	A	H	H	H
	A05	355660	H	H	H	H	H	B	H	B	A	H	B	B	H	H	H	B	H	A	H	H	H	H	B	H	H	B	H	A	H	B	H	H	H	A	H	B	H	B	B	H	B	H	A	A	H	H	H
	A05	355690	H	H	H	H	H	B	H	B	A	H	B	B	H	H	H	B	H	A	H	H	H	H	B	H	H	B	H	A	H	B	H	H	H	A	H	B	H	B	B	H	B	H	A	A	H	H	H
	A05	355699	H	H	H	H	H	B	H	B	A	H	B	B	H	H	H	B	H	A	H	H	H	H	B	H	H	B	H	A	H	B	H	H	H	A	H	B	H	B	B	H	B	H	A	A	H	H	H
	A05	355700	H	H	H	H	H	B	H	B	A	H	B	B	H	H	H	B	H	A	H	H	H	H	B	H	H	B	H	A	H	B	H	H	H	A	H	B	H	B	B	H	B	H	A	A	H	H	H
	A05	355702	H	H	H	H	H	B	H	B	A	H	B	B	H	H	H	B	H	A	H	H	H	H	B	H	H	B	H	A	H	B	H	H	H	A	H	B	H	B	B	H	B	H	A	A	H	H	H
	A05	450342	H	H	H	H	H	B	H	B	A	H	B	B	H	H	H	B	H	A	H	H	H	H	B	H	H	B	H	A	H	B	H	H	H	A	H	B	H	B	B	H	H	H	A	A	H	H	H
	A05	450364	H	H	H	H	H	B	H	B	A	H	B	B	H	H	H	B	H	A	H	H	H	H	B	H	H	B	H	A	H	B	H	H	H	A	H	B	H	B	B	H	H	H	A	A	H	H	H
	A05	450368	H	H	H	H	H	B	H	B	A	H	B	B	H	H	H	B	H	A	H	H	H	H	B	H	H	B	H	A	H	B	H	H	H	A	H	B	H	B	B	H	H	H	A	A	H	H	H
	A05	501851	H	H	H	H	H	H	H	B	A	A	H	B	H	H	H	B	H	A	H	H	H	H	H	A	H	B	H	A	H	B	H	H	H	A	H	B	H	B	B	H	H	H	A	A	H	H	H
	A05	611885	H	H	H	H	H	B	H	B	A	H	H	B	H	H	B	B	H	A	H	H	H	H	B	H	H	B	H	A	B	B	H	H	H	A	H	B	H	B	B	H	H	H	A	A	H	H	H
	A05	611896	H	H	H	H	H	B	H	B	A	H	H	B	H	H	B	B	H	A	H	H	H	H	B	H	H	B	H	A	B	B	H	H	H	A	H	B	H	B	B	H	H	H	A	A	H	H	H
	A05	611920	H	H	H	H	H	B	H	B	A	H	H	B	H	H	B	B	H	A	H	H	H	H	B	H	H	B	B	A	B	B	H	H	H	A	H	B	H	B	B	H	H	H	A	A	H	H	H
	A05	612313	H	H	H	H	H	B	H	B	A	H	H	B	H	H	B	B	H	A	H	H	H	H	B	H	H	B	H	A	B	B	H	H	H	A	H	B	H	B	B	H	H	H	A	A	H	H	H
	A05	612319	H	H	H	H	H	B	H	B	A	H	H	B	H	H	B	B	H	A	H	H	H	H	B	H	H	B	H	A	B	B	H	H	H	A	H	B	H	B	B	H	H	H	A	A	H	H	H
	A05	612331	H	H	H	H	H	B	H	B	A	H	H	B	H	H	B	B	H	A	H	H	H	H	B	H	H	B	H	A	B	B	H	H	H	A	H	B	H	B	B	H	H	H	A	A	H	H	H
	A05	672230	H	H	H	H	H	B	H	B	A	B	B	B	H	H	H	B	B	A	H	H	H	H	B	H	H	B	B	A	B	B	H	H	H	A	H	B	H	B	B	H	H	H	A	A	H	H	H
	A05	672345	H	H	H	H	H	B	H	B	A	B	B	B	H	H	H	B	B	A	H	H	H	H	B	H	H	B	H	A	B	B	H	H	H	A	H	B	H	B	B	H	H	H	A	A	H	H	H
	A05	963117	H	H	H	H	H	B	H	B	A	H	H	B	H	B	B	B	H	A	H	H	H	H	B	H	H	B	H	A	B	B	H	H	H	H	H	B	H	B	B	H	H	H	H	H	H	H	H
	A05	963132	H	H	H	H	H	B	H	B	A	H	H	B	H	B	B	B	H	A	H	H	H	H	B	H	H	B	H	A	B	B	H	H	H	H	H	B	H	B	B	H	H	H	H	H	H	H	H
	A05	963144	H	H	H	H	H	B	H	B	A	H	H	B	H	B	B	B	H	A	H	H	H	H	B	H	H	B	H	A	B	B	H	H	H	H	H	B	H	B	B	H	H	H	H	H	H	H	H
	A05	963150	H	H	H	H	H	B	H	B	A	H	H	B	H	B	B	B	H	A	H	H	H	H	B	H	H	B	H	A	B	B	H	H	H	H	H	B	H	B	B	H	H	H	H	H	H	H	H
	A05	1191800	H	H	H	H	A	B	H	B	A	H	H	B	H	B	H	B	H	A	H	H	H	H	B	H	H	H	H	A	B	B	H	H	A	H	H	B	H	B	B	H	H	H	H	H	H	H	H
	A05	1191809	H	H	H	H	A	B	H	B	A	H	H	B	H	B	H	B	H	A	H	H	H	H	B	H	H	H	H	A	B	B	H	H	A	H	H	B	H	B	B	H	H	H	H	H	H	H	H
	A05	1192036	H	H	H	H	A	B	H	B	A	H	H	B	H	B	H	B	H	A	H	H	H	H	B	H	H	H	H	A	B	B	H	H	A	H	H	B	H	B	B	H	H	H	H	H	H	H	H
	A05	1192039	H	H	H	H	A	B	H	B	A	H	H	B	H	B	H	B	H	A	H	H	H	H	B	H	H	H	H	A	B	B	H	H	A	H	H	B	H	B	B	H	H	H	H	H	H	H	H
	A05	1192043	H	H	H	H	A	B	H	B	A	H	H	B	H	B	H	B	H	A	H	H	H	H	B	H	H	H	H	A	B	B	H	H	A	H	H	B	H	B	B	H	H	H	H	H	H	H	H
	A05	1346281	H	H	H	H	H	B	H	B	A	H	H	B	H	B	H	B	H	A	H	H	H	H	B	H	H	H	H	H	B	B	H	H	A	H	H	B	H	B	B	H	H	H	H	H	H	H	H
	A05	1346291	H	H	H	H	H	B	H	B	A	H	H	B	H	B	H	B	H	A	H	H	H	H	B	H	H	H	H	H	B	B	H	H	A	H	H	B	H	B	B	H	H	H	H	H	H	H	H
	A05	1346325	H	H	H	H	H	B	H	B	A	H	H	B	H	B	H	B	H	A	H	H	H	H	B	H	H	H	H	H	B	B	H	H	A	H	H	B	H	B	B	H	H	H	H	H	H	H	H
	A05	1346333	H	H	H	H	H	B	H	B	A	H	H	B	H	B	H	B	H	A	H	H	H	H	B	H	H	H	H	H	B	B	H	H	A	H	H	B	H	B	B	H	H	H	H	H	H	H	H
	A05	1346420	H	H	H	H	H	B	H	B	A	H	H	B	H	B	H	B	H	A	H	H	H	H	B	H	H	H	H	H	B	B	H	H	A	H	H	B	H	B	B	H	H	H	H	H	H	H	H
	A05	1349939	H	H	H	A	H	B	H	H	A	H	B	B	H	B	H	B	H	A	H	H	H	H	B	H	H	B	B	H	B	B	H	H	A	H	H	B	H	B	B	H	H	H	H	H	H	H	H
	A05	1349948	H	H	H	A	H	B	H	H	A	H	B	B	H	B	H	H	H	A	H	H	H	H	B	H	H	B	B	H	B	B	H	H	A	H	H	B	H	B	B	H	H	H	H	H	H	H	H
	A05	1349974	H	H	H	A	H	B	H	H	A	H	B	B	H	B	H	H	H	A	H	H	H	H	B	H	H	B	B	H	B	B	H	H	A	H	H	B	H	B	B	H	H	H	H	H	H	H	H
	A05	1349995	H	H	H	A	H	B	H	H	A	H	B	B	H	B	H	H	H	A	H	H	H	H	B	H	H	B	B	H	B	B	H	H	A	H	H	B	H	B	B	H	H	H	H	H	H	H	H
	A05	1350014	H	H	H	A	H	B	H	H	A	H	B	B	H	B	H	H	H	A	H	H	H	H	B	H	H	B	B	H	B	B	H	H	A	H	H	B	H	B	B	H	H	H	H	H	H	H	H
	A05	1371307	H	H	H	H	H	B	H	B	A	H	H	B	H	B	H	B	H	A	H	H	H	H	B	H	H	A	H	H	B	B	H	H	A	H	H	B	H	B	B	H	H	H	H	H	H	H	H
	A05	1371325	H	H	H	H	H	B	H	B	A	H	H	B	H	B	H	B	H	A	H	H	H	H	B	H	H	A	H	H	B	B	H	H	A	H	H	B	H	B	B	H	H	H	H	H	H	H	H
	A05	1371347	H	H	H	H	H	B	H	B	A	H	H	B	H	B	H	B	H	A	H	H	H	H	B	H	H	A	H	H	B	B	H	H	A	H	H	B	H	B	B	H	H	H	H	H	H	H	H
	A05	1674936	H	H	H	H	H	B	H	B	A	H	H	B	H	B	H	B	H	A	H	H	H	H	B	H	H	H	H	H	B	B	H	H	A	H	H	B	H	B	B	H	H	H	H	H	H	H	H
	A05	1798406	H	H	H	H	H	B	H	B	A	H	B	B	H	B	H	B	H	A	H	H	H	H	B	H	H	H	H	H	B	B	H	B	A	H	H	B	H	B	B	H	H	H	H	H	H	H	H
	A05	1798413	H	H	H	H	H	B	H	B	A	H	B	B	H	B	H	B	H	A	H	H	H	H	B	H	H	H	H	H	B	B	H	B	A	H	H	B	H	B	B	H	H	H	H	H	H	H	H
	A05	1798430	H	H	H	H	H	B	H	B	A	H	B	B	H	B	H	B	H	A	H	H	H	H	B	H	H	H	H	H	B	B	H	B	A	H	H	B	H	B	B	H	H	H	H	H	H	H	H
	A05	1798506	H	H	H	H	H	B	H	B	A	H	B	B	H	B	H	B	H	A	H	H	H	H	B	H	H	H	H	H	B	B	H	B	A	H	H	B	H	B	B	H	H	H	H	H	H	H	H
	A05	1860198	H	H	H	H	H	B	H	B	A	H	H	B	H	B	H	B	H	A	H	H	H	H	B	H	H	H	H	H	B	B	H	H	A	H	H	B	H	B	B	H	A	H	H	H	H	H	H
	A05	1948556	H	H	H	H	H	B	H	B	A	H	H	H	H	B	H	B	H	A	H	H	H	B	B	H	H	H	H	H	B	B	H	H	A	H	H	B	H	B	B	H	B	H	B	H	H	H	H
	A05	1962189	H	A	H	H	H	B	H	B	A	H	H	B	H	B	H	B	H	A	H	H	H	H	B	H	H	H	H	H	H	B	H	H	A	H	H	B	H	B	B	H	H	H	H	H	H	H	H
	A05	1962242	H	A	H	H	H	B	H	B	A	H	H	B	H	B	H	B	H	A	H	H	H	H	B	H	H	H	H	H	H	B	H	H	A	H	H	B	H	B	B	H	H	H	H	H	H	H	H
	A05	1975148	H	H	H	H	H	B	H	B	A	H	H	H	H	B	H	B	H	A	H	H	H	H	B	H	H	H	H	H	B	B	H	H	A	H	H	B	H	B	B	H	H	H	H	H	H	H	H
	A05	1975202	H	H	H	H	H	B	H	B	A	H	H	H	H	B	H	B	H	A	H	H	H	H	B	H	H	H	H	H	B	B	H	H	A	H	H	B	H	B	B	H	H	H	H	H	H	H	H
	A05	1975218	H	H	H	H	H	B	H	B	A	H	H	H	H	B	H	B	H	A	H	H	H	H	B	H	H	H	H	H	B	B	H	H	A	H	H	B	H	B	B	H	H	H	H	H	H	H	H
	A05	2011214	H	H	H	H	H	B	B	B	A	H	H	H	H	B	H	B	H	A	A	H	H	H	H	H	H	H	H	H	B	B	H	H	A	H	H	B	H	B	B	H	H	H	H	H	H	H	H
	A05	2011573	H	H	H	H	H	B	H	B	A	H	H	H	H	B	H	B	H	A	H	H	H	H	B	H	H	H	H	H	B	B	H	H	A	H	H	B	H	B	B	H	H	H	H	H	H	H	H
	A05	2117649	H	H	H	H	H	B	H	B	A	H	H	H	H	B	H	B	H	A	H	H	H	H	B	H	H	H	H	H	B	B	H	H	A	H	H	B	H	H	B	H	H	H	H	H	H	H	H
	A05	2117660	H	H	H	H	H	B	H	B	A	H	H	H	H	B	H	B	H	A	H	H	H	H	B	H	H	H	H	H	B	B	H	H	A	H	H	B	H	H	B	H	H	H	H	H	H	H	H
	A05	2217349	A	A	H	H	A	A	H	H	A	H	H	H	H	H	H	A	A	A	H	B	H	H	H	A	H	A	A	H	A	H	A	A	A	H	A	H	H	A	H	A	H	H	A	H	H	H	H
	A05	2300099	H	H	H	H	H	B	H	B	A	H	H	H	H	B	H	B	H	A	H	H	H	H	B	H	H	H	H	H	B	B	A	H	A	H	H	B	H	H	B	H	H	H	H	H	H	H	H
	A05	2646131	H	H	H	H	H	B	H	B	A	H	H	H	H	B	H	B	H	A	H	B	H	H	B	H	H	H	H	H	B	B	A	H	A	H	H	B	H	H	B	H	H	H	H	H	H	H	H
	A05	2646132	H	H	H	H	H	B	H	B	A	H	H	H	H	B	H	B	H	A	H	B	H	H	B	H	H	H	H	H	B	B	A	H	A	H	H	B	H	H	B	H	H	H	H	H	H	H	H
	A05	2854085	H	H	H	H	H	B	H	B	A	H	H	H	H	B	H	H	H	A	H	B	H	H	B	H	H	H	H	H	B	B	A	H	A	H	H	B	H	H	B	H	H	H	H	H	H	H	H
	A05	2854087	H	H	H	H	H	B	H	B	A	H	H	H	H	B	H	H	H	A	H	B	H	H	B	H	H	H	H	H	B	B	A	H	A	H	H	B	H	H	B	H	H	H	H	H	H	H	H
	A05	2922983	H	H	H	H	H	B	H	B	A	H	H	H	H	B	H	H	H	A	H	B	H	H	B	H	H	H	H	H	B	B	A	H	A	H	H	B	H	A	B	H	H	H	H	H	H	H	H
	A05	2923000	H	H	H	H	H	B	H	B	A	H	H	H	H	B	H	H	H	A	H	B	H	H	B	H	H	H	H	H	B	B	A	H	A	H	H	B	H	A	B	H	H	H	H	H	H	H	H
	A05	3060683	A	H	H	H	H	B	H	B	A	H	H	H	H	B	A	H	H	A	H	B	H	B	B	H	H	H	H	H	B	B	A	H	A	B	H	B	H	A	B	H	H	H	H	H	H	H	H
	A05	3060712	A	H	H	H	H	B	H	B	A	H	H	H	H	B	A	H	H	A	H	B	H	B	B	H	H	H	H	H	B	B	A	H	A	B	H	B	H	A	B	H	H	H	H	H	H	H	H
	A05	3061150	A	H	H	H	H	B	H	B	A	H	H	H	H	B	A	H	H	A	H	B	H	B	B	H	H	H	H	H	B	B	A	H	A	B	H	B	H	A	B	H	H	H	H	H	H	H	H
	A05	3360512	H	B	H	H	H	B	H	B	H	H	H	H	H	B	H	A	H	A	H	B	H	B	B	H	H	H	H	H	B	B	A	H	A	B	H	B	H	H	B	H	H	H	H	H	H	H	H
	A05	3360518	H	B	H	H	H	B	H	B	H	H	H	H	H	B	H	A	H	A	H	B	H	B	B	H	H	H	H	H	B	B	A	H	A	B	H	B	H	H	B	H	H	H	H	H	H	B	H
	A05	3466972	H	B	H	H	H	H	H	B	H	H	B	H	H	B	H	A	B	A	H	B	H	B	B	H	A	H	H	H	B	B	A	A	A	B	H	B	H	A	B	H	H	H	H	H	H	H	H
	A05	3487359	H	B	H	H	H	B	H	B	H	H	H	H	H	B	H	A	H	A	H	B	H	B	B	H	H	H	H	H	B	B	H	A	A	B	H	B	H	A	B	H	H	H	H	H	H	H	H
	A05	3487727	H	B	H	H	H	B	H	H	H	H	H	H	H	B	H	A	H	A	H	B	H	B	B	H	H	H	H	H	B	B	H	A	A	B	H	B	H	A	B	H	H	H	H	H	H	H	H
	A05	3635357	B	B	H	H	H	B	H	B	H	B	H	H	H	B	H	A	H	A	H	B	H	B	B	H	H	H	B	H	B	B	H	A	A	B	H	B	H	A	B	A	H	H	H	B	H	B	B
	A05	3635504	B	B	H	H	H	B	H	B	H	B	H	H	H	B	H	A	H	A	H	B	H	B	B	B	H	H	B	H	B	B	H	A	A	B	H	B	H	A	B	A	H	H	H	B	H	B	B
	A05	3635513	B	B	H	H	H	B	H	B	H	B	H	H	H	B	H	A	H	A	H	B	H	B	B	H	H	H	B	H	B	B	H	A	A	B	H	B	H	A	B	A	H	H	H	B	H	B	B
	A05	3635517	B	B	H	H	H	B	H	B	H	B	H	H	H	B	H	A	H	A	B	B	H	B	B	H	H	H	B	H	B	B	H	A	A	B	H	B	H	A	B	A	H	H	H	B	H	B	B
	A05	3635525	B	B	H	H	H	B	H	B	H	B	H	H	H	B	H	A	H	A	H	B	H	B	B	H	H	H	B	H	B	B	H	A	A	B	H	B	H	A	B	A	H	H	H	B	H	B	B
	A05	3635543	B	B	H	H	H	B	H	B	H	B	H	H	H	B	H	A	H	A	H	B	H	B	B	B	H	H	B	H	B	B	H	A	A	B	H	B	H	A	B	A	H	H	H	B	H	B	B
	A05	3635547	B	B	H	H	H	B	H	B	H	B	H	H	H	B	H	A	H	A	B	B	H	B	B	B	H	H	B	H	B	B	H	A	A	B	H	B	H	A	B	A	H	H	H	B	H	B	B
	A05	3635562	B	B	H	H	H	B	H	B	H	B	H	H	H	B	H	A	H	A	B	B	H	B	B	H	H	H	B	H	B	B	H	A	A	B	H	B	H	A	B	A	H	H	H	B	H	B	B
	A05	3702659	H	B	H	H	H	B	H	B	H	H	H	H	H	B	H	A	H	A	H	B	H	B	B	H	H	H	H	H	B	B	A	A	A	B	H	B	H	A	B	A	H	H	H	H	H	H	H
	A05	3702768	H	B	H	H	H	B	H	B	H	H	H	H	H	B	H	A	H	A	H	B	H	B	B	H	H	H	H	H	B	B	A	A	A	B	H	B	H	A	B	A	H	H	H	H	H	H	H
	A05	3799380	H	B	H	H	H	B	H	B	H	A	H	H	H	B	H	A	H	A	H	B	H	B	B	H	H	H	A	H	B	B	A	A	A	B	H	B	H	A	B	A	H	H	H	H	H	H	H
	A05	4230486	H	B	H	H	H	B	H	B	H	A	H	H	H	B	H	A	H	A	H	B	H	B	B	H	H	H	A	H	B	B	A	A	A	B	H	B	H	A	H	A	H	H	H	H	H	H	H
	A05	4230519	H	B	H	H	H	B	H	B	H	A	H	H	H	B	H	A	H	A	H	B	H	B	B	H	H	H	A	H	B	B	A	A	A	B	H	B	H	A	H	A	H	H	H	H	H	H	H
	A05	4232785	H	B	H	H	H	B	H	B	H	A	H	H	H	B	H	A	H	A	H	B	H	B	B	H	H	H	A	H	B	B	A	A	A	B	H	B	H	A	H	A	H	H	H	H	H	H	H
	A05	4232791	H	B	H	H	H	B	H	B	H	A	H	H	H	B	H	A	H	A	H	B	H	B	B	H	H	H	A	H	B	B	A	A	A	B	H	B	H	A	H	A	H	H	H	H	H	H	H
	A05	4353454	H	B	H	H	H	B	H	B	H	A	H	H	H	B	H	A	H	A	H	B	H	B	B	H	H	H	A	H	B	B	A	A	A	B	H	B	H	A	H	A	H	H	H	H	H	H	H
	A05	4537704	H	B	H	H	H	B	H	B	H	A	H	H	H	B	H	H	H	A	H	B	H	B	B	H	H	H	A	H	B	B	A	A	A	B	H	B	H	A	H	A	H	H	H	H	H	H	H
	A05	4537705	H	B	H	H	H	B	H	B	H	A	H	H	H	B	H	A	H	A	H	B	H	B	B	H	H	H	A	H	B	B	A	A	A	B	H	B	H	A	H	A	H	H	H	H	H	H	H
	A05	4693107	H	B	H	H	H	B	H	B	H	A	H	H	H	B	H	A	H	A	H	B	H	B	B	H	H	H	A	H	B	B	A	A	A	B	H	B	H	A	H	H	H	H	H	H	H	H	H
	A05	4796536	H	B	H	H	H	B	H	B	H	A	H	H	H	B	H	A	H	A	H	B	H	B	B	H	H	H	A	H	B	B	A	A	A	B	H	B	H	A	H	A	H	H	H	H	H	H	H
	A05	4849234	H	B	H	H	H	B	H	B	H	A	H	H	H	B	H	A	H	A	H	B	H	B	B	H	H	H	A	H	B	B	A	A	A	B	H	B	H	A	H	A	H	H	H	H	H	H	H
	A05	5055972	H	B	H	H	H	B	H	B	H	A	H	H	A	B	H	A	H	A	H	B	H	B	B	H	H	H	A	H	B	B	A	A	A	B	H	B	H	A	H	A	H	H	H	H	H	H	H
	A05	5056419	H	B	H	H	H	B	H	B	H	A	H	H	A	B	H	A	H	A	H	B	H	B	B	H	H	H	A	H	B	B	A	A	A	B	H	B	H	A	H	A	H	H	H	H	H	H	H
	A05	5056421	H	B	H	H	H	B	H	B	H	A	H	H	A	B	H	A	H	A	H	B	H	B	B	H	H	H	A	H	B	B	A	A	A	B	H	B	H	A	H	A	H	H	H	H	H	H	H
	A05	5057739	H	B	H	H	H	B	H	B	H	A	H	H	A	B	H	A	H	A	H	B	H	B	B	H	H	H	A	H	B	B	A	A	A	B	H	B	H	A	H	A	H	H	H	H	H	H	H
	A05	5091902	H	B	H	H	H	B	H	B	H	A	H	H	A	B	H	A	H	A	H	B	H	B	B	H	H	H	A	H	B	B	A	A	A	B	H	B	H	A	H	A	H	H	H	H	H	H	H
	A05	5092160	H	B	H	H	H	B	H	B	H	A	H	H	A	B	H	A	H	A	H	B	H	B	B	H	H	H	A	H	B	B	A	A	A	B	H	B	H	A	H	A	H	H	H	H	H	H	H
	A05	5274688	H	B	H	H	H	B	H	B	H	A	H	H	A	B	H	H	H	A	H	B	H	B	B	H	H	H	A	H	B	B	A	A	A	B	H	B	H	A	H	A	H	H	H	H	H	H	H
	A05	5274695	H	B	H	H	H	B	H	B	H	A	H	H	A	B	H	H	H	A	H	B	H	B	B	H	H	H	A	H	B	B	A	A	A	B	H	B	H	A	H	A	H	H	H	H	H	H	H
	A05	5274704	H	B	H	H	H	B	H	B	H	A	H	H	A	B	H	H	H	A	H	B	H	B	B	H	H	H	A	H	B	B	A	A	A	B	H	B	H	A	H	A	H	H	H	H	H	H	H
	A05	5613937	H	B	H	H	H	B	H	H	H	A	H	H	A	B	H	A	H	A	H	B	H	B	B	H	H	H	A	H	B	H	A	A	A	B	H	H	H	A	H	A	H	H	H	H	H	H	H
	A05	5625130	H	B	H	H	H	B	H	B	H	A	H	H	A	B	H	A	H	A	H	B	H	B	B	H	H	H	A	H	B	H	A	A	A	B	H	H	H	A	H	A	H	H	H	H	H	H	H
	A05	5736758	H	B	H	H	H	B	H	B	H	A	H	H	A	B	H	A	H	A	H	B	H	B	B	H	B	H	A	H	B	H	A	A	A	B	H	H	H	A	H	H	H	H	H	B	H	H	H
	A05	5736783	H	B	H	H	H	B	H	B	H	A	H	H	A	B	H	A	H	A	H	B	H	B	B	H	B	H	A	H	B	H	A	A	A	B	H	H	H	A	H	H	H	H	H	B	H	H	H
	A05	5769027	H	B	A	H	H	B	H	B	H	A	H	H	A	B	H	A	H	A	H	B	H	B	B	H	H	H	A	H	B	H	A	A	A	B	H	H	H	A	H	A	H	H	H	H	H	H	H
	A05	5769031	H	B	A	H	H	B	H	B	H	A	H	H	A	B	H	A	H	A	H	B	H	B	B	H	H	H	A	H	B	H	A	A	A	B	H	H	H	A	H	A	H	H	H	H	H	H	H
	A05	5769038	H	B	A	H	H	B	H	B	H	A	H	H	A	B	H	A	H	A	H	B	H	B	B	H	H	H	A	H	B	H	A	A	A	B	H	H	H	A	H	A	H	H	H	H	H	H	H
	A05	5769039	H	B	A	H	H	B	H	B	H	A	H	H	A	B	H	A	H	A	H	B	H	B	B	H	H	H	A	H	B	H	A	A	A	B	H	H	H	A	H	A	H	H	H	H	H	H	H
	A05	5769047	H	B	A	H	H	B	H	B	H	A	H	H	A	B	H	A	H	A	H	B	H	B	B	H	H	H	A	H	B	H	A	A	A	B	H	H	H	A	H	A	H	H	H	H	H	H	H
	A05	5800213	H	B	A	H	H	B	H	B	H	A	H	H	A	H	H	A	H	A	H	B	H	B	B	H	H	H	A	H	B	H	A	A	A	B	H	H	H	A	H	A	H	H	H	H	H	H	H
	A05	6293021	H	B	A	H	H	B	H	B	H	A	H	H	A	H	H	A	H	A	H	B	H	B	B	H	H	H	A	H	B	H	A	A	A	B	H	H	H	A	H	A	H	H	H	H	H	H	A
	A05	6293831	H	B	A	H	H	B	H	B	H	A	H	H	A	B	H	A	H	A	H	B	H	B	B	H	H	H	A	H	B	H	A	A	A	B	H	H	H	A	H	A	H	A	H	H	H	H	A
	A05	6293838	H	B	A	H	H	B	H	B	H	A	H	H	A	B	H	A	H	A	H	B	H	B	B	H	H	H	A	H	B	H	A	A	A	B	H	H	H	A	H	A	H	A	H	H	H	H	A
	A05	6293843	H	B	A	H	H	B	H	B	H	A	H	H	A	B	H	A	H	A	H	B	H	B	B	H	H	H	A	H	B	H	A	A	A	B	H	H	H	A	H	A	H	A	H	H	H	H	A
	A05	6295875	H	B	A	H	H	B	H	B	H	A	H	H	A	B	H	A	H	A	H	B	H	B	B	H	H	H	A	H	B	H	A	A	A	B	H	H	H	A	H	A	H	H	H	H	H	H	A
	A05	6475397	H	B	A	H	H	B	H	B	H	A	H	A	A	B	H	A	H	A	H	B	H	B	B	H	H	H	A	H	B	H	A	A	A	B	H	H	H	A	H	A	H	H	H	H	H	H	A
	A05	6491930	H	B	A	H	H	B	H	B	H	A	H	A	A	B	H	A	H	A	H	B	H	B	B	H	H	H	A	H	B	H	A	A	A	B	H	H	H	A	H	H	H	H	H	H	H	H	A
	A05	6491941	H	B	A	H	H	B	H	B	H	A	H	A	A	B	H	A	H	A	H	B	H	B	B	H	H	H	A	H	B	H	A	A	A	B	H	H	H	A	H	H	H	H	H	H	H	H	A
[truncated: 2,234 more rows]
[truncated: 49 more columns]
